# Supplementary material for: Evolution of Prdm Genes in Animals: Insights from Comparative Genomics
Source: PubMed Central journal article supplement — Mol Biol Evol. 2015 Nov 11;33(3):679–96. doi: 10.1093/molbev/msv260 (PMC4760075; doi:10.1093/molbev/msv260), 2015-11-11
Supplement: supp_msv260_Vervoortetal_suppfigures_revised.pdf [file supp_msv260_Vervoortetal_suppfigures_revised.pdf]

---Block d---

---a'---Block a---a'---

AdoMet Catalytic site

Hsap\_SETD6 RVRSRLYHQVALVMAYFQEPLE-----EEDEKEPNSPVM[EA]DILNHLA-NANL[YSANCLR  
Hsap\_SETD7 SCISTNLPDPYSESRVYVAESISS-----AGEG[F-SKV--AVGPN]VMSPFN-GVR[THO]E[DS--  
Hsap\_SUV420H1 KMQEKLTDSGGFELPCNRYSSSQN-----CAK[V-A]K[---E]WKND[IE]LLV-CC[AEL]SE[IE]E--  
Hsap\_SUV420H2 -----PESGFTLPCTRY-S[ETN]-----CAK[V-ST]---AWK[NE]LELLV-CC[AEL]READE--  
Hsap\_MLL1 SFQSTVHSKSSQYKMKTEWKSNNYLARSICGLG[Y-AAR--D]IKKHTMVI[BYI-GT]IRN[VAN]RKEK  
Hsap\_MLL2 AYQSTFHSKSSQYRLRTEWKNNNYLARSICGLG[Y-AAR--D]IKKHTMVI[BYI-GT]IRN[VAN]RREK  
Hsap\_MLL3 RATS[DL]EMP[RFR]HLKK[SKEAVGVYRSPIH]GRG[F-CKR--N]IDAGEMVI[BYA-GN]VRSIQTDKREK  
Hsap\_MLL4 RATS[EL]EMA[RFR]HLKK[SKEAVGVYRSPIH]GRG[F-CKR--N]IDAGEMVI[BYB-GI]VRSVLTDK-RE  
Hsap\_SETDA1 SEQRRL[DS]DLKLNQKFRKKKLRFGRSRIHEWG[F-AME--P]IAADEMVI[BYV-GQ]NRQMVADMREK  
Hsap\_SETDB1 TSATAVDSDD[Q]T[ISS]-----GSEGD[FED]KKNMTC[PMKROVAVKST]GFALKSTH-GIA[KSTN]VADSVK  
Hsap\_SETDB2 LLIESD[IDITKY]EETPPRSRCNQATTLN[N]KKA-IEVQIQK[Q]EG[STACORQ]FCD[EL]SETK  
Hsap\_ASH1L RIQRHEWQC[ER]FRAEEK-----GWG[R-TRE--P]IKAGQF[IE]BYI-GEV[SE]Q[EF]RN--R  
Hsap\_SETD2 RFQKQHADVEV[IL]TEKK-----GWG[R-AAK--D]E[SN]T[EV]LBYC-GEV[DHK]E[FKARV]K  
Hsap\_NS2 CFTKRY[PE]TK[IK]TDGK-----GWG[V-AKR--D]IKKGEFVNB[BYV-GE]L[DE]E[CMARI]K  
Hsap\_NS3 CFTKRLYP[DAE]IKTERR-----GWG[R-TKR--S]IKKGEFVNB[BYV-GE]L[DE]E[ECRLRI]K  
Hsap\_H3\_36\_H4\_20 CFSKRQY[PEVE]F[FL]QR-----GWG[R-TKT--D]IKKGEFVNB[BYV-GE]L[DE]E[ECRAR]R  
Hsap\_EZH1 RECDDPKVNSCKNSIQRLGKHL[LL]LAPS[DV]AGWGF[F-]I[KE--S]VQKNEFIS[BYC-GE]L[SQ]EADRRGK  
Hsap\_EZH2 RECDDPKVNSCKNSIQRGSKHL[LL]LAPS[DV]AGWGF[F-]I[KD--P]QKNEFIS[BYC-GE]L[SQ]EADRRGK  
Hsap\_SETMAR --CRNRV[QKGLQ]F[QV]FKTHK-----GWG[R-TLE--F]IPKGFV[CYB]A-GEV[GFSE]V[QR]IH  
Hsap\_EHMT1 NCRNRV[QKGLQ]R[AR]LQLYRTRDM-----GWG[V-SLQ--D]IEP[GT]FV[CYB]V-GE[LSD]S[EA]DV---  
Hsap\_EHMT2 NCKNRV[QSG]K[VR]LQLYR-TAKM-----GWG[V-ALQ--T]IEP[GT]FIC[BYV-GE]L[S]D[A]ADV---  
Hsap\_SUV39H1 DCPNRV[QKGLQ]RYDL[CI]FR-TDGR-----GWG[V-TLE--K]IKR[N]FVMB[BYV-GE]L[TS]E[A]ERRGQ  
Hsap\_SUV39H2 DCPNRV[QKGLQ]RYDL[CI]FR-TSNGR-----GWG[V-TLV--K]IKR[N]FVMB[BYV-GE]L[TS]E[A]ERRGQ  
Hsap\_SETD8 SRKSKA[ES]GKEEGMKI-D-L[DGK]-----GRGVI[A-T]---Q[FS]G[DE]VVE[HYH-GD]EIT[AKKR-E  
Hsap\_prdm1 VQAEASL[PRN]L[FK]P-----Y-ATN[SE]---EVI[GV]M-SKE--YI[PKGT]F[GL]L-GEV[YN]T[IV]PK--  
Bflo\_prdm1 PRAEGL[PRN]L[YK]K-----F-NQ[Q-N]-----EVL[GV]C-SKE--YI[PKGT]F[GL]L-GEV[YN]T[IV]PK--  
Dmel\_prdm1 NRADKTL[RS]L[TK]SSMVY-STPNV-----KTEGVI[SSG--V]IEP[GT]F[GL]L-GEV[YN]T[IV]PK--  
Smar\_prdm1 NRAEASL[PRN]L[FK]P-----S[Q]TLN-----DVI[GV]M-SSD--YI[PKGT]F[GL]L-GEV[YN]T[IV]PK--  
Hsap\_prdm2 EHVLRGL[PE]E[VR]F[PS]AVDKT-----R[IG]V[M-A]K[---P]IKK[GE]FVNB[BYV-GD]K[KR]S[Q]VKN--  
Bflo\_prdm2 VPDS[V]L[AE]L[ER]SGV[SE]-----TKNGVI[CKR--S]IKK[GE]FVNB[BYV-GD]K[KR]S[Q]VKN--  
Lgig\_prdm2 --QN[LE]KNE[EF]FRP--S-E[EIG]-----KOG[IV]C-CKR--KIK[EGT]F[GL]L-GEV[LH]K-QG--  
Hsap\_prdm3 -----V[PGA]-----GLG[V-TKR--K]IEV[GE]F[GL]L-GEV[YS]E[AD]RRGK--  
Hsap\_prdm16 IPED[V]L[AE]D[FE]L[RE]--S-S[PGA]-----GLG[V-AKR--K]IEV[GE]F[GL]L-GEV[YS]E[AD]RRGK--  
Bflo\_prdm3\_16 -----V[PGA]-----GLG[V-AKR--K]IEV[GE]F[GL]L-GEV[YS]E[AD]RRGK--  
Hsap\_prdm4 SRAR[SL]P[Q]L[V]R[Q]----S[VGA]-----EVI[GV]M-TGE--TI[EV]RT[CF]G[EL]L-GQ[Q]SHSME[V]AE--  
Bflo\_prdm4 -----S[VGA]-----EVI[GV]M-TGE--TI[EV]RT[CF]G[EL]L-GQ[Q]SHSME[V]AE--  
Pdum\_prdm4 SRAR[SL]P[Q]L[V]R[Q]----S[VGA]-----EVI[GV]M-TGE--TI[EV]RT[CF]G[EL]L-GQ[Q]SHSME[V]AE--  
Smar\_prdm4 TQAR[TL]P[Q]L[V]R[Q]KQVKN-----QVGV[F-AGD--N]LEK[T]F[GL]L-GEV[RH]IO[ED]IDG--  
Hsap\_prdm5 -MLG[V]Y[PDR]FS[KS]S--S-R[VQD]-----GWG[Y-TA]---RVRK[GE]F[GL]L-GEV[RH]IO[ED]IDG--  
Hsap\_prdm6 PPELPEL[PE]V[CT]CT--S-T[PGL]-----HYG[C-AAQ--R]IQGG[EW]IG[PP]Q-GVL[PP]E[Q]VQA--  
Bflo\_prdm6 PYAVTSL[PE]V[CT]CH--S-S[PGE]-----GYG[C-AT]---TIEV[GT]WIG[PP]E-GVR[RS]E[IP]C--  
Nvec\_prdm6a PYALRR[PE]V[CT]CK--S-N[PGA]-----GYG[Q-ANT--V]I[AG]AWI[GP]YE-GNV[KAB]PARK--  
Nvec\_prdm6b PLAAVFV[PE]V[CT]CK--S-S[PGA]-----KFGV[C-AA]---PIEP[GT]WIG[PP]E-GQIVTR[EV]IK--  
Hsap\_prdm9 NRSA[SL]P[GL]L[GPS]GI[Q]A-----GLG[VNEAS--D]IEP[GL]F[GL]L-GEV[TE]D[EA]AN--  
Bflo\_prdm7\_9 NRAVHTL[PE]D[YL]S[CP]--S-K[KGA]-----GDG[VLDG]K--A[PK]NEV[FG]PYD-GK[V]TGP-F[IG]M--  
Lgig\_prdm7\_9 NRCY[TAP]D[CE]E[RE]--S-S[PNA]-----GLG[F-AS]I--TI[EN]RS[FG]PYG-GD[V]KDT[ET]AH--  
Pdum-prdm7\_9a -----S-S[PNA]-----GLG[F-AS]I--TI[EN]RS[FG]PYG-GD[V]KDT[ET]AH--  
Nvec\_prdm7\_9 TTARATL[PH]C[IE]K[TK]---S-S[PNA]-----GLG[V-FSKS--R]IAKRV[MF]G[PYK-GTK]KLS[E]Q[M]---  
Aque\_prdm7\_9 QYTS[P]V[ER]ELT[V]KESKIPKA-----GLG[V-FATE--L]IEN[GV]F[GL]L-GEV[QK]Y[ED]IDE--  
Hsap\_prdm8 -----I[FTS]V[ITTC--D]IEN[AI]F[GL]L-GEV[SH]T[SLY]S[AF]-I  
Pdum\_prdm8 EFPYD[V]Y---V[Q]ARGGG-GRKEA-----FQGV[ITTS--Q]ISAGT[VE]G[IP-RN]V[LT]P[AYL]-  
Smar\_prdm8 -----MVE-----SLS[V]A-SOC--DHPD[VV]G[BMP-GN]GSL[P]VLI-G  
Hsap\_prdm10 NKTKFS[V]P[S]F[E]K[RE]--S-T[PGE]-----GOGAF[TKQ--F]IEP[GR]IL[GL]L-GEV[TE]R[E]YK[L]E  
Hsap\_prdm10 TRARASL[PL]V[L]Y[DR]F-----LG[GVF-SKR--R]IPKRT[Q]F[GL]L-GEV[VR]G[S]E[KDCY]I  
Hsap\_prdm15 AQGRSSL[PL]N[LE]R[LE]D[EG]-----REGV[F-]LIT--QV[KRT]Q[FG]P[ES]R[RAK]W[KESA]A  
Bflo\_prdm10\_15 SKARASL[PL]N[Q]L[F]AKS[GE]-----TEHGV[F-TKR--A]P[RR]T[Q]F[GL]L-GEV[AK]L[K]E[PE]GTF  
Lgig\_prdm10\_15 SRAWSSL[PL]Q[ML]Y[RF]N-----K[IGV]F-AKK--P[SKMT]Q[FG]P[AD]M[SSQ]D[L]NTRF  
Pdum\_prdm10\_15 -RAWASL[PL]H[LQ]FRL[GDS]-----TD[GVF-AKR--S]IEP[RT]Q[FG]P[EL]L-GEV[ES]R[M]V[T]  
Smar\_prdm10\_15a SRAWASL[PL]V[GY]LAINK[V]G[V]R[ET]GEA-----V[FGV]F-AKK--P[IP]K[RS]F[GL]L-GEV[T]K[M]E[V]IQ--  
Hsap\_prdm11 DRAA[IT]P[Q]G[E]V[V]K--D-TS[GES]-----D[VRC]VNE--V[IP]K[GF]F[GL]L-GEV[Q]S[T]O[K]S--  
Hsap\_prdm12 KLSS[V]L[BAE]V[IAQ]---S-S[PGE]-----GLG[F-SKT--W]IKAGT[EM]G[PE]T-GR[V]IAP[H]VDI--  
Bflo\_prdm12 SLTGV[V]L[PQ]L[EA]RS--S-L[PCR]-----RWGV[F-ANT--W]IKQGT[EM]G[PYT-GR]V[NPT]D[VDP]--  
Lgig\_prdm12 -ITN[TK]P[EQ]V[TSR]---S-T[PGC]-----M[IGV]T-STT--WIST[GT]Q[M]G[PE]V-GR[V]KLE[D]IQN--  
Pdum\_prdm12 -----P[EV]R[LV]S--G[P]GA-----HTG[V]A-AAA--WIKQGT[EM]G[PYL-GR]V[HPT]Q[L]DH--  
Smar\_prdm12 LPNLAN[PE]D[VR]S[PS]---R[P]GQ-----T[LG]V[F-SNT--W]ICEGT[EM]G[PTS-GK]I[KTT]E[TAS]--  
Nvec\_prdm12 --AF[V]L[PE]Q[V]T[AP]---S-S[P]GV-----Q[LG]V[F-STC--W]IKEGT[Q]M[G]PYT-GR[V]K[P]Q[V]NY--  
Aque\_prdm12 SKQFPD[V]D[IF]R[FGP]---S-T[KFR]-----S[V]G[V]F-C[Q]O--F[IN]Q[AV]L[G]P[ET-GR]K[V]E[V]IT--  
Hsap\_prdm13 -----P[AG]L[R]G-----P[IE]GTF[L]L[RY]V--SDR[EP]G[F]K[K]---  
Hsap\_prdm14 DRDS[V]L[PE]G[L]C[M]Q[V]F[G-E]P-----H[FGV]F-CSS--F[IA]K[G]M[FG]P[Q-GK]V[N]A[S]E[V]KT--  
Bflo\_prdm14 -----GT[FG]P[PY]G-K[I]N[IS]E[IKT]---  
Lgig\_prdm14a -----G[LN]I[Q]---[I]N[GGI]-----LHF[GV]F[S]K[S--V]ITKGT[RG]P[PK-GK]V[N]T[S]E[IKT]---  
Lgig\_prdm14b ESSS[V]D[LE]P[EV]V[HQ]---[I]FAGT-----LHH[GV]F[CA]K[T--V]ISK[G]M[FG]P[PK-GK]V[N]T[S]E[IKT]---  
Pdum\_prdm14 DPTA[V]D[V]E[G]E[V]H---[I]NFAGT-----IHY[GV]F[V]K[K--V]IPKGT[FG]P[PYR-GR]V[N]T[S]E[IKT]---  
Nvec\_prdm14a EADV[V]L[PP]G[L]V[KE]---S-N[PNA]-----GRG[V]F-AKC--I[IP]K[H]E[FG]P[PYI-GR]V[TR]K[E]A[K]T--  
Nvec\_prdm14c -----V[PG]L[R]I[S]---A-A[GTA]-----SQY[V]M[CS]Q[V]I[SE]G[M]F[GL]L-GEV[V]Q[LS]Q[NE]--  
Nvec\_prdm14d -----  
Bflo\_prdmX -----MDEGRE[RG]Q[TM]DERDST-----ELLT[GV]M-TTT--DIEP[RT]V[FG]P[YS]GTD[V]D[V]A[V]LIGIR  
Smar\_prdmX1 VQAEATL[PE]G[L]K[E]T[V]DKI-----H[CG]G[F-A]TE--K[IE]H[AI]Q[FG]L[GL]L-GEV[SE]A[E]I[SE]E--  
Aque\_prdmX1 SP[IA]---[L]PE[V]T[TE]---S-----G[V]I-ANS--V[IG]S[GV]R[YG]P[PK-GL]K[A]E[E]L[M]T--  
Aque\_prdmX2 NQNS[V]L[PE]L[T]IN[SCG]-----KOG[V]F-AIA--R[IE]S[GV]R[YG]P[PK-GL]K[A]E[E]D[L]M[E]--

AdoMet Catalytic site

---Block d---

---a'---Block a---a'---

-----b'-----Block b-----b'-----

R/HxxNHxC box (AdoMet)

\*\*\*\*\*

Hsap\_SETD6 MVATQPIPKGHEEN-T-----YGOA-----NWOLIHMGFVEPYEDNTDDTADLGM---  
Hsap\_SETD7 ---RDWALNGNTL---SL EETV-IVPEPYNHVSKC---ASGHKANHSFYDMFVHPRF-G-  
Hsap\_SUV420H1 ---GNDLSEVYSY---RKNCAQLWLGPAAFNHDCRPN---CKFYSTGR-  
Hsap\_SUV420H2 ---GLR---AGNDLSIMYSY---RKRSAQLWLGPAAFNHDCRPN---CKFYVPADG-  
Hsap\_MLL1 LY---ESQNRGVYMF---FMNDHV-IDALLTGCPA---RYNHSCAPNCVAEVTFFR-G-  
Hsap\_MLL2 IY---EEQNRGIYMF---FINNEHV-IDALLTGCPA---RYNHSCAPNCVAEVTFFDK-E-  
Hsap\_MLL3 YY---DSKGIQYMF---RIDSEV-IDAN-MHG---NAA---RFNHSCPEPCYSRVNIDG-Q-  
Hsap\_MLL4 KFY-DGKGIQYMF---FMDDFVD-IDAN-MHG---NAA---RFNHSCPEPCYSRVNIDG-Q-  
Hsap\_SETDA1 RYV-QEKGIGSSYLF---FVHDTI-IDAN-KCG---NLA---RFNHSCPTNICYAKYVTHES-Q-  
Hsap\_SETDB1 GESAPVRKNTROFI---DGEESC-IDAK-LEG---NLG---RYNHSCSPNLFVONVFDVTD-HD  
Hsap\_SETDB2 ---NTSSDSLTKF---NKGNVL-IDAN-KEG---NVG---RFNHSCPNLLVONVFDVTD-HN  
Hsap\_ASH1L MIEQYHNHSDHYCL---NLNLSGMV-IDSY-RMG---NEA---RFNHSCDPNCEMCKWSVNG-G-V-  
Hsap\_SETD2 EYARNKNIHYM---ALKNDEI-IDAN-QKG---NCS---RFNHSCPEPCETOKWTVNG-Q-  
Hsap\_NS2D HAH-ENDITHFYML---TIKDRIDAG-PKG---NNS---RFNHSCQPNCEFLKWTVNG-D-  
Hsap\_NS3D RAH-ENSVNRFYML---TVTKDRIDAG-PKG---NNS---RFNHSCNPNCEFLKWTVNG-D-  
Hsap\_H3\_36\_H4\_20 YAQ-EHDITNFYML---TLKDRIDAG-PKG---NNA---RFNHSCQPNCEFLKWSVNG-D-  
Hsap\_EZH1 V---YDKYMSSYLF---NLNNDV-IDAN-RKG---NRI---RFNHSVNPNICYAKYVTVNG-G-D-  
Hsap\_EZH2 V---YDKYMSSYLF---NLNNDV-IDAN-RKG---NRI---RFNHSVNPNICYAKYVTVNG-G-D-  
Hsap\_SETMAR LQTKSDSNYIIAREHXY---NCOMETFDPEYIG---NLG---RFNHSCPEPN---LLIPVR-ID  
Hsap\_EHMT1 ---REEDSYLDL-N---KDGVEYC-IDAR-FYG---NVS---RFNHHCPEPNLVPVRVFAH-QD  
Hsap\_EHMT2 ---REEDSYLDL-N---KDGVEYC-IDAR-FYG---NVS---RFNHHCPEPNLVPVRVFAH-QD  
Hsap\_SUV39H1 I---YDRQATYLDL---YVDVYT-IDAA-FYG---NLS---HFVNHSCDPMLOVYVFDN-LD  
Hsap\_SUV39H2 F---YDNKGITYLFDL---DYESDET-IDAA-FYG---NVS---HFVNHSCDPMLOVYVFDN-LD  
Hsap\_SETD8 ALYAQDPSTGCOYMY---YF---QYLSKTYC-IDAN-RETN---RLG---RLNHSCCNQTKLHDIDG-V-  
Hsap\_prdm1 ---NAN-R-KKFWR-VY---SGEHLHF-IDCF-NEEKS-NWM---RVNPAHSGE-EONLVAACQ-N-G-  
Bflo\_prdm1 ---GAN-R-KKFWR-VY---DGEFQF-IDCF-DITKS-NWM---RVNPAHSGE-EONLVAACQ-N-G-  
Dmel\_prdm1 ---DKN-KARFWR-VQ---GDDYY-IDGS-DRSQS-NWM---RVNPAHSGE-EONLVAACQ-N-G-  
Smar\_prdm1 ---STNRKFWR-LYN---NEEYLC-IDCF-DVNS-NWM---RVNPAHSGE-EONLVAACQ-N-G-  
Hsap\_prdm2 ---NVYMWVY---YPMGMCIDAN-DPEKG-NWI---RVNPAHSGE-EONLVAACQ-N-G-  
Bflo\_prdm2 ---PDMWEIR---TKGWC-IDCF-DITKS-NWM---RVNPAHSGE-EONLVAACQ-N-G-  
Lgig\_prdm2 ---LLDYRVAWEVWDL---ESDKLYI-IDCF-DVNS-NWM---RVNPAHSGE-EONLVAACQ-N-G-  
Hsap\_prdm3 ---YGWEL---FYNKFC-IDCF-DVNS-NWM---RVNPAHSGE-EONLVAACQ-N-G-  
Hsap\_prdm16 ---ETDGEWQIGCITKLGSEKFC-IDAN-QAGAG-SWI---KYIRVACSCD-EONLVAACQ-N-G-  
Bflo\_prdm3\_16 ---FGKKEI-IDCF-DVNS-NWM---RVNPAHSGE-EONLVAACQ-N-G-  
Hsap\_prdm4 ---WTDKAVNHMKIY---HNGVEEC-IDCF-DVNS-NWM---RVNPAHSGE-EONLVAACQ-N-G-  
Bflo\_prdm4 ---DERSH---IDAR-DENEA-NWM---RVNPAHSGE-EONLVAACQ-N-G-  
Pdum\_prdm4 ---DEVKTPMFKIF---EFGASQV-YDCS-DEESS-NWM---RVNPAHSGE-EONLVAACQ-N-G-  
Smar\_prdm4 ---IHSDKNNMKVY---NDELTLGLAD-DENQC-NWM---RVNPAHSGE-EONLVAACQ-N-G-  
Hsap\_prdm5 ---NMDYRIMWE-VRG---SGEVLVI-IDAN-NPRHS-NWI---RVNPAHSGE-EONLVAACQ-N-G-  
Hsap\_prdm6 ---GAVRNTQHWI---YD---QDGTQHWI-IDCF-DVNS-NWM---RVNPAHSGE-EONLVAACQ-N-G-  
Bflo\_prdm6 ---AV---KTHFEW---MXY---DNMGNHWI-IDCF-DVNS-NWM---RVNPAHSGE-EONLVAACQ-N-G-  
Nvec\_prdm6a ---EK---NFKMWE---IF---KMGFYLVI-IDAN-NPRHS-NWI---RVNPAHSGE-EONLVAACQ-N-G-  
Nvec\_prdm6b ---REL-DTSMWE---LY---KEGFRSHI-IDCF-DVNS-NWM---RVNPAHSGE-EONLVAACQ-N-G-  
Hsap\_prdm9 ---NGSMLIT---GRNCYIYDCK-BKSWA-NWM---RVNPAHSGE-EONLVAACQ-N-G-  
Bflo\_prdm9\_9 ---T-SG-YAWQ---IS---KNDKLYI-IDAN-DITKS-NWM---RVNPAHSGE-EONLVAACQ-N-G-  
Lgig\_prdm9\_9 ---N-SG-YAWQ---IS---KNDKLYI-IDAN-DITKS-NWM---RVNPAHSGE-EONLVAACQ-N-G-  
Pdum\_prdm9\_9a ---LH---QEKARH---IDCF-DVNS-NWM---RVNPAHSGE-EONLVAACQ-N-G-  
Nvec\_prdm9\_9 ---END-TS-YMWE---IS---RDGNFNHWI-IDCF-DVNS-NWM---RVNPAHSGE-EONLVAACQ-N-G-  
Aque\_prdm9\_9 ---DDDTSMWEIK---FVNESYI-IDCF-DVNS-NWM---RVNPAHSGE-EONLVAACQ-N-G-  
Hsap\_prdm8 ALKSTDKRTVPIYLF---FVNTSA---ANGS-SEGL-MWI---RVNPAHSGE-EONLVAACQ-N-G-  
Pdum\_prdm8 ---IGHMTCDNHP---VHT---VGLMDTD-IDCF-DVNS-NWM---RVNPAHSGE-EONLVAACQ-N-G-  
Smar\_prdm8 ---RECIDVRSFSQ---I---LQVLDLR---TEVS-DVYC-EWM---RVNPAHSGE-EONLVAACQ-N-G-  
Mley\_prdm8 ---RQKESGAMK-AV---SKDGVIT-IDCF-DVNS-NWM---RVNPAHSGE-EONLVAACQ-N-G-  
Hsap\_prdm10 HLKVSLLKGDGRKER---DLHEDL---FELS-DETLC-NWM---RVNPAHSGE-EONLVAACQ-N-G-  
Hsap\_prdm15 ---RQKESGAMK-AV---SKDGVIT-IDCF-DVNS-NWM---RVNPAHSGE-EONLVAACQ-N-G-  
Bflo\_prdm10\_15 LKLOHKTGEEQP---DDQPELVYDLD-NEDEC-NWM---RVNPAHSGE-EONLVAACQ-N-G-  
Lgig\_prdm10\_15 LLMVLMNFFLYQLEKN---DGTGYSF---ETS-DENKC-NWM---RVNPAHSGE-EONLVAACQ-N-G-  
Pdum\_prdm10\_15 ---NKA-SLQ-V---FEGHKFY-FHAI-DENKC-NWM---RVNPAHSGE-EONLVAACQ-N-G-  
Smar\_prdm10\_15a ---DDLVLQIEAE---SGEIMH---LDT-DESMS-NWM---RVNPAHSGE-EONLVAACQ-N-G-  
Hsap\_prdm11 ---AGFSMLTV---DNNRYKS-IDGS-DETKA-NWM---RVNPAHSGE-EONLVAACQ-N-G-  
Hsap\_prdm12 ---CKN-NN-IMWE-VEN---EDGTIRYI-IDAS-QEDHR-SWM---RVNPAHSGE-EONLVAACQ-N-G-  
Bflo\_prdm12 ---CVE-NE-IMWE-VET---PYGDI SHI-IDAS-QEDHR-SWM---RVNPAHSGE-EONLVAACQ-N-G-  
Lgig\_prdm12 ---QPDITD-NMWE-VED---DQGVLYI-IDCF-DVNS-NWM---RVNPAHSGE-EONLVAACQ-N-G-  
Pdum\_prdm12 ---TAHNHOMWE-VEDS---FGEVLHI-IDGS-PTSLR-SWI---RVNPAHSGE-EONLVAACQ-N-G-  
Smar\_prdm12 ---DNC-AWE-VDLSDNGQVHI-IDAS-DEKTR-CWI---RVNPAHSGE-EONLVAACQ-N-G-  
Nvec\_prdm12 ---EID-NN-IMWE-VLN---EDGS SHI-IDAK-ENPR-NWM---RVNPAHSGE-EONLVAACQ-N-G-  
Aque\_prdm12 ---L---KLKSYWE-LH---QDQKQMC-IDCF-DVNS-NWM---RVNPAHSGE-EONLVAACQ-N-G-  
Hsap\_prdm13 ---VVMV---QDGETVQW---VDES-GGSPLEWI---GLVRAARNSI-EONLVAACQ-N-G-  
Hsap\_prdm14 ---YGDNSVMWEIF---DGHSHI-IDCF-DVNS-NWM---RVNPAHSGE-EONLVAACQ-N-G-  
Bflo\_prdm14 ---DDD-NS-IMWE-IF---QDQKSHM-IDCF-DVNS-NWM---RVNPAHSGE-EONLVAACQ-N-G-  
Lgig\_prdm14a ---FDD-NT-IMWE-IF---KEGKSHI-IDCF-DVNS-NWM---RVNPAHSGE-EONLVAACQ-N-G-  
Lgig\_prdm14b ---NDD-NS-IMWE-VF---QEGKSHI-IDCF-DVNS-NWM---RVNPAHSGE-EONLVAACQ-N-G-  
Pdum\_prdm14 ---NDD-NS-IMWE-VF---QEGKSHI-IDCF-DVNS-NWM---RVNPAHSGE-EONLVAACQ-N-G-  
Nvec\_prdm14a ---DLN-NC-IMWE-VF---AHEKSYI-IDCF-DVNS-NWM---RVNPAHSGE-EONLVAACQ-N-G-  
Nvec\_prdm14b ---YK---ESPYIWE-VF---DYGKTHL-IDCF-DVNS-NWM---RVNPAHSGE-EONLVAACQ-N-G-  
Nvec\_prdm14c ---RED-NA-IMWE-VF---QNGQFSHI-IDGS-T-ESE-NWM---RVNPAHSGE-EONLVAACQ-N-G-  
Nvec\_prdm14d ---Q---QDGETVQW---VDES-GGSPLEWI---GLVRAARNSI-EONLVAACQ-N-G-  
Bflo\_prdmX T---KDKRMVSAV---VDPGCG---R---AGETLKIWI---RVNPAHSGE-EONLVAACQ-N-G-  
Smar\_prdmX1 ---DANLKNMWE-V---FGETKT---IDGS-DPESS-NWI---RVNPAHSGE-EONLVAACQ-N-G-  
Aque\_prdmX1 ---ETD-DISCWE-I---KCCSTYI-IDAS-DESNS-NWI---RVNPAHSGE-EONLVAACQ-N-G-  
Aque\_prdmX2 ---ETNFNAMWEVN---CGSTYI-IDAS-DESNS-NWI---RVNPAHSGE-EONLVAACQ-N-G-  
\*\*\*\*\*

R/HxxNHxC box (AdoMet)

-----b'-----Block b-----b'-----

-----c'-------Block c-

F/Y switch AdoMet and target Lys  
\* \*

Hsap\_SETD6 ---VTVREAAIQGKTEAERHIVYER  
Hsap\_SETD7 ---PIKCIITLFAVEADEELTVAYGY  
Hsap\_SUV420H1 ---DTACVVALLDIEPGEELSCYGG  
Hsap\_SUV420H2 ---NAACVAVLMDIEPGEELTCYGG  
Hsap\_MLL1 ---HMTIIISSRIQKGEELCYDYKF  
Hsap\_MLL2 ---DMIIIISSRIPKGEELTYDYQF  
Hsap\_MLL3 ---KIVIVIFAMFKIYRGEELTYDYKF  
Hsap\_MLL4 ---KIVIVIFALRILRGEELTYDYKF  
Hsap\_SETDA1 ---KIVIVYSKQPIGVDEELTYDYKF  
Hsap\_SETDB1 LRFPPVAIFASKIRAGLELTDWYNY  
Hsap\_SETDB2 RNFPLVAIFTNFYKARLELTDWYGY  
Hsap\_ASH1L ---YHIGLYVALKDPAGLELTYDYNF  
Hsap\_SETD2 ---LRVGFFTTGLPSGSELTFDYQF  
Hsap\_NSD2 ---TRVGLFAVCDIPAGLELTFNYNL  
Hsap\_NSD3 ---VRVGLFALCDIPAGMELTFNYNL  
Hsap\_H3\_36\_H4\_20 ---TRVGLFALSIDIKAGLELTFNYNL  
Hsap\_EZH1 ---HRTGIFAKAIQAGEELFFDYRY  
Hsap\_EZH2 ---HRTGIFAKAIQTGEELFFDYRY  
Hsap\_SETMAR SMVPRVALFAAKDIVPEEELSYDYSG  
Hsap\_EHMT1 LRFPRVAIFSTRIIEAGEELGFDYGE  
Hsap\_EHMT2 LRFPRVAIFSSDIRTGEELGFDYGD  
Hsap\_SUV39H1 ERLPRVAIFATRTIRAGEELTFDYNM  
Hsap\_SUV39H2 TRLPRIALFSTRTINAGEELTFDYQM  
Hsap\_SETD8 ---PHIILIASDIAAGEELLYDYGD  
Hsap\_prdm1 ---MNIYYTIRKPIANQELLVWYCR  
Bflo\_prdm1 ---MNIYYFTIRKPILEDTELLVWYCR  
Dmel\_prdm1 ---ENIYYTTRDIDENEELLVWYCR  
Smar\_prdm1 ---MNIYYTIRKPILENTELLVWYCK  
Hsap\_prdm2 ---RATYYTIRKPIAPGEBLLVWYNG  
Bflo\_prdm2 ---QRIYYTIRKPIKPGEBLLVWFNS  
Lgig\_prdm2 ---NEIYYTIRKPIEJGEBLLVWFNL  
Hsap\_prdm3 ---DOIYYVAVADIAFGBELLVEMKS  
Hsap\_prdm16 ---EQIYYVVKDIEPGBELLVHVKE  
Bflo\_prdm3\_16 ---DOIYYVVKDIEVEMGELLVVMKD  
Hsap\_prdm4 ---GRIFFCTSDIPEENELLFVYSR  
Bflo\_prdm4 ---GRIFFTSCKDIAPGEBLLVWFAG  
Pdum\_prdm4 ---QDIYFITKKAAPGTELLVWYSY  
Smar\_prdm4 ---SOIYYMTTRITILEDELLVWYST  
Hsap\_prdm5 ---ENIYYLAVEDIETDELLVGYLD  
Hsap\_prdm6 ---SNIYYFACDIPRGTELLVWYND  
Bflo\_prdm6 ---GCIYYMIFREIKTGBELLVWYDP  
Nvec\_prdm6a ---GRIYYTYRTIPMGBELLVWYDD  
Nvec\_prdm6b ---GNIYYTAYKHIPKGBELLVWYDD  
Hsap\_prdm9 ---RQIYYFTCQVIRPGCELLVWYGD  
Bflo\_prdm7\_9 ---RNIYYTYRPIPPGTELLVWYGN  
Lgig\_prdm7\_9 ---GRIYYTFKTIIPGSELVWYGN  
Pdum-prdm7\_9a ---GNIYYTTFMPEQSCCELLVWYGD  
Nvec\_prdm7\_9 ---GDIYYSYKDIHPGTELLVWYGD  
Aque\_prdm7\_9 ---GRIYYTFKDIOPGTELLVWYGD  
Hsap\_prdm8 ---GDIYYFSLRRIAKDELLVWYCK  
Pdum\_prdm8 ---GDIHYVALHNIPTNRELFVWYSP  
Smar\_prdm8 ---GRIYFETTRIPVKTDELLVWYGT  
Mley\_prdm8 ---GGQIYYTYRPIATGTELLVWYGD  
Hsap\_prdm10 ---HIVYYTTRKNIPEKQELKVVYSA  
Hsap\_prdm15 ---SDIYYFTTSDIPPGTELLVWYAA  
Bflo\_prdm10\_15 ---NEIYYTTRKPIEERQELKVVYST  
Lgig\_prdm10\_15 ---QDIYYTVKNIPEARQELKVVYSA  
Pdum\_prdm10\_15 ---SEIYYCTTRHIOERVELKVVYSA  
Smar\_prdm10\_15a ---QSIYYFTTCHYRTELKVVYSQ  
Hsap\_prdm11 ---EIIYYFACDIRPGEELRVWYS  
Hsap\_prdm12 ---TSIYYKALEMIPEDQELLVWYGN  
Bflo\_prdm12 ---EIIYYKAKAIPDELLVWYRF  
Lgig\_prdm12 ---HNIYYKAKDIAPQKELLVWYGS  
Pdum\_prdm12 ---TEIYYKAKNIPEEELLVWYNE  
Smar\_prdm12 -----NIPENOELLVWYGT  
Nvec\_prdm12 ---GNIYYKAKDIPEDQELLVWYGG  
Aque\_prdm12 ---ERVIYFRAVDIQLGEBLLVWYDK  
Hsap\_prdm13 ---GDIYYVALRDVQEGEBLLVWYSN  
Hsap\_prdm14 ---GDIYYESCKEIHQNOELLVWYGD  
Bflo\_prdm14 ---GDIYYBACKIIPQGAELLVWYGD  
Lgig\_prdm14a ---DEVIYYVATDISPGEELLVWYGO  
Lgig\_prdm14b ---GDIYYEVCKDIPQTELLVWYGO  
Pdum\_prdm14 ---DLIYYBACKDIPQTELLVWYGO  
Nvec\_prdm14a ---SDIYYBACDIYRGAELLVWYGS  
Nvec\_prdm14b ---KNIYYMATKIAIGEBLLTYGG  
Nvec\_prdm14c ---GDIYYDACDIIRGBELLVWYGP  
Nvec\_prdm14d ---NEIYYDVTKDIYEGTELLVWYGD  
Bflo\_prdmX ---GKIYYFESVCHIRRELLVWYSO  
Smar\_prdmX1 ---GRIYYVTHDITAGSELFWYSE  
Aque\_prdmX1 ---RNIYYLTIKPIGEPGAELLVWYGD  
Aque\_prdmX2 ---RNIYYMTIKPIHESSELVWYGD

F/Y switch AdoMet and target Lys  
\* \*

-----c'-------Block c-

**Supplementary Figure S1: Multiple alignment of the SET domain of Prdm and non-Prdm proteins.**

Four conserved blocks of sequence are indicated – blocks *a*, *b* and *c* are indicated as in Dillon et al. (2005) and Hohenauer and Moore (2012). Conservation extends around these blocks, defining the *a'*, *b'* and *c'* blocks. Important functional residues and motifs discussed in Supplementary Text 1 are indicated. Underlined asterisks in block *b* indicate the position of the N-H motif discussed in Supplementary Text 1.

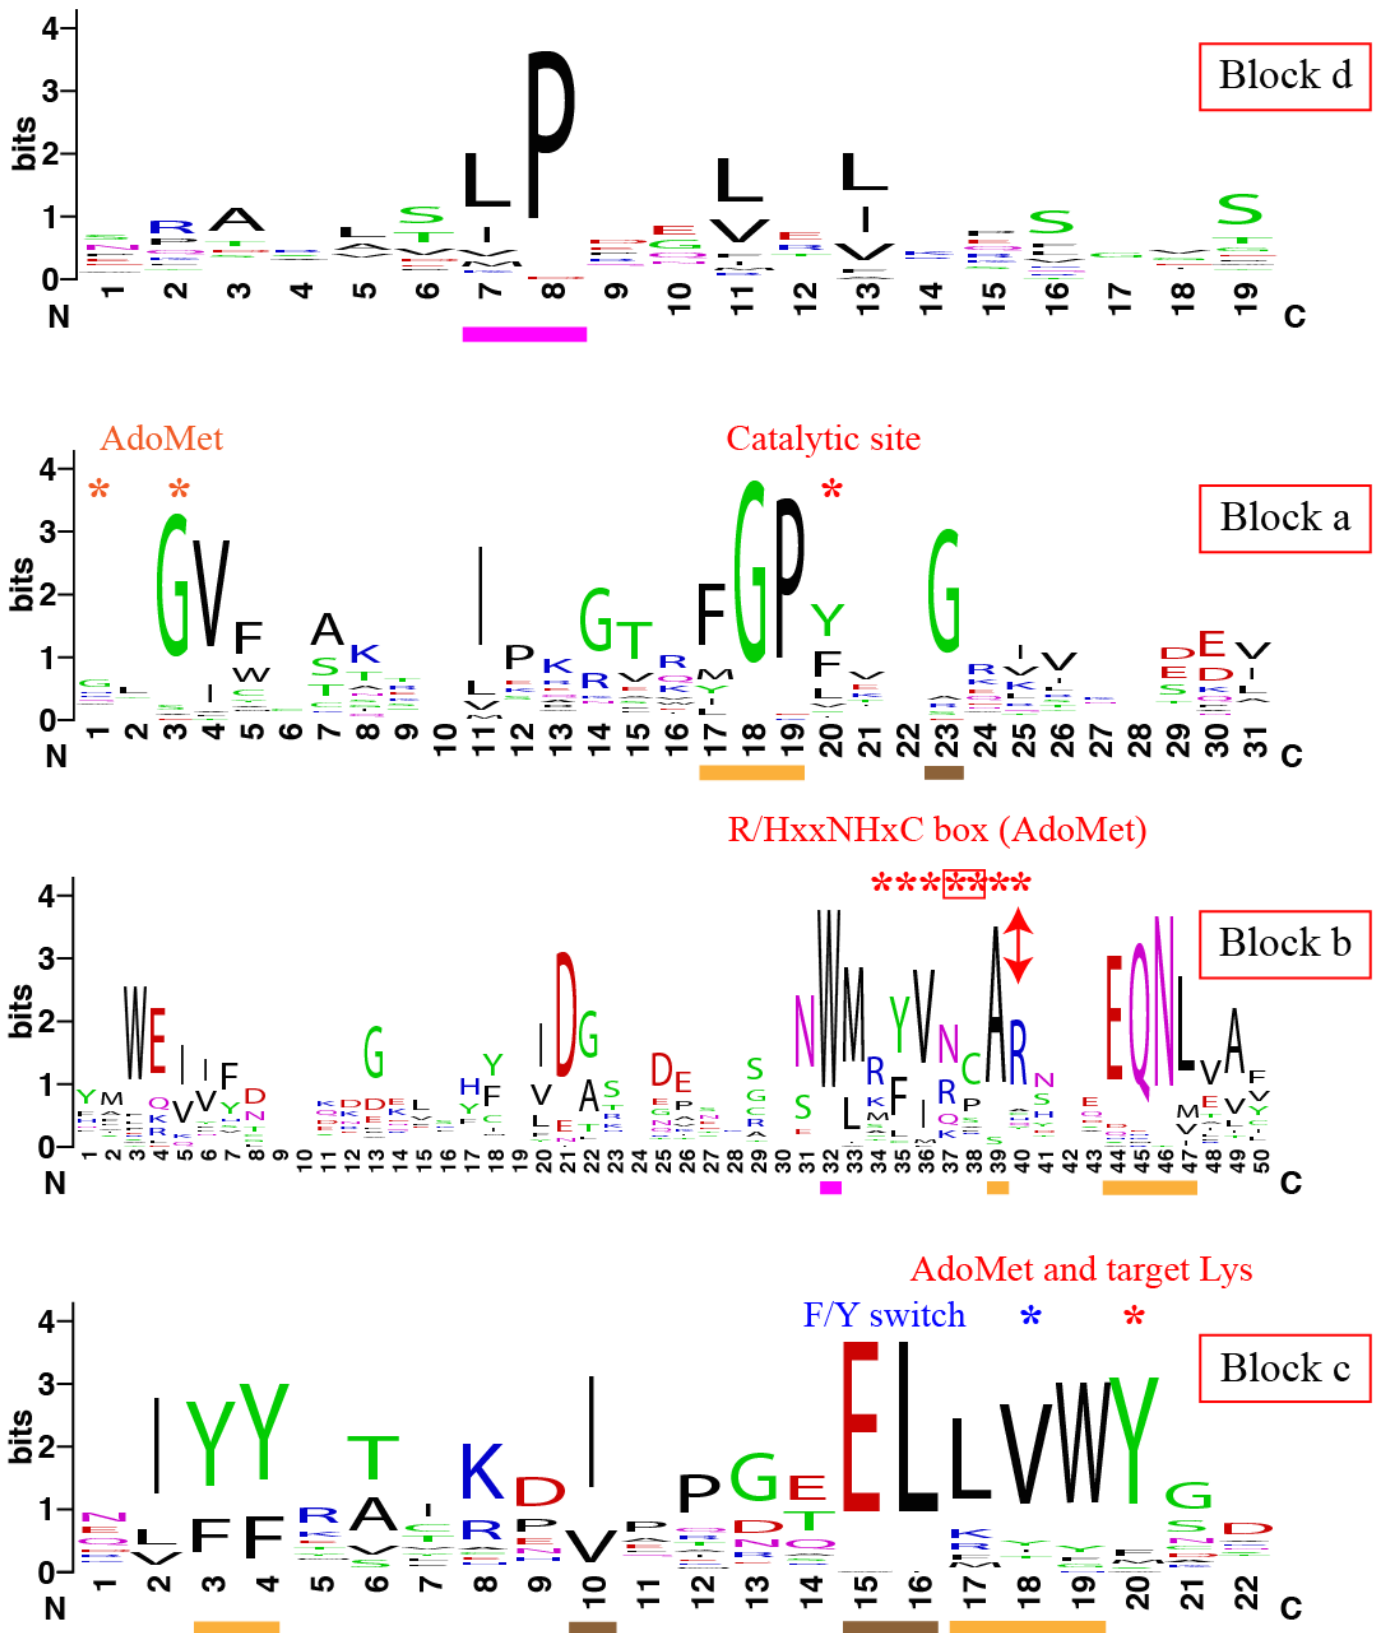

**Supplementary Figure S2: Conserved regions in the SET domain of Prdm proteins.** Sequence logos have been generated (with WebLogo) from multiple alignments of the four conserved blocks defined in Fig. S1. Only Prdm sequences were included in these multiple alignments. The red double arrow indicates a

position where a cysteine is found in most non-Prdm SET domains in block *b*. The two asterisks in a red box indicate the position of the N-H motif in block *b* discussed in Supplementary Text 1. The colored lines (pink, orange and brown) under the number of the residues correspond to the conserved residues and motifs described in Supplementary Text 1: brown for residues strongly conserved in most Prdm and non-Prdm proteins, pink for residues strongly conserved in most Prdm and a few non-Prdm proteins, and orange for residues well conserved in Prdm but not in non-Prdm proteins.

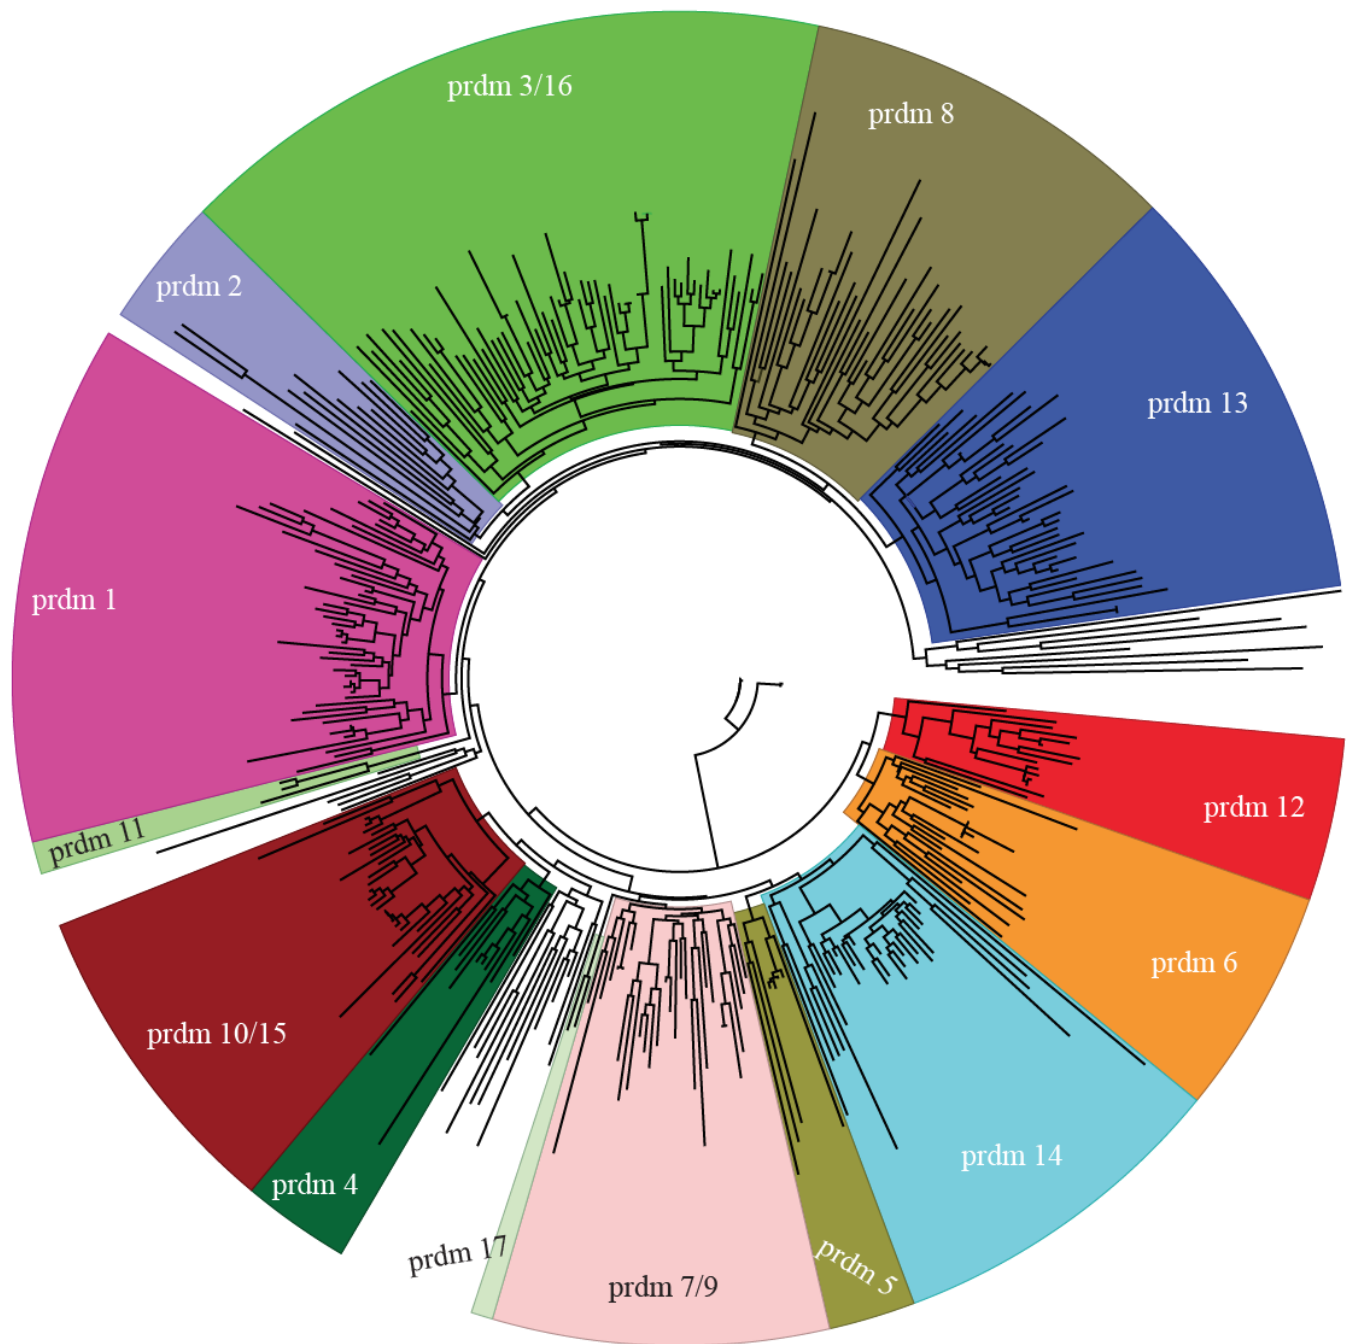

**Supplementary Figure S3: Phylogenetic analysis of *Prdm* genes.** An unrooted Maximum-likelihood (ML) tree is shown. See Table S7 for the statistical support of the different monophyletic groups. Colored monophyletic groups correspond to the *Prdm* subfamilies listed in Tables 1 and S1. Uncolored parts of the tree correspond to ‘orphan’ genes.

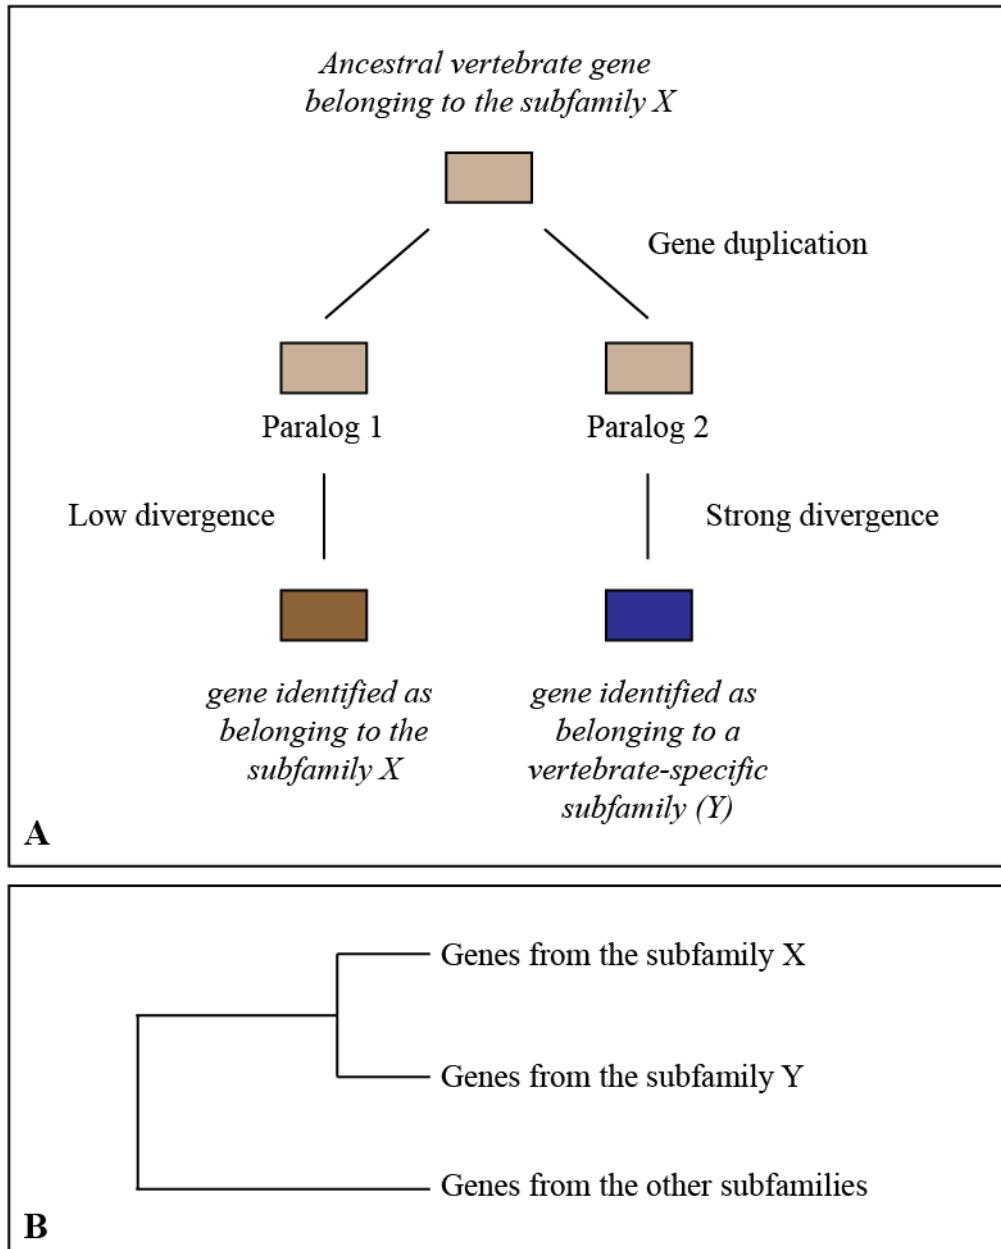

**Supplementary Figure S4: Origin of the vertebrate specific subfamilies.** (A) A model for the origin of the vertebrate specific subfamilies through gene duplication. (B) Expected phylogenetic tree in the case of the model described in (A).



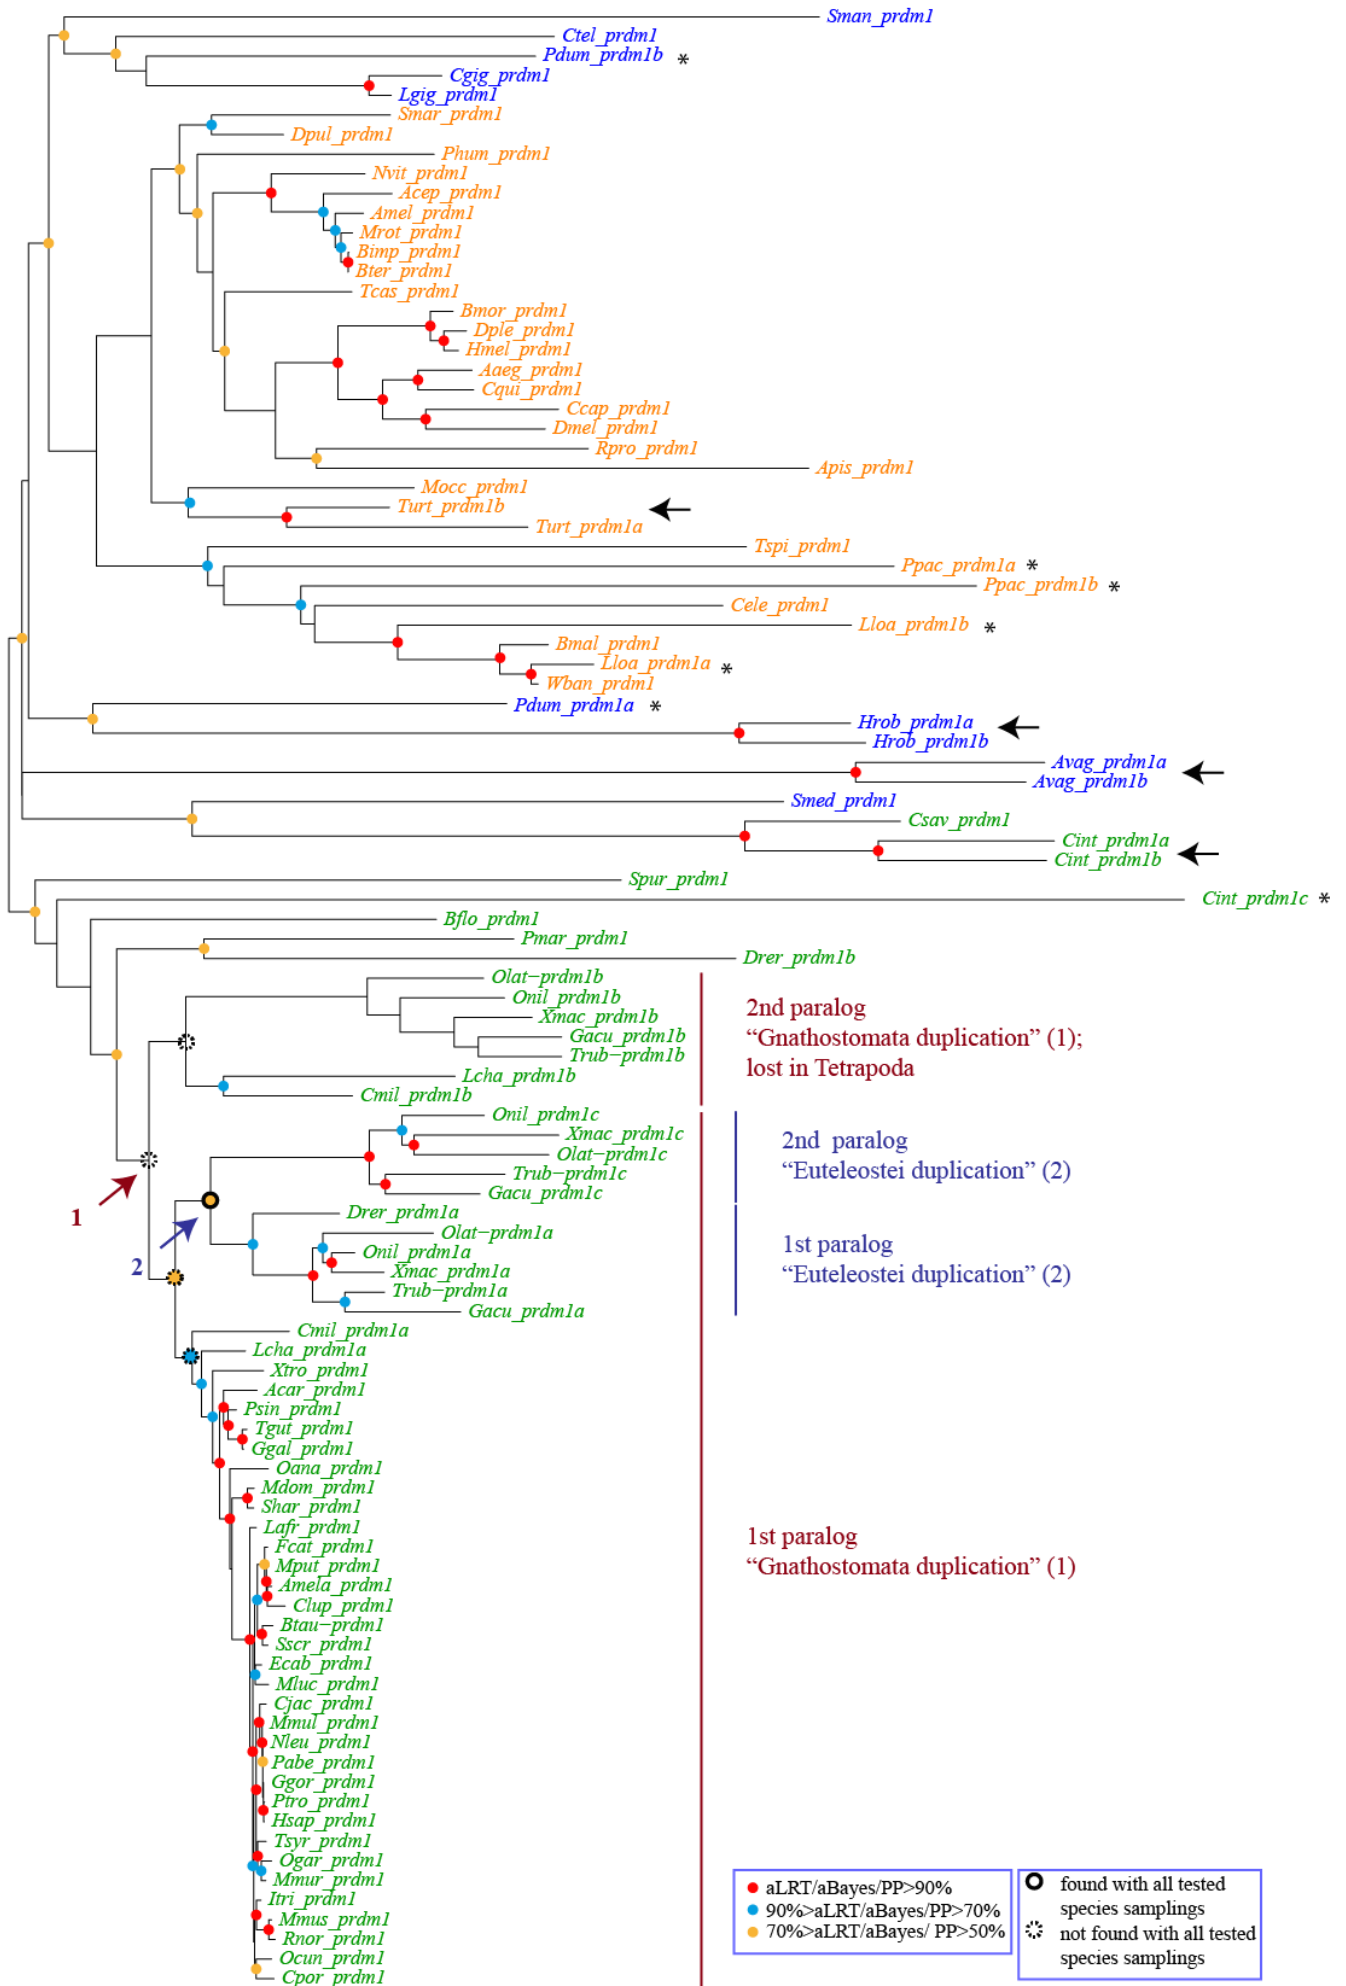

**Supplementary Figure S5: Phylogenetic analysis of the Prdm1 subfamily.** A Maximum-likelihood (ML) tree is shown. Midpoint rooting has been used. A similar tree topology has been obtained by Bayesian inference (BI). Statistical supports (aLRT and aBayes values for ML; posterior probabilities, PP, for BI) are indicated on the nodes by color circles (color code is indicated in the figure). Nodes without color circles are not statistically supported and/or not found by both ML and BI methods. Species names are abbreviated using the first letter of the genus name followed by the three first letters of the species name. All abbreviations can be found in Table 1. Black arrows indicate pairs of paralogs that are closely related in the phylogenetic tree, whereas asterisks denotes paralogs that are not closely associated in the phylogenetic tree. Duplications that likely occurred in Gnathostomata and Euteleostei are indicated (red and purple arrows respectively). Monophyletic groups that allowed to position these duplications are also highlighted. Some but not all these monophyletic groups are also found in ML trees constructed with several different species samplings (sampling 1 : all sequences minus sequences that appear the most divergent in the multiple alignment and phylogenetic tree, *i.e.*, *Cint\_prdm1C*, *Sman\_prdm1*, *Smed\_prdm1*, *Avag\_prdm1a*, *Avag\_prdm1b*, *Hrob\_prdm1a*, *Hrob\_prdm1b*, and *Pdum\_prdm1a* ; sampling 2 : only deuterostome genes ; sampling 3 : only chordate genes ; sampling 4 : only chordate genes minus *Pmar\_prdm1*, *Drer\_prdm1b*, and *Cint\_prdm1c*).

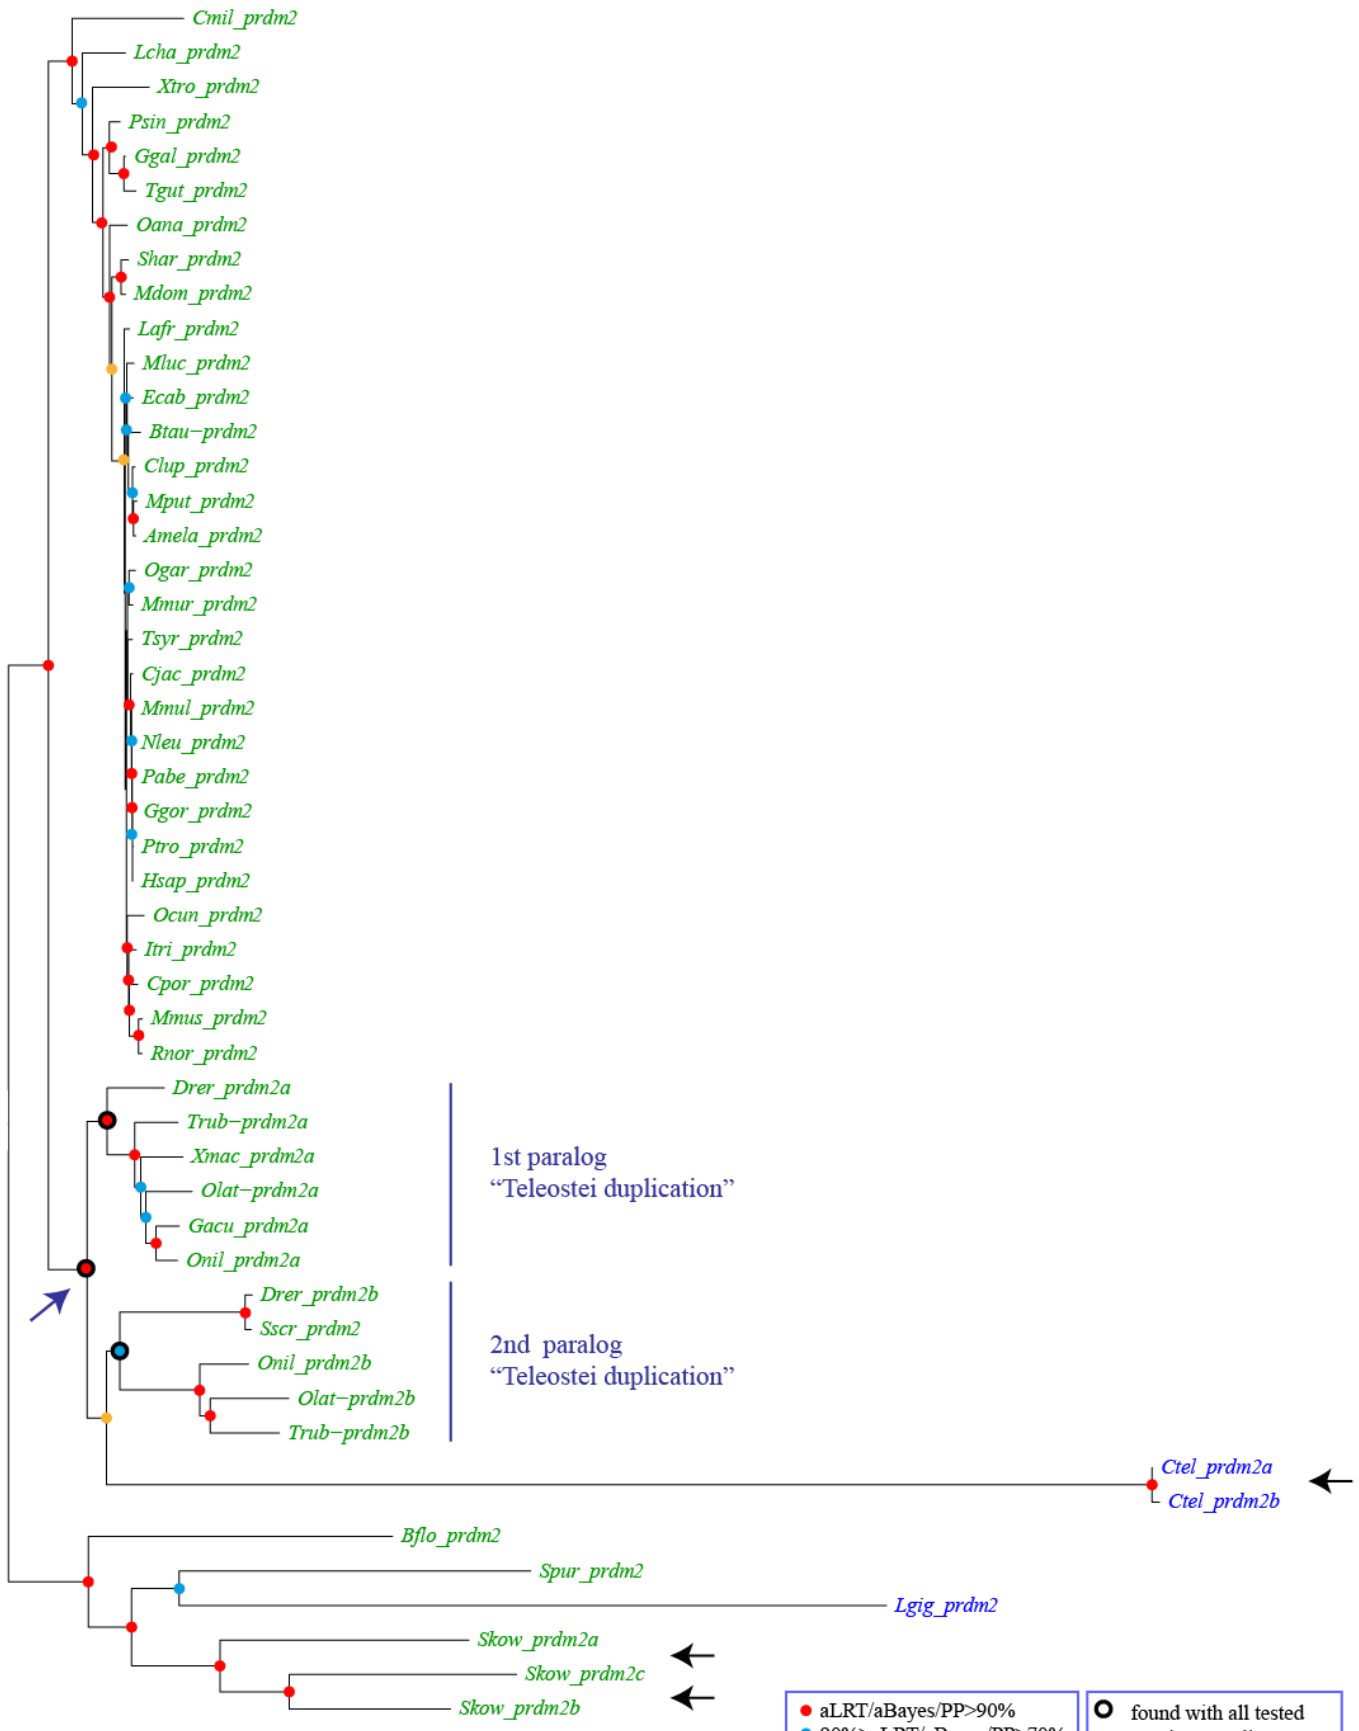

**Supplementary Figure S6: Phylogenetic analysis of the Prdm2 subfamily.** A ML tree is shown. Midpoint rooting has been used. A similar tree topology has been obtained by BI. Legend is as in Supplementary Fig. S5. A duplications that likely took place in Teleostei is indicated (purple arrow). Monophyletic groups that allowed to position this duplication are also highlighted. These monophyletic groups are also found in ML trees constructed with several different species samplings (sampling 1: only deuterostome genes; sampling 2: only chordate genes; sampling 3: only vertebrate genes).

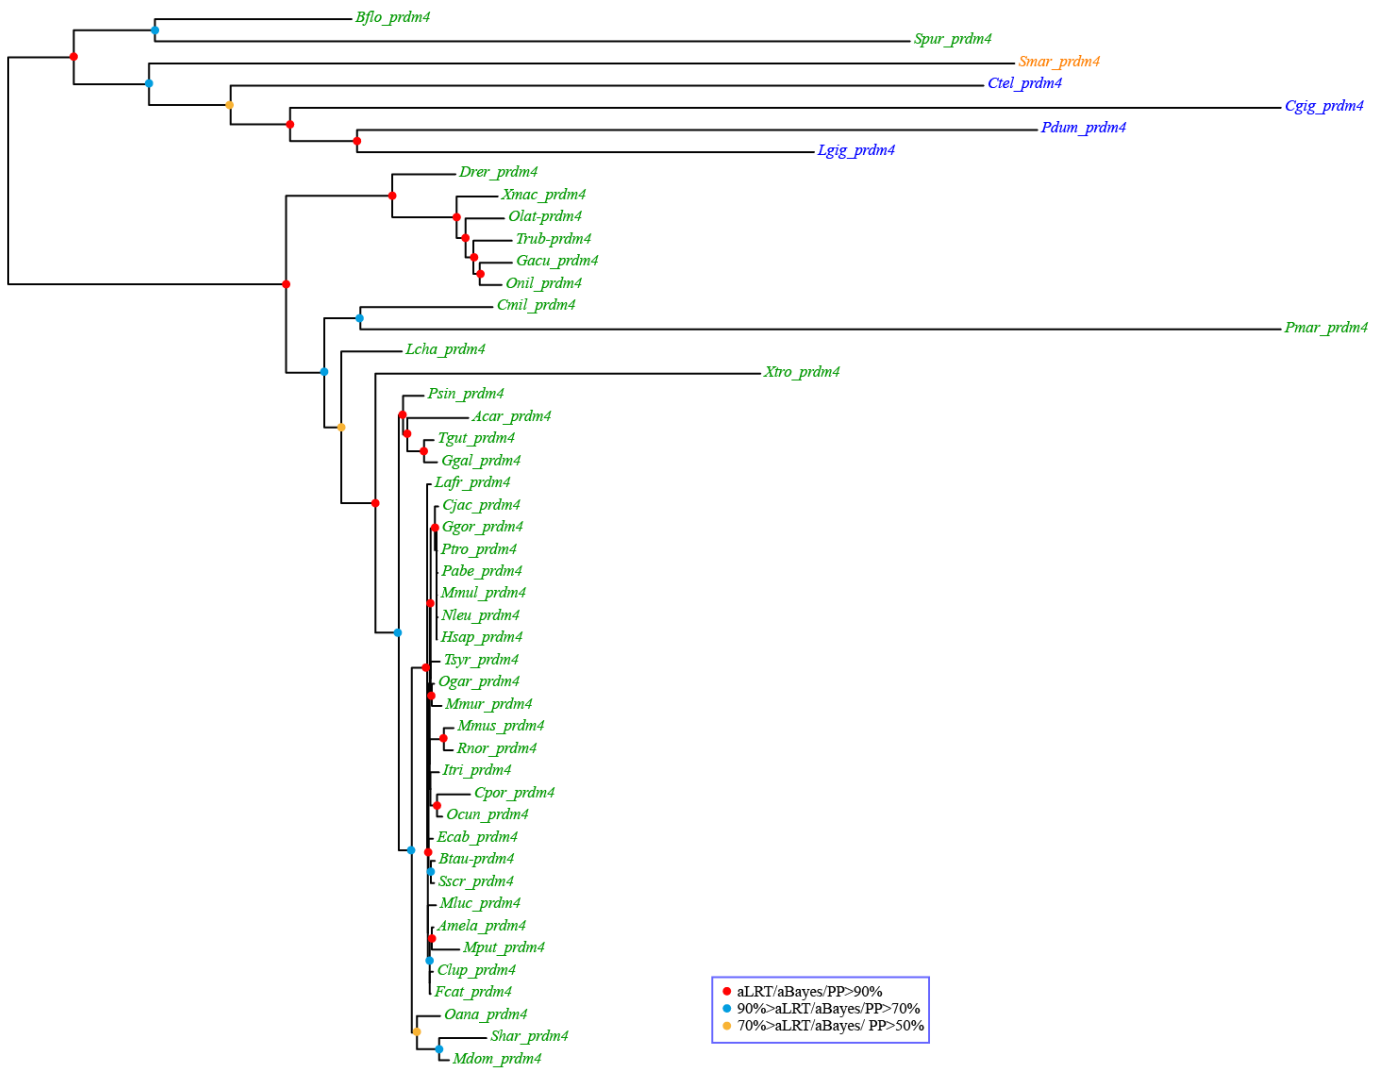

**Supplementary Figure S7: Phylogenetic analysis of the Prdm4 subfamily.** A ML tree is shown. Midpoint rooting has been used. A similar tree topology has been obtained by BI. Legend is as in Supplementary Fig. S5.

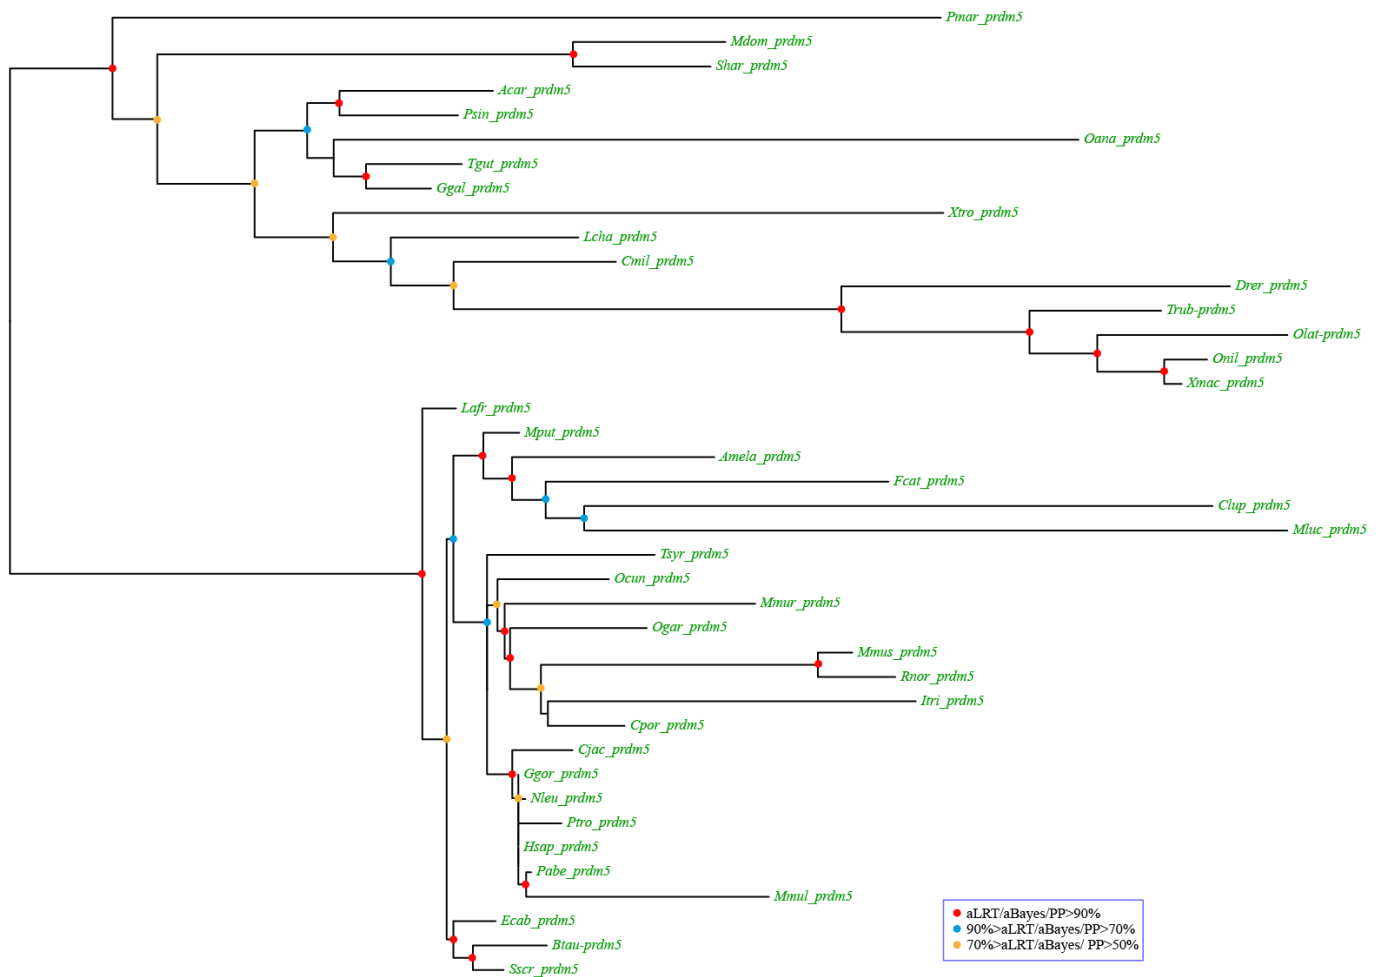

**Supplementary Figure S8: Phylogenetic analysis of the Prdm5 subfamily.** A ML tree is shown. Midpoint rooting has been used. A similar tree topology has been obtained by BI. Legend is as in Supplementary Fig. S5.

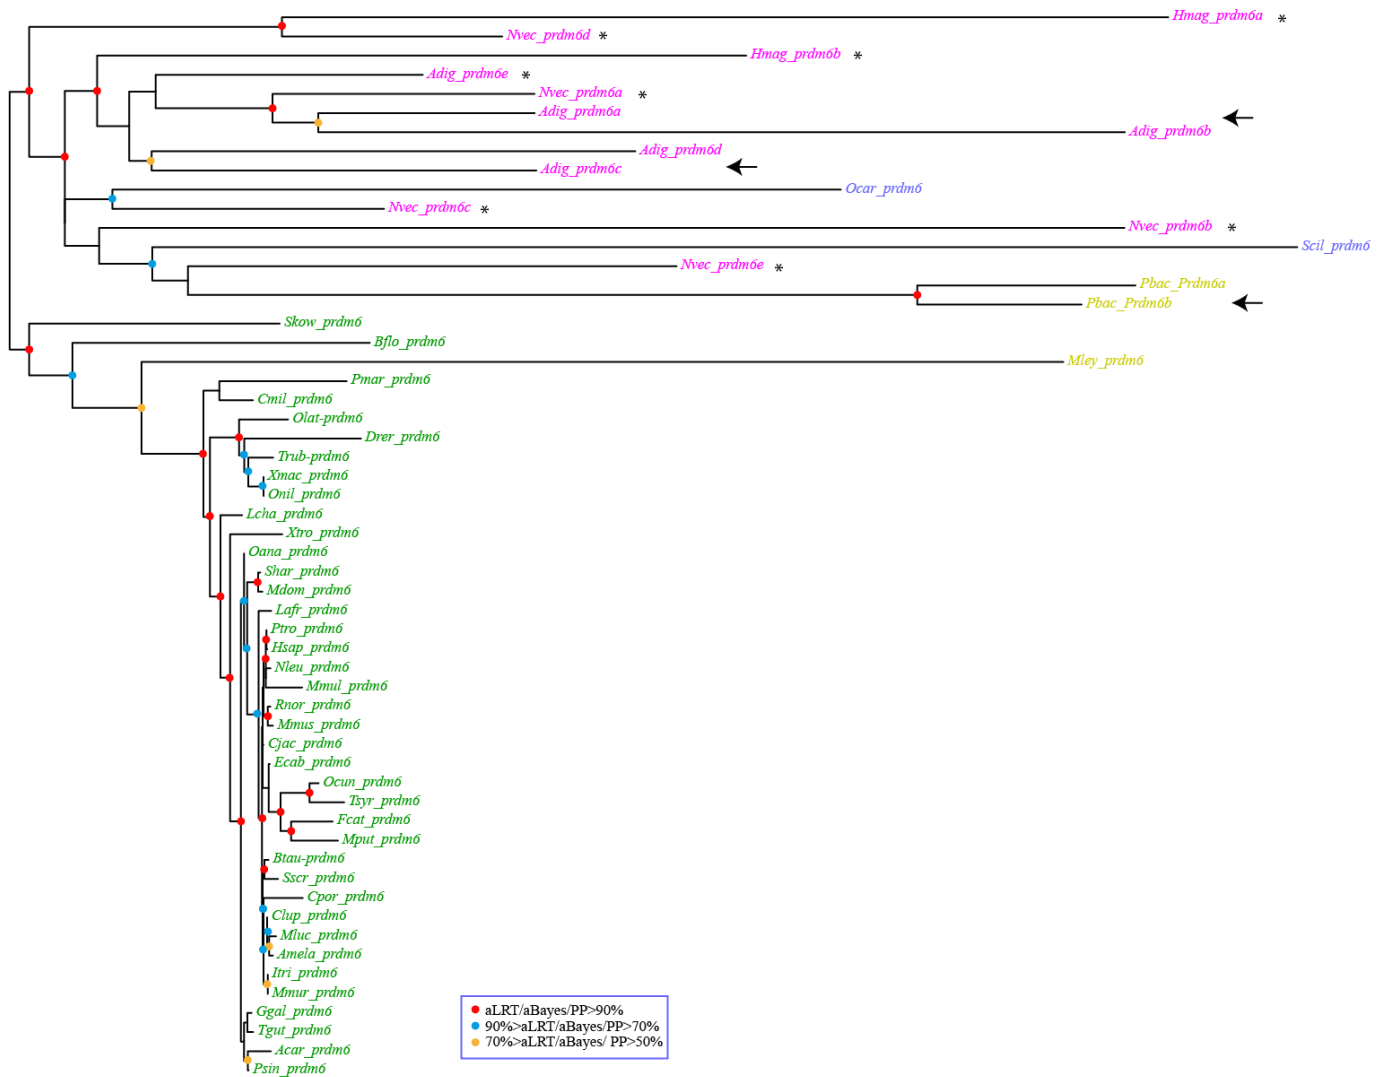

**Supplementary Figure S9: Phylogenetic analysis of the Prdm6 subfamily.** A ML tree is shown. Midpoint rooting has been used. A similar tree topology has been obtained by BI. Legend is as in Supplementary Fig. S5.

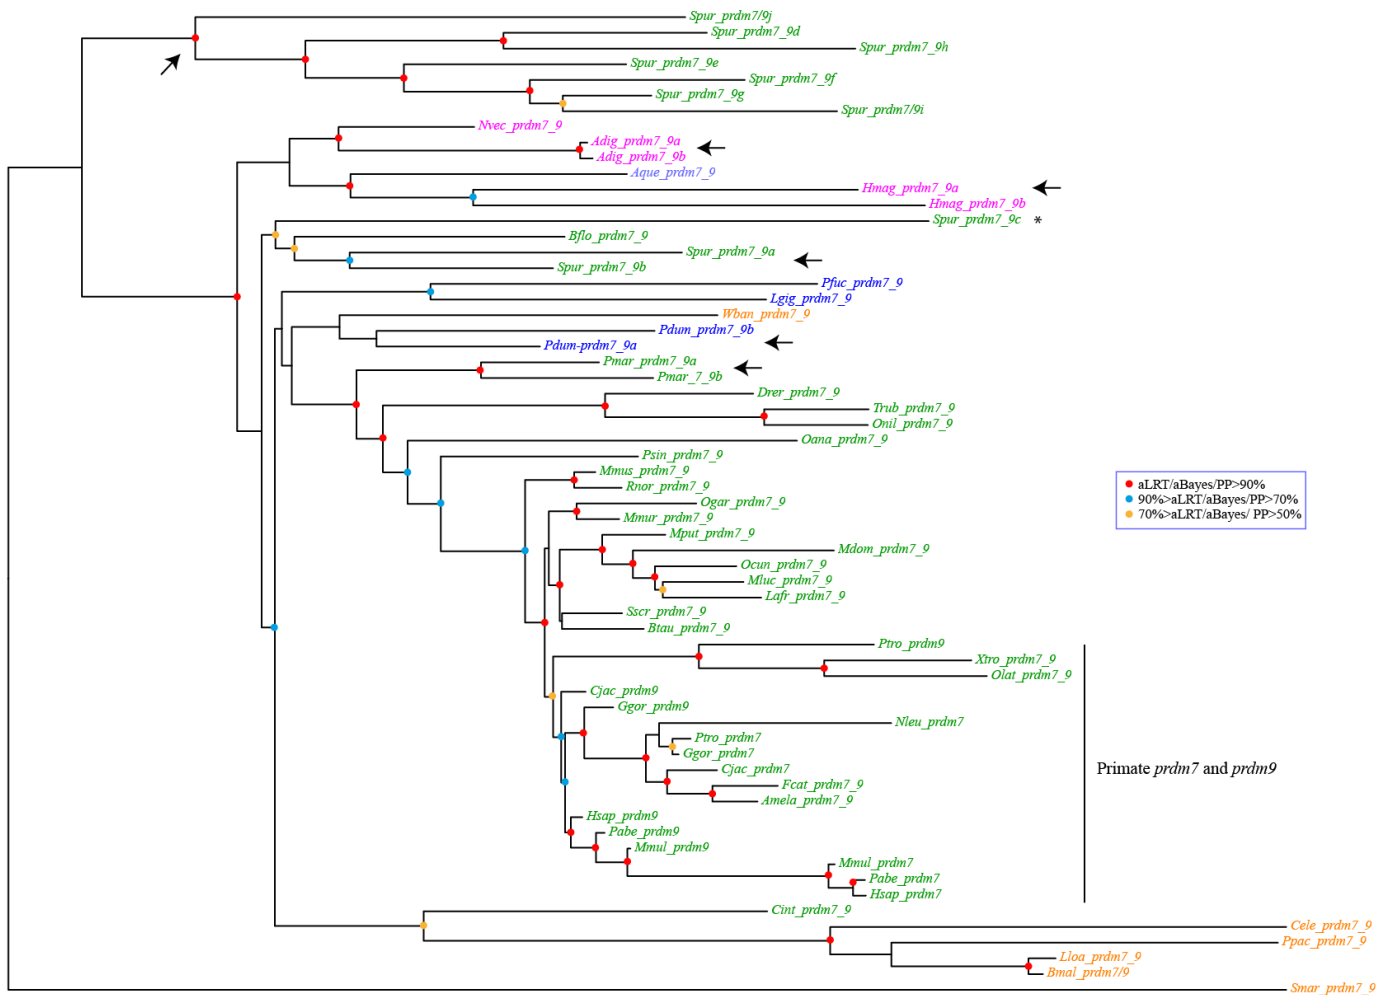

**Supplementary Figure S10: Phylogenetic analysis of the Prdm7/9 subfamily.** A ML tree is shown. Midpoint rooting has been used. A similar tree topology has been obtained by BI. Legend is as in Supplementary Fig. S5. To test the robustness of the tree, we constructed ML trees with several different species samplings (sampling 1: only deuterostome genes; sampling 2: only chordate genes; sampling 3: only vertebrate genes; sampling 4: only mammalian genes).



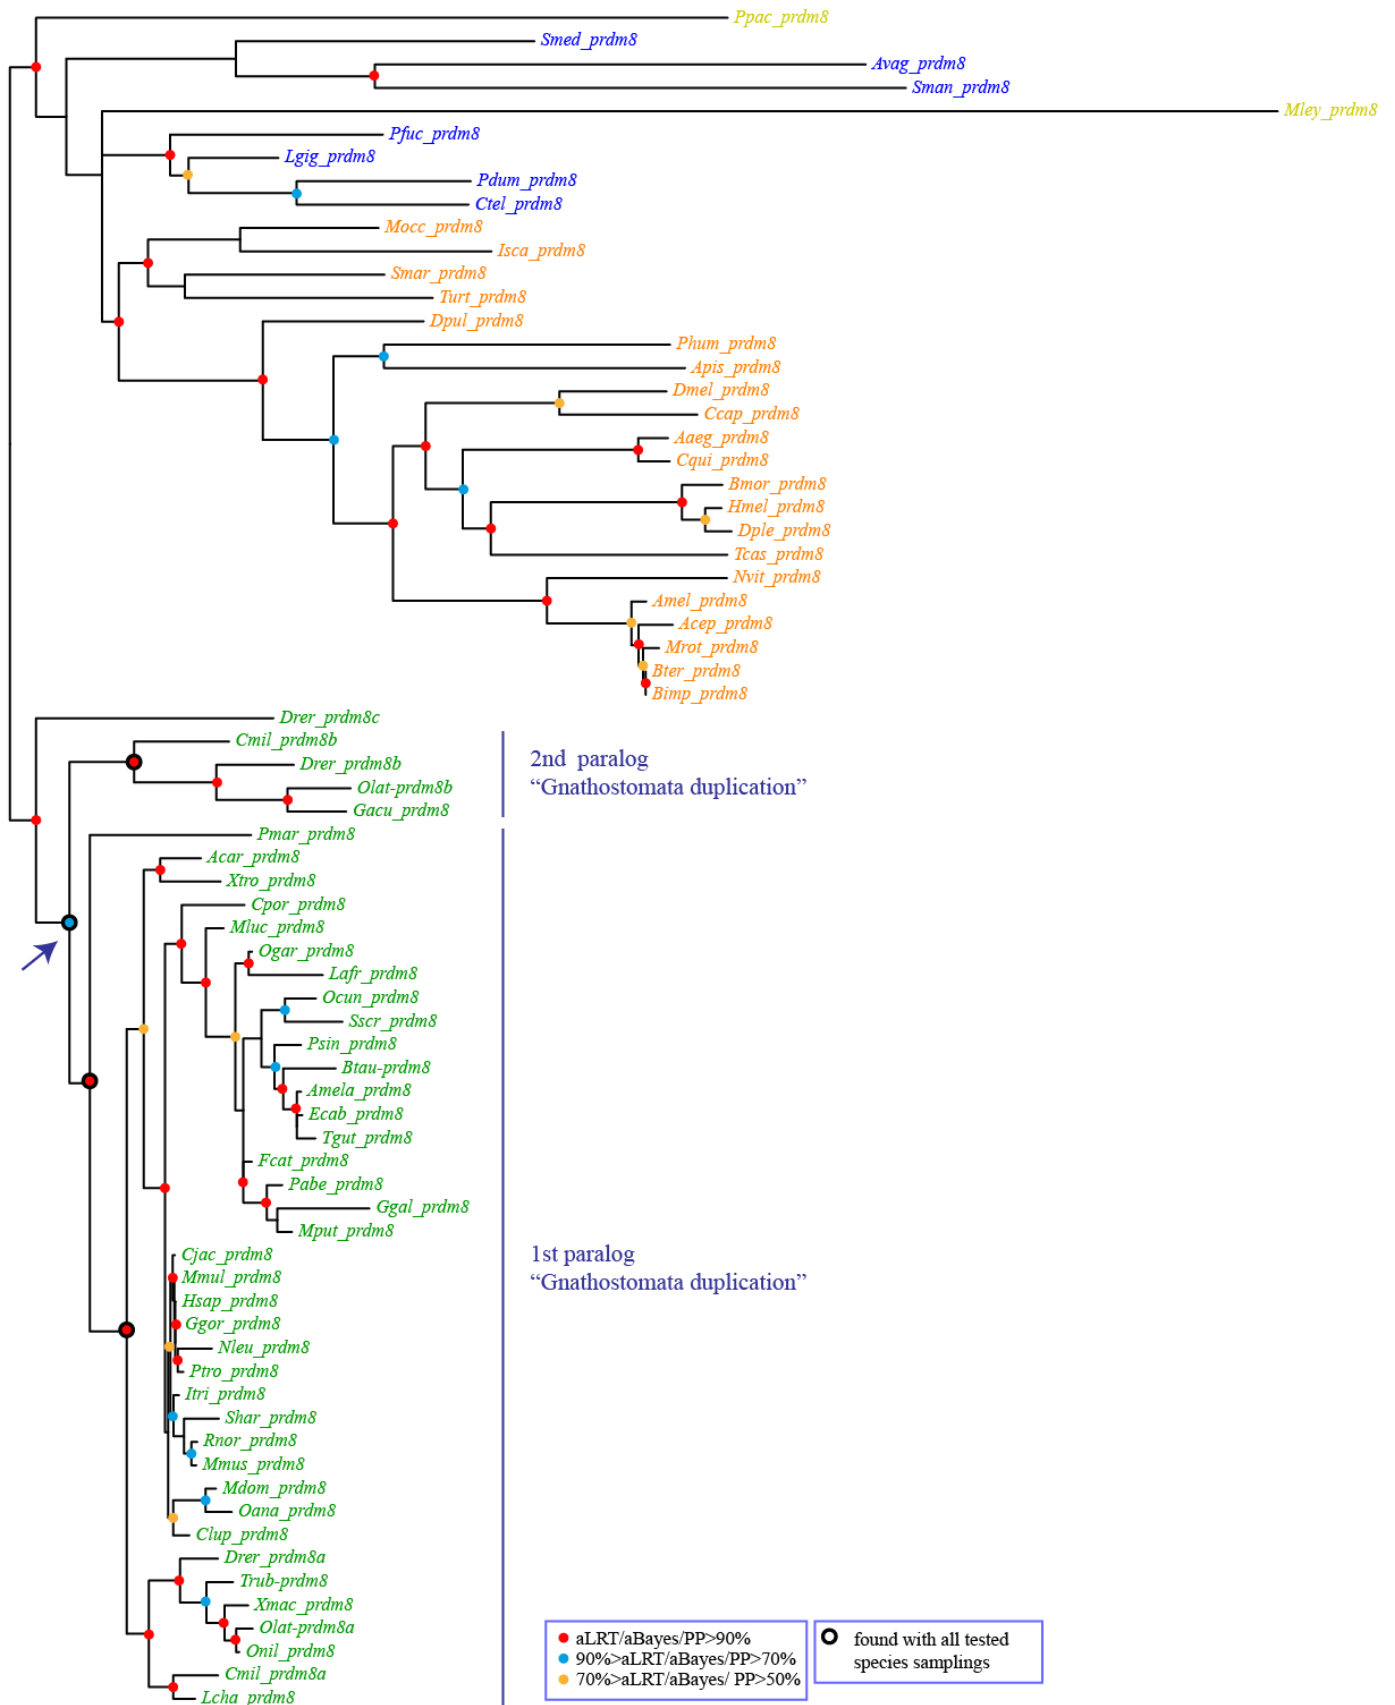

**Supplementary Figure S11: Phylogenetic analysis of the Prdm8 subfamily.** A ML tree is shown. Midpoint rooting has been used. A similar tree topology has been obtained by BI. Legend is as in

Supplementary Fig. S5. A duplications that likely took place in Gnathostomata is indicated (purple arrow). Monophyletic groups that allowed to position this duplication are also highlighted. These monophyletic groups are also found in ML trees constructed with several different species samplings (sampling 1: all sequences minus *Ppac\_prdm8*, *Smed\_prdm8*, *Avag\_prdm8*, *Sman\_prdm8*, and *Mley\_prdm8*; sampling 2: only vertebrate genes; sampling 3: only vertebrate genes minus *Drer\_prdm8c*).

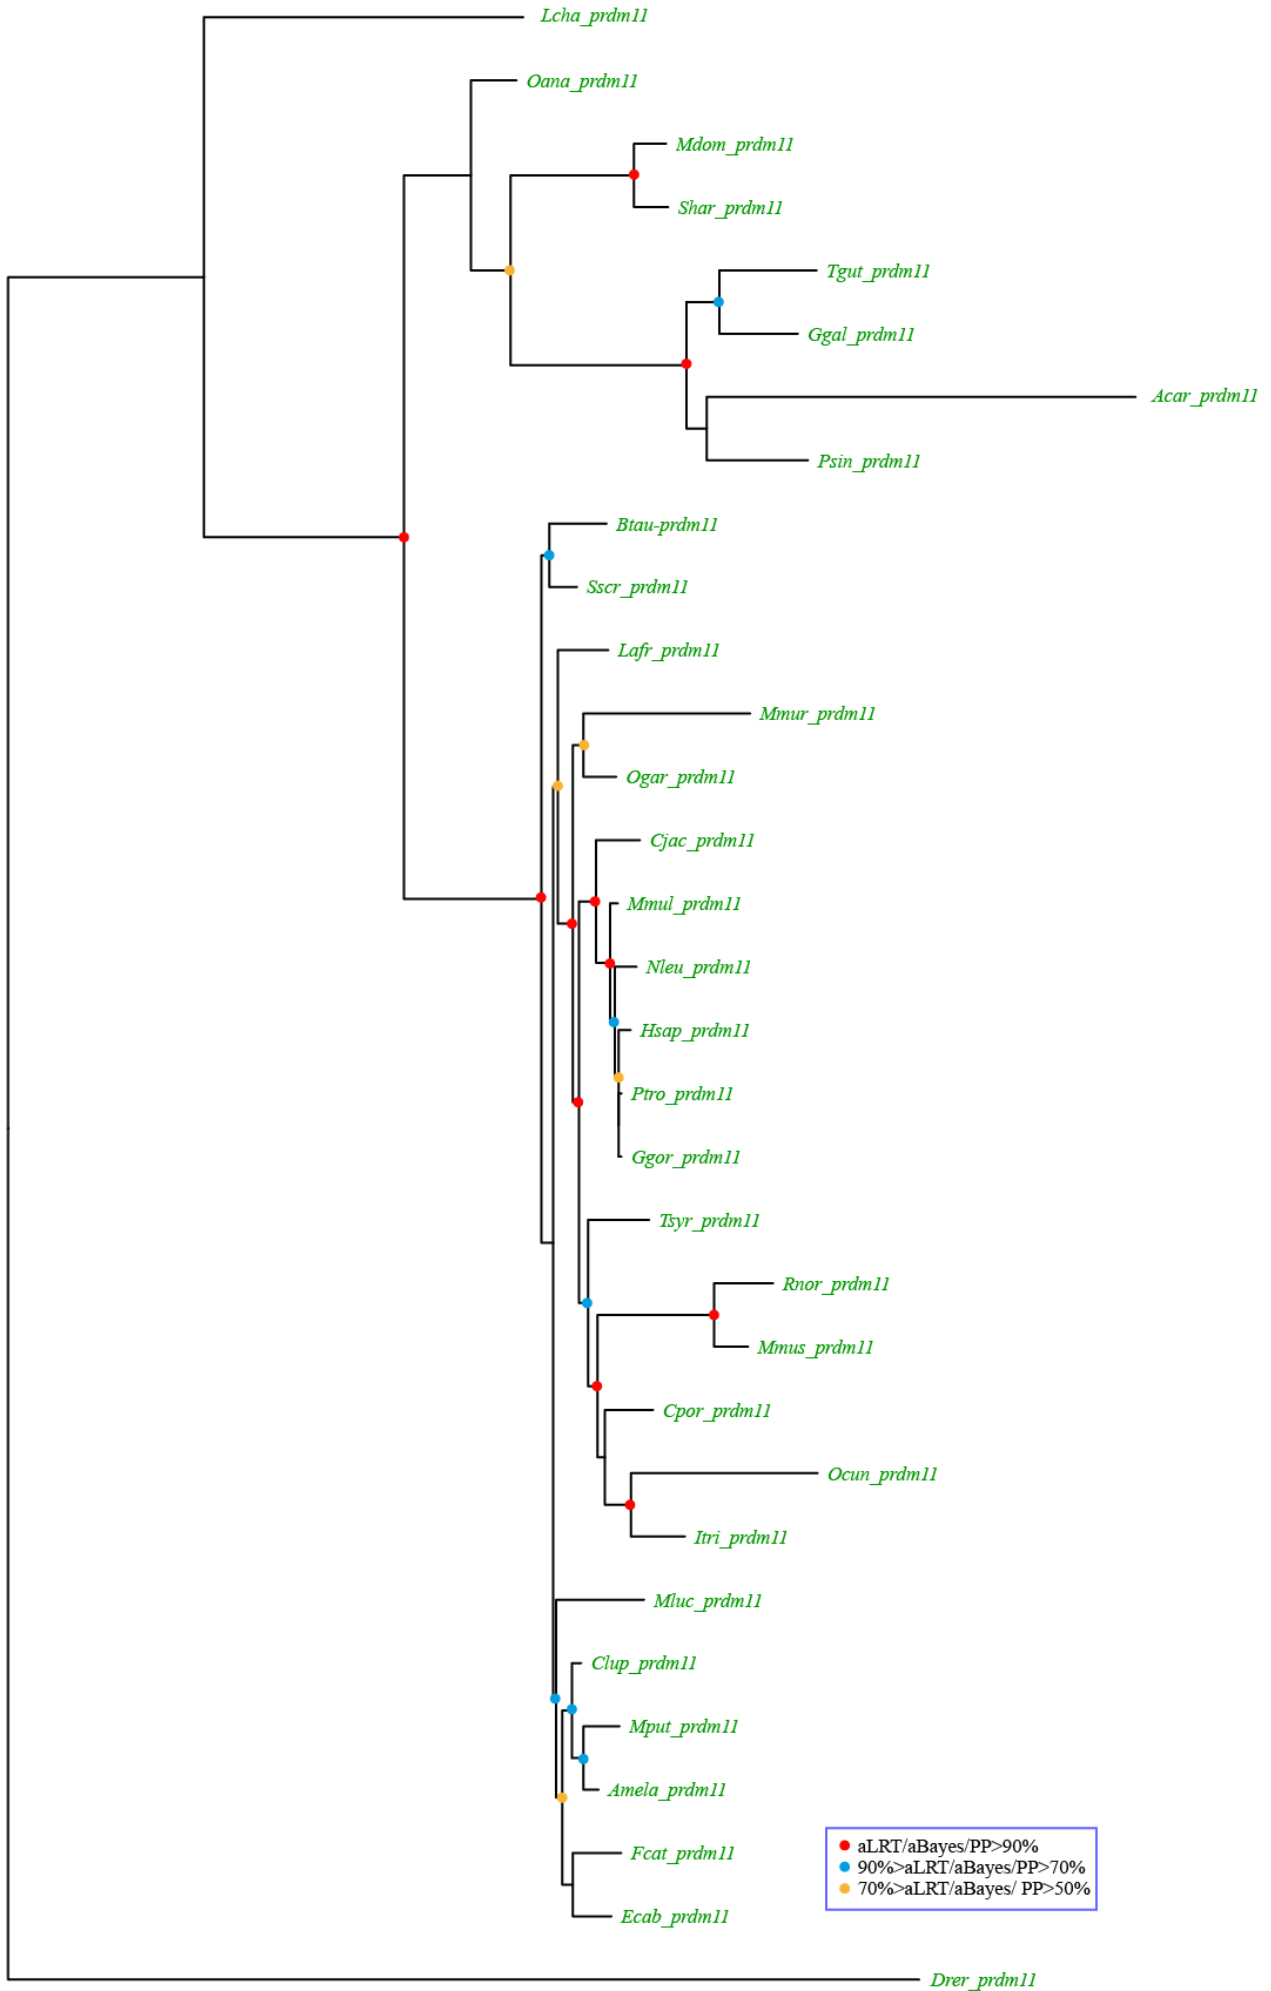

**Supplementary Figure S12: Phylogenetic analysis of the Prdm11 subfamily.** A ML tree is shown. Midpoint rooting has been used. A similar tree topology has been obtained by BI. Legend is as in Supplementary Fig. S5.

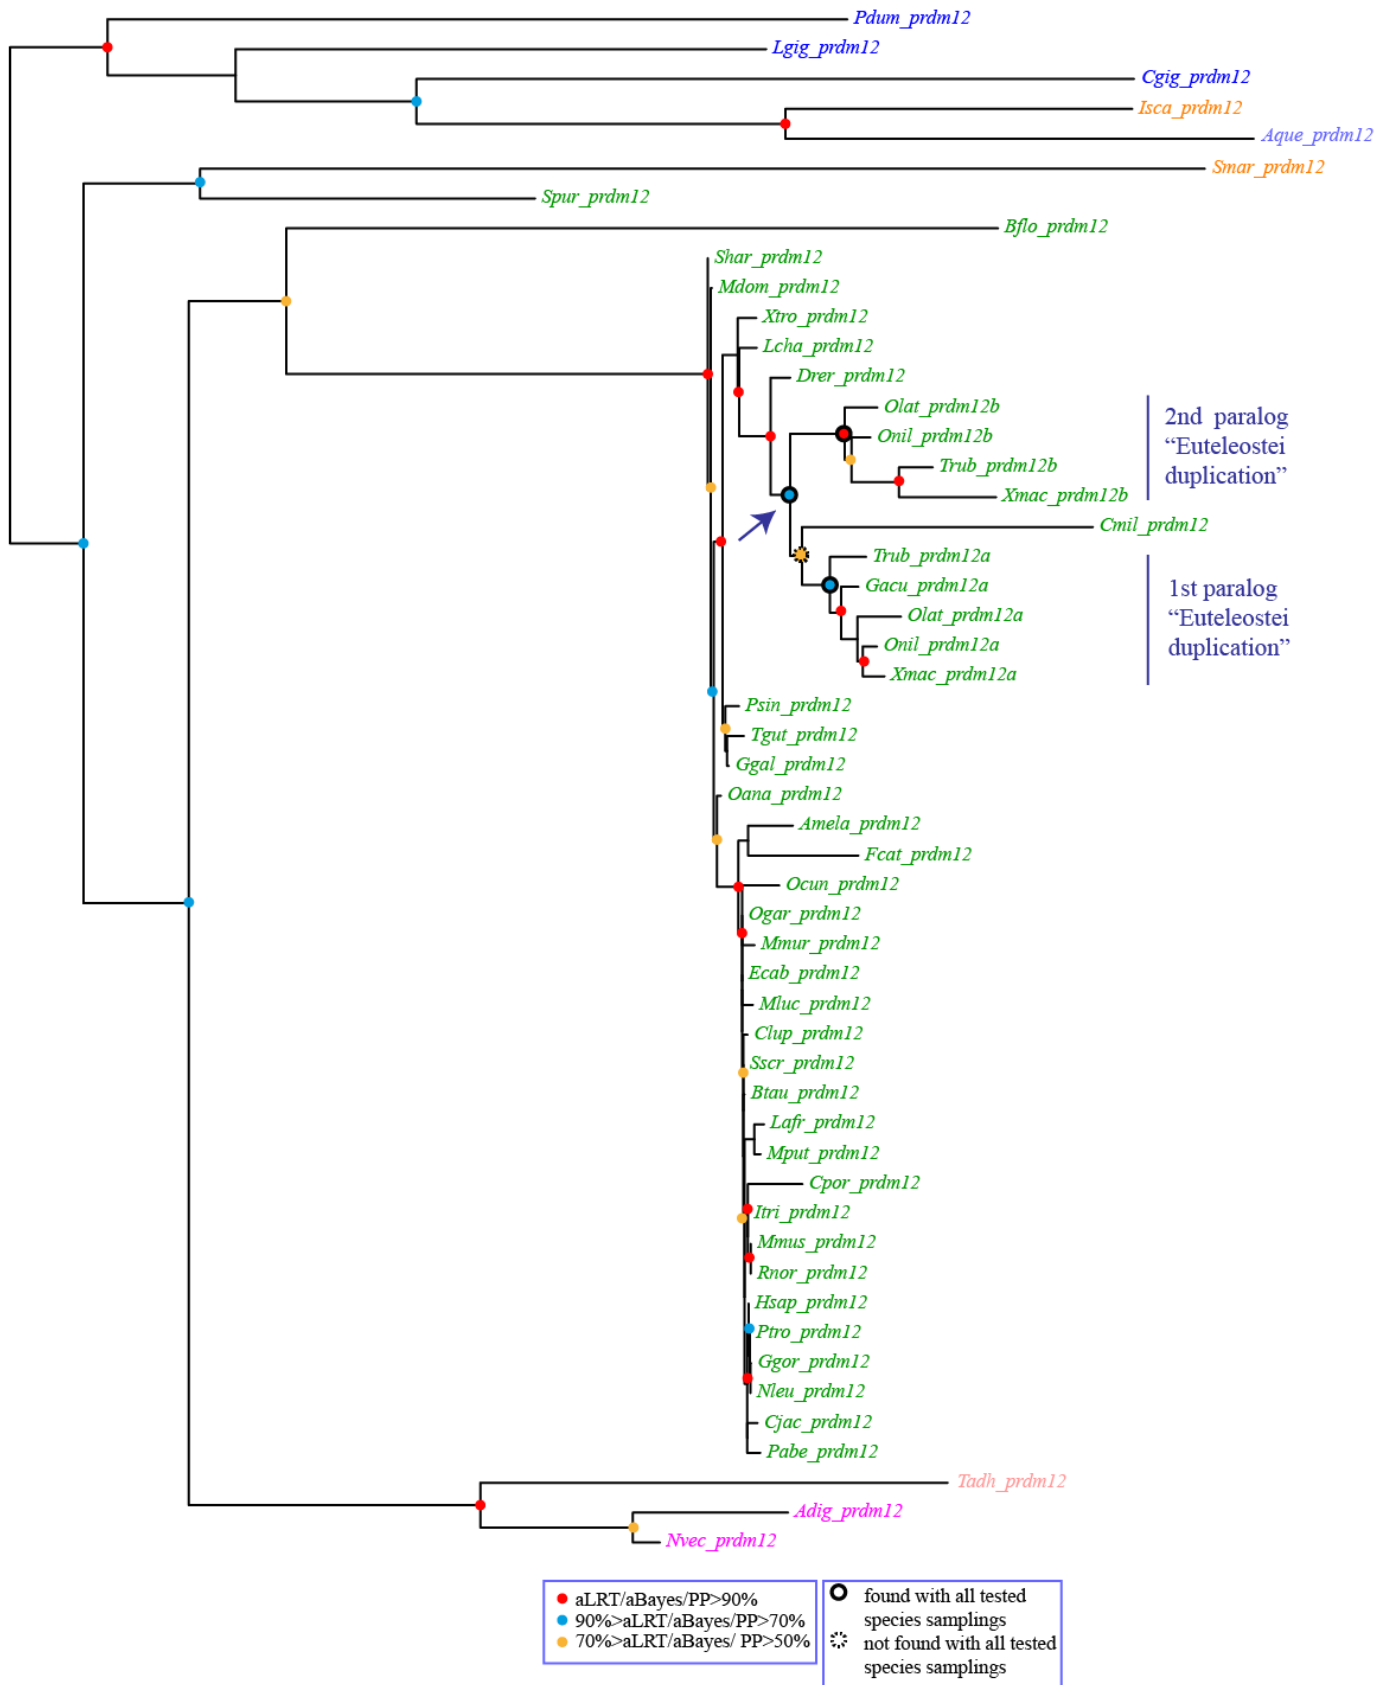

**Supplementary Figure S13: Phylogenetic analysis of the Prdm12 subfamily.** A ML tree is shown. Midpoint rooting has been used. A similar tree topology has been obtained by BI. Legend is as in

Supplementary Fig. S5. A duplications that likely occurred in Euteleostei is indicated (purple arrow). Monophyletic groups that allowed to position this duplication are also highlighted. An odd feature of the phylogenetic tree is the grouping of the single gene from *Callorhinchus* with the *Prdm12a* genes. In phylogenetic trees constructed with four different partial samplings of species (sampling 1: only deuterostome genes; sampling 2: only chordate genes; sampling 3: only vertebrate genes; sampling 4: only vertebrate genes minus *Cmil\_prdm12*), we found the same monophyletic groups for the teleost genes than in the tree constructed with the full dataset. The only difference is that the *Cmil\_prdm12* gene is found as outgroup to the teleost genes in the trees constructed with species samplings 1 to 3.

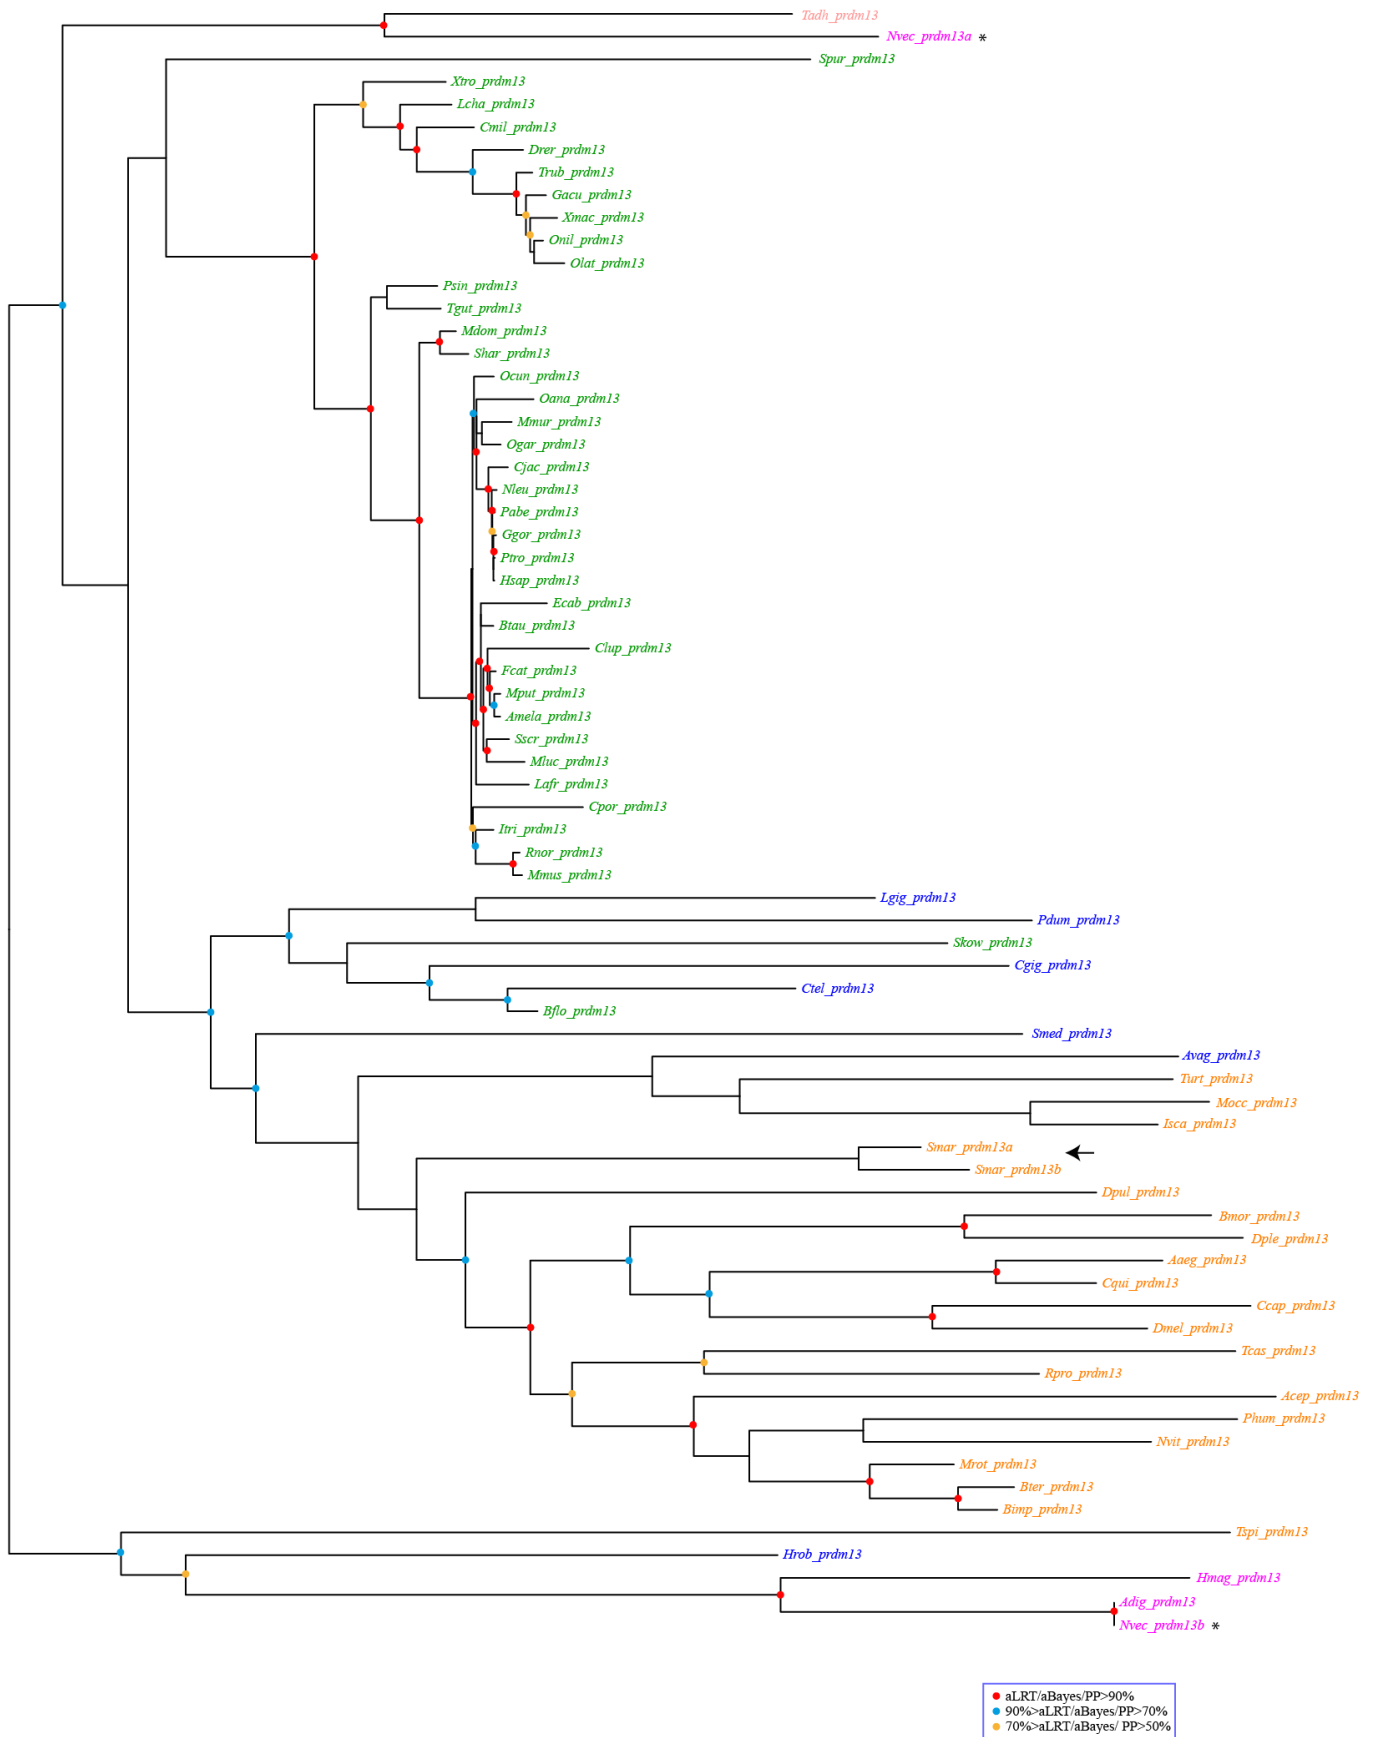

**Supplementary Figure S14: Phylogenetic analysis of the Prdm13 subfamily.** A ML tree is shown. Midpoint rooting has been used. A similar tree topology has been obtained by BI. Legend is as in Supplementary Fig. S5.

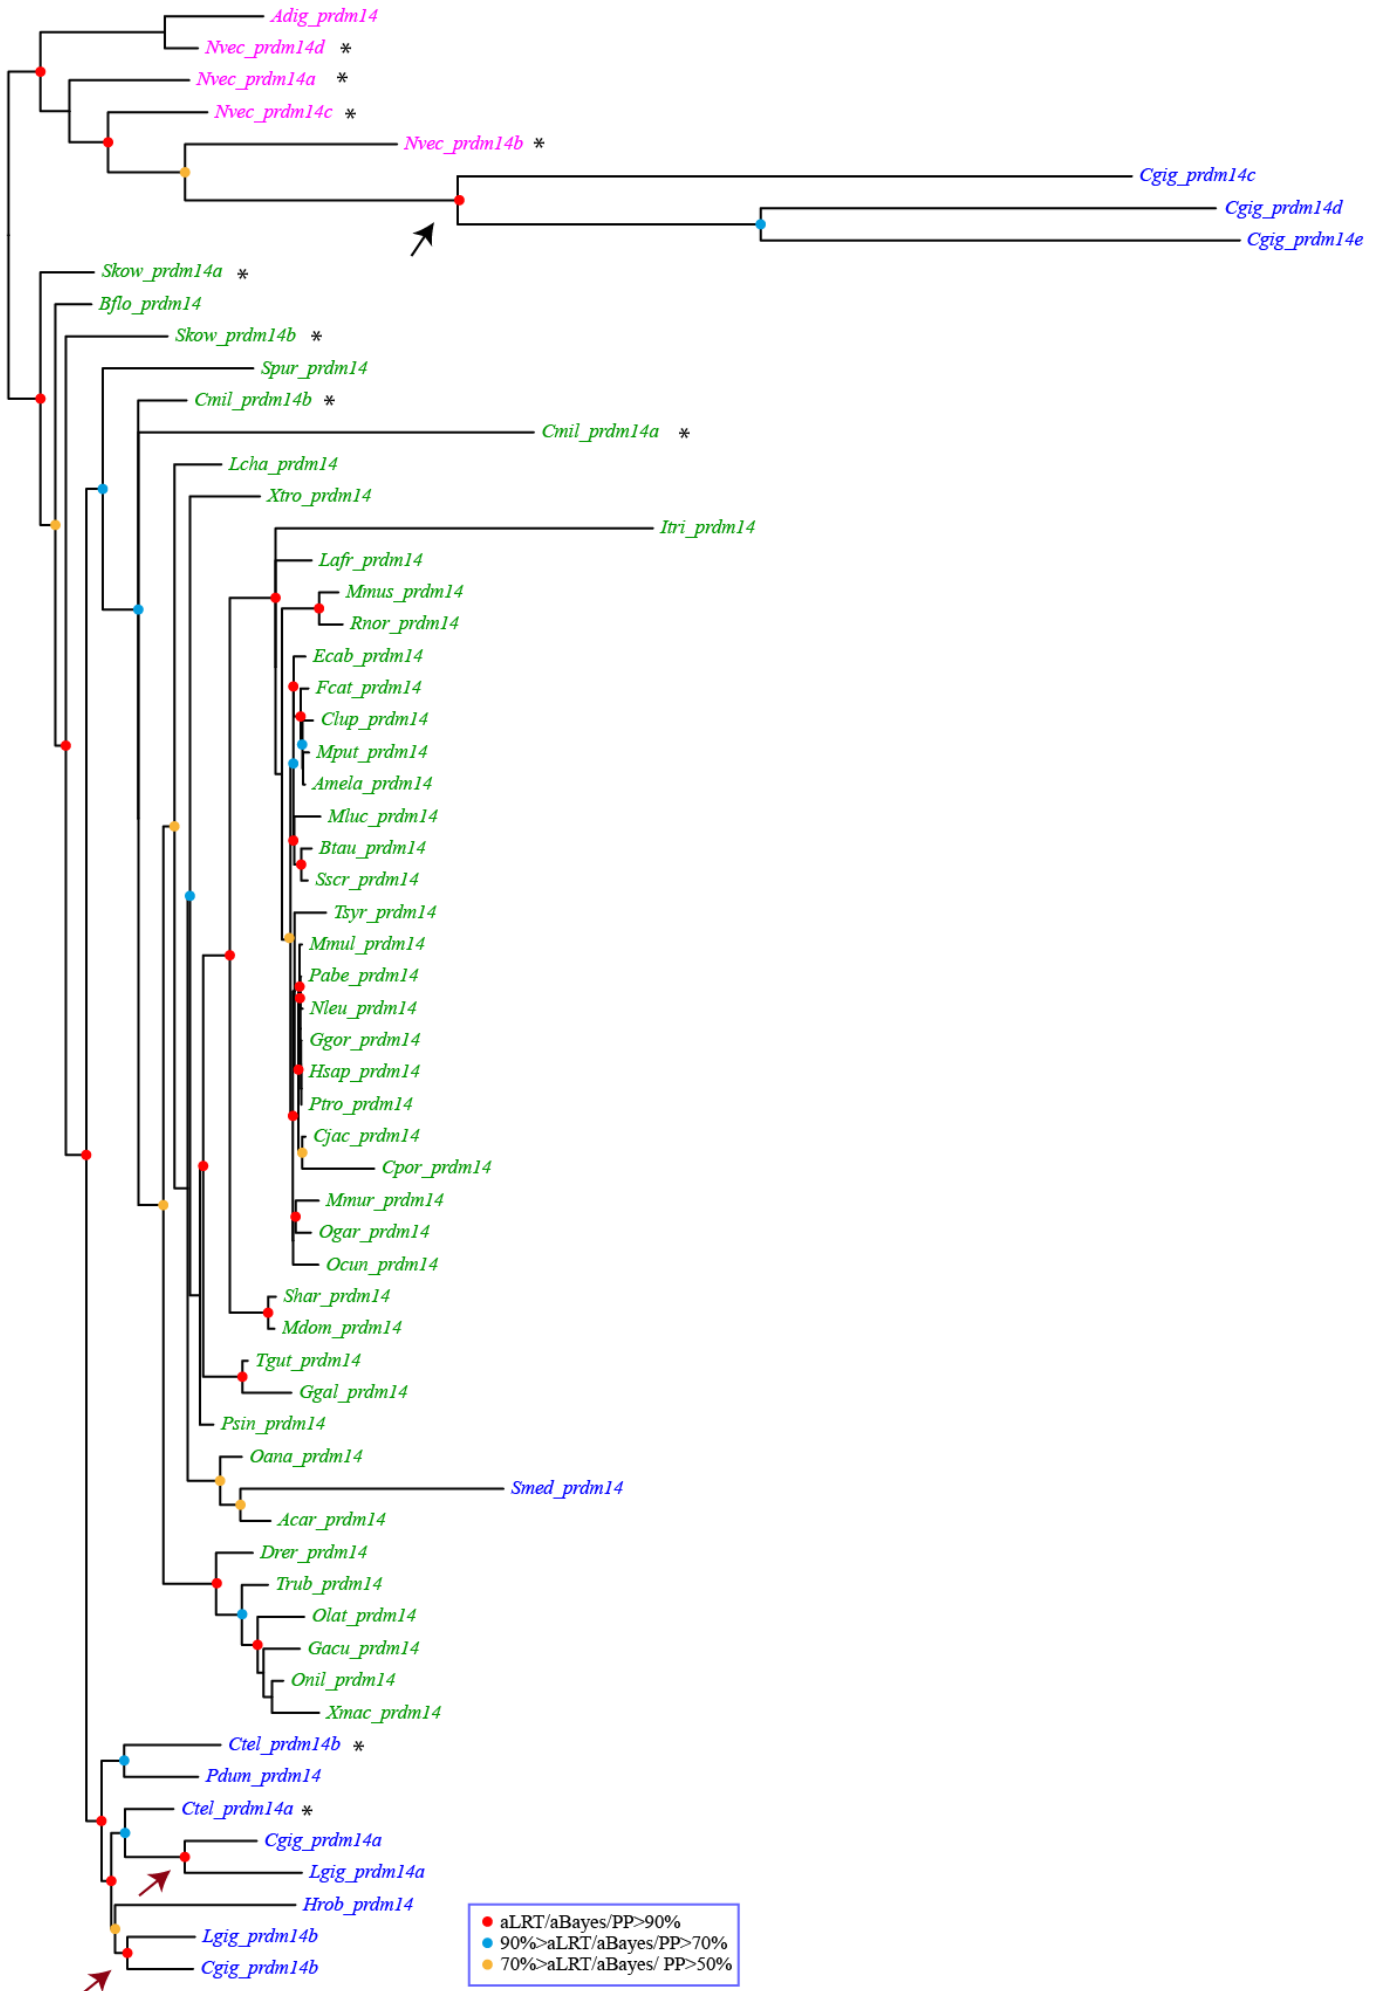



**Supplementary Figure S15: Phylogenetic analysis of the Prdm14 subfamily.** A ML tree is shown. Midpoint rooting has been used. A similar tree topology has been obtained by BI. Legend is as in Supplementary Fig. S5. In addition, red arrows point to two groups of mollusk genes and correspond to a gene duplication that has occurred in the mollusk lineage.

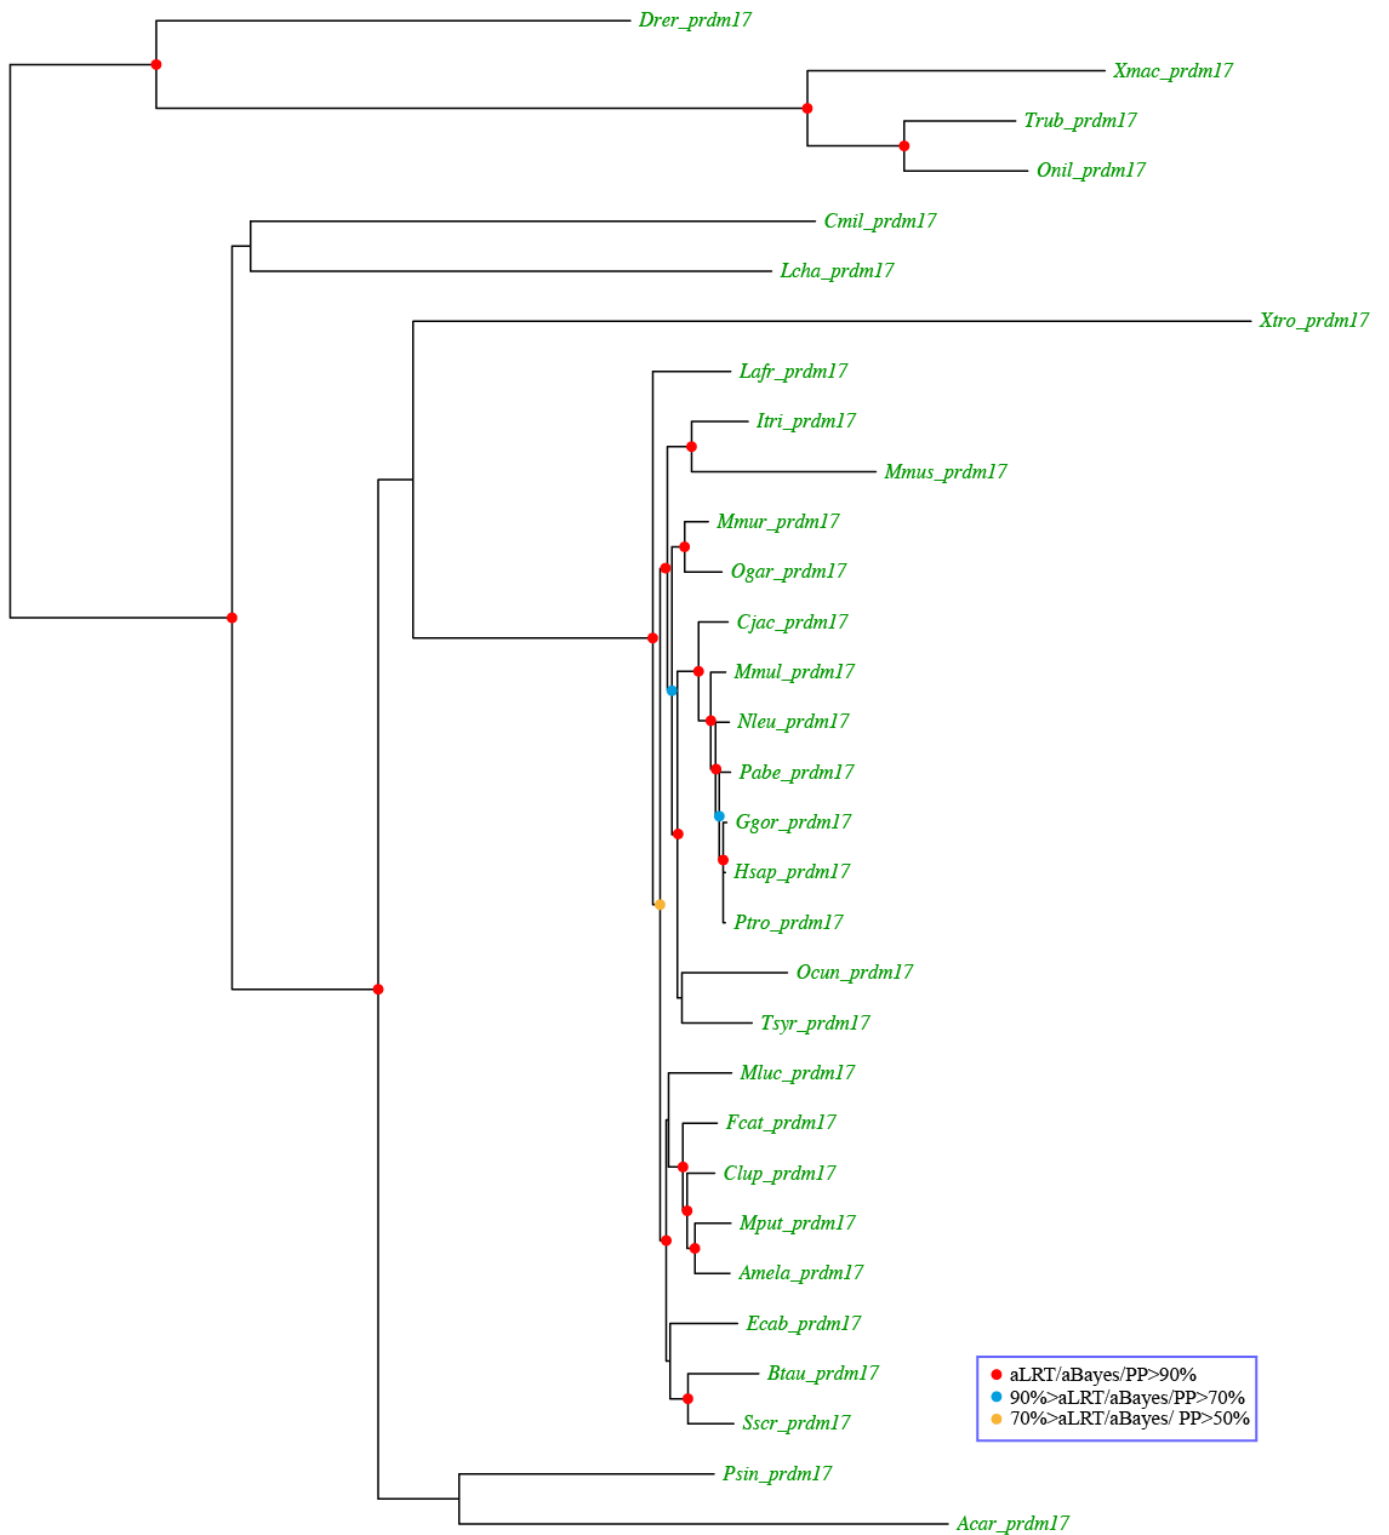

**Supplementary Figure S16: Phylogenetic analysis of the Prdm17 subfamily.** A ML tree is shown. Midpoint rooting has been used. A similar tree topology has been obtained by BI. Legend is as in Supplementary Fig. S5.

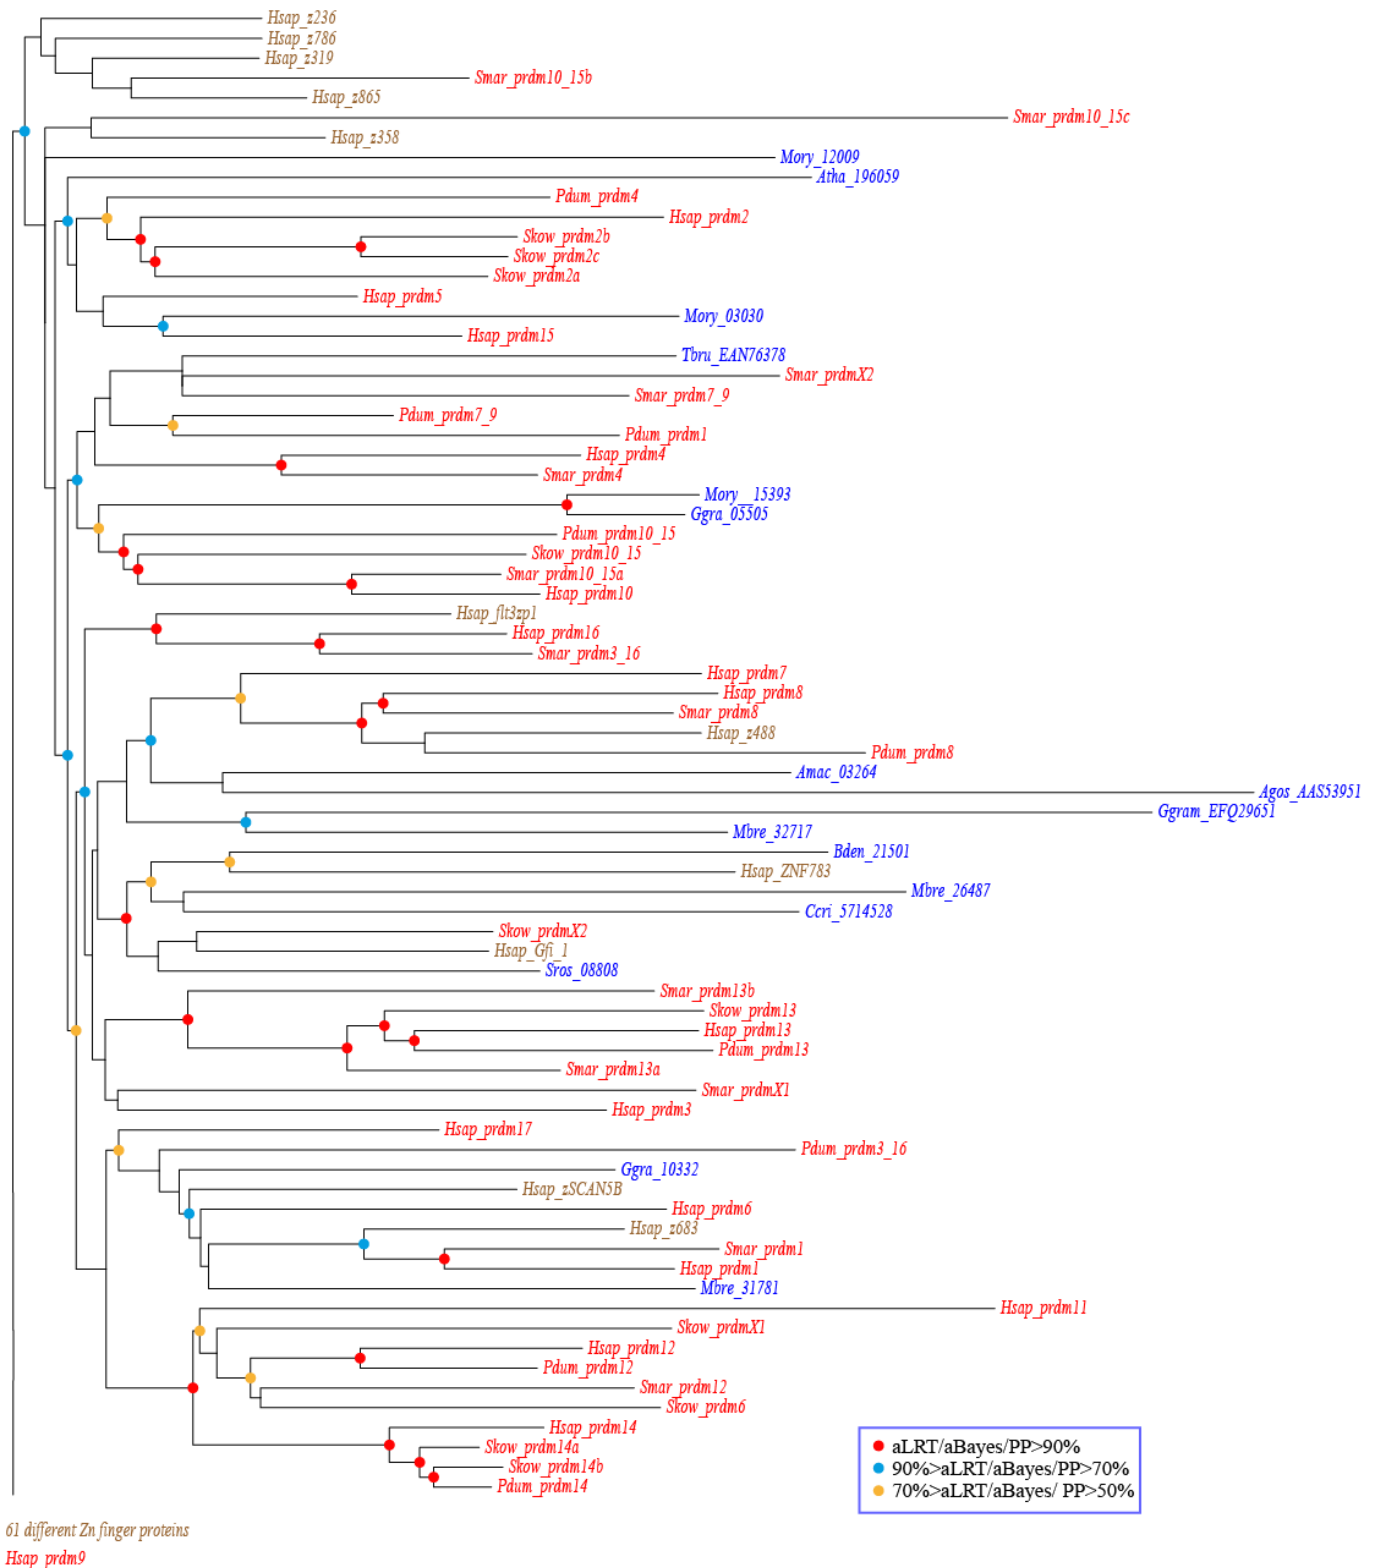

**Supplementary Figure S17: Phylogenetic analysis of the Zn finger and Prdm proteins.** A ML tree is shown. Midpoint rooting has been used. A similar tree topology has been obtained by BI. Legend is as in Supplementary Fig. S5. Additional species abbreviations can be found in Table S17.

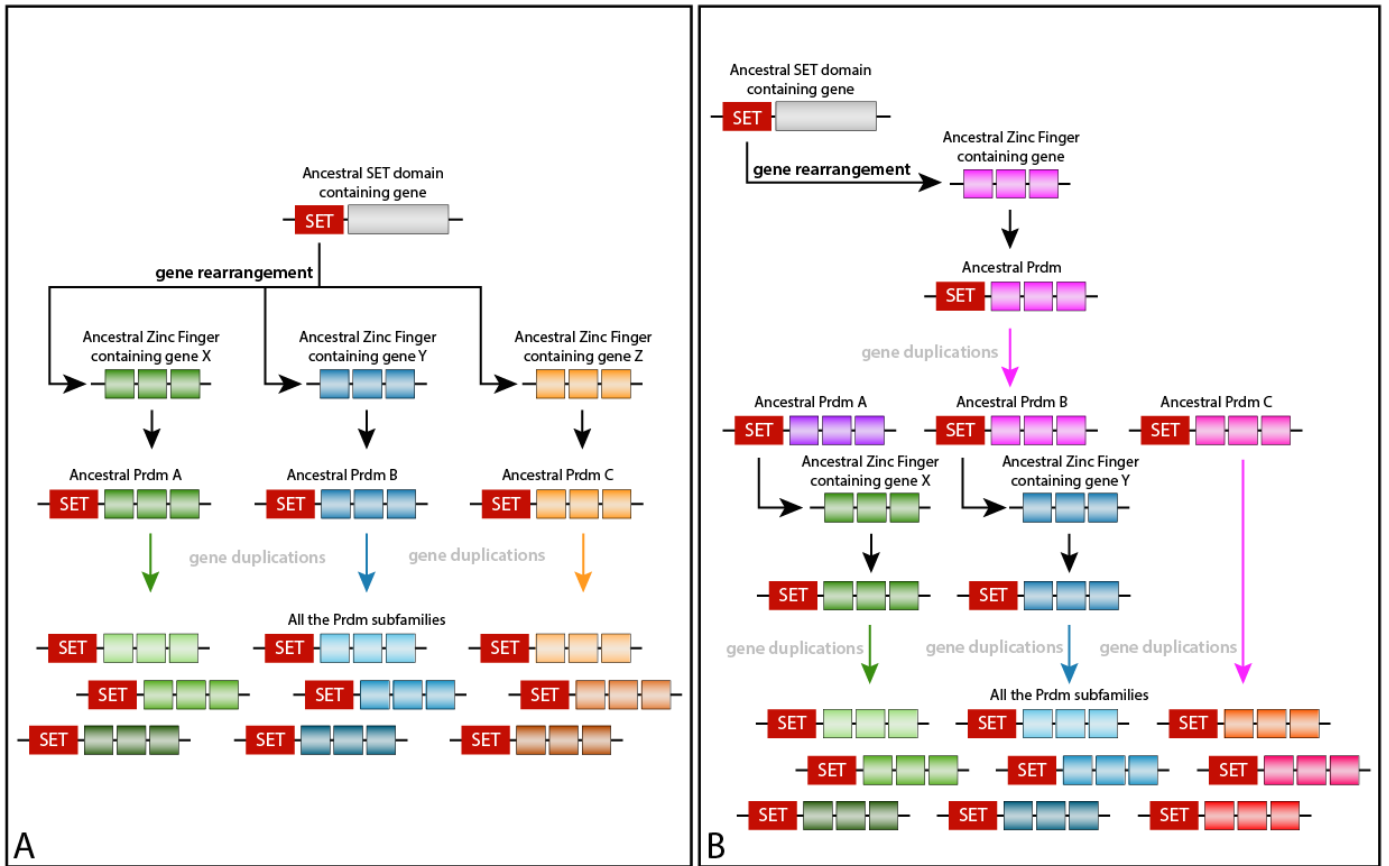

**Supplementary Figure S18: Two alternative hypotheses for the origin of the *Prdm* genes in animals.**

(A) The *Prdm* genes originate through the rearrangements between a single ancestral SET domain containing gene and several different genes encoding Zn fingers. The ancestral *Prdm* genes subsequently diversified through gene duplications. (B) The *Prdm* genes originate through the rearrangements between a single ancestral SET domain containing gene and a single gene encoding Zn fingers. Diversification subsequently occurred through gene duplications and gene rearrangements with different genes encoding Zn fingers.
