# Supplementary material for: Evolution of Prdm Genes in Animals: Insights from Comparative Genomics
Source: PubMed Central journal article supplement — Mol Biol Evol. 2015 Nov 11;33(3):679–96. doi: 10.1093/molbev/msv260 (PMC4760075; doi:10.1093/molbev/msv260), 2015-11-11
Supplement: supp_msv260_Vervoortetal_suppTables_revised.pdf [file supp_msv260_Vervoortetal_suppTables_revised.pdf]

**Table S1: Detailed overview of *Prdm* genes in metazoans.**

Black boxes indicate the presence of members of the different subfamilies (number of members is indicated) in the different species.

|                                      |                                 |                               | # PRDM      | PRDM1 | PRDM2 | PRDM3/16 | PRDM4 | PRDM5 | PRDM6 | PRDM7/9 | PRDM8 | PRDM10/15 | PRDM11 | PRDM12 | PRDM13 | PRDM14 | PRDM17 | Orphans |
|--------------------------------------|---------------------------------|-------------------------------|-------------|-------|-------|----------|-------|-------|-------|---------|-------|-----------|--------|--------|--------|--------|--------|---------|
| Sponges                              | <i>Sycon ciliatum</i>           | <i>Scil</i>                   | 8           |       |       |          |       |       | 1     |         |       |           |        |        |        |        |        | 7       |
|                                      | <i>Amphimedon queenslandica</i> | <i>Aque</i>                   | 4           |       |       |          |       |       |       | 1       |       |           |        | 1      |        |        |        | 2       |
|                                      | <i>Oscarella carmela</i>        | <i>Ocar</i>                   | 2           |       |       |          |       |       | 1     |         |       |           |        |        |        |        |        | 1       |
| Ctenophores                          | <i>Mnemiopsis leidyi</i>        | <i>Mley</i>                   | 3           |       |       |          |       |       | 1     |         | 1     |           |        |        |        |        |        | 1       |
|                                      | <i>Pleurobrachia bachei</i>     | <i>Pbac</i>                   | 3           |       |       |          |       |       | 2     |         |       |           |        |        |        |        |        | 1       |
| Cnidarians                           | <i>Nematostella vectensis</i>   | <i>Nvec</i>                   | 13          |       |       |          |       |       | 5     | 1       |       |           |        | 1      | 2      | 4      |        |         |
|                                      | <i>Acropora digitifera</i>      | <i>Adig</i>                   | 11          |       |       |          |       |       | 5     | 2       |       |           |        | 1      | 1      | 1      |        | 1       |
|                                      | <i>Hydra magnipapillata</i>     | <i>Hmag</i>                   | 7           |       |       |          |       |       | 2     | 2       |       |           |        |        | 1      |        |        | 2       |
| Placozoans                           | <i>Trichoplax adhaerens</i>     | <i>Tadh</i>                   | 2           |       |       |          |       |       |       |         |       |           |        | 1      | 1      |        |        |         |
| Lophotrochozoans                     | <i>Crassostrea gigas</i>        | <i>Cgig</i>                   | 13          | 1     |       | 2        | 1     |       |       |         |       | 1         |        | 1      | 1      |        |        | 1       |
|                                      | <i>Lottia gigantea</i>          | <i>Lgig</i>                   | 12          | 1     | 1     | 1        | 1     |       |       | 1       | 1     | 1         |        | 1      | 1      | 2      |        | 1       |
|                                      | <i>Pinctada fucata</i>          | <i>Pfuc</i>                   | 8           |       |       | 2        |       |       |       | 1       | 1     | 1         |        |        |        |        |        | 3       |
|                                      | <i>Platynereis dumerilii</i>    | <i>Pdum</i>                   | 11          | 2     |       | 1        | 1     |       |       | 2       | 1     | 1         |        | 1      | 1      | 1      |        |         |
|                                      | <i>Capitella teleta</i>         | <i>Ctel</i>                   | 11          | 1     | 2     | 1        | 1     |       |       |         | 1     | 1         |        |        | 1      | 2      |        | 1       |
|                                      | <i>Helobdella robusta</i>       | <i>Hrob</i>                   | 8           | 2     |       | 2        |       |       |       |         |       | 1         |        |        | 1      | 1      |        | 1       |
|                                      | <i>Adineta vaga</i>             | <i>Avag</i>                   | 9           | 2     |       | 3        |       |       |       |         | 1     |           |        |        | 1      |        |        | 2       |
|                                      | <i>Schmidtea mediterranea</i>   | <i>Smed</i>                   | 8           | 1     |       | 2        |       |       |       |         | 1     |           |        |        | 1      | 1      |        | 2       |
|                                      | <i>Schistosoma mansoni</i>      | <i>Sman</i>                   | 6           | 1     |       | 1        |       |       |       |         | 1     |           |        |        |        |        |        | 3       |
|                                      | Ecdysozoans                     | <i>Caenorhabditis elegans</i> | <i>Cele</i> | 2     | 1     |          |       |       |       |         | 1     |           |        |        |        |        |        |         |
| <i>Pristionchus pacificus</i>        |                                 | <i>Ppac</i>                   | 7           | 2     |       |          |       |       |       | 1       | 1     |           |        |        |        |        |        | 3       |
| <i>Brugia malayi</i>                 |                                 | <i>Bmal</i>                   | 3           | 1     |       | 1        |       |       |       | 1       |       |           |        |        |        |        |        |         |
| <i>Loa loa</i>                       |                                 | <i>Lloa</i>                   | 4           | 2     |       | 1        |       |       |       | 1       |       |           |        |        |        |        |        |         |
| <i>Wuchereria bancrofti</i>          |                                 | <i>Wban</i>                   | 4           | 1     |       | 1        |       |       |       | 1       |       |           |        |        |        |        |        | 1       |
| <i>Trichinella spiralis</i>          |                                 | <i>Tspi</i>                   | 3           | 1     |       | 1        |       |       |       |         |       |           |        |        |        | 1      |        |         |
| <i>Metaseiulus occidentalis</i>      |                                 | <i>Moce</i>                   | 4           | 1     |       | 1        |       |       |       |         | 1     |           |        |        | 1      |        |        |         |
| <i>Ixodes scapularis</i>             |                                 | <i>Isca</i>                   | 5           |       |       | 1        |       |       |       |         | 1     | 1         |        |        | 1      | 1      |        |         |
| <i>Tetranychus urticae</i>           |                                 | <i>Turt</i>                   | 5           | 2     |       | 1        |       |       |       |         | 1     | 1         |        |        | 1      | 1      |        |         |
| <i>Strigamia maritima</i>            |                                 | <i>Smar</i>                   | 13          | 1     |       | 1        | 1     |       |       | 1       | 1     | 3         |        | 1      | 2      |        |        | 2       |
| <i>Daphnia pulex</i>                 |                                 | <i>Dpul</i>                   | 4           | 1     |       | 1        |       |       |       |         | 1     |           |        |        | 1      |        |        |         |
| <i>Pediculus humanus corporis</i>    |                                 | <i>Phum</i>                   | 6           | 1     |       | 2        |       |       |       |         | 1     | 1         |        |        | 1      |        |        |         |
| <i>Acyrtosiphon pisum</i>            |                                 | <i>Apis</i>                   | 5           | 1     |       | 2        |       |       |       |         | 1     | 1         |        |        |        |        |        |         |
| <i>Rhodnius prolixus</i>             |                                 | <i>Rpro</i>                   | 4           | 1     |       | 1        |       |       |       |         |       |           |        |        | 1      |        |        | 1       |
| <i>Aedes aegypti</i>                 |                                 | <i>Aaeg</i>                   | 4           | 1     |       | 1        |       |       |       |         | 1     |           |        |        | 1      |        |        |         |
| <i>Culex quinquefasciatus</i>        |                                 | <i>Cqui</i>                   | 5           | 1     |       | 3        |       |       |       |         | 1     |           |        |        | 1      |        |        |         |
| <i>Drosophila melanogaster</i>       |                                 | <i>Dmel</i>                   | 5           | 1     |       | 2        |       |       |       |         | 1     |           |        |        | 1      |        |        |         |
| <i>Ceratitis capitata</i>            |                                 | <i>Ccap</i>                   | 4           | 1     |       | 1        |       |       |       |         | 1     |           |        |        | 1      |        |        |         |
| <i>Atta cephalotes</i>               |                                 | <i>Acep</i>                   | 7           | 1     |       | 2        |       |       |       |         | 1     | 1         |        |        | 1      |        |        | 1       |
| <i>Megachile rotundata</i>           |                                 | <i>Mrot</i>                   | 4           | 1     |       |          |       |       |       |         | 1     | 1         |        |        | 1      |        |        |         |
| <i>Bombus terrestris</i>             |                                 | <i>Bter</i>                   | 6           | 1     |       | 2        |       |       |       |         | 1     | 1         |        |        | 1      |        |        |         |
| <i>Bombus impatiens</i>              |                                 | <i>Bimp</i>                   | 6           | 1     |       | 2        |       |       |       |         | 1     | 1         |        |        | 1      |        |        |         |
| <i>Apis mellifera</i>                |                                 | <i>Amel</i>                   | 4           | 1     |       | 1        |       |       |       |         | 1     | 1         |        |        |        |        |        |         |
| <i>Nasonia vitripennis</i>           |                                 | <i>Nvit</i>                   | 5           | 1     |       | 1        |       |       |       |         | 1     | 1         |        |        | 1      |        |        |         |
| <i>Tribolium castaneum</i>           |                                 | <i>Tcas</i>                   | 6           | 1     |       | 2        |       |       |       |         | 1     | 1         |        |        | 1      |        |        |         |
| <i>Bombyx mori</i>                   |                                 | <i>Bmor</i>                   | 5           | 1     |       | 1        |       |       |       |         | 1     |           |        |        | 1      |        |        | 1       |
| <i>Danaus plexippus</i>              |                                 | <i>Dple</i>                   | 6           | 1     |       | 2        |       |       |       |         | 1     |           |        |        | 1      |        |        | 1       |
| <i>Heliconius melpomene</i>          |                                 | <i>Hmel</i>                   | 4           | 1     |       | 2        |       |       |       |         | 1     |           |        |        |        |        |        |         |
| <i>Saccoglossus kowalevskii</i>      |                                 | <i>Skow</i>                   | 10          |       | 2     |          |       |       |       | 1       |       |           | 1      |        | 1      | 2      |        | 3       |
| <i>Strongylocentrotus purpuratus</i> |                                 | <i>Spur</i>                   | 18          | 1     | 1     | 1        | 1     |       |       |         | 10    |           | 1      |        | 1      | 1      | 1      |         |
| <i>Branchiostoma floridae</i>        | <i>Bflo</i>                     | 11                            | 1           | 1     | 1     | 1        |       |       | 1     | 1       |       | 1         |        | 1      | 1      | 1      | 1      |         |
| <i>Ciona intestinalis</i>            | <i>Cint</i>                     | 7                             | 2           |       | 2     |          |       |       |       | 1       |       | 1         |        |        |        |        | 1      |         |
| <i>Ciona savignyi</i>                | <i>Csav</i>                     | 5                             | 1           | 1     | 1     |          |       |       |       |         |       | 1         |        |        |        |        | 1      |         |
| <i>Petromyzon marinus</i>            | <i>Pmar</i>                     | 9                             | 1           |       | 1     | 1        | 1     | 1     | 1     | 2       | 1     | 1         |        |        |        |        |        |         |
| <i>Callorhynchus milii</i>           | <i>Cmil</i>                     | 17                            | 2           | 1     | 2     | 1        | 1     | 1     | 1     |         | 2     | 2         |        | 1      | 1      | 2      | 1      |         |
| <i>Danio rerio</i>                   | <i>Drer</i>                     | 19                            | 2           | 2     | 2     | 1        | 1     | 1     | 1     | 1       | 3     | 1         | 1      | 1      | 1      | 1      | 1      |         |
| <i>Takifugu rubripes</i>             | <i>Trub</i>                     | 19                            | 3           | 2     | 2     | 1        | 1     | 1     | 1     | 1       | 1     | 2         |        | 2      | 1      | 1      | 1      |         |
| <i>Gasterosteus aculeatus</i>        | <i>Gacu</i>                     | 13                            | 3           | 1     | 2     | 1        |       |       |       |         | 1     | 2         |        | 1      | 1      | 1      |        |         |
| <i>Xiphophorus maculatus</i>         | <i>Xmac</i>                     | 17                            | 3           | 1     | 2     | 1        | 1     | 1     | 1     |         | 1     | 2         |        | 2      | 1      | 1      | 1      |         |

**Table S1: Detailed overview of *Prdm* genes in metazoans.**

Black boxes indicate the presence of members of the different subfamilies (number of members is indicated) in the different species.

|                        |                                   | # PRDM       | PRDM1 | PRDM2 | PRDM3/16 | PRDM4 | PRDM5 | PRDM6 | PRDM7/9 | PRDM8 | PRDM10/15 | PRDM11 | PRDM12 | PRDM13 | PRDM14 | PRDM17 | Orphans |    |
|------------------------|-----------------------------------|--------------|-------|-------|----------|-------|-------|-------|---------|-------|-----------|--------|--------|--------|--------|--------|---------|----|
| Deuterostomes          | <i>Oreochromis niloticus</i>      | <i>Onil</i>  | 19    | 3     | 2        | 2     | 1     | 1     | 1       | 1     | 2         |        | 2      | 1      | 1      | 1      |         |    |
|                        | <i>Oryzias latipes</i>            | <i>Olat</i>  | 19    | 3     | 2        | 2     | 1     | 1     | 1       | 1     | 2         |        | 2      | 1      | 1      |        |         |    |
|                        | <i>Latimeria chalumnae</i>        | <i>Lcha</i>  | 16    | 2     | 1        | 2     | 1     | 1     | 1       |       | 1         | 2      | 1      | 1      | 1      | 1      |         |    |
|                        | <i>Xenopus tropicalis</i>         | <i>Xtro</i>  | 15    | 1     | 1        | 2     | 1     | 1     | 1       | 1     | 1         | 2      |        | 1      | 1      | 1      | 1       |    |
|                        | <i>Anolis carolinensis</i>        | <i>Acar</i>  | 12    | 1     |          | 2     | 1     | 1     | 1       |       | 1         | 2      | 1      |        |        | 1      | 1       |    |
|                        | <i>Pelodiscus sinensis</i>        | <i>Psin</i>  | 16    | 1     | 1        | 2     | 1     | 1     | 1       | 1     | 1         | 2      | 1      | 1      | 1      | 1      | 1       |    |
|                        | <i>Gallus gallus</i>              | <i>Ggal</i>  | 13    | 1     | 1        | 2     | 1     | 1     | 1       |       | 1         | 2      | 1      | 1      |        | 1      |         |    |
|                        | <i>Taeniopygia guttata</i>        | <i>Tgut</i>  | 14    | 1     | 1        | 2     | 1     | 1     | 1       |       | 1         | 2      | 1      | 1      | 1      | 1      | 1       |    |
|                        | <i>Ornithorhynchus anatinus</i>   | <i>Oana</i>  | 14    | 1     | 1        | 1     | 1     | 1     | 1       | 1     | 1         | 2      | 1      | 1      | 1      | 1      |         |    |
|                        | <i>Sarcophilus harrisii</i>       | <i>Shar</i>  | 13    | 1     | 1        | 1     | 1     | 1     | 1       |       | 1         | 2      | 1      | 1      | 1      | 1      |         |    |
|                        | <i>Monodelphis domestica</i>      | <i>Mdom</i>  | 15    | 1     | 1        | 2     | 1     | 1     | 1       | 1     | 1         | 2      | 1      | 1      | 1      | 1      | 1       |    |
|                        | <i>Macropus eugenii</i>           | <i>Meug</i>  | 14    | 1     | 1        | 2     | 1     | 1     | 1       |       | 1         | 2      | 1      | 1      | 1      | 1      |         |    |
|                        | <i>Ailuropoda melanoleuca</i>     | <i>Amela</i> | 16    | 1     | 1        | 2     | 1     | 1     | 1       | 1     | 1         | 2      | 1      | 1      | 1      | 1      | 1       |    |
|                        | <i>Canis lupus familiaris</i>     | <i>Clup</i>  | 15    | 1     | 1        | 2     | 1     | 1     | 1       |       | 1         | 2      | 1      | 1      | 1      | 1      | 1       |    |
|                        | <i>Mustela putorius furo</i>      | <i>Mput</i>  | 16    | 1     | 1        | 2     | 1     | 1     | 1       | 1     | 1         | 2      | 1      | 1      | 1      | 1      | 1       |    |
|                        | <i>Felis catus</i>                | <i>Fcat</i>  | 16    | 1     | 1        | 2     | 1     | 1     | 1       | 1     | 1         | 2      | 1      | 1      | 1      | 1      | 1       |    |
|                        | <i>Myotis lucifugus</i>           | <i>Mluc</i>  | 15    | 1     | 1        | 1     | 1     | 1     | 1       | 1     | 1         | 2      | 1      | 1      | 1      | 1      | 1       |    |
|                        | <i>Sus scrofa</i>                 | <i>Sscr</i>  | 16    | 1     | 1        | 2     | 1     | 1     | 1       | 1     | 1         | 2      | 1      | 1      | 1      | 1      | 1       |    |
|                        | <i>Bos taurus</i>                 | <i>Btau</i>  | 16    | 1     | 1        | 2     | 1     | 1     | 1       | 1     | 1         | 2      | 1      | 1      | 1      | 1      | 1       |    |
|                        | <i>Equus caballus</i>             | <i>Ecab</i>  | 15    | 1     | 1        | 2     | 1     | 1     | 1       |       | 1         | 2      | 1      | 1      | 1      | 1      | 1       |    |
|                        | <i>Loxodonta africana</i>         | <i>Lafr</i>  | 16    | 1     | 1        | 2     | 1     | 1     | 1       | 1     | 1         | 2      | 1      | 1      | 1      | 1      | 1       |    |
|                        | <i>Cavia porcellus</i>            | <i>Cpor</i>  | 14    | 1     | 1        | 2     | 1     | 1     | 1       |       | 1         | 2      | 1      | 1      | 1      | 1      |         |    |
|                        | <i>Ictidomys tridecemlineatus</i> | <i>Itri</i>  | 15    | 1     | 1        | 2     | 1     | 1     | 1       |       | 1         | 2      | 1      | 1      | 1      | 1      | 1       |    |
|                        | <i>Rattus norvegicus</i>          | <i>Rnor</i>  | 15    | 1     | 1        | 2     | 1     | 1     | 1       | 1     | 1         | 2      | 1      | 1      | 1      | 1      |         |    |
|                        | <i>Mus musculus</i>               | <i>Mmus</i>  | 16    | 1     | 1        | 2     | 1     | 1     | 1       | 1     | 1         | 2      | 1      | 1      | 1      | 1      | 1       |    |
|                        | <i>Oryctolagus cuniculus</i>      | <i>Ocun</i>  | 16    | 1     | 1        | 2     | 1     | 1     | 1       | 1     | 1         | 2      | 1      | 1      | 1      | 1      | 1       |    |
|                        | <i>Microcebus murinus</i>         | <i>Mmur</i>  | 15    | 1     | 1        | 2     | 1     | 1     | 1       | 1     |           | 2      | 1      | 1      | 1      | 1      | 1       |    |
|                        | <i>Otolemur garnettii</i>         | <i>Ogar</i>  | 15    | 1     | 1        | 2     | 1     | 1     |         | 1     | 1         | 2      | 1      | 1      | 1      | 1      | 1       |    |
|                        | <i>Tarsius syrichta</i>           | <i>Tsyr</i>  | 12    | 1     | 1        | 2     | 1     | 1     | 1       |       |           | 2      | 1      |        |        | 1      | 1       |    |
|                        | <i>Callithrix jacchus</i>         | <i>Cjac</i>  | 17    | 1     | 1        | 2     | 1     | 1     | 1       | 2     | 1         | 2      | 1      | 1      | 1      | 1      | 1       |    |
|                        | <i>Macaca mulatta</i>             | <i>Mmul</i>  | 15    | 1     | 1        | 2     | 1     | 1     | 1       | 2     | 1         | 2      | 1      |        |        | 1      | 1       |    |
|                        | <i>Nomascus leucogenys</i>        | <i>Nleu</i>  | 16    | 1     | 1        | 2     | 1     | 1     | 1       | 1     | 1         | 2      | 1      | 1      | 1      | 1      | 1       |    |
|                        | <i>Gorilla gorilla</i>            | <i>Ggor</i>  | 16    | 1     | 1        | 2     | 1     | 1     |         | 2     | 1         | 2      | 1      | 1      | 1      | 1      | 1       |    |
| <i>Pongo abelii</i>    | <i>Pabe</i>                       | 15           | 1     | 1     | 2        | 1     | 1     |       | 2       | 1     | 2         |        | 1      | 1      | 1      | 1      |         |    |
| <i>Pan troglodytes</i> | <i>Ptro</i>                       | 17           | 1     | 1     | 2        | 1     | 1     | 1     | 2       | 1     | 2         | 1      | 1      | 1      | 1      | 1      |         |    |
| <i>Homo sapiens</i>    | <i>Hsap</i>                       | 17           | 1     | 1     | 2        | 1     | 1     | 1     | 2       | 1     | 2         | 1      | 1      | 1      | 1      | 1      |         |    |
|                        |                                   |              | 976   | 101   | 52       | 136   | 49    | 41    | 57      | 63    | 74        | 106    | 33     | 53     | 73     | 63     | 31      | 45 |

**Table S2: Prdm genes in non-bilaterians.**

| Taxa                 | Species (common name)                                                                     | Source of the used sequences / Sequencing centers   | # PRDM genes                                                    | Genes                                                                                   | Accession proteins   | Domains                                                                                    | PRDM family                | Best Blast Hit Human                                              |                                                                                           |
|----------------------|-------------------------------------------------------------------------------------------|-----------------------------------------------------|-----------------------------------------------------------------|-----------------------------------------------------------------------------------------|----------------------|--------------------------------------------------------------------------------------------|----------------------------|-------------------------------------------------------------------|-------------------------------------------------------------------------------------------|
| Porifera             | <i>Porifera; Calcareia; Calcaronea; Leucosolenia; Sycetidae; Sycon</i>                    | <i>Sycon ciliatum</i>                               | Sars Center Bergen                                              | 8                                                                                       | <i>Scil-PRDMX1</i>   | 1234 scpid67802  scgid6984                                                                 | SET                        | Orphan                                                            | NP_064612 histone-lysine N-methyltransferase PRDM9 [Homo sapiens]                         |
|                      |                                                                                           |                                                     |                                                                 |                                                                                         | <i>Scil-PRDMX2</i>   | 17767 scpid70867  scgid1043                                                                | SET                        | Orphan                                                            | NP_001091643 probable histone-lysine N-methyltransferase PRDM7 isoform 1 [Homo sapiens]   |
|                      |                                                                                           |                                                     |                                                                 |                                                                                         | <i>Scil-PRDMX3</i>   | 18954 scpid48982  scgid2795                                                                | SET                        | Orphan                                                            | NP_064612 histone-lysine N-methyltransferase PRDM9 [Homo sapiens]                         |
|                      |                                                                                           |                                                     |                                                                 |                                                                                         | <i>Scil-PRDM6</i>    | 40183 scpid51388  scgid1270                                                                | SET                        | 6                                                                 | NP_064612 histone-lysine N-methyltransferase PRDM9 [Homo sapiens]                         |
|                      |                                                                                           |                                                     |                                                                 |                                                                                         | <i>Scil-PRDMX4</i>   | 37266 scpid67503  scgid0852                                                                | SET                        | Orphan                                                            | NP_064612 histone-lysine N-methyltransferase PRDM9 [Homo sapiens]                         |
|                      |                                                                                           |                                                     |                                                                 |                                                                                         | <i>Scil-PRDMX5</i>   | 18182 scpid70624  scgid16894                                                               | SET                        | Orphan                                                            | NP_001091643 probable histone-lysine N-methyltransferase PRDM7 isoform 1 [Homo sapiens]   |
|                      |                                                                                           |                                                     |                                                                 |                                                                                         | <i>Scil-PRDMX6</i>   | 37037 scpid67616  scgid5390                                                                | SET                        | Orphan                                                            | NP_064612 histone-lysine N-methyltransferase PRDM9 [Homo sapiens]                         |
|                      |                                                                                           |                                                     |                                                                 |                                                                                         | <i>Scil-PRDMX7</i>   | 1603 scpid67900  scgid3478                                                                 | SET                        | Orphan                                                            | NP_001091643 probable histone-lysine N-methyltransferase PRDM7 isoform 1 [Homo sapiens]   |
| Porifera             | <i>Porifera; Demospongiae; Homoscleromorpha; Homosclerophorida; Plakinidae; Oscarella</i> | <i>Oscarella carmela</i>                            | Compagen / University of Berkeley and University of Denver      | 2                                                                                       | <i>Ocar-PRDM6</i>    | g8397.t1                                                                                   | SET                        | 6                                                                 | NP_001129711 putative histone-lysine N-methyltransferase PRDM6 [Homo sapiens]             |
|                      |                                                                                           |                                                     |                                                                 |                                                                                         | <i>Ocar-PRDMX</i>    | g8398.t1                                                                                   | SET                        | Orphan                                                            | NP_067632 PR domain zinc finger protein 12 [Homo sapiens]                                 |
| Porifera             | <i>Porifera; Demospongiae; Ceractinomorpha; Haptosclerida; Niphatidae; Amphimedon</i>     | <i>Amphimedon queenslandica</i>                     | Doe Joint Genome Institute                                      | 4                                                                                       | <i>Aque-PRDM7/9</i>  | Aqu1_218884 unnamed protein product                                                        | SET + 4 Zn-F               | 7/9                                                               | NP_064612 histone-lysine N-methyltransferase PRDM9 [Homo sapiens]                         |
|                      |                                                                                           |                                                     |                                                                 |                                                                                         | <i>Aque-PRDM12</i>   | Aqu1_219141 unnamed protein product                                                        | SET + 2 Zn-F               | 12                                                                | NP_067632 PR domain zinc finger protein 12 [Homo sapiens]                                 |
|                      |                                                                                           |                                                     |                                                                 |                                                                                         | <i>Aque-PRDMX1</i>   | Aqu1_219799 unnamed protein product                                                        | SET                        | Orphan                                                            | NP_064612 histone-lysine N-methyltransferase PRDM9 [Homo sapiens]                         |
|                      |                                                                                           |                                                     |                                                                 |                                                                                         | <i>Aque-PRDMX2</i>   | Aqu1_222640 unnamed protein product                                                        | SET                        | Orphan                                                            | NP_078780 PR domain zinc finger protein 14 [Homo sapiens]                                 |
| Ctenophora           | <i>Ctenophora; Cyclocoela; Lobata; Bolinopidae; Mnemiopsis</i>                            | <i>Mnemiopsis leidyi (water comb jelly)</i>         | National Human Genome Research Institute                        | 3                                                                                       | <i>Mley-PRDM8</i>    | ML124240a unnamed protein product                                                          | SET                        | 8                                                                 | NP_064612 histone-lysine N-methyltransferase PRDM9 [Homo sapiens]                         |
|                      |                                                                                           |                                                     |                                                                 |                                                                                         | <i>Mley-PRDM6</i>    | ML274416a unnamed protein product                                                          | 2 Zn-F                     | 6                                                                 | NP_001129711 putative histone-lysine N-methyltransferase PRDM6 [Homo sapiens]             |
|                      |                                                                                           |                                                     |                                                                 |                                                                                         | <i>Mley-PRDMX</i>    | ML348714a unnamed protein product                                                          | 1 Zn-F                     | Orphan                                                            | NP_878911 PR domain zinc finger protein 1 isoform 2 [Homo sapiens]                        |
| Ctenophora           | <i>Ctenophora; Typhlocoela; Cydippida; Pleurobrachiidae; Pleurobrachia</i>                | <i>Pleurobrachia bachei</i>                         | Whitney Laboratory for Marine Bioscience, University of Florida | 3                                                                                       | <i>Pbac-PRDM6a</i>   | sb3460697                                                                                  | SET + 2 Zn-F               | 6                                                                 | NP_064612.2 histone-lysine N-methyltransferase PRDM9 [Homo sapiens]                       |
|                      |                                                                                           |                                                     |                                                                 |                                                                                         | <i>Pbac-PRDM6b</i>   | sb3471497                                                                                  | SET                        | 6                                                                 | NP_001091643.1 probable histone-lysine N-methyltransferase PRDM7 isoform 1 [Homo sapiens] |
|                      |                                                                                           |                                                     |                                                                 |                                                                                         | <i>Pbac-PRDMX</i>    | sb3461590                                                                                  | SET                        | Orphan                                                            | NP_078780.1 PR domain zinc finger protein 14 [Homo sapiens]                               |
| Cnidaria             | <i>Cnidaria; Anthozoa; Hexacorallia; Actiniaria; Edwardsiidae; Nematostella</i>           | <i>Nematostella vectensis (starlet sea anemone)</i> | Doe Joint Genome Institute                                      | 13                                                                                      | <i>Nvec-PRDM14a</i>  | gj Nemvel 104327 e_gw.72.27.1                                                              | SET + 2 Zn-F               | 14                                                                | NP_078780 PR domain zinc finger protein 14 [Homo sapiens]                                 |
|                      |                                                                                           |                                                     |                                                                 |                                                                                         | <i>Nvec-PRDM14b</i>  | gj Nemvel 193459 estExt_GenewiseH_1.C_2950019_                                             | SET + 2 Zn-F               | 14                                                                | NP_078780 PR domain zinc finger protein 14 [Homo sapiens]                                 |
|                      |                                                                                           |                                                     |                                                                 |                                                                                         | <i>Nvec-PRDM14c</i>  | gj Nemvel 61034 gw.22.245.1                                                                | SET + 2 Zn-F               | 14                                                                | NP_078780 PR domain zinc finger protein 14 [Homo sapiens]                                 |
|                      |                                                                                           |                                                     |                                                                 |                                                                                         | <i>Nvec-PRDM14d</i>  | gj Nemvel 96522 e_gw.43.248.1                                                              | SET + 2 Zn-F               | 14                                                                | NP_078780 PR domain zinc finger protein 14 [Homo sapiens]                                 |
|                      |                                                                                           |                                                     |                                                                 |                                                                                         | <i>Nvec-PRDM6a</i>   | gj Nemvel 112691 e_gw.113.70.1                                                             | SET + 2 Zn-F               | 6                                                                 | NP_067632 PR domain zinc finger protein 12 [Homo sapiens]                                 |
|                      |                                                                                           |                                                     |                                                                 |                                                                                         | <i>Nvec-PRDM6b</i>   | gj Nemvel 200651 fgenes1_pg_scaffold_23000016                                              | SET                        | 6                                                                 | NP_001129711 putative histone-lysine N-methyltransferase PRDM6 [Homo sapiens]             |
|                      |                                                                                           |                                                     |                                                                 |                                                                                         | <i>Nvec-PRDM6c</i>   | gj Nemvel 54602 gw.60.181.1                                                                | SET + 2 Zn-F               | 6                                                                 | NP_001129711 putative histone-lysine N-methyltransferase PRDM6 [Homo sapiens]             |
|                      |                                                                                           |                                                     |                                                                 |                                                                                         | <i>Nvec-PRDM6d</i>   | gj Nemvel 84066 e_gw.9.119.1                                                               | SET                        | 6                                                                 | NP_001129711 putative histone-lysine N-methyltransferase PRDM6 [Homo sapiens]             |
|                      |                                                                                           |                                                     |                                                                 |                                                                                         | <i>Nvec-PRDM6e</i>   | gj Nemvel 41788 gw.113.66.1                                                                | SET + 1 Zn-F               | 6                                                                 | NP_067632 PR domain zinc finger protein 12 [Homo sapiens]                                 |
|                      |                                                                                           |                                                     |                                                                 |                                                                                         | <i>Nvec-PRDM7/9</i>  | gj Nemvel 113856 e_gw.120.9.1                                                              | SET + 8 Zn-F               | 7/9                                                               | NP_064612 histone-lysine N-methyltransferase PRDM9 [Homo sapiens]                         |
|                      |                                                                                           |                                                     |                                                                 |                                                                                         | <i>Nvec-PRDM12</i>   | gj Nemvel 119550 e_gw.162.3.1                                                              | SET + 2 Zn-F               | 12                                                                | NP_067632 PR domain zinc finger protein 12 [Homo sapiens]                                 |
|                      |                                                                                           |                                                     |                                                                 |                                                                                         | <i>Nvec-PRDM13a</i>  | gj Nemvel 40616 gw.114.81.1                                                                | 1 Zn-F                     | 13                                                                | NP_067633 PR domain zinc finger protein 13 [Homo sapiens]                                 |
|                      |                                                                                           |                                                     |                                                                 |                                                                                         | <i>Nvec-PRDM13b</i>  | gj Nemvel 66221 gw.19.270.1                                                                | 1 Zn-F                     | 13                                                                | NP_067633 PR domain zinc finger protein 13 [Homo sapiens]                                 |
|                      |                                                                                           |                                                     |                                                                 |                                                                                         | Cnidaria             | <i>Cnidaria; Anthozoa; Hexacorallia; Scleractinia; Astrocoemina; Acroporidae; Acropora</i> | <i>Acropora digitifera</i> | Marine Genomics Unit, Okinawa Institute of Science and Technology | 11                                                                                        |
| <i>Adig-PRDM6a</i>   | adi_v1.03428                                                                              | SET + 1 Zn-F                                        | 6                                                               | NP_001129711 putative histone-lysine N-methyltransferase PRDM6 [Homo sapiens]           |                      |                                                                                            |                            |                                                                   |                                                                                           |
| <i>Adig-PRDM6b</i>   | adi_v1.03429                                                                              | SET                                                 | 6                                                               | NP_001129711 putative histone-lysine N-methyltransferase PRDM6 [Homo sapiens]           |                      |                                                                                            |                            |                                                                   |                                                                                           |
| <i>Adig-PRDM6c</i>   | adi_v1.03430                                                                              | SET + 2 Zn-F                                        | 6                                                               | NP_001129711 putative histone-lysine N-methyltransferase PRDM6 [Homo sapiens]           |                      |                                                                                            |                            |                                                                   |                                                                                           |
| <i>Adig-PRDM6d</i>   | adi_v1.03431                                                                              | SET + 1 Zn-F                                        | 6                                                               | NP_001129711 putative histone-lysine N-methyltransferase PRDM6 [Homo sapiens]           |                      |                                                                                            |                            |                                                                   |                                                                                           |
| <i>Adig-PRDM6e</i>   | adi_v1.03434                                                                              | SET + 1 Zn-F                                        | 6                                                               | NP_001129711 putative histone-lysine N-methyltransferase PRDM6 [Homo sapiens]           |                      |                                                                                            |                            |                                                                   |                                                                                           |
| <i>Adig-PRDM7/9a</i> | adi_v1.18285                                                                              | SET                                                 | 7/9                                                             | NP_001091643 probable histone-lysine N-methyltransferase PRDM7 isoform 1 [Homo sapiens] |                      |                                                                                            |                            |                                                                   |                                                                                           |
| <i>Adig-PRDM7/9b</i> | adi_v1.22563                                                                              | SET                                                 | 7/9                                                             | NP_001091643 probable histone-lysine N-methyltransferase PRDM7 isoform 1 [Homo sapiens] |                      |                                                                                            |                            |                                                                   |                                                                                           |
| <i>Adig-PRDM12</i>   | adi_v1.20377                                                                              | SET + 2 Zn-F                                        | 12                                                              | NP_067632 PR domain zinc finger protein 12 [Homo sapiens]                               |                      |                                                                                            |                            |                                                                   |                                                                                           |
| <i>Adig-PRDM13</i>   | adi_v1.02346                                                                              | 3 Zn-F                                              | 13                                                              | NP_067633 PR domain zinc finger protein 13 [Homo sapiens]                               |                      |                                                                                            |                            |                                                                   |                                                                                           |
| <i>Adig-PRDM14</i>   | adi_v1.15700                                                                              | 3 Zn-F                                              | 14                                                              | NP_078780 PR domain zinc finger protein 14 [Homo sapiens]                               |                      |                                                                                            |                            |                                                                   |                                                                                           |
| Cnidaria             | <i>Cnidaria; Hydrozoa; Hydroida; Anthomedusae; Hydridae; Hydra</i>                        | <i>Hydra magnipapillata</i>                         | NCBI/J. Craig Venter Institute and Doe Joint Genome Institute   | 7                                                                                       | <i>Hmag-PRDMX1</i>   | XP_002154805.1  PREDICTED: PR domain zinc finger protein 14-like                           | SET                        | Orphan                                                            | NP_067632 PR domain zinc finger protein 12 [Homo sapiens]                                 |
|                      |                                                                                           |                                                     |                                                                 |                                                                                         | <i>Hmag-PRDM6a</i>   | XP_002154573.2  PREDICTED: histone-lysine N-methyltransferase PRDM9-like                   | SET                        | 6                                                                 | NP_001129711 putative histone-lysine N-methyltransferase PRDM6 [Homo sapiens]             |
|                      |                                                                                           |                                                     |                                                                 |                                                                                         | <i>Hmag-PRDM7/9a</i> | XP_002165356.2  PREDICTED: zinc finger protein 624-like                                    | SET + 2 Zn-F               | 7/9                                                               | NP_061169 PR domain zinc finger protein 5 [Homo sapiens]                                  |
|                      |                                                                                           |                                                     |                                                                 |                                                                                         | <i>Hmag-PRDM6b</i>   | XP_002162271.2  PREDICTED: uncharacterized protein LOC100208645                            | SET                        | 6                                                                 | NP_001129711 putative histone-lysine N-methyltransferase PRDM6 [Homo sapiens]             |
|                      |                                                                                           |                                                     |                                                                 |                                                                                         | <i>Hmag-PRDM7/9b</i> | P_002166507.2  PREDICTED: histone-lysine N-methyltransferase PRDM9-like                    | SET                        | 7/9                                                               | NP_064612 histone-lysine N-methyltransferase PRDM9 [Homo sapiens]                         |
|                      |                                                                                           |                                                     |                                                                 |                                                                                         | <i>Hmag-PRDMX2</i>   | XP_002161305.2  PREDICTED: uncharacterized protein LOC100204011                            | -                          | Orphan                                                            | NP_061169 PR domain zinc finger protein 5 [Homo sapiens]                                  |

**Table S2: *Prdm* genes in non-bilaterians.**

| Taxa     | Species (common name)       | Source of the used sequences / Sequencing centers | # PRDM genes               | Genes              | Accession proteins                                       | Domains     | PRDM family  | Best Blast Hit Human                                      |                                                           |
|----------|-----------------------------|---------------------------------------------------|----------------------------|--------------------|----------------------------------------------------------|-------------|--------------|-----------------------------------------------------------|-----------------------------------------------------------|
|          |                             |                                                   |                            | <i>Hmag-PRDM13</i> | XP_002158638.1   PREDICTED: zinc finger protein 256-like | 1 Zn-F      | 13           | NP_067633 PR domain zinc finger protein 13 [Homo sapiens] |                                                           |
| Placozoa | <i>Placozoa; Trichoplax</i> | <i>Trichoplax adhaerens</i>                       | Doe Joint Genome Institute | 2                  | <i>Tadh-PRDM12</i>                                       | TriadP14897 | SET + 2 Zn-F | 12                                                        | NP_067632 PR domain zinc finger protein 12 [Homo sapiens] |
|          |                             |                                                   |                            |                    | <i>Tadh-PRDM13</i>                                       | TriadP56420 | SET + 1 Zn-F | 13                                                        | NP_067633 PR domain zinc finger protein 13 [Homo sapiens] |

**Table S3: Prdm genes in ecdysozoans.**

| Taxa       | Species (common name)                                                                                                                                                | Source of the used sequences / Sequencing centers        | # PRDM genes | Genes                 | Accession proteins                                                                      | Domains      | PRDM family | Best Blast Hit Human                                                           |
|------------|----------------------------------------------------------------------------------------------------------------------------------------------------------------------|----------------------------------------------------------|--------------|-----------------------|-----------------------------------------------------------------------------------------|--------------|-------------|--------------------------------------------------------------------------------|
| Nematoda   | <i>Nematoda; Chromadorea; Rhabditida; Rhabditoidea; Rhabditidae; Peloderinae; Caenorhabditis</i>                                                                     | <i>Caenorhabditis elegans</i>                            | 2            | <i>Cele-Prdm1</i>     | NP_001251370.1   Protein BLMP-1                                                         | SET + 3 Zn-F | 1           | NP_878911 PR domain zinc finger protein 1 isoform 2 [Homo sapiens]             |
|            |                                                                                                                                                                      |                                                          |              | <i>Cele-Prdm7/9</i>   | NP_495902.1   Protein SET-17                                                            | SET          | 7/9         | NP_064612 histone-lysine N-methyltransferase PRDM9 [Homo sapiens]              |
| Nematoda   | <i>Nematoda; Chromadorea; Diplogasterida; Neodiplogasterida; Pristionchus</i>                                                                                        | <i>Pristionchus pacificus</i>                            | 7            | <i>Ppac-PRDM1a</i>    | PPA04977                                                                                | 3 Zn-F       | 1           | NP_878911 PR domain zinc finger protein 1 isoform 2 [Homo sapiens]             |
|            |                                                                                                                                                                      |                                                          |              | <i>Ppac-PRDM1b</i>    | PPA04978                                                                                | SET          | 1           | NP_001189 PR domain zinc finger protein 1 isoform 1 [Homo sapiens]             |
|            |                                                                                                                                                                      |                                                          |              | <i>Ppac-PRDMX1</i>    | PPA07348                                                                                | 2 Zn-F       | Orphan      | NP_078780 PR domain zinc finger protein 14 [Homo sapiens]                      |
|            |                                                                                                                                                                      |                                                          |              | <i>Ppac-PRDM7/9</i>   | PPA28511                                                                                | -            | 7/9         | NP_064612 histone-lysine N-methyltransferase PRDM9 [Homo sapiens]              |
|            |                                                                                                                                                                      |                                                          |              | <i>Ppac-PRDM8</i>     | PPA27496                                                                                | -            | 8           | NP_001092873 PR domain zinc finger protein 8 [Homo sapiens]                    |
|            |                                                                                                                                                                      |                                                          |              | <i>Ppac-PRDMX2</i>    | PPA21110                                                                                | -            | Orphan      | NP_078780 PR domain zinc finger protein 14 [Homo sapiens]                      |
|            |                                                                                                                                                                      |                                                          |              | <i>Ppac-PRDMX3</i>    | PPA23527                                                                                | -            | Orphan      | NP_064614 PR domain-containing protein 11 [Homo sapiens]                       |
| Nematoda   | <i>Nematoda; Chromadorea; Spirurida; Filarioidea; Onchocercidae; Wuchereria</i>                                                                                      | <i>Wuchereria bancrofti</i>                              | 4            | <i>Wban-PRDM3/16</i>  | WUBG_02748T0   WUBG_02748   Wuchereria bancrofti hypothetical protein (414 aa)          | 2 Zn-F       | 3/16        | NP_001098548 MDS1 and EVI1 complex locus protein EVI1 isoform b [Homo sapiens] |
|            |                                                                                                                                                                      |                                                          |              | <i>Wban-PRDM1</i>     | WUBG_04696T0   WUBG_04696   Wuchereria bancrofti zinc finger protein (775 aa)           | SET + 3 Zn-F | 1           | NP_878911 PR domain zinc finger protein 1 isoform 2 [Homo sapiens]             |
|            |                                                                                                                                                                      |                                                          |              | <i>Wban-PRDM7/9</i>   | WUBG_11120T0   WUBG_11120   Wuchereria bancrofti hypothetical protein (111 aa)          | 1 Zn-F       | 7/9         | NP_078780 PR domain zinc finger protein 14 [Homo sapiens]                      |
|            |                                                                                                                                                                      |                                                          |              | <i>Wban-PRDMX</i>     | WUBG_11853T0   WUBG_11853   Wuchereria bancrofti SET domain-containing protein (189 aa) | SET          | Orphan      | NP_064612 histone-lysine N-methyltransferase PRDM9 [Homo sapiens]              |
| Nematoda   | <i>Nematoda; Chromadorea; Spirurida; Filarioidea; Onchocercidae; Brugia</i>                                                                                          | <i>Brugia malayi</i>                                     | 3            | <i>Bmal-PRDM3/16</i>  | Bm1_23070   Brugia malayi Zinc finger, C2H2 type family protein (523 aa)                | 2 Zn-F       | 3/16        | NP_001157472 MDS1 and EVI1 complex locus protein EVI1 isoform e [Homo sapiens] |
|            |                                                                                                                                                                      |                                                          |              | <i>Bmal-PRDM7/9</i>   | Bm1_23550   Brugia malayi SET domain containing protein (237 aa)                        | SET          | 7/9         | NP_064612 histone-lysine N-methyltransferase PRDM9 [Homo sapiens]              |
|            |                                                                                                                                                                      |                                                          |              | <i>Bmal-PRDM1</i>     | Bm1_57210   Brugia malayi Zinc finger, C2H2 type family protein (620 aa)                | SET + 3 Zn-F | 1           | NP_001189 PR domain zinc finger protein 1 isoform 1 [Homo sapiens]             |
| Nematoda   | <i>Nematoda; Chromadorea; Spirurida; Filarioidea; Onchocercidae; Loa</i>                                                                                             | <i>Loa loa (African eye worm)</i>                        | 4            | <i>Lloa-PRDM1a</i>    | LOAG_03767T0   LOAG_03767   Loa loa V3 hypothetical protein (384 aa)                    | SET          | 1           | NP_001189 PR domain zinc finger protein 1 isoform 1 [Homo sapiens]             |
|            |                                                                                                                                                                      |                                                          |              | <i>Lloa-PRDM1b</i>    | LOAG_11444T0   LOAG_11444   Loa loa V3 zinc finger protein (437 aa)                     | 3 Zn-F       | 1           | NP_001189 PR domain zinc finger protein 1 isoform 1 [Homo sapiens]             |
|            |                                                                                                                                                                      |                                                          |              | <i>Lloa-PRDM3/16</i>  | LOAG_01298T0   LOAG_01298   Loa loa V3 hypothetical protein (397 aa)                    | 2 Zn-F       | 3/16        | NP_071397 PR domain zinc finger protein 16 isoform 1 [Homo sapiens]            |
|            |                                                                                                                                                                      |                                                          |              | <i>Lloa-PRDM7/9</i>   | LOAG_06333T0   LOAG_06333   Loa loa V3 SET domain-containing protein (256 aa)           | SET          | 7/9         | NP_064612 histone-lysine N-methyltransferase PRDM9 [Homo sapiens]              |
| Nematoda   | <i>Nematoda; Enoplea; Enoplia; Trichocephalida; Trichinellidae; Trichinella</i>                                                                                      | <i>Trichinella spiralis</i>                              | 3            | <i>Tspi-PRDM1</i>     | EFV52614                                                                                | SET + 2 Zn-F | 1           | NP_878911 PR domain zinc finger protein 1 isoform 2 [Homo sapiens]             |
|            |                                                                                                                                                                      |                                                          |              | <i>Tspi-PRDM3/16</i>  | EFV51761                                                                                | 2 Zn-F       | 3/16        | NP_071397 PR domain zinc finger protein 16 isoform 1 [Homo sapiens]            |
|            |                                                                                                                                                                      |                                                          |              | <i>Tspi-PRDM13</i>    | EFV59777                                                                                | 1 Zn-F       | 13          | NP_067633 PR domain zinc finger protein 13 [Homo sapiens]                      |
| Arthropoda | <i>Arthropoda; Chelicerata; Arachnida; Acari; Parasitiformes; Mesostigmata; Monogynaspida; Dermansyina; Phytoseioidea; Phytoseiidae; Typhlodrominae; Metaseiulus</i> | <i>Metaseiulus occidentalis (western predatory mite)</i> | 4            | <i>Mocc-PRDM1</i>     | XP_003738192.1   PREDICTED: PR domain zinc finger protein 1-like                        | SET + 4 Zn-F | 1           | NP_001189 PR domain zinc finger protein 1 isoform 1 [Homo sapiens]             |
|            |                                                                                                                                                                      |                                                          |              | <i>Mocc-PRDM3/16</i>  | XP_003743927.1   PREDICTED: uncharacterized protein LOC100908931                        | 2 Zn-F       | 3/16        | NP_004982 MDS1 and EVI1 complex locus protein EVI1 isoform c [Homo sapiens]    |
|            |                                                                                                                                                                      |                                                          |              | <i>Mocc-PRDM8</i>     | XP_003745172.1   PREDICTED: uncharacterized protein LOC100905056                        | 1 Zn-F       | 8           | NP_001092873 PR domain zinc finger protein 8 [Homo sapiens]                    |
|            |                                                                                                                                                                      |                                                          |              | <i>Mocc-PRDM13</i>    | XP_003747800.1   PREDICTED: PR domain zinc finger protein 13-like                       | 1 Zn-F       | 13          | NP_067633 PR domain zinc finger protein 13 [Homo sapiens]                      |
| Arthropoda | <i>Arthropoda; Chelicerata; Arachnida; Acari; Parasitiformes; Ixodida; Ixodoidea; Ixodidae; Ixodinae; Ixodes</i>                                                     | <i>Ixodes scapularis (black-legged tick)</i>             | 5            | <i>Isca-PRDM3/16</i>  | XP_002403863.1   hypothetical protein IseW_ISCW010781                                   | 3 Zn-F       | 3/16        | NP_001157472 MDS1 and EVI1 complex locus protein EVI1 isoform e [Homo sapiens] |
|            |                                                                                                                                                                      |                                                          |              | <i>Isca-PRDM8</i>     | XP_002409297.1   hypothetical protein IseW_ISCW009928                                   | -            | 8           | NP_001092873 PR domain zinc finger protein 8 [Homo sapiens]                    |
|            |                                                                                                                                                                      |                                                          |              | <i>Isca-PRDM10/15</i> | XP_002400869.1   zinc finger protein, putative                                          | SET + 1 Zn-F | 10/15       | NP_064613 PR domain zinc finger protein 10 isoform 1 [Homo sapiens]            |
|            |                                                                                                                                                                      |                                                          |              | <i>Isca-PRDM12</i>    | XP_002399836.1   conserved hypothetical protein                                         | SET + 1 Zn-F | 12          | NP_067632 PR domain zinc finger protein 12 [Homo sapiens]                      |
|            |                                                                                                                                                                      |                                                          |              | <i>Isca-PRDM13</i>    | XP_002413395.1   zinc finger protein, putative                                          | -            | 13          | NP_067633 PR domain zinc finger protein 13 [Homo sapiens]                      |
| Arthropoda | <i>Arthropoda; Chelicerata; Tetranychus</i>                                                                                                                          | <i>Tetranychus urticae</i>                               | 5            | <i>Turt-PRDM13</i>    | tetur10g01540.1                                                                         | 1 Zn-F       | 13          | NP_067633 PR domain zinc finger protein 13 [Homo sapiens]                      |

**Table S3: Prdm genes in ecdysozoans.**

| Taxa                                                                                                                                        | Species (common name)                                                                                                                                                                                                                                                                        | Source of the used sequences / Sequencing centers                  | # PRDM genes | Genes                  | Accession proteins                                               | Domains      | PRDM family | Best Blast Hit Human                                                                            |
|---------------------------------------------------------------------------------------------------------------------------------------------|----------------------------------------------------------------------------------------------------------------------------------------------------------------------------------------------------------------------------------------------------------------------------------------------|--------------------------------------------------------------------|--------------|------------------------|------------------------------------------------------------------|--------------|-------------|-------------------------------------------------------------------------------------------------|
| <i>Arachnida; Acari; Acariformes; Trombidiformes; Prostigmata; Eleutherengona; Raphignathae; Tetranychoidae; Tetranychidae; Tetranychus</i> | <i>(two-spotted spider mite)</i>                                                                                                                                                                                                                                                             | Ghent University                                                   |              | <i>Turt-PRDM8</i>      | tetur11g03890.1                                                  | 1 Zn-F       | 8           | NP_001092873 PR domain zinc finger protein 8 [Homo sapiens]                                     |
|                                                                                                                                             |                                                                                                                                                                                                                                                                                              |                                                                    |              | <i>Turt-PRDM1a</i>     | tetur15g00070.1                                                  | 2 Zn-F       | 1           | NP_001189 PR domain zinc finger protein 1 isoform 1 [Homo sapiens]                              |
|                                                                                                                                             |                                                                                                                                                                                                                                                                                              |                                                                    |              | <i>Turt-PRDM1b</i>     | tetur15g00080.1                                                  | SET + 4 Zn-F | 1           | NP_878911 PR domain zinc finger protein 1 isoform 2 [Homo sapiens]                              |
|                                                                                                                                             |                                                                                                                                                                                                                                                                                              |                                                                    |              | <i>Turt-PRDM3/16</i>   | tetur15g03100.1                                                  | 2 Zn-F       | 3/16        | NP_004982 MDS1 and EVI1 complex locus protein EVI1 isoform c [Homo sapiens]                     |
| Arthropoda                                                                                                                                  | <i>Arthropoda; Mandibulata; Myriapoda; Chilopoda; Pleurostigmophora; Epimorpha; Geophilomorpha; Linotaeniidae; Strigamia</i>                                                                                                                                                                 | Human Genome Sequencing Center - Baylor College of Medicine        | 13           | <i>Smar-PRDM1</i>      | SMAR011793-PA                                                    | SET + 3 Zn-F | 1           | NP_001189 PR domain zinc finger protein 1 isoform 1 [Homo sapiens]                              |
|                                                                                                                                             |                                                                                                                                                                                                                                                                                              |                                                                    |              | <i>Smar-PRDM7/9</i>    | SMAR010638-PA                                                    | 2 Zn-F       | 7/9         | NP_064612 histone-lysine N-methyltransferase PRDM9 [Homo sapiens]                               |
|                                                                                                                                             |                                                                                                                                                                                                                                                                                              |                                                                    |              | <i>Smar-PRDM12</i>     | SMAR003406-PA                                                    | SET + 1 Zn-F | 12          | NP_067632 PR domain zinc finger protein 12 [Homo sapiens]                                       |
|                                                                                                                                             |                                                                                                                                                                                                                                                                                              |                                                                    |              | <i>Smar-PRDM4</i>      | SMAR013152-PA                                                    | SET + 2 Zn-F | 4           | NP_036538 PR domain zinc finger protein 4 [Homo sapiens]                                        |
|                                                                                                                                             |                                                                                                                                                                                                                                                                                              |                                                                    |              | <i>Smar-PRDMX1</i>     | SMAR007571-PA                                                    | SET          | Orphan      | NP_036538 PR domain zinc finger protein 4 [Homo sapiens]                                        |
|                                                                                                                                             |                                                                                                                                                                                                                                                                                              |                                                                    |              | <i>Smar-PRDM10/15a</i> | SMAR008196-PA                                                    | SET + 1 Zn-F | 10/15       | NP_955469 PR domain zinc finger protein 10 isoform 2 [Homo sapiens]                             |
|                                                                                                                                             |                                                                                                                                                                                                                                                                                              |                                                                    |              | <i>Smar-PRDM3/16</i>   | SMAR011141-PA                                                    | 3 Zn-F       | 3/16        | NP_004982 MDS1 and EVI1 complex locus protein EVI1 isoform c [Homo sapiens]                     |
|                                                                                                                                             |                                                                                                                                                                                                                                                                                              |                                                                    |              | <i>Smar-PRDM10/15b</i> | SMAR015625-PA                                                    | 1 Zn-F       | 10/15       | NP_001035514 PR domain zinc finger protein 15 isoform 2 [Homo sapiens]                          |
|                                                                                                                                             |                                                                                                                                                                                                                                                                                              |                                                                    |              | <i>Smar-PRDM13a</i>    | SMAR008272-PA                                                    | 1 Zn-F       | 13          | NP_067633 PR domain zinc finger protein 13 [Homo sapiens]                                       |
|                                                                                                                                             |                                                                                                                                                                                                                                                                                              |                                                                    |              | <i>Smar-PRDM8</i>      | SMAR006435-PA                                                    | SET + 1 Zn-F | 8           | NP_001092873 PR domain zinc finger protein 8 [Homo sapiens]                                     |
|                                                                                                                                             |                                                                                                                                                                                                                                                                                              |                                                                    |              | <i>Smar-PRDM13b</i>    | SMAR010327-PA                                                    | 1 Zn-F       | 13          | NP_067633 PR domain zinc finger protein 13 [Homo sapiens]                                       |
|                                                                                                                                             |                                                                                                                                                                                                                                                                                              |                                                                    |              | <i>Smar-PRDM10/15c</i> | SMAR013836-PA                                                    | -            | 10/15       | NP_001035514 PR domain zinc finger protein 15 isoform 2 [Homo sapiens]                          |
|                                                                                                                                             |                                                                                                                                                                                                                                                                                              |                                                                    |              | <i>Smar-PRDMX2</i>     | SMAR001098-PA                                                    | -            | Orphan      | NP_064612 histone-lysine N-methyltransferase PRDM9 [Homo sapiens]                               |
| Arthropoda                                                                                                                                  | <i>Arthropoda; Mandibulata; Pancrustacea; Crustacea; Branchiopoda; Phyllopoada; Diplostraca; Cladocera; Anomopoda; Daphniidae; Daphnia</i>                                                                                                                                                   | Doe Joint Genome Institute                                         | 4            | <i>Dpul_PRDM1</i>      | JGI_V11_34713 jgi Dappu1 34713 gw1.29.298.1                      | SET + 2 Zn-F | 1           | NP_001189 PR domain zinc finger protein 1 isoform 1 [Homo sapiens]                              |
|                                                                                                                                             |                                                                                                                                                                                                                                                                                              |                                                                    |              | <i>Dpul_PRDM3/16</i>   | JGI_V11_14809 jgi Dappu1 14809 gw1.106.42.1                      | 1 Zn-F       | 3/16        | NP_001157472 MDS1 and EVI1 complex locus protein EVI1 isoform e [Homo sapiens]                  |
|                                                                                                                                             |                                                                                                                                                                                                                                                                                              |                                                                    |              | <i>Dpul_PRDM8</i>      | JGI_V11_28712 jgi Dappu1 28712 gw1.39.153.1                      | -            | 8           | NP_001092873 PR domain zinc finger protein 8 [Homo sapiens]                                     |
|                                                                                                                                             |                                                                                                                                                                                                                                                                                              |                                                                    |              | <i>Dpul_PRDM13</i>     | JGI_V11_59850 jgi Dappu1 59850 e_gw1.86.80.1                     | 1 Zn-F       | 13          | NP_067633 PR domain zinc finger protein 13 [Homo sapiens]                                       |
| Arthropoda                                                                                                                                  | <i>Arthropoda; Mandibulata; Pancrustacea; Hexapoda; Insecta; Dicondylia; Pterygota; Neoptera; Paraneoptera; Phthiraptera; Anoplura; Pediculidae; Pediculus</i>                                                                                                                               | NCBI / J. Craig Venter Institute                                   | 6            | <i>Phum-PRDM1</i>      | XP_002432966.1 zmf683, putative                                  | SET + 4 Zn-F | 1           | NP_001189 PR domain zinc finger protein 1 isoform 1 [Homo sapiens]                              |
|                                                                                                                                             |                                                                                                                                                                                                                                                                                              |                                                                    |              | <i>Phum-PRDM3/16a</i>  | XP_002430717.1  conserved hypothetical protein                   | 3 Zn-F       | 3/16        | NP_001157472 MDS1 and EVI1 complex locus protein EVI1 isoform e [Homo sapiens]                  |
|                                                                                                                                             |                                                                                                                                                                                                                                                                                              |                                                                    |              | <i>Phum-PRDM3/16b</i>  | XP_002430718.1  conserved hypothetical protein                   | 2 Zn-F       | 3/16        | NP_955533 PR domain zinc finger protein 16 isoform 2 [Homo sapiens]                             |
|                                                                                                                                             |                                                                                                                                                                                                                                                                                              |                                                                    |              | <i>Phum-PRDM8</i>      | XP_002426750.1  conserved hypothetical protein                   | 1 Zn-F       | 8           | NP_001092873 PR domain zinc finger protein 8 [Homo sapiens]                                     |
|                                                                                                                                             |                                                                                                                                                                                                                                                                                              |                                                                    |              | <i>Phum-PRDM10/15</i>  | XP_002427882.1  hypothetical protein Phum_PHUM351450             | 1 Zn-F       | 10/15       | NP_955469 PR domain zinc finger protein 10 isoform 2 [Homo sapiens]                             |
|                                                                                                                                             |                                                                                                                                                                                                                                                                                              |                                                                    |              | <i>Phum-PRDM13</i>     | XP_002432944.1  pr-domain zinc finger protein, putative          | -            | 13          | NP_067633 PR domain zinc finger protein 13 [Homo sapiens]                                       |
| Arthropoda                                                                                                                                  | <i>Arthropoda; Mandibulata; Pancrustacea; Hexapoda; Insecta; Dicondylia; Pterygota; Neoptera; Paraneoptera; Hemiptera; Sternorrhyncha; Aphidiformes; Aphidomorpha; Aphidoidea; Aphididae; Aphidinae; Macrosiphini; Acyrthosiphon</i>                                                         | NCBI / Human Genome Sequencing Center - Baylor College of Medicine | 5            | <i>Apis-PDM1</i>       | XP_003240564.1  PREDICTED: hypothetical protein LOC100159482     | 3 Zn-F       | 1           | NP_001189 PR domain zinc finger protein 1 isoform 1 [Homo sapiens]                              |
|                                                                                                                                             |                                                                                                                                                                                                                                                                                              |                                                                    |              | <i>Apis-PRDM3/16a</i>  | XP_001945435.2  PREDICTED: PR domain zinc finger protein 16-like | 2 Zn-F       | 3/16        | NP_004982 MDS1 and EVI1 complex locus protein EVI1 isoform c [Homo sapiens]                     |
|                                                                                                                                             |                                                                                                                                                                                                                                                                                              |                                                                    |              | <i>Apis-PRDM3/16b</i>  | XP_001947307.2  PREDICTED: hypothetical protein LOC100167703     | 2 Zn-F       | 3/16        | XP_003120624 PREDICTED: PR domain zinc finger protein 16-like isoform 2, partial [Homo sapiens] |
|                                                                                                                                             |                                                                                                                                                                                                                                                                                              |                                                                    |              | <i>Apis-PRDM8</i>      | XP_003240182.1  PREDICTED: hypothetical protein LOC100167146     | -            | 8           | NP_001092873 PR domain zinc finger protein 8 [Homo sapiens]                                     |
|                                                                                                                                             |                                                                                                                                                                                                                                                                                              |                                                                    |              | <i>Apis-PRDM10/15</i>  | XP_003244166.1  PREDICTED: hypothetical protein LOC100573973     | -            | 10/15       | NP_955471 PR domain zinc finger protein 10 isoform 4 [Homo sapiens]                             |
| Arthropoda                                                                                                                                  | <i>Arthropoda; Mandibulata; Pancrustacea; Hexapoda; Insecta; Dicondylia; Pterygota; Neoptera; Paraneoptera; Hemiptera; Euhemiptera; Neohemiptera; Prosorrhyncha; Heteroptera; Euheteroptera; Neoheteroptera; Panheteroptera; Cimicomorpha; Reduviidae; Reduviidae; Triatominae; Rhodnius</i> | EnsemblMetazoa / The Genome Institute at Washington University     | 4            | <i>Rpro-PRDM3_16a</i>  | RPRC011891-PA                                                    | 3 Zn-F       | 3/16        | NP_955533 PR domain zinc finger protein 16 isoform 2 [Homo sapiens]                             |
|                                                                                                                                             |                                                                                                                                                                                                                                                                                              |                                                                    |              | <i>Rpro-PRDM13</i>     | RPRC014451-PA                                                    | 1 Zn-F       | 13          | NP_067633 PR domain zinc finger protein 13 [Homo sapiens]                                       |
|                                                                                                                                             |                                                                                                                                                                                                                                                                                              |                                                                    |              | <i>Rpro-PRDM10/15</i>  | RPRC015184-PA                                                    | -            | 10/15       | NP_064613 PR domain zinc finger protein 10 isoform 1 [Homo sapiens]                             |
|                                                                                                                                             |                                                                                                                                                                                                                                                                                              |                                                                    |              | <i>Rpro-PRDM1</i>      | RPRC001983-PA                                                    |              | 1           | NP_001189 PR domain zinc finger protein 1 isoform 1 [Homo sapiens]                              |
| Arthropoda                                                                                                                                  | <i>Arthropoda; Mandibulata; Pancrustacea; Hexapoda;</i>                                                                                                                                                                                                                                      | NCBI / Broad Institute and The Institute for Genomic               | 4            | <i>Aaeg-PRDM1</i>      | XP_001663975.1  zinc finger protein [Aedes aegypti]              | SET + 3 Zn-F | 1           | NP_001189 PR domain zinc finger protein 1 isoform 1 [Homo sapiens]                              |

**Table S3: Prdm genes in ecdysozoans.**

| Taxa                                                                                                                                                                                                                                                    | Species (common name)                                   | Source of the used sequences / Sequencing centers                                  | # PRDM genes | Genes                                                     | Accession proteins                                                               | Domains      | PRDM family | Best Blast Hit Human                                                           |
|---------------------------------------------------------------------------------------------------------------------------------------------------------------------------------------------------------------------------------------------------------|---------------------------------------------------------|------------------------------------------------------------------------------------|--------------|-----------------------------------------------------------|----------------------------------------------------------------------------------|--------------|-------------|--------------------------------------------------------------------------------|
| Insecta; Dicondylia; Pterygota; Neoptera; Endopterygota; Diptera; Nematocera; Culicimorpha; Culicoidea; Culicidae; Culicinae; Aedini; Aedes; Stegomyia                                                                                                  | mosquito                                                | Research                                                                           |              | <i>Aaeg-PRDM3/16b</i>                                     | XP_001657808.1  hypothetical protein AaeL_AAEL006442 [Aedes aegypti]             | 2 Zn-F       | 3/16        | NP_001157471 MDS1 and EVI1 complex locus protein EVI1 isoform d [Homo sapiens] |
|                                                                                                                                                                                                                                                         |                                                         |                                                                                    |              | <i>Aaeg-PRDM8</i>                                         | XP_001657036.1  hypothetical protein AaeL_AAEL003602 [Aedes aegypti]             | 2 Zn-F       | 8           | NP_001092873 PR domain zinc finger protein 8 [Homo sapiens]                    |
|                                                                                                                                                                                                                                                         |                                                         |                                                                                    |              | <i>Aaeg-PRDM13</i>                                        | XP_001660252.1  hypothetical protein AaeL_AAEL001736 [Aedes aegypti]             | 1 Zn-F       | 13          | NP_067633 PR domain zinc finger protein 13 [Homo sapiens]                      |
| Arthropoda; Mandibulata; Pancrustacea; Hexapoda; Insecta; Dicondylia; Pterygota; Neoptera; Endopterygota; Diptera; Nematocera; Culicimorpha; Culicoidea; Culicidae; Culicinae; Culicini; Culex; Culex; Culex pipiens complex                            | <i>Culex quinquefasciatus</i> (Southern House Mosquito) | NCBI / Broad Institute and J. Craig Venter Institute                               | 6            | <i>Cqui-PRDM1</i>                                         | XP_001849050.1  blimp-1                                                          | SET + 3 Zn-F | 1           | NP_001189 PR domain zinc finger protein 1 isoform 1 [Homo sapiens]             |
|                                                                                                                                                                                                                                                         |                                                         |                                                                                    |              | <i>Cqui-PRDM3/16a1</i>                                    | XP_001862948.1  conserved hypothetical protein                                   | 2 Zn-F       | 3/16        | NP_004982 MDS1 and EVI1 complex locus protein EVI1 isoform c [Homo sapiens]    |
|                                                                                                                                                                                                                                                         |                                                         |                                                                                    |              | <i>Cqui-PRDM3/16b</i>                                     | XP_001851003.1  conserved hypothetical protein                                   | 2 Zn-F       | 3/16        | NP_001157471 MDS1 and EVI1 complex locus protein EVI1 isoform d [Homo sapiens] |
|                                                                                                                                                                                                                                                         |                                                         |                                                                                    |              | <i>Cqui-PRDM3/16a2</i>                                    | [XP_001850133.1  conserved hypothetical protein                                  | 1 Zn-F       | 3/16        | NP_001157472 MDS1 and EVI1 complex locus protein EVI1 isoform e [Homo sapiens] |
|                                                                                                                                                                                                                                                         |                                                         |                                                                                    |              | <i>Cqui-PRDM8</i>                                         | XP_001846604.1  conserved hypothetical protein                                   | 2 Zn-F       | 8           | NP_001092873 PR domain zinc finger protein 8 [Homo sapiens]                    |
| <i>Cqui-PRDM13</i>                                                                                                                                                                                                                                      | XP_001866493.1  conserved hypothetical protein          | 1 Zn-F                                                                             | 13           | NP_067633 PR domain zinc finger protein 13 [Homo sapiens] |                                                                                  |              |             |                                                                                |
| Arthropoda; Mandibulata; Pancrustacea; Hexapoda; Insecta; Dicondylia; Pterygota; Neoptera; Brachyoptera; Muscomorpha; Eremoneura; Cyclorrhapha; Schizophora; Acalyptata; Ephydroidea; Drosophilidae; Drosophilinae; Drosophilini; Drosophila            | <i>Drosophila melanogaster</i>                          | NCBI / Berkeley Drosophila Genome Project                                          | 5            | <i>Dmel-PRDM1</i>                                         | NP_001261442.1  Blimp-1                                                          | SET + 3 Zn-F | 1           | NP_878911 PR domain zinc finger protein 1 isoform 2 [Homo sapiens]             |
|                                                                                                                                                                                                                                                         |                                                         |                                                                                    |              | <i>Dmel-PRDM3/16a</i>                                     | NP_001246081.1  hamlet                                                           | 2 Zn-F       | 3/16        | NP_001157472 MDS1 and EVI1 complex locus protein EVI1 isoform e [Homo sapiens] |
|                                                                                                                                                                                                                                                         |                                                         |                                                                                    |              | <i>Dmel-PRDM3/16b</i>                                     | NP_609904.2  CG10348                                                             | 2 Zn-F       | 3/16        | NP_001157471 MDS1 and EVI1 complex locus protein EVI1 isoform d [Homo sapiens] |
|                                                                                                                                                                                                                                                         |                                                         |                                                                                    |              | <i>Dmel-PRDM8</i>                                         | NP_001261454.1  CG13287                                                          | 2 Zn-F       | 8           | NP_001092873 PR domain zinc finger protein 8 [Homo sapiens]                    |
|                                                                                                                                                                                                                                                         |                                                         |                                                                                    |              | <i>Dmel-PRDM13</i>                                        | NP_648032.1  CG13296                                                             | 2 Zn-F       | 13          | NP_067633 PR domain zinc finger protein 13 [Homo sapiens]                      |
| Arthropoda; Mandibulata; Pancrustacea; Hexapoda; Insecta; Dicondylia; Pterygota; Neoptera; Endopterygota; Diptera; Brachycera; Muscomorpha; Eremoneura; Cyclorrhapha; Schizophora; Acalyptata; Tephritidae; Dacinae; Ceratitidini; Ceratitis; Ceratitis | <i>Ceratitis capitata</i> (Mediterranean fruit fly)     | NCBI / Human Genome Sequencing Center - Baylor College of Medicine                 | 4            | <i>Ccap-PRDM1</i>                                         | XP_004523786.1  PREDICTED: PR domain zinc finger protein 1-like                  | SET + 3 Zn-F | 1           | NP_001189 PR domain zinc finger protein 1 isoform 1 [Homo sapiens]             |
|                                                                                                                                                                                                                                                         |                                                         |                                                                                    |              | <i>Ccap-PRDM3/16a</i>                                     | XP_004533307.1  PREDICTED: transcription factor hamlet-like                      | 3 Zn-F       | 3/16        | NP_004982 MDS1 and EVI1 complex locus protein EVI1 isoform c [Homo sapiens]    |
|                                                                                                                                                                                                                                                         |                                                         |                                                                                    |              | <i>Ccap-PRDM8</i>                                         | XP_004526269.1  PREDICTED: homeotic protein spalt-major-like                     | 1 Zn-F       | 8           | NP_001092873 PR domain zinc finger protein 8 [Homo sapiens]                    |
|                                                                                                                                                                                                                                                         |                                                         |                                                                                    |              | <i>Ccap-PRDM13</i>                                        | XP_004524607.1  PREDICTED: transcription factor Sp4-like                         | 1 Zn-F       | 13          | NP_067633 PR domain zinc finger protein 13 [Homo sapiens]                      |
| Arthropoda; Mandibulata; Pancrustacea; Hexapoda; Insecta; Dicondylia; Pterygota; Neoptera; Endopterygota; Hymenoptera; Apocrita; Aculeata; Vespoidea; Formicidae; Myrmicinae; Attini; Atta                                                              | <i>Atta cephalotes</i> (leaf-cutter ant)                | EnsemblMetazoa / The Genome Institute at Washington University                     | 7            | <i>Acep-PRDM1</i>                                         | ACEP_00011370-PA                                                                 | SET + 4 Zn-F | 1           | NP_001189 PR domain zinc finger protein 1 isoform 1 [Homo sapiens]             |
|                                                                                                                                                                                                                                                         |                                                         |                                                                                    |              | <i>Acep-PRDMX</i>                                         | ACEP_00015009-PA                                                                 | SET          | Orphan      | NP_036538 PR domain zinc finger protein 4 [Homo sapiens]                       |
|                                                                                                                                                                                                                                                         |                                                         |                                                                                    |              | <i>Acep-PRDM3/16a1</i>                                    | ACEP_00004178-PA                                                                 | 2 Zn-F       | 3/16        | NP_001157471 MDS1 and EVI1 complex locus protein EVI1 isoform d [Homo sapiens] |
|                                                                                                                                                                                                                                                         |                                                         |                                                                                    |              | <i>Acep-PRDM3/16a2</i>                                    | ACEP_00004175-PA                                                                 | 2 Zn-F       | 3/16        | NP_001157472 MDS1 and EVI1 complex locus protein EVI1 isoform e [Homo sapiens] |
|                                                                                                                                                                                                                                                         |                                                         |                                                                                    |              | <i>Acep-PRDM10/15</i>                                     | ACEP_00002360-PA                                                                 | SET          | 10/15       | NP_955469 PR domain zinc finger protein 10 isoform 2 [Homo sapiens]            |
|                                                                                                                                                                                                                                                         |                                                         |                                                                                    |              | <i>Acep-PRDM8</i>                                         | ACEP_00008935-PA                                                                 | 1 Zn-F       | 8           | NP_001092873 PR domain zinc finger protein 8 [Homo sapiens]                    |
|                                                                                                                                                                                                                                                         |                                                         |                                                                                    |              | <i>Acep-PRDM13</i>                                        | ACEP_00008621-PA                                                                 | 1 Zn-F       | 13          | NP_067633 PR domain zinc finger protein 13 [Homo sapiens]                      |
| Arthropoda; Mandibulata; Pancrustacea; Hexapoda; Insecta; Dicondylia; Pterygota; Neoptera; Endopterygota; Hymenoptera; Apocrita; Aculeata; Apoidea; Megachilidae; Megachilinae; Megachilini; Megachile                                                  | <i>Megachile rotundata</i> (alfalfa leafcutting bee)    | NCBI / Center for Bioinformatics and Computational Biology, University of Maryland | 4            | <i>Mrot-PRDM1</i>                                         | XP_003699199.1  PREDICTED: uncharacterized protein LOC100877382                  | SET + 4 Zn-F | 1           | NP_001189 PR domain zinc finger protein 1 isoform 1 [Homo sapiens]             |
|                                                                                                                                                                                                                                                         |                                                         |                                                                                    |              | <i>Mrot-PRDM8</i>                                         | XP_003699750.1  PREDICTED: uncharacterized protein LOC100883161                  | 1 Zn-F       | 8           | NP_001092873 PR domain zinc finger protein 8 [Homo sapiens]                    |
|                                                                                                                                                                                                                                                         |                                                         |                                                                                    |              | <i>Mrot-PRDM10/15</i>                                     | XP_003708393.1  PREDICTED: PR domain zinc finger protein 5-like isoform 2        | SET          | 10/15       | NP_064613 PR domain zinc finger protein 10 isoform 1 [Homo sapiens]            |
|                                                                                                                                                                                                                                                         |                                                         |                                                                                    |              | <i>Mrot-PRDM13</i>                                        | XP_003707091.1  PREDICTED: zinc finger protein 672-like                          | 1 Zn-F       | 13          | NP_067633 PR domain zinc finger protein 13 [Homo sapiens]                      |
| Arthropoda; Mandibulata; Pancrustacea; Hexapoda; Insecta; Dicondylia; Pterygota; Neoptera; Endopterygota; Hymenoptera; Apocrita; Aculeata; Apoidea; Apidae; Bombinae; Bombini; Bombus; Bombus                                                           | <i>Bombus terrestris</i> (Buff-tailed Bumblebee)        | NCBI / Human Genome Sequencing Center - Baylor College of Medicine                 | 6            | <i>Bter-PRDM1</i>                                         | XP_003398307.1  PREDICTED: hypothetical protein LOC100650488                     | SET + 4 Zn-F | 1           | NP_001189 PR domain zinc finger protein 1 isoform 1 [Homo sapiens]             |
|                                                                                                                                                                                                                                                         |                                                         |                                                                                    |              | <i>Bter-PRDM10/15</i>                                     | XP_003402414.1  PREDICTED: PR domain zinc finger protein 10-like isoform 1       | SET          | 10/15       | NP_064613 PR domain zinc finger protein 10 isoform 1 [Homo sapiens]            |
|                                                                                                                                                                                                                                                         |                                                         |                                                                                    |              | <i>Bter-PRDM13</i>                                        | XP_003398139.1  PREDICTED: zinc finger protein 672-like                          | 2 Zn-F       | 13          | NP_067633 PR domain zinc finger protein 13 [Homo sapiens]                      |
|                                                                                                                                                                                                                                                         |                                                         |                                                                                    |              | <i>Bter-PRDM3/16a1</i>                                    | XP_003394267.1  PREDICTED: LOW QUALITY PROTEIN: transcription factor hamlet-like | SET + 3 Zn-F | 3/16        | NP_004982 MDS1 and EVI1 complex locus protein EVI1 isoform c [Homo sapiens]    |

**Table S3: Prdm genes in ecdysozoans.**

| Taxa       | Species (common name)                                                                                                                                                                                                                                                    | Source of the used sequences / Sequencing centers | # PRDM genes | Genes                                                                                    | Accession proteins                                            | Domains                                                                                  | PRDM family  | Best Blast Hit Human                                                           |                                                                                |
|------------|--------------------------------------------------------------------------------------------------------------------------------------------------------------------------------------------------------------------------------------------------------------------------|---------------------------------------------------|--------------|------------------------------------------------------------------------------------------|---------------------------------------------------------------|------------------------------------------------------------------------------------------|--------------|--------------------------------------------------------------------------------|--------------------------------------------------------------------------------|
|            |                                                                                                                                                                                                                                                                          |                                                   |              | <i>Bter-PRDM3/16a2</i>                                                                   | XP_003394396.1   PREDICTED: hypothetical protein LOC100646056 | 2 Zn-F                                                                                   | 3/16         | NP_001157472 MDS1 and EVI1 complex locus protein EVI1 isoform e [Homo sapiens] |                                                                                |
|            |                                                                                                                                                                                                                                                                          |                                                   |              | <i>Bter-PRDM8</i>                                                                        | XP_003398297.1   PREDICTED: hypothetical protein LOC100649145 | 1 Zn-F                                                                                   | 8            | NP_001092873 PR domain zinc finger protein 8 [Homo sapiens]                    |                                                                                |
| Arthropoda | <i>Arthropoda: Mandibulata; Pancrustacea; Hexapoda; Insecta; Dicondylia; Pterygota; Neoptera; Endopterygota; Hymenoptera; Apocrita; Aculeata; Apoidea; Apidae; Bombinae; Bombini; Bombus; Pyrobombus</i>                                                                 | <i>Bombus impatiens</i>                           | 6            | NCBI / Biotechnology Center, University of Illinois                                      | <i>Bimp-PRDM1</i>                                             | XP_003492727.1   PREDICTED: hypothetical protein LOC100741638                            | SET + 4 Zn-F | 1                                                                              | NP_001189 PR domain zinc finger protein 1 isoform 1 [Homo sapiens]             |
|            |                                                                                                                                                                                                                                                                          |                                                   |              |                                                                                          | <i>Bimp-PRDM10/15</i>                                         | XP_003486673.1   PREDICTED: PR domain zinc finger protein 10-like isoform 1              | SET          | 10/15                                                                          | NP_064613 PR domain zinc finger protein 10 isoform 1 [Homo sapiens]            |
|            |                                                                                                                                                                                                                                                                          |                                                   |              |                                                                                          | <i>Bimp-PRDM13</i>                                            | XP_003492409.1   PREDICTED: hypothetical protein LOC100743194                            | 1 Zn-F       | 13                                                                             | NP_067633 PR domain zinc finger protein 13 [Homo sapiens]                      |
|            |                                                                                                                                                                                                                                                                          |                                                   |              |                                                                                          | <i>Bimp-PRDM3/16a1</i>                                        | XP_003494773.1   PREDICTED: LOW QUALITY PROTEIN: transcription factor hamlet-like        | SET + 3 Zn-F | 3/16                                                                           | NP_004982 MDS1 and EVI1 complex locus protein EVI1 isoform c [Homo sapiens]    |
|            |                                                                                                                                                                                                                                                                          |                                                   |              |                                                                                          | <i>Bimp-PRDM3/16a2</i>                                        | XP_003490881.1   PREDICTED: hypothetical protein LOC100748733                            | 2 Zn-F       | 3/16                                                                           | NP_001157472 MDS1 and EVI1 complex locus protein EVI1 isoform e [Homo sapiens] |
|            |                                                                                                                                                                                                                                                                          |                                                   |              |                                                                                          | <i>Bimp-PRDM8</i>                                             | XP_003485998.1   PREDICTED: hypothetical protein LOC100743174                            | 1 Zn-F       | 8                                                                              | NP_001092873 PR domain zinc finger protein 8 [Homo sapiens]                    |
| Arthropoda | <i>Arthropoda: Mandibulata; Pancrustacea; Hexapoda; Insecta; Dicondylia; Pterygota; Neoptera; Endopterygota; Hymenoptera; Apocrita; Aculeata; Apoidea; Apidae; Apinae; Apini; Apis</i>                                                                                   | <i>Apis mellifera (western honey bee)</i>         | 4            | NCBI / Human Genome Sequencing Center - Baylor College of Medicine                       | <i>Amel-PRDM1</i>                                             | XP_391847.3   PREDICTED: hypothetical protein LOC408295                                  | SET + 3 Zn-F | 1                                                                              | NP_001189 PR domain zinc finger protein 1 isoform 1 [Homo sapiens]             |
|            |                                                                                                                                                                                                                                                                          |                                                   |              |                                                                                          | <i>Amel-PRDM3/16a</i>                                         | XP_001121599.2   PREDICTED: hypothetical protein LOC725792                               | SET + 4 Zn-F | 3/16                                                                           | NP_004982 MDS1 and EVI1 complex locus protein EVI1 isoform c [Homo sapiens]    |
|            |                                                                                                                                                                                                                                                                          |                                                   |              |                                                                                          | <i>Amel-PRDM8</i>                                             | [XP_001120809.1]   PREDICTED: hypothetical protein LOC724908                             | 1 Zn-F       | 8                                                                              | NP_001092873 PR domain zinc finger protein 8 [Homo sapiens]                    |
|            |                                                                                                                                                                                                                                                                          |                                                   |              |                                                                                          | <i>Amel-PRDM10/15</i>                                         | XP_396029.4   PREDICTED: PR domain zinc finger protein 10-like                           | SET          | 10/15                                                                          | NP_064613 PR domain zinc finger protein 10 isoform 1 [Homo sapiens]            |
| Arthropoda | <i>Arthropoda: Mandibulata; Pancrustacea; Hexapoda; Insecta; Dicondylia; Pterygota; Neoptera; Endopterygota; Hymenoptera; Apocrita; Chalcidoidea group; Chalcidoidea; Pteromalidae; Pteromalinae; Nasonia</i>                                                            | <i>Nasonia vitripennis (jewel wasp)</i>           | 5            | NCBI / Human Genome Sequencing Center - Baylor College of Medicine                       | <i>Nvit-PRDM1</i>                                             | XP_001607112.2   PREDICTED: hypothetical protein LOC100123469                            | SET + 4 Zn-F | 1                                                                              | NP_878911 PR domain zinc finger protein 1 isoform 2 [Homo sapiens]             |
|            |                                                                                                                                                                                                                                                                          |                                                   |              |                                                                                          | <i>Nvit-PRDM3/16a</i>                                         | XP_001606323.2   PREDICTED: hypothetical protein LOC100122721                            | 2 Zn-F       | 3/16                                                                           | NP_004982 MDS1 and EVI1 complex locus protein EVI1 isoform c [Homo sapiens]    |
|            |                                                                                                                                                                                                                                                                          |                                                   |              |                                                                                          | <i>Nvit-PRDM10/15</i>                                         | XP_003425881.1   PREDICTED: PR domain zinc finger protein 10-like                        | SET          | 10/15                                                                          | NP_064613 PR domain zinc finger protein 10 isoform 1 [Homo sapiens]            |
|            |                                                                                                                                                                                                                                                                          |                                                   |              |                                                                                          | <i>Nvit-PRDM8</i>                                             | XP_001603748.2   PREDICTED: hypothetical protein LOC100120070                            | 1 Zn-F       | 8                                                                              | NP_001092873 PR domain zinc finger protein 8 [Homo sapiens]                    |
|            |                                                                                                                                                                                                                                                                          |                                                   |              |                                                                                          | <i>Nvit-PRDM13</i>                                            | XP_001604522.2   PREDICTED: sal-like protein 3-like                                      | 1 Zn-F       | 13                                                                             | NP_067633 PR domain zinc finger protein 13 [Homo sapiens]                      |
| Arthropoda | <i>Arthropoda: Mandibulata; Pancrustacea; Hexapoda; Insecta; Dicondylia; Pterygota; Neoptera; Endopterygota; Coleoptera; Polyphaga; Cucujiformia; Tenebrionidae; Tenebrionidae; Tenebrionidae incertae sedis; Tribolium</i>                                              | <i>Tribolium castaneum (red flour beetle)</i>     | 6            | NCBI / Human Genome Sequencing Center - Baylor College of Medicine                       | <i>Tcas-PRDM1</i>                                             | XP_001815724.1   PREDICTED: similar to Blimp-1 CG5249-PA [Tribolium castaneum]           | SET + 4 Zn-F | 1                                                                              | NP_001189 PR domain zinc finger protein 1 isoform 1 [Homo sapiens]             |
|            |                                                                                                                                                                                                                                                                          |                                                   |              |                                                                                          | <i>Tcas-PRDM3/16a</i>                                         | XP_975197.2   PREDICTED: similar to conserved hypothetical protein [Tribolium castaneum] | 3 Zn-F       | 3/16                                                                           | NP_004982 MDS1 and EVI1 complex locus protein EVI1 isoform c [Homo sapiens]    |
|            |                                                                                                                                                                                                                                                                          |                                                   |              |                                                                                          | <i>Tcas-PRDM3/16b</i>                                         | XP_001815516.1   PREDICTED: similar to CG10348 CG10348-PA [Tribolium castaneum]          | 2 Zn-F       | 3/16                                                                           | NP_001157471 MDS1 and EVI1 complex locus protein EVI1 isoform d [Homo sapiens] |
|            |                                                                                                                                                                                                                                                                          |                                                   |              |                                                                                          | <i>Tcas-PRDM10/15</i>                                         | XP_974598.1   PREDICTED: similar to PR domain containing 10 [Tribolium castaneum]        | SET          | 10/15                                                                          | NP_064613 PR domain zinc finger protein 10 isoform 1 [Homo sapiens]            |
|            |                                                                                                                                                                                                                                                                          |                                                   |              |                                                                                          | <i>Tcas-PRDM8</i>                                             | XP_975271.1   PREDICTED: similar to CG13287 CG13287-PA [Tribolium castaneum]             | 2 Zn-F       | 8                                                                              | NP_001092873 PR domain zinc finger protein 8 [Homo sapiens]                    |
|            |                                                                                                                                                                                                                                                                          |                                                   |              |                                                                                          | <i>Tcas-PRDM13</i>                                            | XP_970792.1   PREDICTED: similar to CG13296 CG13296-PA [Tribolium castaneum]             | 1 Zn-F       | 13                                                                             | NP_067633 PR domain zinc finger protein 13 [Homo sapiens]                      |
| Arthropoda | <i>Arthropoda: Mandibulata; Pancrustacea; Hexapoda; Insecta; Dicondylia; Pterygota; Neoptera; Endopterygota; Amphiesmenoptera; Lepidoptera; Glossata; Neolepidoptera; Heteroneura; Ditrysia; Obtectomera; Bombycoidea; Bombycoformae; Bombycidae; Bombycinae; Bombyx</i> | <i>Bombyx mori (silkworm)</i>                     | 5            | EnsemblMetazoa / International Silkworm Genome Sequencing Consortium                     | <i>Bmor-PRDM1</i>                                             | BGIBMGA000319-PA                                                                         | SET + 3 Zn-F | 1                                                                              | NP_001189 PR domain zinc finger protein 1 isoform 1 [Homo sapiens]             |
|            |                                                                                                                                                                                                                                                                          |                                                   |              |                                                                                          | <i>Bmor-PRDM3/16a</i>                                         | BGIBMGA008996-PA                                                                         | 1 Zn-F       | 3/16                                                                           | NP_001157472 MDS1 and EVI1 complex locus protein EVI1 isoform e [Homo sapiens] |
|            |                                                                                                                                                                                                                                                                          |                                                   |              |                                                                                          | <i>Bmor-PRDM8</i>                                             | BGIBMGA012741-PA                                                                         | 1 Zn-F       | 8                                                                              | NP_001092873 PR domain zinc finger protein 8 [Homo sapiens]                    |
|            |                                                                                                                                                                                                                                                                          |                                                   |              |                                                                                          | <i>Bmor-PRDMX</i>                                             | BGIBMGA001682-PA                                                                         | 4 Zn-F       | Orphan                                                                         | NP_064612 histone-lysine N-methyltransferase PRDM9 [Homo sapiens]              |
|            |                                                                                                                                                                                                                                                                          |                                                   |              |                                                                                          | <i>Bmor-PRDM13</i>                                            | BGIBMGA010886-PA                                                                         | 1 Zn-F       | 13                                                                             | NP_067633 PR domain zinc finger protein 13 [Homo sapiens]                      |
| Arthropoda | <i>Arthropoda: Mandibulata; Pancrustacea; Hexapoda; Insecta; Dicondylia; Pterygota; Neoptera; Endopterygota;</i>                                                                                                                                                         | <i>Danaus plexippus (monarch butterfly)</i>       | 6            | EnsemblMetazoa / University of Massachusetts Medical School and Genome Project Solutions | <i>Dple-PRDM1</i>                                             | EHJ68484                                                                                 | SET + 3 Zn-F | 1                                                                              | NP_001189 PR domain zinc finger protein 1 isoform 1 [Homo sapiens]             |
|            |                                                                                                                                                                                                                                                                          |                                                   |              |                                                                                          | <i>Dple-PRDM3/16a</i>                                         | EHJ66914                                                                                 | 1 Zn-F       | 3/16                                                                           | NP_004982 MDS1 and EVI1 complex locus protein EVI1 isoform c [Homo sapiens]    |
|            |                                                                                                                                                                                                                                                                          |                                                   |              |                                                                                          | <i>Dple-PRDM3/16b</i>                                         | EHJ78527                                                                                 | 1 Zn-F       | 3/16                                                                           | NP_001157471 MDS1 and EVI1 complex locus protein EVI1 isoform d [Homo sapiens] |



**Table S3: Prdm genes in ecdysozoans.**

| Taxa                                                                                                                                                                                                                                                                                               | Species (common name)       | Source of the used sequences / Sequencing centers                  | # PRDM genes | Genes                 | Accession proteins | Domains      | PRDM family | Best Blast Hit Human                                                           |
|----------------------------------------------------------------------------------------------------------------------------------------------------------------------------------------------------------------------------------------------------------------------------------------------------|-----------------------------|--------------------------------------------------------------------|--------------|-----------------------|--------------------|--------------|-------------|--------------------------------------------------------------------------------|
| <i>Amphiesmenoptera; Lepidoptera; Glossata; Neolepidoptera; Heteroneura; Dityrta; Obectomera; Papilionoidea; Nymphalidae; Danainae; Danaini; Danaina; Danaus; Danaus</i>                                                                                                                           |                             |                                                                    |              | <i>Dple-PRDMX</i>     | EHJ78152           | 2 Zn-F       | Orphan      | NP_064612 histone-lysine N-methyltransferase PRDM9 [Homo sapiens]              |
|                                                                                                                                                                                                                                                                                                    |                             |                                                                    |              | <i>Dple-PRDM8</i>     | EHJ67802           | 1 Zn-F       | 8           | NP_001092873 PR domain zinc finger protein 8 [Homo sapiens]                    |
|                                                                                                                                                                                                                                                                                                    |                             |                                                                    |              | <i>Dple-PRDM13</i>    | EHJ69758           | 1 Zn-F       | 13          | NP_067633 PR domain zinc finger protein 13 [Homo sapiens]                      |
| <b>Arthropoda</b><br><i>Arthropoda; Mandibulata; Pancrustacea; Hexapoda; Insecta; Dicondylia; Pterygota; Neoptera; Endopterygota; Amphiesmenoptera; Lepidoptera; Glossata; Neolepidoptera; Heteroneura; Dityrta; Obectomera; Papilionoidea; Nymphalidae; Heliconiinae; Heliconiini; Heliconius</i> | <i>Heliconius melpomene</i> | NCBI / Human Genome Sequencing Center - Baylor College of Medicine | 4            | <i>Hmel-PRDM1</i>     | HMEL007072-PA      | SET + 3 Zn-F | 1           | NP_001189 PR domain zinc finger protein 1 isoform 1 [Homo sapiens]             |
|                                                                                                                                                                                                                                                                                                    |                             |                                                                    |              | <i>Hmel-PRDM3_16a</i> | HMEL003726-PA      | SET + 2 Zn-F | 3/16        | NP_004982 MDS1 and EVI1 complex locus protein EVI1 isoform c [Homo sapiens]    |
|                                                                                                                                                                                                                                                                                                    |                             |                                                                    |              | <i>Hmel-PRDM3_16b</i> | HMEL002495-PA      | 1 Zn-F       | 3/16        | NP_001157472 MDS1 and EVI1 complex locus protein EVI1 isoform e [Homo sapiens] |
|                                                                                                                                                                                                                                                                                                    |                             |                                                                    |              | <i>Hmel-PRDM8</i>     | HMEL017852-PA      | 1 Zn-F       | 8           | NP_001092873 PR domain zinc finger protein 8 [Homo sapiens]                    |

**Table S4: Prdm genes in lophotrochozoans.**

| Taxa                 | Species                                                                                | Source of the used sequences / Sequencing centers    | # PRDM genes                                                                                                               | Genes     | Accession proteins                                        | Domains                                    | PRDM family  | Best Blast Hit Human |              |                                                                            |
|----------------------|----------------------------------------------------------------------------------------|------------------------------------------------------|----------------------------------------------------------------------------------------------------------------------------|-----------|-----------------------------------------------------------|--------------------------------------------|--------------|----------------------|--------------|----------------------------------------------------------------------------|
| Mollusca             | <i>Mollusca; Bivalvia; Pteriomorpha; Ostreidae; Ostreidae; Ostreidae; Crassostrea</i>  | <i>Crassostrea gigas (oyster)</i> ( <i>pacific</i> ) | Ensembl/Metazoa /Institute of Oceanology of Chinese Academy of Sciences, Beijing Genomics Institute and Rutgers University | 13        | <i>Cgig-PRDM1</i>                                         | CGI_10024223                               | SET + 4 Zn-F | 1                    | NP_001189    | PR domain zinc finger protein 1 isoform 1 [Homo sapiens]                   |
|                      |                                                                                        |                                                      |                                                                                                                            |           | <i>Cgig-PRDM3/16a</i>                                     | CGI_10005698                               | SET + 2 Zn-F | 3/16                 | NP_004982    | MDS1 and EVI1 complex locus protein EVI1 isoform c [Homo sapiens]          |
|                      |                                                                                        |                                                      |                                                                                                                            |           | <i>Cgig-PRDM3/16b</i>                                     | CGI_10008605                               | 1 Zn-F       | 3/16                 | NP_001157472 | MDS1 and EVI1 complex locus protein EVI1 isoform e [Homo sapiens]          |
|                      |                                                                                        |                                                      |                                                                                                                            |           | <i>Cgig-PRDM4</i>                                         | CGI_10027610                               | SET + 2 Zn-F | 4                    | NP_036538    | PR domain zinc finger protein 4 [Homo sapiens]                             |
|                      |                                                                                        |                                                      |                                                                                                                            |           | <i>Cgig-PRDM10/15</i>                                     | CGI_10009638                               | SET + 1 Zn-F | 10/15                | NP_955469    | PR domain zinc finger protein 10 isoform 2 [Homo sapiens]                  |
|                      |                                                                                        |                                                      |                                                                                                                            |           | <i>Cgig-PRDM12</i>                                        | CGI_10016801                               | SET + 1 Zn-F | 12                   | NP_067632    | PR domain zinc finger protein 12 [Homo sapiens]                            |
|                      |                                                                                        |                                                      |                                                                                                                            |           | <i>Cgig-PRDM13</i>                                        | CGI_10026455                               | 1 Zn-F       | 13                   | NP_067633    | PR domain zinc finger protein 13 [Homo sapiens]                            |
|                      |                                                                                        |                                                      |                                                                                                                            |           | <i>Cgig-PRDM14b</i>                                       | CGI_10003238                               | SET + 2 Zn-F | 14                   | NP_078780    | PR domain zinc finger protein 14 [Homo sapiens]                            |
|                      |                                                                                        |                                                      |                                                                                                                            |           | <i>Cgig-PRDM14a</i>                                       | CGI_10001616                               | SET + 2 Zn-F | 14                   | NP_078780    | PR domain zinc finger protein 14 [Homo sapiens]                            |
|                      |                                                                                        |                                                      |                                                                                                                            |           | <i>Cgig-PRDM14c</i>                                       | CGI_10028491                               | SET          | 14                   | NP_064612    | histone-lysine N-methyltransferase PRDM9 [Homo sapiens]                    |
|                      |                                                                                        |                                                      |                                                                                                                            |           | <i>Cgig-PRDM14d</i>                                       | CGI_10016009                               | SET          | 14                   | NP_064612    | histone-lysine N-methyltransferase PRDM9 [Homo sapiens]                    |
|                      |                                                                                        |                                                      |                                                                                                                            |           | <i>Cgig-PRDM14e</i>                                       | CGI_10014816                               | SET          | 14                   | NP_064612    | histone-lysine N-methyltransferase PRDM9 [Homo sapiens]                    |
|                      |                                                                                        |                                                      |                                                                                                                            |           | <i>Cgig-PRDMX</i>                                         | CGI_10016008                               | SET          | Orphan               | NP_001091643 | probable histone-lysine N-methyltransferase PRDM7 isoform 1 [Homo sapiens] |
| Mollusca             | <i>Mollusca; Bivalvia; Pteriomorpha; Pteriotida; Pteriotida; Pteriotida; Pinctada</i>  | <i>Pinctada fucata (oyster)</i> ( <i>pearl</i> )     | Marine Genomics Unit Okinawa Institute of Science and technology                                                           | 8         | <i>Pfuc-PRDMX1</i>                                        | pfu_aug1.0_1171.1_65859.t1                 | 2 Zn-F       | Orphan               | NP_878911    | PR domain zinc finger protein 1 isoform 2 [Homo sapiens]                   |
|                      |                                                                                        |                                                      |                                                                                                                            |           | <i>Pfuc-PRDM3/16a</i>                                     | pfu_aug1.0_6731.1_67521.t1                 | 1 Zn-F       | 3/16                 | NP_004982    | MDS1 and EVI1 complex locus protein EVI1 isoform e [Homo sapiens]          |
|                      |                                                                                        |                                                      |                                                                                                                            |           | <i>Pfuc-PRDM3/16b</i>                                     | pfu_aug1.0_3480.1_59254.t1                 | 2 Zn-F       | 3/16                 | NP_004982    | MDS1 and EVI1 complex locus protein EVI1 isoform b [Homo sapiens]          |
|                      |                                                                                        |                                                      |                                                                                                                            |           | <i>Pfuc-PRDM7/9</i>                                       | pfu_aug1.0_4868.1_16539.t1                 | SET          | 7/9                  | NP_001091643 | probable histone-lysine N-methyltransferase PRDM7 isoform 1 [Homo sapiens] |
|                      |                                                                                        |                                                      |                                                                                                                            |           | <i>Pfuc-PRDMX2</i>                                        | pfu_aug1.0_83945.1_13302.t1                | 1 Zn-F       | Orphan               | NP_036538    | PR domain zinc finger protein 4 [Homo sapiens]                             |
|                      |                                                                                        |                                                      |                                                                                                                            |           | <i>Pfuc-PRDM8</i>                                         | pfu_aug1.0_23752.1_69582.t1                | 1 Zn-F       | 8                    | NP_001092873 | PR domain zinc finger protein 8 [Homo sapiens]                             |
|                      |                                                                                        |                                                      |                                                                                                                            |           | <i>Pfuc-PRDM10/15</i>                                     | pfu_aug1.0_17966.1_03883.t1                | 1 Zn-F       | 10/15                | NP_064613    | PR domain zinc finger protein 10 isoform 4 [Homo sapiens]                  |
|                      |                                                                                        |                                                      |                                                                                                                            |           | <i>Pfuc-PRDMX3</i>                                        | pfu_aug1.0_2572.1_23022.t1                 | SET          | Orphan               | NP_078780    | PR domain zinc finger protein 14 [Homo sapiens]                            |
| Mollusca             | <i>Mollusca; Gastropoda; Patellogastropoda; Lottioidea; Lottidae; Lottia</i>           | <i>Lottia gigantea (limpet)</i> ( <i>owl</i> )       | Doe Joint Genome Institute                                                                                                 | 12        | <i>Lgig-PRDM1</i>                                         | Lotgil 86198 gw1.69.204.1                  | 2 ZN-F       | 1                    | NP_878911    | PR domain zinc finger protein 1 isoform 2 [Homo sapiens]                   |
|                      |                                                                                        |                                                      |                                                                                                                            |           | <i>Lgig-PRDM2</i>                                         | Lotgil 153726 figenesh2_pg_C_sca_4000185   | SET          | 2                    | NP_004982    | MDS1 and EVI1 complex locus protein EVI1 isoform c [Homo sapiens]          |
|                      |                                                                                        |                                                      |                                                                                                                            |           | <i>Lgig-PRDM4</i>                                         | Lotgil 65785 gw1.31.124.1                  | SET          | 4                    | NP_036538    | PR domain zinc finger protein 4 [Homo sapiens]                             |
|                      |                                                                                        |                                                      |                                                                                                                            |           | <i>Lgig-PRDM8</i>                                         | Lotgil 69958 gw1.218.51.1                  | -            | 8                    | NP_001092873 | PR domain zinc finger protein 8 [Homo sapiens]                             |
|                      |                                                                                        |                                                      |                                                                                                                            |           | <i>Lgig-PRDM7/9</i>                                       | Lotgil 156439 figenesh2_pg_C_sca_11000125  | SET + 1 Zn-F | 7/9                  | NP_064612    | histone-lysine N-methyltransferase PRDM9 [Homo sapiens]                    |
|                      |                                                                                        |                                                      |                                                                                                                            |           | <i>Lgig-PRDMX</i>                                         | Lotgil 180523 figenesh2_pm_C_sca_181000001 | 6 Zn-F       | Orphan               | NP_064612    | histone-lysine N-methyltransferase PRDM9 [Homo sapiens]                    |
|                      |                                                                                        |                                                      |                                                                                                                            |           | <i>Lgig-PRDM10/15</i>                                     | Lotgil 104847 e_gw1.3.24.1                 | SET + 1 Zn-F | 10/15                | NP_064613    | PR domain zinc finger protein 10 isoform 1 [Homo sapiens]                  |
|                      |                                                                                        |                                                      |                                                                                                                            |           | <i>Lgig-PRDM12</i>                                        | Lotgil 130157 e_gw1.68.116.1               | SET + 2 Zn-F | 12                   | NP_067632    | PR domain zinc finger protein 12 [Homo sapiens]                            |
|                      |                                                                                        |                                                      |                                                                                                                            |           | <i>Lgig-PRDM13</i>                                        | Lotgil 130257 e_gw1.69.247.1               | -            | 13                   | NP_067633    | PR domain zinc finger protein 13 [Homo sapiens]                            |
|                      |                                                                                        |                                                      |                                                                                                                            |           | <i>Lgig-PRDM14a</i>                                       | Lotgil 114994 e_gw1.20.93.1                | SET + 2 Zn-F | 14                   | NP_078780    | PR domain zinc finger protein 14 [Homo sapiens]                            |
|                      |                                                                                        |                                                      |                                                                                                                            |           | <i>Lgig-PRDM14b</i>                                       | Lotgil 169169 figenesh2_pg_C_sca_82000111  | SET + 2 Zn-F | 14                   | NP_078780    | PR domain zinc finger protein 14 [Homo sapiens]                            |
| <i>Lgig-PRDM3/16</i> | Lotgil 88101 gw1.186.69.1                                                              | 1 Zn-F                                               | 3/16                                                                                                                       | NP_071397 | PR domain zinc finger protein 16 isoform 1 [Homo sapiens] |                                            |              |                      |              |                                                                            |
| Annelida             | <i>Annelida; Polychaeta; Palpata; Aciculata; Phyllodoceia; Nereididae; Platynereis</i> | <i>Platynereis dumerilii</i>                         | Platynereis resources - EMBL/ EMBL Heidelberg and Genoscope                                                                | 11        | <i>Pdum_prdm1a</i>                                        | LN811422                                   | 3 Zn-F       | 1                    | NP_001189    | PR domain zinc finger protein 1 isoform 1 [Homo sapiens]                   |
|                      |                                                                                        |                                                      |                                                                                                                            |           | <i>Pdum_prdm1b</i>                                        | LN811423                                   | 4 Zn-F       | 1                    | NP_001189    | PR domain zinc finger protein 1 isoform 1 [Homo sapiens]                   |
|                      |                                                                                        |                                                      |                                                                                                                            |           | <i>Pdum_prdm3/16</i>                                      | LN811424                                   | 3 Zn-F       | 3/16                 | NP_955533    | PR domain zinc finger protein 16 isoform 2 [Homo sapiens]                  |
|                      |                                                                                        |                                                      |                                                                                                                            |           | <i>Pdum_prdm4</i>                                         | LN811425                                   | SET + 5 Zn-F | 4                    | NP_036538    | PR domain zinc finger protein 4 [Homo sapiens]                             |
|                      |                                                                                        |                                                      |                                                                                                                            |           | <i>Pdum_prdm7_9a</i>                                      | LN811426                                   | SET + 6 Zn-F | 7/9                  | NP_064612    | histone-lysine N-methyltransferase PRDM9 [Homo sapiens]                    |
|                      |                                                                                        |                                                      |                                                                                                                            |           | <i>Pdum_prdm7_9b</i>                                      | LN811427                                   | 8 Zn-F       | 7/9                  | NP_064612    | histone-lysine N-methyltransferase PRDM9 [Homo sapiens]                    |
|                      |                                                                                        |                                                      |                                                                                                                            |           | <i>Pdum_prdm8</i>                                         | LN811428                                   | SET + 1 Zn-F | 8                    | NP_001092873 | PR domain zinc finger protein 8 [Homo sapiens]                             |
|                      |                                                                                        |                                                      |                                                                                                                            |           | <i>Pdum_prdm10/15</i>                                     | LN811429                                   | SET + 1 Zn-F | 10/15                | NP_064613    | PR domain zinc finger protein 10 isoform 1 [Homo sapiens]                  |
|                      |                                                                                        |                                                      |                                                                                                                            |           | <i>Pdum-prdm12</i>                                        | LN811430                                   | SET + 2 Zn-F | 12                   | NP_067632    | PR domain zinc finger protein 12 [Homo sapiens]                            |
|                      |                                                                                        |                                                      |                                                                                                                            |           | <i>Pdum-prdm13</i>                                        | LN811431                                   | 1 Zn-F       | 13                   | NP_067633    | PR domain zinc finger protein 13 [Homo sapiens]                            |
|                      |                                                                                        |                                                      |                                                                                                                            |           | <i>Pdum-prdm14</i>                                        | LN811432                                   | SET + 3 Zn-F | 14                   | NP_078780    | PR domain zinc finger protein 14 [Homo sapiens]                            |
| Annelida             | <i>Annelida; Polychaeta; Scolecida; Capitellida; Capitellidae; Capitella</i>           | <i>Capitella teleta</i>                              | Doe Joint Genome Institute                                                                                                 | 11        | <i>Ctel-PRDM14a</i>                                       | Cc103287_e_gw1_24_122_1                    | SET + 2 Zn-F | 14                   | NP_078780    | PR domain zinc finger protein 14 [Homo sapiens]                            |
|                      |                                                                                        |                                                      |                                                                                                                            |           | <i>Ctel-PRDM13</i>                                        | Cc164570_estExt_Genewise1_C_430040         | SET + 2 Zn-F | 13                   | NP_067633    | PR domain zinc finger protein 13 [Homo sapiens]                            |
|                      |                                                                                        |                                                      |                                                                                                                            |           | <i>Ctel-PRDM4</i>                                         | Cc168004_estExt_Genewise1Plus_C_2950035    | 2 Zn-F       | 4                    | NP_036538    | PR domain zinc finger protein 4 [Homo sapiens]                             |
|                      |                                                                                        |                                                      |                                                                                                                            |           | <i>Ctel-PRDM2a</i>                                        | Cc187754_figenesh1_pg_C_scaffold_236000023 | SET          | 2                    | NP_001091643 | probable histone-lysine N-methyltransferase PRDM7 isoform 1 [Homo sapiens] |
|                      |                                                                                        |                                                      |                                                                                                                            |           | <i>Ctel-PRDM2b</i>                                        | Cc202965_figenesh1_pg_C_scaffold_56000002  | SET + 1 Zn-F | 2                    | NP_064612    | histone-lysine N-methyltransferase PRDM9 [Homo sapiens]                    |

**Table S4: Prdm genes in lophotrochozoans.**

| Taxa                   | Species                                                                                                        | Source of the used sequences / Sequencing centers | # PRDM genes                                                                                 | Genes                 | Accession proteins                    | Domains           | PRDM family  | Best Blast Hit Human                                                        |                                                                                |
|------------------------|----------------------------------------------------------------------------------------------------------------|---------------------------------------------------|----------------------------------------------------------------------------------------------|-----------------------|---------------------------------------|-------------------|--------------|-----------------------------------------------------------------------------|--------------------------------------------------------------------------------|
|                        |                                                                                                                |                                                   |                                                                                              | <i>Ctel-PRDM10/15</i> | Cc221119_estExt_fgensch1_pg_C_3990009 | SET               | 10/15        | NP_955471 PR domain zinc finger protein 10 isoform 4 [Homo sapiens]         |                                                                                |
|                        |                                                                                                                |                                                   |                                                                                              | <i>Ctel-PRDM8</i>     | Cc221467_estExt_fgensch1_pg_C_4900001 | 1 Zn-F            | 8            | NP_001092873 PR domain zinc finger protein 8 [Homo sapiens]                 |                                                                                |
|                        |                                                                                                                |                                                   |                                                                                              | <i>Ctel-PRDM3/16</i>  | Cc223464_estExt_fgensch1_pg_C_1690005 | 2 ZN-F            | 3/16         | NP_004982 MDS1 and EVI1 complex locus protein EVI1 isoform c [Homo sapiens] |                                                                                |
|                        |                                                                                                                |                                                   |                                                                                              | <i>Ctel-PRDM1</i>     | Cc226252_estExt_fgensch1_pg_C_550010  | SET + 4 Zn-F      | 1            | NP_001189 PR domain zinc finger protein 1 isoform 1 [Homo sapiens]          |                                                                                |
|                        |                                                                                                                |                                                   |                                                                                              | <i>Ctel-PRDM14b</i>   | Cc228499_estExt_fgensch1_pg_C_6640010 | SET + 2 Zn-F      | 14           | NP_078780 PR domain zinc finger protein 14 [Homo sapiens]                   |                                                                                |
|                        |                                                                                                                |                                                   |                                                                                              | <i>Ctel-PRDMX</i>     | Cc75757_gw1_2103_2_1                  | SET + 3 Zn-F      | Orphan       | NP_078780 PR domain zinc finger protein 14 [Homo sapiens]                   |                                                                                |
| <b>Annelida</b>        | <i>Annelida; Clitellata; Hirudinida; Hirudinea; Rhynchobdellida; Glossiphoniidae; Helobdella</i>               | <i>Helobdella robusta</i> (freshwater leech)      | Doe Joint Genome Institute                                                                   | 8                     | <i>Hrob-PRDM14</i>                    | Helro 104861      | SET + 2 Zn-F | 14                                                                          | NP_078780 PR domain zinc finger protein 14 [Homo sapiens]                      |
|                        |                                                                                                                |                                                   |                                                                                              |                       | <i>Hrob-PRDM3/16a</i>                 | Helro 108457      | 1 Zn-F       | 3/16                                                                        | NP_004982 MDS1 and EVI1 complex locus protein EVI1 isoform c [Homo sapiens]    |
|                        |                                                                                                                |                                                   |                                                                                              |                       | <i>Hrob-PRDM3/16b</i>                 | Helro 63800       | 1 Zn-F       | 3/16                                                                        | NP_001157472 MDS1 and EVI1 complex locus protein EVI1 isoform c [Homo sapiens] |
|                        |                                                                                                                |                                                   |                                                                                              |                       | <i>Hrob-PRDM13</i>                    | Helro 144862      | 1 Zn-F       | 13                                                                          | NP_067633 PR domain zinc finger protein 13 [Homo sapiens]                      |
|                        |                                                                                                                |                                                   |                                                                                              |                       | <i>Hrob-PRDMX</i>                     | Helro 87582       | 1 Zn-F       | Orphan                                                                      | NP_067633 PR domain zinc finger protein 13 [Homo sapiens]                      |
|                        |                                                                                                                |                                                   |                                                                                              |                       | <i>Hrob-PRDM1a</i>                    | Helro 105412      | SET + 1 Zn-F | 1                                                                           | NP_001189 PR domain zinc finger protein 1 isoform 1 [Homo sapiens]             |
|                        |                                                                                                                |                                                   |                                                                                              |                       | <i>Hrob-PRDM1b</i>                    | Helro 184834      | SET + 2 Zn-F | 1                                                                           | NP_001189 PR domain zinc finger protein 1 isoform 1 [Homo sapiens]             |
|                        |                                                                                                                |                                                   |                                                                                              |                       | <i>Hrob-PRDM10/15</i>                 | Helro 168778      | SET          | 10/15                                                                       | NP_064613 PR domain zinc finger protein 10 isoform 1 [Homo sapiens]            |
| <b>Platyhelminthes</b> | <i>Platyhelminthes; Rhabditophora; Seriata; Tricladida; Continenticola; Geoplanoidea; Dugesidae; Schmidtea</i> | <i>Schmidtea mediterranea</i>                     | <i>Schmidtea mediterranea</i> Genome Database/ The Genome Institute at Washington University | 8                     | <i>Smed-PRDMX1</i>                    | mk4.000643.13.01  | 3 Zn-F       | Orphan                                                                      | NP_878911 PR domain zinc finger protein 1 isoform 2 [Homo sapiens]             |
|                        |                                                                                                                |                                                   |                                                                                              |                       | <i>Smed-PRDM1</i>                     | mk4.000179.12.01  | 3 Zn-F       | 1                                                                           | NP_878911 PR domain zinc finger protein 1 isoform 2 [Homo sapiens]             |
|                        |                                                                                                                |                                                   |                                                                                              |                       | <i>Smed-PRDM3/16a</i>                 | mk4.001177.00.01  | 1 Zn-F       | 3/16                                                                        | XP_002346939 PREDICTED: PR domain zinc finger protein 16-like [Homo sapiens]   |
|                        |                                                                                                                |                                                   |                                                                                              |                       | <i>Smed-PRDMX2</i>                    | mk4.043837.00.01  | -            | Orphan                                                                      | NP_001098548 MDS1 and EVI1 complex locus protein EVI1 isoform b [Homo sapiens] |
|                        |                                                                                                                |                                                   |                                                                                              |                       | <i>Smed-PRDM3/16b</i>                 | mk4.000115.12.01  | 1 Zn-F       | 3/16                                                                        | NP_004982 MDS1 and EVI1 complex locus protein EVI1 isoform c [Homo sapiens]    |
|                        |                                                                                                                |                                                   |                                                                                              |                       | <i>Smed-PRDM8</i>                     | mk4.005436.03.01  | SET          | 8                                                                           | NP_001092873 PR domain zinc finger protein 8 [Homo sapiens]                    |
|                        |                                                                                                                |                                                   |                                                                                              |                       | <i>Smed-PRDM13</i>                    | mk4.000084.16.01  | -            | 13                                                                          | NP_067633 PR domain zinc finger protein 13 [Homo sapiens]                      |
|                        |                                                                                                                |                                                   |                                                                                              |                       | <i>Smed-PRDM14</i>                    | mk4.026337.00.01  | 1 Zn-F       | 14                                                                          | NP_078780 PR domain zinc finger protein 14 [Homo sapiens]                      |
| <b>Platyhelminthes</b> | <i>Platyhelminthes; Trematoda; Digenea; Strigeiida; Schistosomatidae; Schistosomatidae; Schistosoma</i>        | <i>Schistosoma mansoni</i> (blood-flukes)         | EnsemblMetazoa / The Wellcome Trust Sanger Institute and The Institute for Genomic Research  | 6                     | <i>Sman-PRDM8</i>                     | Smp_016750.1      | -            | 8                                                                           | NP_001092873 PR domain zinc finger protein 8 [Homo sapiens]                    |
|                        |                                                                                                                |                                                   |                                                                                              |                       | <i>Sman-PRDM1</i>                     | Smp_128350.1      | 3 Zn-F       | 1                                                                           | NP_001189 PR domain zinc finger protein 1 isoform 1 [Homo sapiens]             |
|                        |                                                                                                                |                                                   |                                                                                              |                       | <i>Sman-PRDMX2</i>                    | Smp_131300.1      | SET          | Orphan                                                                      | NP_067633 PR domain zinc finger protein 13 [Homo sapiens]                      |
|                        |                                                                                                                |                                                   |                                                                                              |                       | <i>Sman-PRDMX3</i>                    | Smp_138420.2.1    | -            | Orphan                                                                      | NP_078780 PR domain zinc finger protein 14 [Homo sapiens]                      |
|                        |                                                                                                                |                                                   |                                                                                              |                       | <i>Sman-PRDM3/16</i>                  | Smp_140980.1      | 2 ZN-F       | 3/16                                                                        | NP_004982 MDS1 and EVI1 complex locus protein EVI1 isoform c [Homo sapiens]    |
|                        |                                                                                                                |                                                   |                                                                                              |                       | <i>Sman-PRDMX1</i>                    | Smp_156420.1      | 1 Zn-F       | Orphan                                                                      | NP_001157471 MDS1 and EVI1 complex locus protein EVI1 isoform d [Homo sapiens] |
| <b>Rotifera</b>        | <i>Rotifera; Bdelloidea; Adinetida; Adinetidae; Adineta</i>                                                    | <i>Adineta vaga</i>                               | Genoscope                                                                                    | 9                     | <i>Avag_Prmd1a</i>                    | GSADVT0003290001  | 2 Zn-F       | 1                                                                           | NP_001189 PR domain zinc finger protein 1 isoform 1 [Homo sapiens]             |
|                        |                                                                                                                |                                                   |                                                                                              |                       | <i>Avag_Prmd1b</i>                    | GSADVT00048603001 | 2 Zn-F       | 1                                                                           | NP_001189 PR domain zinc finger protein 1 isoform 1 [Homo sapiens]             |
|                        |                                                                                                                |                                                   |                                                                                              |                       | <i>Avag_Prmd3/16a</i>                 | GSADVT00017901001 | 2 Zn-F       | 3/16                                                                        | NP_001157471 MDS1 and EVI1 complex locus protein EVI1 isoform d [Homo sapiens] |
|                        |                                                                                                                |                                                   |                                                                                              |                       | <i>Avag_Prmd3/16b</i>                 | GSADVT00051695001 | 3 Zn-F       | 3/16                                                                        | NP_004982 MDS1 and EVI1 complex locus protein EVI1 isoform c [Homo sapiens]    |
|                        |                                                                                                                |                                                   |                                                                                              |                       | <i>Avag_Prmd3/16c</i>                 | GSADVT00035848001 | -            | 3/16                                                                        | NP_071397 PR domain zinc finger protein 16 isoform 1 [Homo sapiens]            |
|                        |                                                                                                                |                                                   |                                                                                              |                       | <i>Avag_PrmdX1</i>                    | GSADVT00046916001 | -            | Orphan                                                                      | NP_071397 PR domain zinc finger protein 16 isoform 1 [Homo sapiens]            |
|                        |                                                                                                                |                                                   |                                                                                              |                       | <i>Avag_PrmdX2</i>                    | GSADVT00034811001 | -            | Orphan                                                                      | NP_001035514 PR domain zinc finger protein 15 isoform 2 [Homo sapiens]         |
|                        |                                                                                                                |                                                   |                                                                                              |                       | <i>Avag_Prmd8</i>                     | GSADVT00005829001 | -            | 8                                                                           | NP_001092873 PR domain zinc finger protein 8 [Homo sapiens]                    |
|                        |                                                                                                                |                                                   |                                                                                              |                       | <i>Avag_Prmd13</i>                    | GSADVT00030555001 | 1 Zn-F       | 13                                                                          | NP_067633 PR domain zinc finger protein 13 [Homo sapiens]                      |

**Table S5: Prdm genes in non-vertebrate deuterostomes.**

| Taxa                 | Species (common name)                                                              | Source of the used sequences / Sequencing centers | # PRDM genes                      | Genes                                                             | Accession proteins    | Domains                                                                                                                                 | PRDM family                                              | Best Blast Hit Human                                               |                                                                                |                      |                                                                           |              |      |                                                                             |
|----------------------|------------------------------------------------------------------------------------|---------------------------------------------------|-----------------------------------|-------------------------------------------------------------------|-----------------------|-----------------------------------------------------------------------------------------------------------------------------------------|----------------------------------------------------------|--------------------------------------------------------------------|--------------------------------------------------------------------------------|----------------------|---------------------------------------------------------------------------|--------------|------|-----------------------------------------------------------------------------|
| Urochordata          | <i>Chordata; Tunicata; Ascidiacea; Enterogona; Phlebobranchia; Cionidae; Ciona</i> | <i>Ciona intestinalis (sea squirt)</i>            | NCBI / Doe Joint Genome Institute | 7                                                                 | <i>Cint-PRDM1a</i>    | NP_001122361.1  zinc finger protein (C2H2)-46                                                                                           | 2 Zn-F                                                   | 1                                                                  | NP_001189 PR domain zinc finger protein 1 isoform 1 [Homo sapiens]             |                      |                                                                           |              |      |                                                                             |
|                      |                                                                                    |                                                   |                                   |                                                                   | <i>Cint-PRDM1b</i>    | XP_002122594.1  PREDICTED: uncharacterized protein LOC100178922                                                                         | 2 Zn-F                                                   | 1                                                                  | NP_001189 PR domain zinc finger protein 1 isoform 1 [Homo sapiens]             |                      |                                                                           |              |      |                                                                             |
|                      |                                                                                    |                                                   |                                   |                                                                   | <i>Cint-PRDM1c</i>    | XP_002124563.1  PREDICTED: zinc finger and BTB domain-containing protein 48-like                                                        | 2 Zn-F                                                   | 1                                                                  | NP_001189 PR domain zinc finger protein 1 isoform 1 [Homo sapiens]             |                      |                                                                           |              |      |                                                                             |
|                      |                                                                                    |                                                   |                                   |                                                                   | <i>Cint-PRDM7/9</i>   | XP_002130308.1  PREDICTED: histone-lysine N-methyltransferase PRDM9-like                                                                | SET + 3 Zn-F                                             | 7/9                                                                | NP_064612 histone-lysine N-methyltransferase PRDM9 [Homo sapiens]              |                      |                                                                           |              |      |                                                                             |
|                      |                                                                                    |                                                   |                                   |                                                                   | <i>Cint-PRDM3/16a</i> | NP_001037821.1  zinc finger protein LOC723797                                                                                           | 2 Zn-F                                                   | 3/16                                                               | NP_004982 MDS1 and EVI1 complex locus protein EVI1 isoform c [Homo sapiens]    |                      |                                                                           |              |      |                                                                             |
|                      |                                                                                    |                                                   |                                   |                                                                   | <i>Cint-PRDM3/16b</i> | NP_001071904.1  zinc finger protein                                                                                                     | 2 Zn-F                                                   | 3/16                                                               | NP_001098548 MDS1 and EVI1 complex locus protein EVI1 isoform b [Homo sapiens] |                      |                                                                           |              |      |                                                                             |
|                      |                                                                                    |                                                   |                                   |                                                                   | <i>Cint-PRDM10/15</i> | XP_002128357.1  PREDICTED: PR domain zinc finger protein 10                                                                             | SET                                                      | 10/15                                                              | NP_064613 PR domain zinc finger protein 10 isoform 1 [Homo sapiens]            |                      |                                                                           |              |      |                                                                             |
| Urochordata          | <i>Chordata; Tunicata; Ascidiacea; Enterogona; Phlebobranchia; Cionidae; Ciona</i> | <i>Ciona savignyi</i>                             | Ensembl / Broad Institute         | 5                                                                 | <i>Csav-PRDM1</i>     | ENSCSAVP00000018974                                                                                                                     | 2 Zn-F                                                   | 1                                                                  | NP_001189 PR domain zinc finger protein 1 isoform 1 [Homo sapiens]             |                      |                                                                           |              |      |                                                                             |
|                      |                                                                                    |                                                   |                                   |                                                                   | <i>Csav-PRDMX1</i>    | ENSCSAVP00000016503                                                                                                                     | -                                                        | Orphan                                                             | NP_064612 histone-lysine N-methyltransferase PRDM9 [Homo sapiens]              |                      |                                                                           |              |      |                                                                             |
|                      |                                                                                    |                                                   |                                   |                                                                   | <i>Csav-PRDM10/15</i> | ENSCSAVP00000014934                                                                                                                     | SET                                                      | 10/15                                                              | NP_064613 PR domain zinc finger protein 10 isoform 1 [Homo sapiens]            |                      |                                                                           |              |      |                                                                             |
|                      |                                                                                    |                                                   |                                   |                                                                   | <i>Csav-PRDM3/16</i>  | ENSCSAVP00000007598                                                                                                                     | 1 Zn-F                                                   | 3/16                                                               | NP_004982 MDS1 and EVI1 complex locus protein EVI1 isoform c [Homo sapiens]    |                      |                                                                           |              |      |                                                                             |
|                      |                                                                                    |                                                   |                                   |                                                                   | <i>Csav-PRDMX2</i>    | ENSCSAVP00000007596                                                                                                                     | 1 Zn-F                                                   | Orphan                                                             | NP_001157472 MDS1 and EVI1 complex locus protein EVI1 isoform e [Homo sapiens] |                      |                                                                           |              |      |                                                                             |
| Cephalochordata      | <i>Chordata; Cephalochordata; Branchiostomidae; Branchiostoma</i>                  | <i>Branchiostoma floridae (Amphioxus)</i>         | Doe Joint Genome Institute        | 11                                                                | <i>Bflo-PRDM1</i>     | jgi Brafl1 120369 estExt_fgensch2_pg_C_440063                                                                                           | SET + 3 Zn-F                                             | 1                                                                  | NP_001189 PR domain zinc finger protein 1 isoform 1 [Homo sapiens]             |                      |                                                                           |              |      |                                                                             |
|                      |                                                                                    |                                                   |                                   |                                                                   | <i>Bflo-PRDM2</i>     | jgi Brafl1 126284 estExt_fgensch2_pg_C_2100033                                                                                          | SET + 2 Zn-F                                             | 2                                                                  | NP_036363 PR domain zinc finger protein 2 isoform a [Homo sapiens]             |                      |                                                                           |              |      |                                                                             |
|                      |                                                                                    |                                                   |                                   |                                                                   | <i>Bflo-PRDM3/16</i>  | jgi Brafl1 126318 estExt_fgensch2_pg_C_2110039                                                                                          | SET + 5 Zn-F                                             | 3/16                                                               | NP_004982 MDS1 and EVI1 complex locus protein EVI1 isoform c [Homo sapiens]    |                      |                                                                           |              |      |                                                                             |
|                      |                                                                                    |                                                   |                                   |                                                                   | <i>Bflo-PRDM4</i>     | jgi Brafl1 199581 e_gw.3.285.1                                                                                                          | SET + 1 Zn-F                                             | 4                                                                  | NP_036538 PR domain zinc finger protein 4 [Homo sapiens]                       |                      |                                                                           |              |      |                                                                             |
|                      |                                                                                    |                                                   |                                   |                                                                   | <i>Bflo-PRDM6</i>     | jgi Brafl1 90731 fgensch2_pg_scaffold_201000036                                                                                         | SET + 2 Zn-F                                             | 6                                                                  | NP_001129711 putative histone-lysine N-methyltransferase PRDM6 [Homo sapiens]  |                      |                                                                           |              |      |                                                                             |
|                      |                                                                                    |                                                   |                                   |                                                                   | <i>Bflo-PRDMX</i>     | jgi Brafl1 96304 fgensch2_pg_scaffold_282000018                                                                                         | SET + 1 Zn-F                                             | Orphan                                                             | NP_001092873 PR domain zinc finger protein 8 [Homo sapiens]                    |                      |                                                                           |              |      |                                                                             |
|                      |                                                                                    |                                                   |                                   |                                                                   | <i>Bflo-PRDM7/9</i>   | jgi Brafl1 119068 estExt_fgensch2_pg_C_230072                                                                                           | SET + 3 Zn-F                                             | 7/9                                                                | NP_064612 histone-lysine N-methyltransferase PRDM9 [Homo sapiens]              |                      |                                                                           |              |      |                                                                             |
|                      |                                                                                    |                                                   |                                   |                                                                   | <i>Bflo-PRDM10/15</i> | jgi Brafl1 125674 estExt_fgensch2_pg_C_1910081                                                                                          | SET + 2 Zn-F                                             | 10/15                                                              | NP_955471 PR domain zinc finger protein 10 isoform 4 [Homo sapiens]            |                      |                                                                           |              |      |                                                                             |
|                      |                                                                                    |                                                   |                                   |                                                                   | <i>Bflo-PRDM12</i>    | jgi Brafl1 105710 fgensch2_pg_scaffold_504000008                                                                                        | SET + 2 Zn-F                                             | 12                                                                 | NP_067632 PR domain zinc finger protein 12 [Homo sapiens]                      |                      |                                                                           |              |      |                                                                             |
|                      |                                                                                    |                                                   |                                   |                                                                   | <i>Bflo-PRDM13</i>    | jgi Brafl1 160222 gw.506.20.1                                                                                                           | 1 Zn-F                                                   | 13                                                                 | NP_067633 PR domain zinc finger protein 13 [Homo sapiens]                      |                      |                                                                           |              |      |                                                                             |
|                      |                                                                                    |                                                   |                                   |                                                                   | <i>Bflo-PRDM14</i>    | jgi Brafl1 240852 e_gw.386.8.1                                                                                                          | SET + 3 Zn-F                                             | 14                                                                 | NP_078780 PR domain zinc finger protein 14 [Homo sapiens]                      |                      |                                                                           |              |      |                                                                             |
|                      |                                                                                    |                                                   |                                   |                                                                   | Echinodermata         | <i>Echinodermata; Eleutherozoa; Echinozoa; Echinoidea; Euechinoidea; Echinacea; Echinoida; Strongylocentrotidae; Strongylocentrotus</i> | <i>Strongylocentrotus purpuratus (purple sea urchin)</i> | NCBI / Human Genome Sequencing Center - Baylor College of Medicine | 17                                                                             | <i>Spur-PRDM1</i>    | NP_001073021.1  Blimp1/Krox1b                                             | SET + 3 Zn-F | 1    | NP_001189 PR domain zinc finger protein 1 isoform 1 [Homo sapiens]          |
|                      |                                                                                    |                                                   |                                   |                                                                   |                       |                                                                                                                                         |                                                          |                                                                    |                                                                                | <i>Spur-PRDM2</i>    | XP_003724631.1  PREDICTED: uncharacterized protein LOC100893443 isoform 2 | SET          | 2    | NP_056950 PR domain zinc finger protein 2 isoform b [Homo sapiens]          |
|                      |                                                                                    |                                                   |                                   |                                                                   |                       |                                                                                                                                         |                                                          |                                                                    |                                                                                | <i>Spur-PRDM3/16</i> | XP_003730421.1  PREDICTED: PR domain zinc finger protein 16-like          | 3 Zn-F       | 3/16 | NP_004982 MDS1 and EVI1 complex locus protein EVI1 isoform c [Homo sapiens] |
| <i>Spur-PRDM4</i>    | XP_003723338.1  PREDICTED: uncharacterized protein LOC100891124                    | SET + 3 Zn-F                                      | 4                                 | NP_036538 PR domain zinc finger protein 4 [Homo sapiens]          |                       |                                                                                                                                         |                                                          |                                                                    |                                                                                |                      |                                                                           |              |      |                                                                             |
| <i>Spur-PRDM7/9a</i> | XP_792842.3  PREDICTED: zinc finger protein 850-like, partial                      | SET + 7 Zn-F                                      | 7/9                               | NP_064612 histone-lysine N-methyltransferase PRDM9 [Homo sapiens] |                       |                                                                                                                                         |                                                          |                                                                    |                                                                                |                      |                                                                           |              |      |                                                                             |
| <i>Spur-PRDM7/9b</i> | XP_794235.3  PREDICTED: histone-lysine N-methyltransferase PRDM9-like              | SET + 10 Zn-F                                     | 7/9                               | NP_064612 histone-lysine N-methyltransferase PRDM9 [Homo sapiens] |                       |                                                                                                                                         |                                                          |                                                                    |                                                                                |                      |                                                                           |              |      |                                                                             |
| <i>Spur-PRDM7/9c</i> | XP_003724787.1  PREDICTED: histone-lysine N-methyltransferase PRDM9-like           | SET                                               | 7/9                               | NP_064612 histone-lysine N-methyltransferase PRDM9 [Homo sapiens] |                       |                                                                                                                                         |                                                          |                                                                    |                                                                                |                      |                                                                           |              |      |                                                                             |
| <i>Spur-PRDM7/9d</i> | XP_003728319.1  PREDICTED: histone-lysine N-methyltransferase PRDM9-like           | SET + 2 Zn-F                                      | 7/9                               | NP_064612 histone-lysine N-methyltransferase PRDM9 [Homo sapiens] |                       |                                                                                                                                         |                                                          |                                                                    |                                                                                |                      |                                                                           |              |      |                                                                             |
| <i>Spur-PRDM7/9e</i> | XP_788042.2  PREDICTED: histone-lysine N-methyltransferase PRDM9-like              | SET                                               | 7/9                               | NP_064612 histone-lysine N-methyltransferase PRDM9 [Homo sapiens] |                       |                                                                                                                                         |                                                          |                                                                    |                                                                                |                      |                                                                           |              |      |                                                                             |
| <i>Spur-PRDM7/9f</i> | XP_003727211.1  PREDICTED: zinc finger protein 91-like                             | SET                                               | 7/9                               | NP_064612 histone-lysine N-methyltransferase PRDM9 [Homo sapiens] |                       |                                                                                                                                         |                                                          |                                                                    |                                                                                |                      |                                                                           |              |      |                                                                             |
| <i>Spur-PRDM7/9g</i> | XP_791556.1  PREDICTED: zinc finger protein 227-like                               | SET                                               | 7/9                               | NP_064612 histone-lysine N-methyltransferase PRDM9 [Homo sapiens] |                       |                                                                                                                                         |                                                          |                                                                    |                                                                                |                      |                                                                           |              |      |                                                                             |
| <i>Spur-PRDM7/9h</i> | XP_787589.2  PREDICTED: uncharacterized protein LOC582550                          | SET                                               | 7/9                               | NP_064612 histone-lysine N-methyltransferase PRDM9 [Homo sapiens] |                       |                                                                                                                                         |                                                          |                                                                    |                                                                                |                      |                                                                           |              |      |                                                                             |

**Table S5: *Prdm* genes in non-vertebrate deuterostomes.**

| Taxa                | Species (common name)                                           | Source of the used sequences / Sequencing centers | # PRDM genes                                                       | Genes                 | Accession proteins                                               | Domains                                                                            | PRDM family  | Best Blast Hit Human                                                   |                                                                               |
|---------------------|-----------------------------------------------------------------|---------------------------------------------------|--------------------------------------------------------------------|-----------------------|------------------------------------------------------------------|------------------------------------------------------------------------------------|--------------|------------------------------------------------------------------------|-------------------------------------------------------------------------------|
|                     |                                                                 |                                                   |                                                                    | <i>Spur-PRDM7/9i</i>  | XP_003727216.1  PREDICTED: PR domain zinc finger protein 10-like | SET                                                                                | 7/9          | NP_078780 PR domain zinc finger protein 14 [Homo sapiens]              |                                                                               |
|                     |                                                                 |                                                   |                                                                    | <i>Spur-PRDM7/9j</i>  | XP_003726187.1  PREDICTED: uncharacterized protein LOC100888640  | SET + 1 Zn-F                                                                       | 7/9          | NP_001035514 PR domain zinc finger protein 15 isoform 2 [Homo sapiens] |                                                                               |
|                     |                                                                 |                                                   |                                                                    | <i>Spur-PRDM10_15</i> | XP_796389.3  PREDICTED: uncharacterized protein LOC591744        | SET + 2 Zn-F                                                                       | 10/15        | NP_064613 PR domain zinc finger protein 10 isoform 1 [Homo sapiens]    |                                                                               |
|                     |                                                                 |                                                   |                                                                    | <i>Spur-PRDM12</i>    | XP_790201.2  PREDICTED: PR domain zinc finger protein 12-like    | SET + 2 Zn-F                                                                       | 12           | NP_067632 PR domain zinc finger protein 12 [Homo sapiens]              |                                                                               |
|                     |                                                                 |                                                   |                                                                    | <i>Spur-PRDM13</i>    | XP_003728148.1  PREDICTED: zinc finger protein 26-like           | 1 Zn-F                                                                             | 13           | NP_067633 PR domain zinc finger protein 13 [Homo sapiens]              |                                                                               |
|                     |                                                                 |                                                   |                                                                    | <i>Spur-PRDM14</i>    | XP_794184.3  PREDICTED: PR domain zinc finger protein 14-like    | SET + 2 Zn-F                                                                       | 14           | NP_078780 PR domain zinc finger protein 14 [Homo sapiens]              |                                                                               |
| <b>Hemichordata</b> | <i>Hemichordata: Enteropneusta: Harrimaniidae: Saccoglossus</i> | <i>Saccoglossus kowalevskii (acorn worm)</i>      | NCBI / Human Genome Sequencing Center - Baylor College of Medicine | 10                    | <i>Skow-PRDM2a</i>                                               | XP_002741726.1  PREDICTED: retinoblastoma protein-binding zinc finger protein-like | SET + 1 Zn-F | 2                                                                      | NP_056950 PR domain zinc finger protein 2 isoform b [Homo sapiens]            |
|                     |                                                                 |                                                   |                                                                    |                       | <i>Skow-PRDM2b</i>                                               | XP_002732088.1  PREDICTED: retinoblastoma protein-binding zinc finger protein-like | SET + 1 Zn-F | 2                                                                      | NP_001007258 PR domain zinc finger protein 2 isoform c [Homo sapiens]         |
|                     |                                                                 |                                                   |                                                                    |                       | <i>Skow-PRDM2c</i>                                               | XP_002736208.1  PREDICTED: retinoblastoma protein-binding zinc finger protein-like | SET + 1 Zn-F | 2                                                                      | NP_056950 PR domain zinc finger protein 2 isoform b [Homo sapiens]            |
|                     |                                                                 |                                                   |                                                                    |                       | <i>Skow-PRDM6</i>                                                | NP_001161634.1  PR domain containing 6-like protein                                | SET + 2 Zn-F | 6                                                                      | NP_001129711 putative histone-lysine N-methyltransferase PRDM6 [Homo sapiens] |
|                     |                                                                 |                                                   |                                                                    |                       | <i>Skow-PRDM10/15</i>                                            | XP_002731410.1  PREDICTED: PR domain containing 4-like                             | SET + 3 Zn-F | 10/15                                                                  | NP_064613 PR domain zinc finger protein 10 isoform 1 [Homo sapiens]           |
|                     |                                                                 |                                                   |                                                                    |                       | <i>Skow-PRDM13</i>                                               | XP_002740058.1  PREDICTED: zinc finger and BTB domain containing 48-like           | SET          | 13                                                                     | NP_067633 PR domain zinc finger protein 13 [Homo sapiens]                     |
|                     |                                                                 |                                                   |                                                                    |                       | <i>Skow-PRDM14a</i>                                              | XP_002739286.1  PREDICTED: PR domain containing 14-like                            | SET + 2 Zn-F | 14                                                                     | NP_078780 PR domain zinc finger protein 14 [Homo sapiens]                     |
|                     |                                                                 |                                                   |                                                                    |                       | <i>Skow-PRDM14b</i>                                              | XP_002737396.1  PREDICTED: PR domain containing 14-like                            | SET + 2 Zn-F | 14                                                                     | NP_078780 PR domain zinc finger protein 14 [Homo sapiens]                     |
|                     |                                                                 |                                                   |                                                                    |                       | <i>Skow-PRDMX2</i>                                               | XP_002736218.1  PREDICTED: predicted protein-like                                  | 6 Zn-F       | Orphan                                                                 | NP_064612 histone-lysine N-methyltransferase PRDM9 [Homo sapiens]             |
|                     |                                                                 |                                                   |                                                                    |                       | <i>Skow-PRDMX1</i>                                               | XP_002741229.1  PREDICTED: zinc finger-like protein-like                           | SET          | Orphan                                                                 | NP_036538 PR domain zinc finger protein 4 [Homo sapiens]                      |

**Table S6: Prdm genes in vertebrates.**

| Taxa                                                                                                                                                                                                                                                                          | Species                | Source of the used sequences / Sequencing centers | # PRDM genes                                                               | Genes | Accession proteins | Domains                                                           | PRDM family   | Best Blast Hit Human |                                                                                         |
|-------------------------------------------------------------------------------------------------------------------------------------------------------------------------------------------------------------------------------------------------------------------------------|------------------------|---------------------------------------------------|----------------------------------------------------------------------------|-------|--------------------|-------------------------------------------------------------------|---------------|----------------------|-----------------------------------------------------------------------------------------|
| Mammalia<br><i>Craniata; Vertebrata; Gnathostomata; Teleostomi; Euteleostomi; Sarcopterygii; Dipnotetrapodomorpha; Tetrapoda; Amniota; Mammalia; Theria; Eutheria; Euarchontoglires; Primates; Haplorrhini; Simiiformes; Catarrhini; Hominoidea; Hominidae; Hominae; Homo</i> | <i>Homo sapiens</i>    | Human                                             | NCBI / Genome Reference Consortium and J. Craig Venter Institute           | 17    | <i>Hsap-PRDM1</i>  | NP_001189.2  PR domain zinc finger protein 1                      | SET + 4 Zn-F  | 1                    | n/a                                                                                     |
|                                                                                                                                                                                                                                                                               |                        |                                                   |                                                                            |       | <i>Hsap-PRDM2</i>  | NP_056950.2  PR domain zinc finger protein 2                      | SET + 1 Zn-F  | 2                    | n/a                                                                                     |
|                                                                                                                                                                                                                                                                               |                        |                                                   |                                                                            |       | <i>Hsap-PRDM3</i>  | NP_005232.2  MDS1 and EVI1 complex locus protein EVI1             | SET + 2 Zn-F  | 3/16                 | n/a                                                                                     |
|                                                                                                                                                                                                                                                                               |                        |                                                   |                                                                            |       | <i>Hsap-PRDM4</i>  | NP_036538.3  PR domain zinc finger protein                        | SET + 2 Zn-F  | 4                    | n/a                                                                                     |
|                                                                                                                                                                                                                                                                               |                        |                                                   |                                                                            |       | <i>Hsap-PRDM5</i>  | NP_061169.2  PR domain zinc finger protein 5                      | SET + 4 Zn-F  | 5                    | n/a                                                                                     |
|                                                                                                                                                                                                                                                                               |                        |                                                   |                                                                            |       | <i>Hsap-PRDM6</i>  | NP_001129711.1  putative histone-lysine N-methyltransferase PRDM6 | SET + 2 Zn-F  | 6                    | n/a                                                                                     |
|                                                                                                                                                                                                                                                                               |                        |                                                   |                                                                            |       | <i>Hsap-PRDM7</i>  | NP_443722.2  probable histone-lysine N-methyltransferase PRDM7    | -             | 7/9                  | n/a                                                                                     |
|                                                                                                                                                                                                                                                                               |                        |                                                   |                                                                            |       | <i>Hsap-PRDM8</i>  | NP_064611.3  PR domain zinc finger protein 8                      | SET + 1 Zn-F  | 8                    | n/a                                                                                     |
|                                                                                                                                                                                                                                                                               |                        |                                                   |                                                                            |       | <i>Hsap-PRDM9</i>  | NP_064612.2  histone-lysine N-methyltransferase PRDM9             | SET + 11 Zn-F | 7/9                  | n/a                                                                                     |
|                                                                                                                                                                                                                                                                               |                        |                                                   |                                                                            |       | <i>Hsap-PRDM10</i> | NP_955470.1  PR domain zinc finger protein 10                     | SET           | 10/15                | n/a                                                                                     |
|                                                                                                                                                                                                                                                                               |                        |                                                   |                                                                            |       | <i>Hsap-PRDM11</i> | NP_064614.2  PR domain-containing protein 11                      | SET           | 11                   | n/a                                                                                     |
|                                                                                                                                                                                                                                                                               |                        |                                                   |                                                                            |       | <i>Hsap-PRDM12</i> | NP_067632.2  PR domain zinc finger protein 12                     | SET + 2 Zn-F  | 12                   | n/a                                                                                     |
|                                                                                                                                                                                                                                                                               |                        |                                                   |                                                                            |       | <i>Hsap-PRDM13</i> | NP_067633.2  PR domain zinc finger protein 13                     | SET + 1 Zn-F  | 13                   | n/a                                                                                     |
|                                                                                                                                                                                                                                                                               |                        |                                                   |                                                                            |       | <i>Hsap-PRDM14</i> | NP_078780.1  PR domain zinc finger protein 14                     | SET + 2 Zn-F  | 14                   | n/a                                                                                     |
|                                                                                                                                                                                                                                                                               |                        |                                                   |                                                                            |       | <i>Hsap-PRDM15</i> | NP_071398.3  PR domain zinc finger protein 15                     | SET + 2 Zn-F  | 10/15                | n/a                                                                                     |
|                                                                                                                                                                                                                                                                               |                        |                                                   |                                                                            |       | <i>Hsap-PRDM16</i> | NP_071397.3  PR domain zinc finger protein 16                     | SET + 3 Zn-F  | 3/16                 | n/a                                                                                     |
|                                                                                                                                                                                                                                                                               |                        |                                                   |                                                                            |       | <i>Hsap-PRDM17</i> | NP_079017.1  zinc finger protein 408                              | SET + 6 Zn-F  | 17                   | n/a                                                                                     |
| Mammalia<br><i>Craniata; Vertebrata; Gnathostomata; Teleostomi; Euteleostomi; Sarcopterygii; Dipnotetrapodomorpha; Tetrapoda; Amniota; Mammalia; Theria; Eutheria; Euarchontoglires; Primates; Haplorrhini; Simiiformes; Catarrhini; Hominoidea; Hominidae; Hominae; Pan</i>  | <i>Pan troglodytes</i> | Chimpanzee                                        | Ensembl / Washington University School of Medicine and the Broad Institute | 17    | <i>Ptro-PRDM1</i>  | ENSPTRP00000031523                                                | SET + 4 Zn-F  | 1                    | NP_001189 sapiens PR domain zinc finger protein 1 isoform 1 [Homo sapiens]              |
|                                                                                                                                                                                                                                                                               |                        |                                                   |                                                                            |       | <i>Ptro-PRDM2</i>  | ENSPTRP00000059740                                                | -             | 2                    | NP_036363 sapiens PR domain zinc finger protein 2 isoform a [Homo sapiens]              |
|                                                                                                                                                                                                                                                                               |                        |                                                   |                                                                            |       | <i>Ptro-PRDM3</i>  | ENSPTRP00000026847                                                | 2 Zn-F        | 3/16                 | NP_001192123 MDS1 and EVI1 complex locus protein EVI1 isoform b [Homo sapiens]          |
|                                                                                                                                                                                                                                                                               |                        |                                                   |                                                                            |       | <i>Ptro-PRDM4</i>  | ENSPTRP00000009163                                                | SET + 3 Zn-F  | 4                    | NP_036538 PR domain zinc finger protein 4 [Homo sapiens]                                |
|                                                                                                                                                                                                                                                                               |                        |                                                   |                                                                            |       | <i>Ptro-PRDM5</i>  | ENSPTRP00000028170                                                | SET + 2 Zn-F  | 5                    | NP_061169 PR domain zinc finger protein 5 [Homo sapiens]                                |
|                                                                                                                                                                                                                                                                               |                        |                                                   |                                                                            |       | <i>Ptro-PRDM6</i>  | ENSPTRP00000029386                                                | SET + 2 Zn-F  | 6                    | NP_001129711 putative histone-lysine N-methyltransferase PRDM6 [Homo sapiens]           |
|                                                                                                                                                                                                                                                                               |                        |                                                   |                                                                            |       | <i>Ptro-PRDM7</i>  | ENSPTRP00000014513                                                | -             | 7/9                  | NP_001091643 probable histone-lysine N-methyltransferase PRDM7 isoform 1 [Homo sapiens] |
|                                                                                                                                                                                                                                                                               |                        |                                                   |                                                                            |       | <i>Ptro-PRDM8</i>  | ENSPTRP00000027850                                                | SET           | 8                    | NP_001092873 PR domain zinc finger protein 8 [Homo sapiens]                             |
|                                                                                                                                                                                                                                                                               |                        |                                                   |                                                                            |       | <i>Ptro-PRDM9</i>  | ENSPTRP00000048166                                                | 13 Zn-F       | 7/9                  | NP_064612 histone-lysine N-methyltransferase PRDM9 [Homo sapiens]                       |
|                                                                                                                                                                                                                                                                               |                        |                                                   |                                                                            |       | <i>Ptro-PRDM10</i> | ENSPTRP00000007657                                                | -             | 10/15                | NP_064613 PR domain zinc finger protein 10 isoform 1 [Homo sapiens]                     |
|                                                                                                                                                                                                                                                                               |                        |                                                   |                                                                            |       | <i>Ptro-PRDM11</i> | ENSPTRP00000048137                                                | SET           | 11                   | NP_001243625 PR domain-containing protein 11 isoform 2 [Homo sapiens]                   |
|                                                                                                                                                                                                                                                                               |                        |                                                   |                                                                            |       | <i>Ptro-PRDM12</i> | ENSPTRP00000036745                                                | SET + 2 Zn-F  | 12                   | NP_067632 PR domain zinc finger protein 12 [Homo sapiens]                               |
|                                                                                                                                                                                                                                                                               |                        |                                                   |                                                                            |       | <i>Ptro-PRDM13</i> | ENSPTRP00000049811                                                | SET + 2 Zn-F  | 13                   | NP_067633 PR domain zinc finger protein 13 [Homo sapiens]                               |
|                                                                                                                                                                                                                                                                               |                        |                                                   |                                                                            |       | <i>Ptro-PRDM14</i> | ENSPTRP00000034799                                                | SET + 2 Zn-F  | 14                   | NP_078780 PR domain zinc finger protein 14 [Homo sapiens]                               |
|                                                                                                                                                                                                                                                                               |                        |                                                   |                                                                            |       | <i>Ptro-PRDM15</i> | ENSPTRP00000053945                                                | SET + 1 Zn-F  | 10/15                | NP_071398 PR domain zinc finger protein 15 isoform 1 [Homo sapiens]                     |
|                                                                                                                                                                                                                                                                               |                        |                                                   |                                                                            |       | <i>Ptro-PRDM16</i> | ENSPTRP00000052931                                                | SET + 5 Zn-F  | 3/16                 | NP_071397 PR domain zinc finger protein 16 isoform 1 [Homo sapiens]                     |
|                                                                                                                                                                                                                                                                               |                        |                                                   |                                                                            |       | <i>Ptro-PRDM17</i> | ENSPTRP00000006167                                                | 6 Zn-F        | 17                   | NP_079017 zinc finger protein 408 isoform 1 [Homo sapiens]                              |
| Mammalia                                                                                                                                                                                                                                                                      | <i>Pongo abelii</i>    | Orangutan                                         | Ensembl /                                                                  | 15    | <i>Pabe-PDRM1</i>  | ENSPYP00000018898                                                 | SET + 4 Zn-F  | 1                    | NP_001189 PR domain zinc finger protein 1 isoform 1 [Homo sapiens]                      |

**Table S6: Prdm genes in vertebrates.**

| Taxa                                                                                                                                                                                                                                                                                                                                                                                                                            | Species                           | Source of the used sequences / Sequencing centers                                       | # PRDM genes                                                    | Genes                                                                                                                                                                                                                                                                                                                                                                                                                                   | Accession proteins            | Domains        | PRDM family                                               | Best Blast Hit Human                                                                    |                                                                                         |                     |                    |              |                                                                                |
|---------------------------------------------------------------------------------------------------------------------------------------------------------------------------------------------------------------------------------------------------------------------------------------------------------------------------------------------------------------------------------------------------------------------------------|-----------------------------------|-----------------------------------------------------------------------------------------|-----------------------------------------------------------------|-----------------------------------------------------------------------------------------------------------------------------------------------------------------------------------------------------------------------------------------------------------------------------------------------------------------------------------------------------------------------------------------------------------------------------------------|-------------------------------|----------------|-----------------------------------------------------------|-----------------------------------------------------------------------------------------|-----------------------------------------------------------------------------------------|---------------------|--------------------|--------------|--------------------------------------------------------------------------------|
| <p><i>Gnathostomata;</i><br/><i>Teleostomi; Euteleostomi;</i><br/><i>Sarcopterygii;</i><br/><i>Dipnotetrapodomorpha;</i><br/><i>Tetrapoda; Amniota;</i><br/><i>Mammalia; Theria;</i><br/><i>Eutheria;</i><br/><i>Euarchoptogires;</i><br/><i>Primates; Haplorrhini;</i><br/><i>Simiiformes; Catarrhini;</i><br/><i>Hominoidea; Hominidae;</i><br/><i>Ponginae; Pongo</i></p>                                                    |                                   | <p>Washington<br/>University School of<br/>Medicine, Baylor<br/>College of Medicine</p> |                                                                 | <i>Pabe-PDRM2</i>                                                                                                                                                                                                                                                                                                                                                                                                                       | ENSPPYP0000002150             | SET + 1 Zn-F   | 2                                                         | NP_056950 PR domain zinc finger protein 2 isoform b [Homo sapiens]                      |                                                                                         |                     |                    |              |                                                                                |
|                                                                                                                                                                                                                                                                                                                                                                                                                                 |                                   |                                                                                         |                                                                 | <i>Pabe-PDRM3</i>                                                                                                                                                                                                                                                                                                                                                                                                                       | ENSPPYP00000015958            | 2 Zn-F         | 3/16                                                      | NP_001192123 MDS1 and EVI1 complex locus protein EVI1 isoform b [Homo sapiens]          |                                                                                         |                     |                    |              |                                                                                |
|                                                                                                                                                                                                                                                                                                                                                                                                                                 |                                   |                                                                                         |                                                                 | <i>Pabe-PDRM4</i>                                                                                                                                                                                                                                                                                                                                                                                                                       | ENSPPYP00000005606            | SET + 3 Zn-F   | 4                                                         | NP_036538 PR domain zinc finger protein 4 [Homo sapiens]                                |                                                                                         |                     |                    |              |                                                                                |
|                                                                                                                                                                                                                                                                                                                                                                                                                                 |                                   |                                                                                         |                                                                 | <i>Pabe-PDRM5</i>                                                                                                                                                                                                                                                                                                                                                                                                                       | ENSPPYP00000016789            | SET + 4 Zn-F   | 5                                                         | NP_061169 PR domain zinc finger protein 5 [Homo sapiens]                                |                                                                                         |                     |                    |              |                                                                                |
|                                                                                                                                                                                                                                                                                                                                                                                                                                 |                                   |                                                                                         |                                                                 | <i>Pabe-PDRM7</i>                                                                                                                                                                                                                                                                                                                                                                                                                       | ENSPPYP00000008660            | -              | 7/9                                                       | NP_443722 probable histone-lysine N-methyltransferase PRDM7 isoform 2 [Homo sapiens]    |                                                                                         |                     |                    |              |                                                                                |
|                                                                                                                                                                                                                                                                                                                                                                                                                                 |                                   |                                                                                         |                                                                 | <i>Pabe-PDRM8</i>                                                                                                                                                                                                                                                                                                                                                                                                                       | ENSPPYP00000016613            | SET            | 8                                                         | NP_001092873 PR domain zinc finger protein 8 [Homo sapiens]                             |                                                                                         |                     |                    |              |                                                                                |
|                                                                                                                                                                                                                                                                                                                                                                                                                                 |                                   |                                                                                         |                                                                 | <i>Pabe-PDRM9</i>                                                                                                                                                                                                                                                                                                                                                                                                                       | ENSPPYP00000017162            | SET + 9 Zn-F   | 7/9                                                       | NP_064612 histone-lysine N-methyltransferase PRDM9 [Homo sapiens]                       |                                                                                         |                     |                    |              |                                                                                |
|                                                                                                                                                                                                                                                                                                                                                                                                                                 |                                   |                                                                                         |                                                                 | <i>Pabe-PDRM10</i>                                                                                                                                                                                                                                                                                                                                                                                                                      | ENSPPYP00000004643            | SET + 1 Zn-F   | 10/15                                                     | NP_955469 PR domain zinc finger protein 10 isoform 2 [Homo sapiens]                     |                                                                                         |                     |                    |              |                                                                                |
|                                                                                                                                                                                                                                                                                                                                                                                                                                 |                                   |                                                                                         |                                                                 | <i>Pabe-PDRM12</i>                                                                                                                                                                                                                                                                                                                                                                                                                      | ENSPPYP00000022077            | SET + 2 Zn-F   | 12                                                        | NP_067632 PR domain zinc finger protein 12 [Homo sapiens]                               |                                                                                         |                     |                    |              |                                                                                |
|                                                                                                                                                                                                                                                                                                                                                                                                                                 |                                   |                                                                                         |                                                                 | <i>Pabe-PDRM13</i>                                                                                                                                                                                                                                                                                                                                                                                                                      | ENSPPYP00000018880            | SET + 1 Zn-F   | 13                                                        | NP_067633 PR domain zinc finger protein 13 [Homo sapiens]                               |                                                                                         |                     |                    |              |                                                                                |
|                                                                                                                                                                                                                                                                                                                                                                                                                                 |                                   |                                                                                         |                                                                 | <i>Pabe-PDRM14</i>                                                                                                                                                                                                                                                                                                                                                                                                                      | ENSPPYP00000020932            | SET + 2 Zn-F   | 14                                                        | NP_078780 PR domain zinc finger protein 14 [Homo sapiens]                               |                                                                                         |                     |                    |              |                                                                                |
|                                                                                                                                                                                                                                                                                                                                                                                                                                 |                                   |                                                                                         |                                                                 | <i>Pabe-PDRM15</i>                                                                                                                                                                                                                                                                                                                                                                                                                      | ENSPPYP00000012772            | SET + 3 Zn-F   | 10/15                                                     | NP_001035514 PR domain zinc finger protein 15 isoform 2 [Homo sapiens]                  |                                                                                         |                     |                    |              |                                                                                |
|                                                                                                                                                                                                                                                                                                                                                                                                                                 |                                   |                                                                                         |                                                                 | <i>Pabe-PDRM16</i>                                                                                                                                                                                                                                                                                                                                                                                                                      | ENSPPYP00000002283            | SET + 4 Zn-F   | 3/16                                                      | NP_071397 PR domain zinc finger protein 16 isoform 1 [Homo sapiens]                     |                                                                                         |                     |                    |              |                                                                                |
|                                                                                                                                                                                                                                                                                                                                                                                                                                 |                                   |                                                                                         |                                                                 | <i>Pabe-PDRM17</i>                                                                                                                                                                                                                                                                                                                                                                                                                      | ENSPPYP00000003809            | 6 Zn-F         | 17                                                        | NP_079017 zinc finger protein 408 isoform 1 [Homo sapiens]                              |                                                                                         |                     |                    |              |                                                                                |
|                                                                                                                                                                                                                                                                                                                                                                                                                                 |                                   |                                                                                         |                                                                 | <p><b>Mammalia</b></p> <p><i>Craniata; Vertebrata;</i><br/><i>Gnathostomata;</i><br/><i>Teleostomi; Euteleostomi;</i><br/><i>Sarcopterygii;</i><br/><i>Dipnotetrapodomorpha;</i><br/><i>Tetrapoda; Amniota;</i><br/><i>Mammalia; Theria;</i><br/><i>Eutheria;</i><br/><i>Euarchoptogires;</i><br/><i>Primates; Haplorrhini;</i><br/><i>Simiiformes; Catarrhini;</i><br/><i>Hominoidea; Hominidae;</i><br/><i>Homininae; Gorilla</i></p> | <p><i>Gorilla gorilla</i></p> | <p>Gorilla</p> | <p>Ensembl / Wellcome<br/>Trust Sanger<br/>Institute.</p> | <p>16</p>                                                                               | <i>Ggor-PRDM1</i>                                                                       | ENSGGOP0000001899   | SET + 5 Zn-F       | 1            | NP_001189 PR domain zinc finger protein 1 isoform 1 [Homo sapiens]             |
|                                                                                                                                                                                                                                                                                                                                                                                                                                 |                                   |                                                                                         |                                                                 |                                                                                                                                                                                                                                                                                                                                                                                                                                         |                               |                |                                                           |                                                                                         | <i>Ggor-PRDM2</i>                                                                       | ENSGGOP00000022522  | SET + 1 Zn-F       | 2            | NP_056950 PR domain zinc finger protein 2 isoform b [Homo sapiens]             |
|                                                                                                                                                                                                                                                                                                                                                                                                                                 |                                   |                                                                                         |                                                                 |                                                                                                                                                                                                                                                                                                                                                                                                                                         |                               |                |                                                           |                                                                                         | <i>Ggor-PRDM3</i>                                                                       | ENSGGOP000000027124 | 4 Zn-F             | 3/16         | NP_001098547 MDS1 and EVI1 complex locus protein EVI1 isoform a [Homo sapiens] |
| <i>Ggor-PRDM4</i>                                                                                                                                                                                                                                                                                                                                                                                                               | ENSGGOP00000001228                | SET + 3 Zn-F                                                                            | 4                                                               |                                                                                                                                                                                                                                                                                                                                                                                                                                         |                               |                |                                                           |                                                                                         | NP_036538 PR domain zinc finger protein 4 [Homo sapiens]                                |                     |                    |              |                                                                                |
| <i>Ggor-PRDM5</i>                                                                                                                                                                                                                                                                                                                                                                                                               | ENSGGOP00000013231                | 4 Zn-F                                                                                  | 5                                                               |                                                                                                                                                                                                                                                                                                                                                                                                                                         |                               |                |                                                           |                                                                                         | NP_061169 PR domain zinc finger protein 5 [Homo sapiens]                                |                     |                    |              |                                                                                |
| <i>Ggor-PRDM7</i>                                                                                                                                                                                                                                                                                                                                                                                                               | ENSGGOP00000018504                | SET                                                                                     | 7/9                                                             |                                                                                                                                                                                                                                                                                                                                                                                                                                         |                               |                |                                                           |                                                                                         | NP_001091643 probable histone-lysine N-methyltransferase PRDM7 isoform 1 [Homo sapiens] |                     |                    |              |                                                                                |
| <i>Ggor-PRDM8</i>                                                                                                                                                                                                                                                                                                                                                                                                               | ENSGGOP00000007338                | SET + 1 Zn-F                                                                            | 8                                                               |                                                                                                                                                                                                                                                                                                                                                                                                                                         |                               |                |                                                           |                                                                                         | NP_001092873 PR domain zinc finger protein 8 [Homo sapiens]                             |                     |                    |              |                                                                                |
| <i>Ggor-PRDM9</i>                                                                                                                                                                                                                                                                                                                                                                                                               | ENSGGOP000000024099               | SET + 3 Zn-F                                                                            | 7/9                                                             |                                                                                                                                                                                                                                                                                                                                                                                                                                         |                               |                |                                                           |                                                                                         | NP_064612 histone-lysine N-methyltransferase PRDM9 [Homo sapiens]                       |                     |                    |              |                                                                                |
| <i>Ggor-PRDM10</i>                                                                                                                                                                                                                                                                                                                                                                                                              | ENSGGOP00000014988                | SET                                                                                     | 10/15                                                           |                                                                                                                                                                                                                                                                                                                                                                                                                                         |                               |                |                                                           |                                                                                         | NP_064613 PR domain zinc finger protein 10 isoform 1 [Homo sapiens]                     |                     |                    |              |                                                                                |
| <i>Ggor-PRDM11</i>                                                                                                                                                                                                                                                                                                                                                                                                              | ENSGGOP00000016682                | SET                                                                                     | 11                                                              |                                                                                                                                                                                                                                                                                                                                                                                                                                         |                               |                |                                                           |                                                                                         | NP_001243625 PR domain-containing protein 11 isoform 2 [Homo sapiens]                   |                     |                    |              |                                                                                |
| <i>Ggor-PRDM12</i>                                                                                                                                                                                                                                                                                                                                                                                                              | ENSGGOP00000022906                | SET + 3 Zn-F                                                                            | 12                                                              |                                                                                                                                                                                                                                                                                                                                                                                                                                         |                               |                |                                                           |                                                                                         | NP_067632 PR domain zinc finger protein 12 [Homo sapiens]                               |                     |                    |              |                                                                                |
| <i>Ggor-PRDM13</i>                                                                                                                                                                                                                                                                                                                                                                                                              | ENSGGOP00000006795                | SET + 2 Zn-F                                                                            | 13                                                              |                                                                                                                                                                                                                                                                                                                                                                                                                                         |                               |                |                                                           |                                                                                         | NP_067633 PR domain zinc finger protein 13 [Homo sapiens]                               |                     |                    |              |                                                                                |
| <i>Ggor-PRDM14</i>                                                                                                                                                                                                                                                                                                                                                                                                              | ENSGGOP00000011080                | SET + 3 Zn-F                                                                            | 14                                                              |                                                                                                                                                                                                                                                                                                                                                                                                                                         |                               |                |                                                           |                                                                                         | NP_078780 PR domain zinc finger protein 14 [Homo sapiens]                               |                     |                    |              |                                                                                |
| <i>Ggor-PRDM15</i>                                                                                                                                                                                                                                                                                                                                                                                                              | ENSGGOP00000011065                | SET + 1 Zn-F                                                                            | 10/15                                                           |                                                                                                                                                                                                                                                                                                                                                                                                                                         |                               |                |                                                           |                                                                                         | NP_001035514 PR domain zinc finger protein 15 isoform 2 [Homo sapiens]                  |                     |                    |              |                                                                                |
| <i>Ggor-PRDM16</i>                                                                                                                                                                                                                                                                                                                                                                                                              | ENSGGOP00000003707                | SET + 6 Zn-F                                                                            | 3/16                                                            |                                                                                                                                                                                                                                                                                                                                                                                                                                         |                               |                |                                                           |                                                                                         | NP_071397 PR domain zinc finger protein 16 isoform 1 [Homo sapiens]                     |                     |                    |              |                                                                                |
| <i>Ggor-PRDM17</i>                                                                                                                                                                                                                                                                                                                                                                                                              | ENSGGOP00000009907                | 6 Zn-F                                                                                  | 17                                                              |                                                                                                                                                                                                                                                                                                                                                                                                                                         |                               |                |                                                           |                                                                                         | NP_079017 zinc finger protein 408 isoform 1 [Homo sapiens]                              |                     |                    |              |                                                                                |
| <p><b>Mammalia</b></p> <p><i>Craniata; Vertebrata;</i><br/><i>Gnathostomata;</i><br/><i>Teleostomi; Euteleostomi;</i><br/><i>Sarcopterygii;</i><br/><i>Dipnotetrapodomorpha;</i><br/><i>Tetrapoda; Amniota;</i><br/><i>Mammalia; Theria;</i><br/><i>Eutheria;</i><br/><i>Euarchoptogires;</i><br/><i>Primates; Haplorrhini;</i><br/><i>Simiiformes; Catarrhini;</i><br/><i>Hominoidea;</i><br/><i>Hylobatidae; Nomascus</i></p> | <p><i>Nomascus leucogenys</i></p> | <p>Gibbon</p>                                                                           | <p>Ensembl / The Broad<br/>Institute of Harvard<br/>and MIT</p> |                                                                                                                                                                                                                                                                                                                                                                                                                                         |                               |                |                                                           |                                                                                         | <p>16</p>                                                                               | <i>Nleu-PRDM1</i>   | ENSNLEP00000016062 | SET + 5 Zn-F | 1                                                                              |
|                                                                                                                                                                                                                                                                                                                                                                                                                                 |                                   |                                                                                         |                                                                 | <i>Nleu-PRDM2</i>                                                                                                                                                                                                                                                                                                                                                                                                                       | ENSNLEP00000012041            | -              | 2                                                         | NP_001007258 PR domain zinc finger protein 2 isoform c [Homo sapiens]                   |                                                                                         |                     |                    |              |                                                                                |
|                                                                                                                                                                                                                                                                                                                                                                                                                                 |                                   |                                                                                         |                                                                 | <i>Nleu-PRDM3</i>                                                                                                                                                                                                                                                                                                                                                                                                                       | ENSNLEP00000006114            | 4 Zn-F         | 3/16                                                      | NP_001098547 MDS1 and EVI1 complex locus protein EVI1 isoform a [Homo sapiens]          |                                                                                         |                     |                    |              |                                                                                |
|                                                                                                                                                                                                                                                                                                                                                                                                                                 |                                   |                                                                                         |                                                                 | <i>Nleu-PRDM4</i>                                                                                                                                                                                                                                                                                                                                                                                                                       | ENSNLEP00000008216            | SET + 3 Zn-F   | 4                                                         | NP_036538 PR domain zinc finger protein 4 [Homo sapiens]                                |                                                                                         |                     |                    |              |                                                                                |
|                                                                                                                                                                                                                                                                                                                                                                                                                                 |                                   |                                                                                         |                                                                 | <i>Nleu-PRDM5</i>                                                                                                                                                                                                                                                                                                                                                                                                                       | ENSNLEP00000011114            | SET + 4 Zn-F   | 5                                                         | NP_061169 PR domain zinc finger protein 5 [Homo sapiens]                                |                                                                                         |                     |                    |              |                                                                                |
|                                                                                                                                                                                                                                                                                                                                                                                                                                 |                                   |                                                                                         |                                                                 | <i>Nleu-PRDM6</i>                                                                                                                                                                                                                                                                                                                                                                                                                       | ENSNLEP00000014650            | SET + 2 Zn-F   | 6                                                         | NP_001129711 putative histone-lysine N-methyltransferase PRDM6 [Homo sapiens]           |                                                                                         |                     |                    |              |                                                                                |
|                                                                                                                                                                                                                                                                                                                                                                                                                                 |                                   |                                                                                         |                                                                 | <i>Nleu-PRDM7</i>                                                                                                                                                                                                                                                                                                                                                                                                                       | ENSNLEP00000014567            | -              | 7/9                                                       | NP_001091643 probable histone-lysine N-methyltransferase PRDM7 isoform 1 [Homo sapiens] |                                                                                         |                     |                    |              |                                                                                |
|                                                                                                                                                                                                                                                                                                                                                                                                                                 |                                   |                                                                                         |                                                                 | <i>Nleu-PRDM8</i>                                                                                                                                                                                                                                                                                                                                                                                                                       | ENSNLEP00000010355            | SET            | 8                                                         | NP_001092873 PR domain zinc finger protein 8 [Homo sapiens]                             |                                                                                         |                     |                    |              |                                                                                |
|                                                                                                                                                                                                                                                                                                                                                                                                                                 |                                   |                                                                                         |                                                                 | <i>Nleu-PRDM10</i>                                                                                                                                                                                                                                                                                                                                                                                                                      | ENSNLEP00000009110            | SET            | 10/15                                                     | NP_064613 PR domain zinc finger protein 10 isoform 1 [Homo sapiens]                     |                                                                                         |                     |                    |              |                                                                                |

**Table S6: Prdm genes in vertebrates.**

| Taxa            | Species                                                                                                                                                                                                                                                                                 | Source of the used sequences / Sequencing centers | # PRDM genes | Genes                                                                                                                                 | Accession proteins | Domains            | PRDM family         | Best Blast Hit Human                                                  |       |                                                                                        |
|-----------------|-----------------------------------------------------------------------------------------------------------------------------------------------------------------------------------------------------------------------------------------------------------------------------------------|---------------------------------------------------|--------------|---------------------------------------------------------------------------------------------------------------------------------------|--------------------|--------------------|---------------------|-----------------------------------------------------------------------|-------|----------------------------------------------------------------------------------------|
|                 |                                                                                                                                                                                                                                                                                         |                                                   |              | <i>Nleu-PRDM11</i>                                                                                                                    | ENSNLEP00000021837 | SET                | 11                  | NP_001243625 PR domain-containing protein 11 isoform 2 [Homo sapiens] |       |                                                                                        |
|                 |                                                                                                                                                                                                                                                                                         |                                                   |              | <i>Nleu-PRDM12</i>                                                                                                                    | ENSNLEP00000015220 | SET                | 12                  | NP_067632 PR domain zinc finger protein 12 [Homo sapiens]             |       |                                                                                        |
|                 |                                                                                                                                                                                                                                                                                         |                                                   |              | <i>Nleu-PRDM13</i>                                                                                                                    | ENSNLEP00000016799 | SET + 2 Zn-F       | 13                  | NP_067633 PR domain zinc finger protein 13 [Homo sapiens]             |       |                                                                                        |
|                 |                                                                                                                                                                                                                                                                                         |                                                   |              | <i>Nleu-PRDM14</i>                                                                                                                    | ENSNLEP00000013749 | SET + 2 Zn-F       | 14                  | NP_078780 PR domain zinc finger protein 14 [Homo sapiens]             |       |                                                                                        |
|                 |                                                                                                                                                                                                                                                                                         |                                                   |              | <i>Nleu-PRDM15</i>                                                                                                                    | ENSNLEP00000017586 | SET                | 10/15               | NP_071398 PR domain zinc finger protein 15 isoform 1 [Homo sapiens]   |       |                                                                                        |
|                 |                                                                                                                                                                                                                                                                                         |                                                   |              | <i>Nleu-PRDM16</i>                                                                                                                    | ENSNLEP00000009858 | 5 Zn-F             | 3/16                | NP_071397 PR domain zinc finger protein 16 isoform 1 [Homo sapiens]   |       |                                                                                        |
|                 |                                                                                                                                                                                                                                                                                         |                                                   |              | <i>Nleu-PRDM17</i>                                                                                                                    | ENSNLEP00000017179 | 6 Zn-F             | 17                  | NP_079017 zinc finger protein 408 isoform 1 [Homo sapiens]            |       |                                                                                        |
| <b>Mammalia</b> | <i>Craniata; Vertebrata; Gnathostomata; Teleostomi; Euteleostomi; Sarcopterygii; Dipnotetrapodomorpha; Tetrapoda; Amniota; Mammalia; Theria; Eutheria; Euarchontoglires; Primates; Haplorrhini; Simiiformes; Catarrhini; Cercopithecoidea; Cercopithecidae; Cercopithecinae; Macaca</i> | <i>Macaca mulatta</i>                             | Macaque      | Ensembl / Human Genome Sequencing Center - Baylor College of Medicine                                                                 | 15                 | <i>Mmul-PRDM1</i>  | ENSMMPUP00000028193 | SET + 4 Zn-F                                                          | 1     | NP_001189 PR domain zinc finger protein 1 isoform 1 [Homo sapiens]                     |
|                 |                                                                                                                                                                                                                                                                                         |                                                   |              |                                                                                                                                       |                    | <i>Mmul-PRDM2</i>  | ENSMMPUP00000040589 | SET + 1 Zn-F                                                          | 2     | NP_036363 PR domain zinc finger protein 2 isoform a [Homo sapiens]                     |
|                 |                                                                                                                                                                                                                                                                                         |                                                   |              |                                                                                                                                       |                    | <i>Mmul-PRDM3</i>  | ENSMMPUP00000002996 | 4 Zn-F                                                                | 3/16  | NP_001192123 MDS1 and EVI1 complex locus protein EVI1 isoform b [Homo sapiens]         |
|                 |                                                                                                                                                                                                                                                                                         |                                                   |              |                                                                                                                                       |                    | <i>Mmul-PRDM4</i>  | ENSMMPUP00000020397 | SET + 3 Zn-F                                                          | 4     | NP_036538 PR domain zinc finger protein 4 [Homo sapiens]                               |
|                 |                                                                                                                                                                                                                                                                                         |                                                   |              |                                                                                                                                       |                    | <i>Mmul-PRDM5</i>  | ENSMMPUP00000004331 | 4 Zn-F                                                                | 5     | NP_061169 PR domain zinc finger protein 5 [Homo sapiens]                               |
|                 |                                                                                                                                                                                                                                                                                         |                                                   |              |                                                                                                                                       |                    | <i>Mmul-PRDM6</i>  | ENSMMPUP00000013956 | SET + 2 Zn-F                                                          | 6     | NP_001129711 putative histone-lysine N-methyltransferase PRDM6 [Homo sapiens]          |
|                 |                                                                                                                                                                                                                                                                                         |                                                   |              |                                                                                                                                       |                    | <i>Mmul-PRDM7</i>  | ENSMMPUP00000034910 | -                                                                     | 7/9   | NP_443722 probable histone-lysine N-methyltransferase PRDM7 isoform 2 [Homo sapiens]   |
|                 |                                                                                                                                                                                                                                                                                         |                                                   |              |                                                                                                                                       |                    | <i>Mmul-PRDM8</i>  | ENSMMPUP00000004447 | SET + 1 Zn-F                                                          | 8     | NP_001092873 PR domain zinc finger protein 8 [Homo sapiens]                            |
|                 |                                                                                                                                                                                                                                                                                         |                                                   |              |                                                                                                                                       |                    | <i>Mmul-PRDM9</i>  | ENSMMPUP00000005026 | SET + 8 Zn-F                                                          | 7/9   | NP_064612 histone-lysine N-methyltransferase PRDM9 [Homo sapiens]                      |
|                 |                                                                                                                                                                                                                                                                                         |                                                   |              |                                                                                                                                       |                    | <i>Mmul-PRDM10</i> | ENSMMPUP00000036585 | -                                                                     | 10/15 | NP_064613 PR domain zinc finger protein 10 isoform 1 [Homo sapiens]                    |
|                 |                                                                                                                                                                                                                                                                                         |                                                   |              |                                                                                                                                       |                    | <i>Mmul-PRDM11</i> | ENSMMPUP00000019797 | SET                                                                   | 11    | NP_001243625 PR domain-containing protein 11 isoform 2 [Homo sapiens]                  |
|                 |                                                                                                                                                                                                                                                                                         |                                                   |              |                                                                                                                                       |                    | <i>Mmul-PRDM14</i> | ENSMMPUP00000018639 | SET + 3 Zn-F                                                          | 14    | NP_078780 PR domain zinc finger protein 14 [Homo sapiens]                              |
|                 |                                                                                                                                                                                                                                                                                         |                                                   |              |                                                                                                                                       |                    | <i>Mmul-PRDM15</i> | ENSMMPUP00000035665 | SET + 3 Zn-F                                                          | 10/15 | NP_071398 PR domain zinc finger protein 15 isoform 1 [Homo sapiens]                    |
|                 |                                                                                                                                                                                                                                                                                         |                                                   |              |                                                                                                                                       |                    | <i>Mmul-PRDM16</i> | ENSMMPUP00000040662 | SET + 5 Zn-F                                                          | 3/16  | NP_071397 PR domain zinc finger protein 16 isoform 1 [Homo sapiens]                    |
|                 |                                                                                                                                                                                                                                                                                         |                                                   |              |                                                                                                                                       |                    | <i>Mmul-PRDM17</i> | ENSMMPUP00000025849 | 6 Zn-F                                                                | 17    | NP_079017 zinc finger protein 408 isoform 1 [Homo sapiens]                             |
| <b>Mammalia</b> | <i>Craniata; Vertebrata; Gnathostomata; Teleostomi; Euteleostomi; Sarcopterygii; Dipnotetrapodomorpha; Tetrapoda; Amniota; Mammalia; Theria; Eutheria; Euarchontoglires; Primates; Haplorrhini; Simiiformes; Platyrrhini; Cebidae; Callitrichinae; Callitrix</i>                        | <i>Callitrix jacchus</i>                          | Marmoset     | Ensembl / Human Genome Sequencing Center - Baylor College of Medicine and The Genome Center, Washington University School of Medicine | 17                 | <i>Cjac-PRDM1</i>  | ENSCJAP00000011710  | SET + 4 Zn-F                                                          | 1     | NP_001189.2 PR domain zinc finger protein 1 isoform 1 [Homo sapiens]                   |
|                 |                                                                                                                                                                                                                                                                                         |                                                   |              |                                                                                                                                       |                    | <i>Cjac-PRDM2</i>  | ENSCJAP00000025358  | SET + 1 Zn-F                                                          | 2     | NP_056950.2 PR domain zinc finger protein 2 isoform b [Homo sapiens]                   |
|                 |                                                                                                                                                                                                                                                                                         |                                                   |              |                                                                                                                                       |                    | <i>Cjac-PRDM3a</i> | ENSCJAP00000004909  | 4 Zn-F                                                                | 3/16  | NP_005232.2 MDS1 and EVI1 complex locus protein EVI1 isoform b [Homo sapiens]          |
|                 |                                                                                                                                                                                                                                                                                         |                                                   |              |                                                                                                                                       |                    | <i>Cjac-PRDM4</i>  | ENSCJAP00000028158  | SET + 3 Zn-F                                                          | 4     | NP_036538.3 PR domain zinc finger protein 4 [Homo sapiens]                             |
|                 |                                                                                                                                                                                                                                                                                         |                                                   |              |                                                                                                                                       |                    | <i>Cjac-PRDM5</i>  | ENSCJAP00000005738  | SET + 4 Zn-F                                                          | 5     | NP_061169.2 PR domain zinc finger protein 5 [Homo sapiens]                             |
|                 |                                                                                                                                                                                                                                                                                         |                                                   |              |                                                                                                                                       |                    | <i>Cjac-PRDM6</i>  | ENSCJAP00000031870  | SET + 2 Zn-F                                                          | 6     | NP_001129711.1 putative histone-lysine N-methyltransferase PRDM6 [Homo sapiens]        |
|                 |                                                                                                                                                                                                                                                                                         |                                                   |              |                                                                                                                                       |                    | <i>Cjac-PRDM7</i>  | ENSCJAP00000019247  | SET                                                                   | 7/9   | NP_443722.2 probable histone-lysine N-methyltransferase PRDM7 isoform 2 [Homo sapiens] |
|                 |                                                                                                                                                                                                                                                                                         |                                                   |              |                                                                                                                                       |                    | <i>Cjac-PRDM8</i>  | ENSCJAP00000027759  | SET + 1 Zn-F                                                          | 8     | NP_064611.3 PR domain zinc finger protein 8 [Homo sapiens]                             |
|                 |                                                                                                                                                                                                                                                                                         |                                                   |              |                                                                                                                                       |                    | <i>Cjac-PRDM9</i>  | ENSCJAP00000019231  | SET + 11 Zn-F                                                         | 7/9   | NP_064612.2 histone-lysine N-methyltransferase PRDM9 [Homo sapiens]                    |
|                 |                                                                                                                                                                                                                                                                                         |                                                   |              |                                                                                                                                       |                    | <i>Cjac-PRDM10</i> | ENSCJAP00000016976  | SET                                                                   | 10/15 | NP_955470.1 PR domain zinc finger protein 10 isoform 3 [Homo sapiens]                  |
|                 |                                                                                                                                                                                                                                                                                         |                                                   |              |                                                                                                                                       |                    | <i>Cjac-PRDM11</i> | ENSCJAP00000021173  | SET                                                                   | 11    | NP_064614.2 PR domain-containing protein 11 [Homo sapiens] non sens RNA?               |
|                 |                                                                                                                                                                                                                                                                                         |                                                   |              |                                                                                                                                       |                    | <i>Cjac-PRDM12</i> | ENSCJAP00000038158  | SET + 3 Zn-F                                                          | 12    | NP_067632.2 PR domain zinc finger protein 12 [Homo sapiens]                            |
|                 |                                                                                                                                                                                                                                                                                         |                                                   |              |                                                                                                                                       |                    | <i>Cjac-PRDM13</i> | ENSCJAP00000002621  | SET + 2 Zn-F                                                          | 13    | NP_067633.2 PR domain zinc finger protein 13 [Homo sapiens]                            |
|                 |                                                                                                                                                                                                                                                                                         |                                                   |              |                                                                                                                                       |                    | <i>Cjac-PRDM14</i> | ENSCJAP00000014861  | SET + 3 Zn-F                                                          | 14    | NP_078780.1 PR domain zinc finger protein 14 [Homo sapiens]                            |
|                 |                                                                                                                                                                                                                                                                                         |                                                   |              |                                                                                                                                       |                    | <i>Cjac-PRDM15</i> | ENSCJAP00000025414  | SET + 3 Zn-F                                                          | 10/15 | NP_071398.3 PR domain zinc finger protein 15 isoform 1 [Homo sapiens]                  |
|                 |                                                                                                                                                                                                                                                                                         |                                                   |              |                                                                                                                                       |                    | <i>Cjac-PRDM3b</i> | ENSCJAP00000004915  | SET + 4 Zn-F                                                          | 3/16  | NP_071397.3 PR domain zinc finger protein 16 isoform 1 [Homo sapiens]                  |



**Table S6: Prdm genes in vertebrates.**

| Taxa            | Species                                                                                                                                                                                                                                        | Source of the used sequences / Sequencing centers | # PRDM genes    | Genes                                                                                         | Accession proteins | Domains             | PRDM family        | Best Blast Hit Human |                                                               |                                                                                |
|-----------------|------------------------------------------------------------------------------------------------------------------------------------------------------------------------------------------------------------------------------------------------|---------------------------------------------------|-----------------|-----------------------------------------------------------------------------------------------|--------------------|---------------------|--------------------|----------------------|---------------------------------------------------------------|--------------------------------------------------------------------------------|
|                 |                                                                                                                                                                                                                                                |                                                   |                 |                                                                                               | <i>Cjac-PRDM17</i> | ENSCJAP00000042440  | 6 Zn-F             | 17                   | NP_079017.1  zinc finger protein 408 isoform 1 [Homo sapiens] |                                                                                |
| <b>Mammalia</b> | <i>Craniata; Vertebrata; Gnathostomata; Teleostomi; Euteleostomi; Sarcopterygii; Dipnotetrapodomorpha; Tetrapoda; Amniota; Mammalia; Theria; Eutheria; Euarchontoglires; Primates; Haplorrhini; Tarsiiformes; Tarsiidae; Tarsius</i>           | <i>Tarsius syrichta</i>                           | Tarsier         | Ensembl / Human Genome Sequencing Center - Baylor College of Medicine and The Broad Institute | 12                 | <i>Tsyr-PRDM1</i>   | ENSTSYP00000010720 | SET + 5 Zn-F         | 1                                                             | NP_001189 PR domain zinc finger protein 1 isoform 1 [Homo sapiens]             |
|                 |                                                                                                                                                                                                                                                |                                                   |                 |                                                                                               |                    | <i>Tsyr-PRDM2</i>   | ENSTSYP00000003309 | SET                  | 2                                                             | NP_036363 PR domain zinc finger protein 2 isoform a [Homo sapiens]             |
|                 |                                                                                                                                                                                                                                                |                                                   |                 |                                                                                               |                    | <i>Tsyr-PRDM3</i>   | ENSTSYP00000008841 | 5 Zn-F               | 3/16                                                          | NP_001192123 MDS1 and EVI1 complex locus protein EVI1 isoform b [Homo sapiens] |
|                 |                                                                                                                                                                                                                                                |                                                   |                 |                                                                                               |                    | <i>Tsyr-PRDM4</i>   | ENSTSYP00000008494 | SET + 3 Zn-F         | 4                                                             | NP_036538 PR domain zinc finger protein 4 [Homo sapiens]                       |
|                 |                                                                                                                                                                                                                                                |                                                   |                 |                                                                                               |                    | <i>Tsyr-PRDM5</i>   | ENSTSYP00000008844 | SET + 3 Zn-F         | 5                                                             | NP_061169 PR domain zinc finger protein 5 [Homo sapiens]                       |
|                 |                                                                                                                                                                                                                                                |                                                   |                 |                                                                                               |                    | <i>Tsyr-PRDM6</i>   | ENSTSYP00000008643 | SET + 2 Zn-F         | 6                                                             | NP_001129711 putative histone-lysine N-methyltransferase PRDM6 [Homo sapiens]  |
|                 |                                                                                                                                                                                                                                                |                                                   |                 |                                                                                               |                    | <i>Tsyr-PRDM10</i>  | ENSTSYP00000000502 | -                    | 10/15                                                         | NP_064613 PR domain zinc finger protein 10 isoform 1 [Homo sapiens]            |
|                 |                                                                                                                                                                                                                                                |                                                   |                 |                                                                                               |                    | <i>Tsyr-PRDM11</i>  | ENSTSYP00000005870 | SET                  | 11                                                            | NP_001243625 PR domain-containing protein 11 isoform 2 [Homo sapiens]          |
|                 |                                                                                                                                                                                                                                                |                                                   |                 |                                                                                               |                    | <i>Tsyr-PRDM14</i>  | ENSTSYP00000009734 | SET + 3 Zn-F         | 14                                                            | NP_078780 PR domain zinc finger protein 14 [Homo sapiens]                      |
|                 |                                                                                                                                                                                                                                                |                                                   |                 |                                                                                               |                    | <i>Tsyr-PRDM15</i>  | ENSTSYP00000010591 | SET                  | 10/15                                                         | NP_071398 PR domain zinc finger protein 15 isoform 1 [Homo sapiens]            |
|                 |                                                                                                                                                                                                                                                |                                                   |                 |                                                                                               |                    | <i>Tsyr-PRDM16</i>  | ENSTSYP00000013638 | -                    | 3/16                                                          | NP_071397 PR domain zinc finger protein 16 isoform 1 [Homo sapiens]            |
|                 |                                                                                                                                                                                                                                                |                                                   |                 |                                                                                               |                    | <i>Tsyr-PRDM17</i>  | ENSTSYP00000012264 | 3 Zn-F               | 17                                                            | NP_079017 zinc finger protein 408 isoform 1 [Homo sapiens]                     |
| <b>Mammalia</b> | <i>Craniata; Vertebrata; Gnathostomata; Teleostomi; Euteleostomi; Sarcopterygii; Dipnotetrapodomorpha; Tetrapoda; Amniota; Mammalia; Theria; Eutheria; Euarchontoglires; Primates; Strepsirrhini; Lorisiformes; Galagidae; Otollemur</i>       | <i>Otollemur garnettii</i>                        | Galago/Bushbaby | Ensembl / The Broad Institute of Harvard and MIT                                              | 15                 | <i>Ogar-PRDM1</i>   | ENSOGAP00000012568 | SET + 5 Zn-F         | 1                                                             | NP_001189 PR domain zinc finger protein 1 isoform 1 [Homo sapiens]             |
|                 |                                                                                                                                                                                                                                                |                                                   |                 |                                                                                               |                    | <i>Ogar-PRDM2</i>   | ENSOGAP00000007245 | -                    | 2                                                             | NP_036363 PR domain zinc finger protein 2 isoform a [Homo sapiens]             |
|                 |                                                                                                                                                                                                                                                |                                                   |                 |                                                                                               |                    | <i>Ogar-PRDM3</i>   | ENSOGAP00000011484 | SET + 3 Zn-F         | 3/16                                                          | NP_004982 MDS1 and EVI1 complex locus protein EVI1 isoform c [Homo sapiens]    |
|                 |                                                                                                                                                                                                                                                |                                                   |                 |                                                                                               |                    | <i>Ogar-PRDM4</i>   | ENSOGAP00000010688 | SET + 3 Zn-F         | 4                                                             | NP_036538 PR domain zinc finger protein 4 [Homo sapiens]                       |
|                 |                                                                                                                                                                                                                                                |                                                   |                 |                                                                                               |                    | <i>Ogar-PRDM5</i>   | ENSOGAP00000008930 | 3 Zn-F               | 5                                                             | NP_061169 PR domain zinc finger protein 5 [Homo sapiens]                       |
|                 |                                                                                                                                                                                                                                                |                                                   |                 |                                                                                               |                    | <i>Ogar-PRDM8</i>   | ENSOGAP00000019247 | SET + 1 Zn-F         | 8                                                             | NP_001092873 PR domain zinc finger protein 8 [Homo sapiens]                    |
|                 |                                                                                                                                                                                                                                                |                                                   |                 |                                                                                               |                    | <i>Ogar-PRDM7_9</i> | ENSOGAP00000015635 | SET + 6 Zn-F         | 7/9                                                           | NP_064612 histone-lysine N-methyltransferase PRDM9 [Homo sapiens]              |
|                 |                                                                                                                                                                                                                                                |                                                   |                 |                                                                                               |                    | <i>Ogar-PRDM10</i>  | ENSOGAP00000009599 | SET                  | 10/15                                                         | NP_064613 PR domain zinc finger protein 10 isoform 1 [Homo sapiens]            |
|                 |                                                                                                                                                                                                                                                |                                                   |                 |                                                                                               |                    | <i>Ogar-PRDM11</i>  | ENSOGAP00000004093 | SET                  | 11                                                            | NP_001243625 PR domain-containing protein 11 isoform 2 [Homo sapiens]          |
|                 |                                                                                                                                                                                                                                                |                                                   |                 |                                                                                               |                    | <i>Ogar-PRDM12</i>  | ENSOGAP00000006760 | SET + 3 Zn-F         | 12                                                            | NP_067632 PR domain zinc finger protein 12 [Homo sapiens]                      |
|                 |                                                                                                                                                                                                                                                |                                                   |                 |                                                                                               |                    | <i>Ogar-PRDM13</i>  | ENSOGAP00000022042 | SET + 2 Zn-F         | 13                                                            | NP_067633 PR domain zinc finger protein 13 [Homo sapiens]                      |
|                 |                                                                                                                                                                                                                                                |                                                   |                 |                                                                                               |                    | <i>Ogar-PRDM14</i>  | ENSOGAP00000011835 | SET + 2 Zn-F         | 14                                                            | NP_078780 PR domain zinc finger protein 14 [Homo sapiens]                      |
|                 |                                                                                                                                                                                                                                                |                                                   |                 |                                                                                               |                    | <i>Ogar-PRDM15</i>  | ENSOGAP00000005776 | SET + 1 Zn-F         | 10/15                                                         | NP_001035514 PR domain zinc finger protein 15 isoform 2 [Homo sapiens]         |
|                 |                                                                                                                                                                                                                                                |                                                   |                 |                                                                                               |                    | <i>Ogar-PRDM16</i>  | ENSOGAP00000004519 | SET + 6 Zn-F         | 3/16                                                          | NP_071397 PR domain zinc finger protein 16 isoform 1 [Homo sapiens]            |
|                 |                                                                                                                                                                                                                                                |                                                   |                 |                                                                                               |                    | <i>Ogar-PRDM17</i>  | ENSOGAP00000016417 | 6 Zn-F               | 17                                                            | NP_079017 zinc finger protein 408 isoform 1 [Homo sapiens]                     |
| <b>Mammalia</b> | <i>Craniata; Vertebrata; Gnathostomata; Teleostomi; Euteleostomi; Sarcopterygii; Dipnotetrapodomorpha; Tetrapoda; Amniota; Mammalia; Theria; Eutheria; Euarchontoglires; Primates; Strepsirrhini; Lemuriformes; Cheirogaleidae; Microcebus</i> | <i>Microcebus murinus</i>                         | Mouse lemur     | Ensembl / The Broad Institute of Harvard and MIT                                              | 15                 | <i>Mmur-PRDM1</i>   | ENSMICP00000009403 | SET + 5 Zn-F         | 1                                                             | NP_001189 PR domain zinc finger protein 1 isoform 1 [Homo sapiens]             |
|                 |                                                                                                                                                                                                                                                |                                                   |                 |                                                                                               |                    | <i>Mmur-PRDM2</i>   | ENSMICP00000016213 | SET + 1 Zn-F         | 2                                                             | NP_056950 PR domain zinc finger protein 2 isoform b [Homo sapiens]             |
|                 |                                                                                                                                                                                                                                                |                                                   |                 |                                                                                               |                    | <i>Mmur-PRDM3</i>   | ENSMICP00000000539 | 5 Zn-F               | 3/16                                                          | NP_001192123 MDS1 and EVI1 complex locus protein EVI1 isoform b [Homo sapiens] |
|                 |                                                                                                                                                                                                                                                |                                                   |                 |                                                                                               |                    | <i>Mmur-PRDM4</i>   | ENSMICP00000007100 | SET + 3 Zn-F         | 4                                                             | NP_036538 PR domain zinc finger protein 4 [Homo sapiens]                       |
|                 |                                                                                                                                                                                                                                                |                                                   |                 |                                                                                               |                    | <i>Mmur-PRDM5</i>   | ENSMICP0000001336  | 3                    | 5                                                             | NP_061169 PR domain zinc finger protein 5 [Homo sapiens]                       |
|                 |                                                                                                                                                                                                                                                |                                                   |                 |                                                                                               |                    | <i>Mmur-PRDM6</i>   | ENSMICP00000007053 | SET + 3 Zn-F         | 6                                                             | NP_001129711 putative histone-lysine N-methyltransferase PRDM6 [Homo sapiens]  |
|                 |                                                                                                                                                                                                                                                |                                                   |                 |                                                                                               |                    | <i>Mmur-PRDM7_9</i> | ENSMICP00000004601 | SET + 6 Zn-F         | 7/9                                                           | NP_064612 histone-lysine N-methyltransferase PRDM9 [Homo sapiens]              |
|                 |                                                                                                                                                                                                                                                |                                                   |                 |                                                                                               |                    | <i>Mmur-PRDM10</i>  | ENSMICP00000012674 | 1 Zn-F               | 10/15                                                         | NP_955469 PR domain zinc finger protein 10 isoform 2 [Homo sapiens]            |
|                 |                                                                                                                                                                                                                                                |                                                   |                 |                                                                                               |                    | <i>Mmur-PRDM11</i>  | ENSMICP00000012880 | SET                  | 11                                                            | NP_001243625 PR domain-containing protein 11 isoform 2 [Homo sapiens]          |

**Table S6: Prdm genes in vertebrates.**

| Taxa            | Species                                                                                                                                                                                                                                           | Source of the used sequences / Sequencing centers | # PRDM genes | Genes                                            | Accession proteins | Domains             | PRDM family                                                        | Best Blast Hit Human                                                |       |                                                                                |
|-----------------|---------------------------------------------------------------------------------------------------------------------------------------------------------------------------------------------------------------------------------------------------|---------------------------------------------------|--------------|--------------------------------------------------|--------------------|---------------------|--------------------------------------------------------------------|---------------------------------------------------------------------|-------|--------------------------------------------------------------------------------|
|                 |                                                                                                                                                                                                                                                   |                                                   |              | <i>Mmur-PRDM12</i>                               | ENSMICP00000014107 | SET + 3 Zn-F        | 12                                                                 | NP_067632 PR domain zinc finger protein 12 [Homo sapiens]           |       |                                                                                |
|                 |                                                                                                                                                                                                                                                   |                                                   |              | <i>Mmur-PRDM13</i>                               | ENSMICP00000001001 | SET + 2 Zn-F        | 13                                                                 | NP_067633 PR domain zinc finger protein 13 [Homo sapiens]           |       |                                                                                |
|                 |                                                                                                                                                                                                                                                   |                                                   |              | <i>Mmur-PRDM14</i>                               | ENSMICP00000002233 | SET + 2 Zn-F        | 14                                                                 | NP_078780 PR domain zinc finger protein 14 [Homo sapiens]           |       |                                                                                |
|                 |                                                                                                                                                                                                                                                   |                                                   |              | <i>Mmur-PRDM15</i>                               | ENSMICP00000012612 | SET + 1 Zn-F        | 10/15                                                              | NP_071398 PR domain zinc finger protein 15 isoform 1 [Homo sapiens] |       |                                                                                |
|                 |                                                                                                                                                                                                                                                   |                                                   |              | <i>Mmur-PRDM16</i>                               | ENSMICP00000004383 | SET + 4 Zn-F        | 3/16                                                               | NP_955533 PR domain zinc finger protein 16 isoform 2 [Homo sapiens] |       |                                                                                |
|                 |                                                                                                                                                                                                                                                   |                                                   |              | <i>Mmur-PRDM17</i>                               | ENSMICP00000006310 | 6 Zn-F              | 17                                                                 | NP_079017 zinc finger protein 408 isoform 1 [Homo sapiens]          |       |                                                                                |
| <b>Mammalia</b> | <i>Craniata; Vertebrata; Gnathostomata; Teleostomi; Euteleostomi; Sarcopterygii; Dipnotetrapodomorpha; Tetrapoda; Amniota; Mammalia; Theria; Eutheria; Euarchontoglires; Glires; Lagomorpha; Leporidae; Oryctolagus</i>                           | <i>Oryctolagus cuniculus</i>                      | Rabbit       | Ensembl / The Broad Institute of Harvard and MIT | 16                 | <i>Ocun-PRDM1</i>   | ENSOCUP00000013310                                                 | SET + 5 Zn-F                                                        | 1     | NP_001189 PR domain zinc finger protein 1 isoform 1 [Homo sapiens]             |
|                 |                                                                                                                                                                                                                                                   |                                                   |              |                                                  |                    | <i>Ocun-PRDM2</i>   | ENSOCUP00000008278                                                 | 1 Zn-F                                                              | 2     | NP_036363 PR domain zinc finger protein 2 isoform a [Homo sapiens]             |
|                 |                                                                                                                                                                                                                                                   |                                                   |              |                                                  |                    | <i>Ocun-PRDM3</i>   | ENSOCUP00000008768                                                 | 4 Zn-F                                                              | 3/16  | NP_001192123 MDS1 and EVI1 complex locus protein EVI1 isoform 1 [Homo sapiens] |
|                 |                                                                                                                                                                                                                                                   |                                                   |              |                                                  |                    | <i>Ocun-PRDM4</i>   | ENSOCUP000000021480                                                | SET + 3 Zn-F                                                        | 4     | NP_036538 PR domain zinc finger protein 4 [Homo sapiens]                       |
|                 |                                                                                                                                                                                                                                                   |                                                   |              |                                                  |                    | <i>Ocun-PRDM5</i>   | ENSOCUP00000011579                                                 | SET                                                                 | 5     | NP_061169 PR domain zinc finger protein 5 [Homo sapiens]                       |
|                 |                                                                                                                                                                                                                                                   |                                                   |              |                                                  |                    | <i>Ocun-PRDM6</i>   | ENSOCUP00000002997                                                 | SET                                                                 | 6     | NP_001129711 putative histone-lysine N-methyltransferase PRDM6 [Homo sapiens]  |
|                 |                                                                                                                                                                                                                                                   |                                                   |              |                                                  |                    | <i>Ocun-PRDM8</i>   | ENSOCUP00000022376                                                 | SET + 2 Zn-F                                                        | 8     | NP_001092873 PR domain zinc finger protein 8 [Homo sapiens]                    |
|                 |                                                                                                                                                                                                                                                   |                                                   |              |                                                  |                    | <i>Ocun-PRDM7/9</i> | ENSOCUP00000023211                                                 | SET                                                                 | 7/9   | NP_064612 histone-lysine N-methyltransferase PRDM9 [Homo sapiens]              |
|                 |                                                                                                                                                                                                                                                   |                                                   |              |                                                  |                    | <i>Ocun-PRDM10</i>  | ENSOCUP00000003240                                                 | SET                                                                 | 10/15 | NP_064613 PR domain zinc finger protein 10 isoform 1 [Homo sapiens]            |
|                 |                                                                                                                                                                                                                                                   |                                                   |              |                                                  |                    | <i>Ocun-PRDM11</i>  | ENSOCUP00000023331                                                 | SET                                                                 | 11    | NP_001243624 PR domain-containing protein 11 isoform 1 [Homo sapiens]          |
|                 |                                                                                                                                                                                                                                                   |                                                   |              |                                                  |                    | <i>Ocun-PRDM12</i>  | ENSOCUP00000007120                                                 | SET + 3 Zn-F                                                        | 12    | NP_067632 PR domain zinc finger protein 12 [Homo sapiens]                      |
|                 |                                                                                                                                                                                                                                                   |                                                   |              |                                                  |                    | <i>Ocun-PRDM13</i>  | ENSOCUP00000025935                                                 | SET + 2 Zn-F                                                        | 13    | NP_067633 PR domain zinc finger protein 13 [Homo sapiens]                      |
|                 |                                                                                                                                                                                                                                                   |                                                   |              |                                                  |                    | <i>Ocun-PRDM14</i>  | ENSOCUP000000025244                                                | SET + 3 Zn-F                                                        | 14    | NP_078780 PR domain zinc finger protein 14 [Homo sapiens]                      |
|                 |                                                                                                                                                                                                                                                   |                                                   |              |                                                  |                    | <i>Ocun-PRDM15</i>  | ENSOCUP000000025070                                                | -                                                                   | 10/15 | NP_001035514 PR domain zinc finger protein 15 isoform 2 [Homo sapiens]         |
|                 |                                                                                                                                                                                                                                                   |                                                   |              |                                                  |                    | <i>Ocun-PRDM16</i>  | ENSOCUP00000001002                                                 | SET                                                                 | 3/16  | NP_071397 PR domain zinc finger protein 16 isoform 1 [Homo sapiens]            |
|                 |                                                                                                                                                                                                                                                   |                                                   |              |                                                  |                    | <i>Ocun-PRDM17</i>  | ENSOCUP00000002073                                                 | 6 Zn-F                                                              | 17    | NP_001171680 zinc finger protein 408 isoform 2 [Homo sapiens]                  |
| <b>Mammalia</b> | <i>Craniata; Vertebrata; Gnathostomata; Teleostomi; Euteleostomi; Sarcopterygii; Dipnotetrapodomorpha; Tetrapoda; Amniota; Mammalia; Theria; Eutheria; Euarchontoglires; Glires; Rodentia; Sciurognathi; Muroidea; Muridae; Murinae; Mus; Mus</i> | <i>Mus musculus</i>                               | Mouse        | NCBI / Genome Reference Consortium               | 16                 | <i>Mmus-PRDM1</i>   | NP_031574.2  PR domain zinc finger protein 1                       | SET + 5 Zn-F                                                        | 1     | NP_001189 PR domain zinc finger protein 1 isoform 1 [Homo sapiens]             |
|                 |                                                                                                                                                                                                                                                   |                                                   |              |                                                  |                    | <i>Mmus-PRDM2</i>   | NP_001074824.3  retinoblastoma protein-binding zinc finger protein | SET                                                                 | 2     | NP_036363 PR domain zinc finger protein 2 isoform a [Homo sapiens]             |
|                 |                                                                                                                                                                                                                                                   |                                                   |              |                                                  |                    | <i>Mmus-PRDM3</i>   | NP_031989.2  MDS1 and EVI1 complex locus protein EVI1              | 4 Zn-F                                                              | 3/16  | NP_001157471 MDS1 and EVI1 complex locus protein EVI1 isoform d [Homo sapiens] |
|                 |                                                                                                                                                                                                                                                   |                                                   |              |                                                  |                    | <i>Mmus-PRDM4</i>   | NP_857633.2  PR domain zinc finger protein 4                       | SET + 3 Zn-F                                                        | 4     | NP_036538 PR domain zinc finger protein 4 [Homo sapiens]                       |
|                 |                                                                                                                                                                                                                                                   |                                                   |              |                                                  |                    | <i>Mmus-PRDM5</i>   | NP_081823.2  PR domain zinc finger protein 5                       | SET + 4 Zn-F                                                        | 5     | NP_061169 PR domain zinc finger protein 5 [Homo sapiens]                       |
|                 |                                                                                                                                                                                                                                                   |                                                   |              |                                                  |                    | <i>Mmus-PRDM6</i>   | NP_001028453.1  putative histone-lysine N-methyltransferase PRDM6  | SET + 2 Zn-F                                                        | 6     | NP_001129711 putative histone-lysine N-methyltransferase PRDM6 [Homo sapiens]  |
|                 |                                                                                                                                                                                                                                                   |                                                   |              |                                                  |                    | <i>Mmus-PRDM8</i>   | NP_084223.2  PR domain zinc finger protein 8                       | SET + 1 Zn-F                                                        | 8     | NP_001092873 PR domain zinc finger protein 8 [Homo sapiens]                    |
|                 |                                                                                                                                                                                                                                                   |                                                   |              |                                                  |                    | <i>Mmus-PRDM7/9</i> | NP_659058.2  histone-lysine N-methyltransferase PRDM9              | SET + 11 Zn-F                                                       | 7/9   | NP_064612 histone-lysine N-methyltransferase PRDM9 [Homo sapiens]              |
|                 |                                                                                                                                                                                                                                                   |                                                   |              |                                                  |                    | <i>Mmus-PRDM10</i>  | NP_001074286.1  PR domain zinc finger protein 10                   | SET                                                                 | 10/15 | NP_955469 PR domain zinc finger protein 10 isoform 2 [Homo sapiens]            |
|                 |                                                                                                                                                                                                                                                   |                                                   |              |                                                  |                    | <i>Mmus-PRDM11</i>  | NP_001171007.1  PR domain-containing protein 11                    | SET                                                                 | 11    | NP_064614 PR domain-containing protein 11 [Homo sapiens]                       |
|                 |                                                                                                                                                                                                                                                   |                                                   |              |                                                  |                    | <i>Mmus-PRDM12</i>  | NP_001116834.1  PR domain zinc finger protein 12                   | SET + 3 Zn-F                                                        | 12    | NP_067632 PR domain zinc finger protein 12 [Homo sapiens]                      |
|                 |                                                                                                                                                                                                                                                   |                                                   |              |                                                  |                    | <i>Mmus-PRDM13</i>  | NP_001074240.1  PR domain zinc finger protein 13                   | SET + 2 Zn-F                                                        | 13    | NP_067633 PR domain zinc finger protein 13 [Homo sapiens]                      |
|                 |                                                                                                                                                                                                                                                   |                                                   |              |                                                  |                    | <i>Mmus-PRDM14</i>  | NP_001074678.2  PR domain zinc finger protein 14                   | SET + 3 Zn-F                                                        | 14    | NP_078780 PR domain zinc finger protein 14 [Homo sapiens]                      |
|                 |                                                                                                                                                                                                                                                   |                                                   |              |                                                  |                    | <i>Mmus-PRDM15</i>  | NP_659038.2  PR domain containing 15                               | SET + 1 Zn-F                                                        | 10/15 | NP_001035514 PR domain zinc finger protein 15 isoform 2 [Homo sapiens]         |
|                 |                                                                                                                                                                                                                                                   |                                                   |              |                                                  |                    | <i>Mmus-PRDM16</i>  | NP_081780.3  PR domain zinc finger protein 16                      | SET + 6 Zn-F                                                        | 3/16  | NP_071397 PR domain zinc finger protein 16 isoform 1 [Homo sapiens]            |
|                 |                                                                                                                                                                                                                                                   |                                                   |              |                                                  |                    | <i>Mmus-PRDM17</i>  | NP_001028623.1  zinc finger protein 408                            | 5 Zn-F                                                              | 17    | NP_001171680 zinc finger protein 408 isoform 2 [Homo sapiens]                  |
| <b>Mammalia</b> | <i>Craniata; Vertebrata; Gnathostomata;</i>                                                                                                                                                                                                       | <i>Rattus norvegicus</i>                          | Rat          | Ensembl / Human Genome Sequencing                | 15                 | <i>Rnor-PRDM1</i>   | ENSRNOP00000040939                                                 | SET + 5 Zn-F                                                        | 1     | NP_001189 PR domain zinc finger protein 1 isoform 1 [Homo sapiens]             |

**Table S6: Prdm genes in vertebrates.**

| Taxa                                                                                                                                                                                                | Species                                                                                                                                                                                                                        | Source of the used sequences / Sequencing centers | # PRDM genes | Genes               | Accession proteins                                                                                                                                                                                                                                    | Domains                           | PRDM family | Best Blast Hit Human                                                           |    |                                                                                |                    |                   |                    |                                                                    |   |                                                                    |
|-----------------------------------------------------------------------------------------------------------------------------------------------------------------------------------------------------|--------------------------------------------------------------------------------------------------------------------------------------------------------------------------------------------------------------------------------|---------------------------------------------------|--------------|---------------------|-------------------------------------------------------------------------------------------------------------------------------------------------------------------------------------------------------------------------------------------------------|-----------------------------------|-------------|--------------------------------------------------------------------------------|----|--------------------------------------------------------------------------------|--------------------|-------------------|--------------------|--------------------------------------------------------------------|---|--------------------------------------------------------------------|
| Teleostomi; Euteleostomi; Sarcopterygii; Dipnotetrapodomorpha; Tetrapoda; Amniota; Mammalia; Theria; Eutheria; Euarchontoglires; Glires; Rodentia; Sciurognathi; Muroidea; Muridae; Murinae; Rattus | Center - Baylor College of Medicine                                                                                                                                                                                            |                                                   |              | <i>Rnor-PRDM2</i>   | ENSRNOP00000046011                                                                                                                                                                                                                                    | SET                               | 2           | NP_036363 PR domain zinc finger protein 2 isoform a [Homo sapiens]             |    |                                                                                |                    |                   |                    |                                                                    |   |                                                                    |
|                                                                                                                                                                                                     |                                                                                                                                                                                                                                |                                                   |              | <i>Rnor-PRDM3</i>   | ENSRNOP00000060380                                                                                                                                                                                                                                    | 4 Zn-F                            | 3/16        | NP_001192123 MDS1 and EVI1 complex locus protein EVI1 isoform b [Homo sapiens] |    |                                                                                |                    |                   |                    |                                                                    |   |                                                                    |
|                                                                                                                                                                                                     |                                                                                                                                                                                                                                |                                                   |              | <i>Rnor-PRDM4</i>   | ENSRNOP00000066886                                                                                                                                                                                                                                    | SET + 3 Zn-F                      | 4           | NP_036538 PR domain zinc finger protein 4 [Homo sapiens]                       |    |                                                                                |                    |                   |                    |                                                                    |   |                                                                    |
|                                                                                                                                                                                                     |                                                                                                                                                                                                                                |                                                   |              | <i>Rnor-PRDM5</i>   | ENSRNOP0000009569                                                                                                                                                                                                                                     | SET + 2 Zn-F                      | 5           | NP_061169 PR domain zinc finger protein 5 [Homo sapiens]                       |    |                                                                                |                    |                   |                    |                                                                    |   |                                                                    |
|                                                                                                                                                                                                     |                                                                                                                                                                                                                                |                                                   |              | <i>Rnor-PRDM6</i>   | ENSRNOP00000041369                                                                                                                                                                                                                                    | SET + 2 Zn-F                      | 6           | NP_001129711 putative histone-lysine N-methyltransferase PRDM6 [Homo sapiens]  |    |                                                                                |                    |                   |                    |                                                                    |   |                                                                    |
|                                                                                                                                                                                                     |                                                                                                                                                                                                                                |                                                   |              | <i>Rnor-PRDM8</i>   | ENSRNOP0000002746                                                                                                                                                                                                                                     | SET + 1 Zn-F                      | 8           | NP_001092873 PR domain zinc finger protein 8 [Homo sapiens]                    |    |                                                                                |                    |                   |                    |                                                                    |   |                                                                    |
|                                                                                                                                                                                                     |                                                                                                                                                                                                                                |                                                   |              | <i>Rnor-PRDM7/9</i> | ENSRNOP00000060531                                                                                                                                                                                                                                    | SET + 9 Zn-F                      | 7/9         | NP_064612 histone-lysine N-methyltransferase PRDM9 [Homo sapiens]              |    |                                                                                |                    |                   |                    |                                                                    |   |                                                                    |
|                                                                                                                                                                                                     |                                                                                                                                                                                                                                |                                                   |              | <i>Rnor-PRDM10</i>  | ENSRNOP00000010423                                                                                                                                                                                                                                    | SET                               | 10/15       | NP_955469 PR domain zinc finger protein 10 isoform 2 [Homo sapiens]            |    |                                                                                |                    |                   |                    |                                                                    |   |                                                                    |
|                                                                                                                                                                                                     |                                                                                                                                                                                                                                |                                                   |              | <i>Rnor-PRDM11</i>  | ENSRNOP00000061592                                                                                                                                                                                                                                    | SET                               | 11          | NP_001243625 PR domain-containing protein 11 isoform 2 [Homo sapiens]          |    |                                                                                |                    |                   |                    |                                                                    |   |                                                                    |
|                                                                                                                                                                                                     |                                                                                                                                                                                                                                |                                                   |              | <i>Rnor-PRDM12</i>  | ENSRNOP00000012234                                                                                                                                                                                                                                    | SET + 3 Zn-F                      | 12          | NP_067632 PR domain zinc finger protein 12 [Homo sapiens]                      |    |                                                                                |                    |                   |                    |                                                                    |   |                                                                    |
|                                                                                                                                                                                                     |                                                                                                                                                                                                                                |                                                   |              | <i>Rnor-PRDM13</i>  | ENSRNOP00000010126                                                                                                                                                                                                                                    | SET + 2 Zn-F                      | 13          | NP_067633 PR domain zinc finger protein 13 [Homo sapiens]                      |    |                                                                                |                    |                   |                    |                                                                    |   |                                                                    |
|                                                                                                                                                                                                     |                                                                                                                                                                                                                                |                                                   |              | <i>Rnor-PRDM14</i>  | ENSRNOP00000032955                                                                                                                                                                                                                                    | SET + 3 Zn-F                      | 14          | NP_078780 PR domain zinc finger protein 14 [Homo sapiens]                      |    |                                                                                |                    |                   |                    |                                                                    |   |                                                                    |
|                                                                                                                                                                                                     |                                                                                                                                                                                                                                |                                                   |              | <i>Rnor-PRDM15</i>  | ENSRNOP00000041592                                                                                                                                                                                                                                    | SET + 1 Zn-F                      | 10/15       | NP_001035514 PR domain zinc finger protein 15 isoform 2 [Homo sapiens]         |    |                                                                                |                    |                   |                    |                                                                    |   |                                                                    |
|                                                                                                                                                                                                     |                                                                                                                                                                                                                                |                                                   |              | <i>Rnor-PRDM16</i>  | ENSRNOP00000064955                                                                                                                                                                                                                                    | SET + 5 Zn-F                      | 3/16        | NP_071397 PR domain zinc finger protein 16 isoform 1 [Homo sapiens]            |    |                                                                                |                    |                   |                    |                                                                    |   |                                                                    |
|                                                                                                                                                                                                     |                                                                                                                                                                                                                                |                                                   |              | Mammalia            | <i>Craniata; Vertebrata; Gnathostomata; Teleostomi; Euteleostomi; Sarcopterygii; Dipnotetrapodomorpha; Tetrapoda; Amniota; Mammalia; Theria; Eutheria; Euarchontoglires; Glires; Rodentia; Sciurognathi; Sciuridae; Xerinae; Marmotini; Ictidomys</i> | <i>Ictidomys tridecemlineatus</i> | Squirrel    | Ensembl / The Broad Institute of Harvard and MIT                               | 15 | <i>Itri_PRDM1</i>                                                              | ENSSTOP00000014774 | SET + 4 Zn-F      | 1                  | NP_001189 PR domain zinc finger protein 1 isoform 1 [Homo sapiens] |   |                                                                    |
|                                                                                                                                                                                                     |                                                                                                                                                                                                                                |                                                   |              |                     |                                                                                                                                                                                                                                                       |                                   |             |                                                                                |    | <i>Itri_PRDM2</i>                                                              | ENSSTOP00000023607 | -                 | 2                  | NP_036363 PR domain zinc finger protein 2 isoform a [Homo sapiens] |   |                                                                    |
| <i>Itri_PRDM3</i>                                                                                                                                                                                   | ENSSTOP00000011991                                                                                                                                                                                                             | 2 Zn-F                                            | 3/16         |                     |                                                                                                                                                                                                                                                       |                                   |             |                                                                                |    | NP_001192123 MDS1 and EVI1 complex locus protein EVI1 isoform b [Homo sapiens] |                    |                   |                    |                                                                    |   |                                                                    |
| <i>Itri_PRDM4</i>                                                                                                                                                                                   | ENSSTOP00000014476                                                                                                                                                                                                             | SET + 3 Zn-F                                      | 4            |                     |                                                                                                                                                                                                                                                       |                                   |             |                                                                                |    | NP_036538 PR domain zinc finger protein 4 [Homo sapiens]                       |                    |                   |                    |                                                                    |   |                                                                    |
| <i>Itri_PRDM5</i>                                                                                                                                                                                   | ENSSTOP00000004269                                                                                                                                                                                                             | 1 Zn-F                                            | 5            |                     |                                                                                                                                                                                                                                                       |                                   |             |                                                                                |    | NP_061169 PR domain zinc finger protein 5 [Homo sapiens]                       |                    |                   |                    |                                                                    |   |                                                                    |
| <i>Itri_PRDM6</i>                                                                                                                                                                                   | ENSSTOP00000005736                                                                                                                                                                                                             | SET                                               | 6            |                     |                                                                                                                                                                                                                                                       |                                   |             |                                                                                |    | NP_001129711 putative histone-lysine N-methyltransferase PRDM6 [Homo sapiens]  |                    |                   |                    |                                                                    |   |                                                                    |
| <i>Itri_PRDM8</i>                                                                                                                                                                                   | ENSSTOP00000014046                                                                                                                                                                                                             | SET + 1 Zn-F                                      | 8            |                     |                                                                                                                                                                                                                                                       |                                   |             |                                                                                |    | NP_001092873 PR domain zinc finger protein 8 [Homo sapiens]                    |                    |                   |                    |                                                                    |   |                                                                    |
| <i>Itri_PRDM10</i>                                                                                                                                                                                  | ENSSTOP00000001797                                                                                                                                                                                                             | SET                                               | 10/15        |                     |                                                                                                                                                                                                                                                       |                                   |             |                                                                                |    | NP_955469 PR domain zinc finger protein 10 isoform 2 [Homo sapiens]            |                    |                   |                    |                                                                    |   |                                                                    |
| <i>Itri_PRDM11</i>                                                                                                                                                                                  | ENSSTOP00000015970                                                                                                                                                                                                             | SET                                               | 11           |                     |                                                                                                                                                                                                                                                       |                                   |             |                                                                                |    | NP_001243624 PR domain-containing protein 11 isoform 1 [Homo sapiens]          |                    |                   |                    |                                                                    |   |                                                                    |
| <i>Itri_PRDM12</i>                                                                                                                                                                                  | ENSSTOP00000005349                                                                                                                                                                                                             | SET + 3 Zn-F                                      | 12           |                     |                                                                                                                                                                                                                                                       |                                   |             |                                                                                |    | NP_067632 PR domain zinc finger protein 12 [Homo sapiens]                      |                    |                   |                    |                                                                    |   |                                                                    |
| <i>Itri_PRDM13</i>                                                                                                                                                                                  | ENSSTOP00000014829                                                                                                                                                                                                             | SET + 2 Zn-F                                      | 13           |                     |                                                                                                                                                                                                                                                       |                                   |             |                                                                                |    | NP_067633 PR domain zinc finger protein 13 [Homo sapiens]                      |                    |                   |                    |                                                                    |   |                                                                    |
| <i>Itri_PRDM14</i>                                                                                                                                                                                  | ENSSTOP00000021117                                                                                                                                                                                                             | 2 Zn-F                                            | 14           |                     |                                                                                                                                                                                                                                                       |                                   |             |                                                                                |    | NP_078780 PR domain zinc finger protein 14 [Homo sapiens]                      |                    |                   |                    |                                                                    |   |                                                                    |
| <i>Itri_PRDM15</i>                                                                                                                                                                                  | ENSSTOP00000000232                                                                                                                                                                                                             | SET + 1 Zn-F                                      | 10/15        |                     |                                                                                                                                                                                                                                                       |                                   |             |                                                                                |    | NP_001035514 PR domain zinc finger protein 15 isoform 2 [Homo sapiens]         |                    |                   |                    |                                                                    |   |                                                                    |
| <i>Itri_PRDM16</i>                                                                                                                                                                                  | ENSSTOP00000019543                                                                                                                                                                                                             | 3 Zn-F                                            | 3/16         |                     |                                                                                                                                                                                                                                                       |                                   |             |                                                                                |    | NP_071397 PR domain zinc finger protein 16 isoform 1 [Homo sapiens]            |                    |                   |                    |                                                                    |   |                                                                    |
| <i>Itri_PRDM17</i>                                                                                                                                                                                  | ENSSTOP00000004585                                                                                                                                                                                                             | 4 Zn-F                                            | 17           |                     |                                                                                                                                                                                                                                                       |                                   |             |                                                                                |    | NP_079017 zinc finger protein 408 isoform 1 [Homo sapiens]                     |                    |                   |                    |                                                                    |   |                                                                    |
| Mammalia                                                                                                                                                                                            | <i>Craniata; Vertebrata; Gnathostomata; Teleostomi; Euteleostomi; Sarcopterygii; Dipnotetrapodomorpha; Tetrapoda; Amniota; Mammalia; Theria; Eutheria; Euarchontoglires; Glires; Rodentia; Hystricognathi; Caviidae; Cavia</i> | <i>Cavia porcellus</i>                            | Guinea pig   |                     |                                                                                                                                                                                                                                                       |                                   |             |                                                                                |    | Ensembl / The Broad Institute of Harvard and MIT                               | 14                 | <i>Cpor-PRDM1</i> | ENSCPOP00000012667 | SET + 4 Zn-F                                                       | 1 | NP_001189 PR domain zinc finger protein 1 isoform 1 [Homo sapiens] |
|                                                                                                                                                                                                     |                                                                                                                                                                                                                                |                                                   |              |                     |                                                                                                                                                                                                                                                       |                                   |             |                                                                                |    |                                                                                |                    | <i>Cpor-PRDM2</i> | ENSCPOP00000013075 | SET + 1 Zn-F                                                       | 2 | NP_056950 PR domain zinc finger protein 2 isoform b [Homo sapiens] |
|                                                                                                                                                                                                     |                                                                                                                                                                                                                                |                                                   |              | <i>Cpor-PRDM3</i>   | ENSCPOP00000012219                                                                                                                                                                                                                                    | 4 Zn-F                            | 3/16        | NP_001192123 MDS1 and EVI1 complex locus protein EVI1 isoform b [Homo sapiens] |    |                                                                                |                    |                   |                    |                                                                    |   |                                                                    |
|                                                                                                                                                                                                     |                                                                                                                                                                                                                                |                                                   |              | <i>Cpor-PRDM4</i>   | ENSCPOP00000016082                                                                                                                                                                                                                                    | SET + 4 Zn-F                      | 4           | NP_036538 PR domain zinc finger protein 4 [Homo sapiens]                       |    |                                                                                |                    |                   |                    |                                                                    |   |                                                                    |
|                                                                                                                                                                                                     |                                                                                                                                                                                                                                |                                                   |              | <i>Cpor-PRDM5</i>   | ENSCPOP00000011596                                                                                                                                                                                                                                    | SET + 2 Zn-F                      | 5           | NP_061169 PR domain zinc finger protein 5 [Homo sapiens]                       |    |                                                                                |                    |                   |                    |                                                                    |   |                                                                    |
|                                                                                                                                                                                                     |                                                                                                                                                                                                                                |                                                   |              | <i>Cpor-PRDM6</i>   | ENSCPOP00000003841                                                                                                                                                                                                                                    | SET                               | 6           | NP_001129711 putative histone-lysine N-methyltransferase PRDM6 [Homo sapiens]  |    |                                                                                |                    |                   |                    |                                                                    |   |                                                                    |
|                                                                                                                                                                                                     |                                                                                                                                                                                                                                |                                                   |              | <i>Cpor-PRDM8</i>   | ENSCPOP00000016305                                                                                                                                                                                                                                    | SET + 2 Zn-F                      | 8           | NP_001092873 PR domain zinc finger protein 8 [Homo sapiens]                    |    |                                                                                |                    |                   |                    |                                                                    |   |                                                                    |
|                                                                                                                                                                                                     |                                                                                                                                                                                                                                |                                                   |              | <i>Cpor-PRDM10</i>  | ENSCPOP00000000340                                                                                                                                                                                                                                    | SET                               | 10/15       | NP_955469 PR domain zinc finger protein 10 isoform 2 [Homo sapiens]            |    |                                                                                |                    |                   |                    |                                                                    |   |                                                                    |

**Table S6: Prdm genes in vertebrates.**

| Taxa            | Species                                                                                                                                                                                                          | Source of the used sequences / Sequencing centers | # PRDM genes     | Genes                                                                                 | Accession proteins | Domains             | PRDM family         | Best Blast Hit Human                                                   |       |                                                                                |
|-----------------|------------------------------------------------------------------------------------------------------------------------------------------------------------------------------------------------------------------|---------------------------------------------------|------------------|---------------------------------------------------------------------------------------|--------------------|---------------------|---------------------|------------------------------------------------------------------------|-------|--------------------------------------------------------------------------------|
|                 |                                                                                                                                                                                                                  |                                                   |                  | <i>Cpor-PRDM11</i>                                                                    | ENSCPOP00000017055 | SET                 | 11                  | NP_001243625 PR domain-containing protein 11 isoform 2 [Homo sapiens]  |       |                                                                                |
|                 |                                                                                                                                                                                                                  |                                                   |                  | <i>Cpor-PRDM12</i>                                                                    | ENSCPOP00000005323 | SET + 3 Zn-F        | 12                  | NP_067632 PR domain zinc finger protein 12 [Homo sapiens]              |       |                                                                                |
|                 |                                                                                                                                                                                                                  |                                                   |                  | <i>Cpor-PRDM13</i>                                                                    | ENSCPOP00000017578 | SET + 1 Zn-F        | 13                  | NP_067633 PR domain zinc finger protein 13 [Homo sapiens]              |       |                                                                                |
|                 |                                                                                                                                                                                                                  |                                                   |                  | <i>Cpor-PRDM14</i>                                                                    | ENSCPOP00000015743 | SET + 3 Zn-F        | 14                  | NP_078780 PR domain zinc finger protein 14 [Homo sapiens]              |       |                                                                                |
|                 |                                                                                                                                                                                                                  |                                                   |                  | <i>Cpor-PRDM15</i>                                                                    | ENSCPOP00000019896 | 1 Zn-F              | 10/15               | NP_001035514 PR domain zinc finger protein 15 isoform 2 [Homo sapiens] |       |                                                                                |
|                 |                                                                                                                                                                                                                  |                                                   |                  | <i>Cpor-PRDM16</i>                                                                    | ENSCPOP00000010339 | SET + 4 Zn-F        | 3/16                | NP_071397 PR domain zinc finger protein 16 isoform 1 [Homo sapiens]    |       |                                                                                |
| <b>Mammalia</b> | <i>Craniata; Vertebrata; Gnathostomata; Teleostomi; Euteleostomi; Sarcopterygii; Dipnotetrapodomorpha; Tetrapoda; Amniota; Mammalia; Theria; Eutheria; Afrotheria; Proboscidea; Elephantidae; Loxodonta</i>      | <i>Loxodonta africana</i>                         | African elephant | Ensembl / The Broad Institute of Harvard and MIT                                      | 16                 | <i>Lafr-PRDM1</i>   | ENSLAFP00000019226  | SET + 4 Zn-F                                                           | 1     | NP_001189 PR domain zinc finger protein 1 isoform 1 [Homo sapiens]             |
|                 |                                                                                                                                                                                                                  |                                                   |                  |                                                                                       |                    | <i>Lafr-PRDM2</i>   | ENSLAFP00000010222  | SET + 1 Zn-F                                                           | 2     | NP_036363 PR domain zinc finger protein 2 isoform a [Homo sapiens]             |
|                 |                                                                                                                                                                                                                  |                                                   |                  |                                                                                       |                    | <i>Lafr-PRDM3</i>   | ENSLAFP00000009593  | 4 Zn-F                                                                 | 3/16  | NP_001157472 MDS1 and EVI1 complex locus protein EVI1 isoform c [Homo sapiens] |
|                 |                                                                                                                                                                                                                  |                                                   |                  |                                                                                       |                    | <i>Lafr-PRDM4</i>   | ENSLAFP00000001236  | SET + 4 Zn-F                                                           | 4     | NP_036538 PR domain zinc finger protein 4 [Homo sapiens]                       |
|                 |                                                                                                                                                                                                                  |                                                   |                  |                                                                                       |                    | <i>Lafr-PRDM5</i>   | ENSLAFP00000005482  | SET + 4 Zn-F                                                           | 5     | NP_061169 PR domain zinc finger protein 5 [Homo sapiens]                       |
|                 |                                                                                                                                                                                                                  |                                                   |                  |                                                                                       |                    | <i>Lafr-PRDM6</i>   | ENSLAFP000000021823 | SET + 2 Zn-F                                                           | 6     | NP_001129711 putative histone-lysine N-methyltransferase PRDM6 [Homo sapiens]  |
|                 |                                                                                                                                                                                                                  |                                                   |                  |                                                                                       |                    | <i>Lafr-PRDM7/9</i> | ENSLAFP000000017573 | SET                                                                    | 7/9   | NP_064612 histone-lysine N-methyltransferase PRDM9 [Homo sapiens]              |
|                 |                                                                                                                                                                                                                  |                                                   |                  |                                                                                       |                    | <i>Lafr-PRDM8</i>   | ENSLAFP00000013567  | SET                                                                    | 8     | NP_001092873 PR domain zinc finger protein 8 [Homo sapiens]                    |
|                 |                                                                                                                                                                                                                  |                                                   |                  |                                                                                       |                    | <i>Lafr-PRDM10</i>  | ENSLAFP000000020955 | -                                                                      | 10/15 | NP_064613 PR domain zinc finger protein 10 isoform 1 [Homo sapiens]            |
|                 |                                                                                                                                                                                                                  |                                                   |                  |                                                                                       |                    | <i>Lafr-PRDM11</i>  | ENSLAFP00000000917  | SET                                                                    | 11    | NP_064614 PR domain-containing protein 11 [Homo sapiens]                       |
|                 |                                                                                                                                                                                                                  |                                                   |                  |                                                                                       |                    | <i>Lafr-PRDM12</i>  | ENSLAFP00000005864  | SET + 3 Zn-F                                                           | 12    | NP_067632 PR domain zinc finger protein 12 [Homo sapiens]                      |
|                 |                                                                                                                                                                                                                  |                                                   |                  |                                                                                       |                    | <i>Lafr-PRDM13</i>  | ENSLAFP000000021409 | 2 Zn-F                                                                 | 13    | NP_067633 PR domain zinc finger protein 13 [Homo sapiens]                      |
|                 |                                                                                                                                                                                                                  |                                                   |                  |                                                                                       |                    | <i>Lafr-PRDM14</i>  | ENSLAFP00000013111  | SET + 3 Zn-F                                                           | 14    | NP_078780 PR domain zinc finger protein 14 [Homo sapiens]                      |
|                 |                                                                                                                                                                                                                  |                                                   |                  |                                                                                       |                    | <i>Lafr-PRDM15</i>  | ENSLAFP000000007452 | SET + 1 Zn-F                                                           | 10/15 | NP_001035514 PR domain zinc finger protein 15 isoform 2 [Homo sapiens]         |
|                 |                                                                                                                                                                                                                  |                                                   |                  |                                                                                       |                    | <i>Lafr-PRDM16</i>  | ENSLAFP00000000902  | SET + 6 Zn-F                                                           | 3/16  | NP_071397 PR domain zinc finger protein 16 isoform 1 [Homo sapiens]            |
|                 |                                                                                                                                                                                                                  |                                                   |                  |                                                                                       |                    | <i>Lafr-PRDM17</i>  | ENSLAFP00000019611  | 5 Zn-F                                                                 | 17    | NP_079017 zinc finger protein 408 isoform 1 [Homo sapiens]                     |
| <b>Mammalia</b> | <i>Craniata; Vertebrata; Gnathostomata; Teleostomi; Euteleostomi; Sarcopterygii; Dipnotetrapodomorpha; Tetrapoda; Amniota; Mammalia; Theria; Eutheria; Laurasiatheria; Perissodactyla; Equidae; Equus; Equus</i> | <i>Equus caballus</i>                             | Horse            | Ensembl / The Broad Institute of Harvard and MIT                                      | 15                 | <i>Ecab-PRDM1</i>   | ENSECAP00000007075  | SET + 5 Zn-F                                                           | 1     | NP_001189 PR domain zinc finger protein 1 isoform 1 [Homo sapiens]             |
|                 |                                                                                                                                                                                                                  |                                                   |                  |                                                                                       |                    | <i>Ecab-PRDM2</i>   | ENSECAP00000006928  | SET + 1 Zn-F                                                           | 2     | NP_036363 PR domain zinc finger protein 2 isoform a [Homo sapiens]             |
|                 |                                                                                                                                                                                                                  |                                                   |                  |                                                                                       |                    | <i>Ecab-PRDM3</i>   | ENSECAP00000018770  | 4 Zn-F                                                                 | 3/16  | NP_001192123 MDS1 and EVI1 complex locus protein EVI1 isoform b [Homo sapiens] |
|                 |                                                                                                                                                                                                                  |                                                   |                  |                                                                                       |                    | <i>Ecab-PRDM4</i>   | ENSECAP00000013230  | SET + 3 Zn-F                                                           | 4     | NP_036538 PR domain zinc finger protein 4 [Homo sapiens]                       |
|                 |                                                                                                                                                                                                                  |                                                   |                  |                                                                                       |                    | <i>Ecab-PRDM5</i>   | ENSECAP00000009516  | 4 Zn-F                                                                 | 5     | NP_061169 PR domain zinc finger protein 5 [Homo sapiens]                       |
|                 |                                                                                                                                                                                                                  |                                                   |                  |                                                                                       |                    | <i>Ecab-PRDM6</i>   | ENSECAP00000003259  | SET + 2 Zn-F                                                           | 6     | NP_001129711 putative histone-lysine N-methyltransferase PRDM6 [Homo sapiens]  |
|                 |                                                                                                                                                                                                                  |                                                   |                  |                                                                                       |                    | <i>Ecab-PRDM8</i>   | ENSECAP00000015312  | SET                                                                    | 8     | NP_001092873 PR domain zinc finger protein 8 [Homo sapiens]                    |
|                 |                                                                                                                                                                                                                  |                                                   |                  |                                                                                       |                    | <i>Ecab-PRDM10</i>  | ENSECAP00000009737  | SET                                                                    | 10/15 | NP_064613 PR domain zinc finger protein 10 isoform 1 [Homo sapiens]            |
|                 |                                                                                                                                                                                                                  |                                                   |                  |                                                                                       |                    | <i>Ecab-PRDM11</i>  | ENSECAP000000021045 | SET                                                                    | 11    | NP_001243625 PR domain-containing protein 11 isoform 2 [Homo sapiens]          |
|                 |                                                                                                                                                                                                                  |                                                   |                  |                                                                                       |                    | <i>Ecab-PRDM12</i>  | ENSECAP00000004143  | SET                                                                    | 12    | NP_067632 PR domain zinc finger protein 12 [Homo sapiens]                      |
|                 |                                                                                                                                                                                                                  |                                                   |                  |                                                                                       |                    | <i>Ecab-PRDM13</i>  | ENSECAP00000005846  | SET + 1 Zn-F                                                           | 13    | NP_067633 PR domain zinc finger protein 13 [Homo sapiens]                      |
|                 |                                                                                                                                                                                                                  |                                                   |                  |                                                                                       |                    | <i>Ecab-PRDM14</i>  | ENSECAP00000012409  | SET + 3 Zn-F                                                           | 14    | NP_078780 PR domain zinc finger protein 14 [Homo sapiens]                      |
|                 |                                                                                                                                                                                                                  |                                                   |                  |                                                                                       |                    | <i>Ecab-PRDM15</i>  | ENSECAP00000015039  | SET + 1 Zn-F                                                           | 10/15 | NP_001035514 PR domain zinc finger protein 15 isoform 2 [Homo sapiens]         |
|                 |                                                                                                                                                                                                                  |                                                   |                  |                                                                                       |                    | <i>Ecab-PRDM16</i>  | ENSECAP00000015057  | SET + 6 Zn-F                                                           | 16    | NP_071397 PR domain zinc finger protein 16 isoform 1 [Homo sapiens]            |
|                 |                                                                                                                                                                                                                  |                                                   |                  |                                                                                       |                    | <i>Ecab-PRDM17</i>  | ENSECAP00000008742  | 6 Zn-F                                                                 | 17    | NP_001171680 zinc finger protein 408 isoform 2 [Homo sapiens]                  |
| <b>Mammalia</b> | <i>Craniata; Vertebrata; Gnathostomata; Teleostomi; Euteleostomi; Sarcopterygii; Dipnotetrapodomorpha; Tetrapoda; Amniota; Mammalia; Theria</i>                                                                  | <i>Bos taurus</i>                                 | Cow              | Ensembl / Center for Bioinformatics and Computational Biology, University of Maryland | 16                 | <i>Btau-PRDM1</i>   | ENSBTAP00000001081  | SET + 4 Zn-F                                                           | 1     | NP_001189 PR domain zinc finger protein 1 isoform 1 [Homo sapiens]             |
|                 |                                                                                                                                                                                                                  |                                                   |                  |                                                                                       |                    | <i>Btau-PRDM2</i>   | ENSBTAP000000027387 | SET + 1 Zn-F                                                           | 2     | NP_036363 PR domain zinc finger protein 2 isoform a [Homo sapiens]             |
|                 |                                                                                                                                                                                                                  |                                                   |                  |                                                                                       |                    | <i>Btau-PRDM3</i>   | ENSBTAP000000007717 | 2 Zn-F                                                                 | 3/16  | NP_001098547 MDS1 and EVI1 complex locus protein EVI1 isoform a [Homo sapiens] |
|                 |                                                                                                                                                                                                                  |                                                   |                  |                                                                                       |                    | <i>Btau-PRDM4</i>   | ENSBTAP00000017284  | SET + 3 Zn-F                                                           | 4     | NP_036538 PR domain zinc finger protein 4 [Homo sapiens]                       |

**Table S6: Prdm genes in vertebrates.**

| Taxa                                                                                                                                                                                                                                         | Species                 | Source of the used sequences / Sequencing centers | # PRDM genes                                     | Genes                                                                                                                                                                                                                      | Accession proteins  | Domains       | PRDM family                                      | Best Blast Hit Human                                                           |                   |
|----------------------------------------------------------------------------------------------------------------------------------------------------------------------------------------------------------------------------------------------|-------------------------|---------------------------------------------------|--------------------------------------------------|----------------------------------------------------------------------------------------------------------------------------------------------------------------------------------------------------------------------------|---------------------|---------------|--------------------------------------------------|--------------------------------------------------------------------------------|-------------------|
| Mammalia<br><i>Eutheria; Laurasiatheria; Cetartiodactyla; Ruminantia; Pecora; Bovidae; Bovinae; Bos</i>                                                                                                                                      |                         |                                                   |                                                  | <i>Btau-PRDM5</i>                                                                                                                                                                                                          | ENSBTAP00000046605  | SET + 4 Zn-F  | 5                                                | NP_061169 PR domain zinc finger protein 5 [Homo sapiens]                       |                   |
|                                                                                                                                                                                                                                              |                         |                                                   |                                                  | <i>Btau-PRDM6</i>                                                                                                                                                                                                          | ENSBTAP00000027421  | SET + 2 Zn-F  | 6                                                | NP_001129711 putative histone-lysine N-methyltransferase PRDM6 [Homo sapiens]  |                   |
|                                                                                                                                                                                                                                              |                         |                                                   |                                                  | <i>Btau-PRDM8</i>                                                                                                                                                                                                          | ENSBTAP00000046130  | SET + 4 Zn-F  | 8                                                | NP_001092873 PR domain zinc finger protein 8 [Homo sapiens]                    |                   |
|                                                                                                                                                                                                                                              |                         |                                                   |                                                  | <i>Btau-PRDM7/9</i>                                                                                                                                                                                                        | ENSBTAP00000047652  | SET + 13 Zn-F | 7/9                                              | NP_064612 histone-lysine N-methyltransferase PRDM9 [Homo sapiens]              |                   |
|                                                                                                                                                                                                                                              |                         |                                                   |                                                  | <i>Btau-PRDM10</i>                                                                                                                                                                                                         | ENSBTAP00000025295  | SET + 1 Zn-F  | 10/15                                            | NP_955469 PR domain zinc finger protein 10 isoform 2 [Homo sapiens]            |                   |
|                                                                                                                                                                                                                                              |                         |                                                   |                                                  | <i>Btau-PRDM11</i>                                                                                                                                                                                                         | ENSBTAP00000008450  | SET           | 11                                               | NP_001243625 PR domain-containing protein 11 isoform 2 [Homo sapiens]          |                   |
|                                                                                                                                                                                                                                              |                         |                                                   |                                                  | <i>Btau-PRDM12</i>                                                                                                                                                                                                         | ENSBTAP00000032579  | SET + 2 Zn-F  | 12                                               | NP_067632 PR domain zinc finger protein 12 [Homo sapiens]                      |                   |
|                                                                                                                                                                                                                                              |                         |                                                   |                                                  | <i>Btau-PRDM13</i>                                                                                                                                                                                                         | ENSBTAP00000008009  | SET + 1 Zn-F  | 13                                               | NP_067633 PR domain zinc finger protein 13 [Homo sapiens]                      |                   |
|                                                                                                                                                                                                                                              |                         |                                                   |                                                  | <i>Btau-PRDM14</i>                                                                                                                                                                                                         | ENSBTAP00000000066  | SET + 2 Zn-F  | 14                                               | NP_078780 PR domain zinc finger protein 14 [Homo sapiens]                      |                   |
|                                                                                                                                                                                                                                              |                         |                                                   |                                                  | <i>Btau-PRDM15</i>                                                                                                                                                                                                         | ENSBTAP00000056120  | SET + 1 Zn-F  | 10/15                                            | NP_071398 PR domain zinc finger protein 15 isoform 1 [Homo sapiens]            |                   |
|                                                                                                                                                                                                                                              |                         |                                                   |                                                  | <i>Btau-PRDM16</i>                                                                                                                                                                                                         | ENSBTAP00000025245  | SET + 3 Zn-F  | 3/16                                             | NP_071397 PR domain zinc finger protein 16 isoform 1 [Homo sapiens]            |                   |
|                                                                                                                                                                                                                                              |                         |                                                   |                                                  | <i>Btau-PRDM17</i>                                                                                                                                                                                                         | ENSBTAP00000039420  | 5 Zn-F        | 17                                               | NP_079017 zinc finger protein 408 isoform 1 [Homo sapiens]                     |                   |
|                                                                                                                                                                                                                                              |                         |                                                   |                                                  | Mammalia<br><i>Craniata; Vertebrata; Gnathostomata; Teleostomi; Euteleostomi; Sarcopterygii; Dipnotetrapodomorpha; Tetrapoda; Amniota; Mammalia; Theria; Eutheria; Laurasiatheria; Cetartiodactyla; Suina; Suidae; Sus</i> | <i>Sus scrofa</i>   | Pig           | Ensembl / The Swine Genome Sequencing Consortium | 16                                                                             | <i>Sscr-PRDM1</i> |
| <i>Sscr-PRDM2</i>                                                                                                                                                                                                                            | ENSSSCP00000006634      | -                                                 | 2                                                |                                                                                                                                                                                                                            |                     |               |                                                  | NP_056950 PR domain zinc finger protein 2 isoform b [Homo sapiens]             |                   |
| <i>Sscr-PRDM3</i>                                                                                                                                                                                                                            | ENSSSCP00000012514      | SET + 4 Zn-F                                      | 3/16                                             |                                                                                                                                                                                                                            |                     |               |                                                  | NP_004982 MDS1 and EVI1 complex locus protein EVI1 isoform c [Homo sapiens]    |                   |
| <i>Sscr-PRDM4</i>                                                                                                                                                                                                                            | ENSSSCP00000000167      | SET + 3 Zn-F                                      | 4                                                |                                                                                                                                                                                                                            |                     |               |                                                  | NP_036538 PR domain zinc finger protein 4 [Homo sapiens]                       |                   |
| <i>Sscr-PRDM5</i>                                                                                                                                                                                                                            | ENSSSCP00000009710      | 3 Zn-F                                            | 5                                                |                                                                                                                                                                                                                            |                     |               |                                                  | NP_061169 PR domain zinc finger protein 5 [Homo sapiens]                       |                   |
| <i>Sscr-PRDM6</i>                                                                                                                                                                                                                            | ENSSSCP00000015146      | SET + 2 Zn-F                                      | 6                                                |                                                                                                                                                                                                                            |                     |               |                                                  | NP_001129711 putative histone-lysine N-methyltransferase PRDM6 [Homo sapiens]  |                   |
| <i>Sscr-PRDM8</i>                                                                                                                                                                                                                            | ENSSSCP00000009869      | SET                                               | 8                                                |                                                                                                                                                                                                                            |                     |               |                                                  | NP_001092873 PR domain zinc finger protein 8 [Homo sapiens]                    |                   |
| <i>Sscr-PRDM7/9</i>                                                                                                                                                                                                                          | ENSSSCP00000023246      | SET + 9 Zn-F                                      | 7/9                                              |                                                                                                                                                                                                                            |                     |               |                                                  | NP_064612 histone-lysine N-methyltransferase PRDM9 [Homo sapiens]              |                   |
| <i>Sscr-PRDM10</i>                                                                                                                                                                                                                           | ENSSSCP00000016167      | SET                                               | 10/15                                            |                                                                                                                                                                                                                            |                     |               |                                                  | NP_064613 PR domain zinc finger protein 10 isoform 1 [Homo sapiens]            |                   |
| <i>Sscr-PRDM11</i>                                                                                                                                                                                                                           | ENSSSCP00000014108      | SET                                               | 11                                               |                                                                                                                                                                                                                            |                     |               |                                                  | NP_001243625 PR domain-containing protein 11 isoform 2 [Homo sapiens]          |                   |
| <i>Sscr-PRDM12</i>                                                                                                                                                                                                                           | ENSSSCP00000006110      | SET + 3 Zn-F                                      | 12                                               |                                                                                                                                                                                                                            |                     |               |                                                  | NP_067632 PR domain zinc finger protein 12 [Homo sapiens]                      |                   |
| <i>Sscr-PRDM13</i>                                                                                                                                                                                                                           | ENSSSCP00000004698      | SET + 2 Zn-F                                      | 13                                               |                                                                                                                                                                                                                            |                     |               |                                                  | NP_067633 PR domain zinc finger protein 13 [Homo sapiens]                      |                   |
| <i>Sscr-PRDM14</i>                                                                                                                                                                                                                           | ENSSSCP00000006606      | SET + 3 Zn-F                                      | 14                                               |                                                                                                                                                                                                                            |                     |               |                                                  | NP_078780 PR domain zinc finger protein 14 [Homo sapiens]                      |                   |
| <i>Sscr-PRDM15</i>                                                                                                                                                                                                                           | ENSSSCP00000012866      | SET + 1 Zn-F                                      | 10/15                                            |                                                                                                                                                                                                                            |                     |               |                                                  | NP_071398 PR domain zinc finger protein 15 isoform 1 [Homo sapiens]            |                   |
| <i>Sscr-PRDM16</i>                                                                                                                                                                                                                           | ENSSSCP00000020637      | SET + 6 Zn-F                                      | 3/16                                             |                                                                                                                                                                                                                            |                     |               |                                                  | NP_071397 PR domain zinc finger protein 16 isoform 1 [Homo sapiens]            |                   |
| <i>Sscr-PRDM17</i>                                                                                                                                                                                                                           | ENSSSCP00000023673      | 6 Zn-F                                            | 17                                               |                                                                                                                                                                                                                            |                     |               |                                                  | NP_001171680 zinc finger protein 408 isoform 2 [Homo sapiens]                  |                   |
| Mammalia<br><i>Craniata; Vertebrata; Gnathostomata; Teleostomi; Euteleostomi; Sarcopterygii; Dipnotetrapodomorpha; Tetrapoda; Amniota; Mammalia; Theria; Eutheria; Laurasiatheria; Chiroptera; Microchiroptera; Vespertilionidae; Myotis</i> | <i>Myotis lucifugus</i> | Microbat                                          | Ensembl / The Broad Institute of Harvard and MIT |                                                                                                                                                                                                                            |                     |               |                                                  | 15                                                                             | <i>Mluc-PRDM1</i> |
|                                                                                                                                                                                                                                              |                         |                                                   |                                                  | <i>Mluc-PRDM2</i>                                                                                                                                                                                                          | ENSMMLUP00000006376 | SET + 1 Zn-F  | 2                                                | NP_036363 PR domain zinc finger protein 2 isoform a [Homo sapiens]             |                   |
|                                                                                                                                                                                                                                              |                         |                                                   |                                                  | <i>Mluc-PRDM3</i>                                                                                                                                                                                                          | ENSMMLUP00000014351 | 4 Zn-F        | 3/16                                             | NP_001192123 MDS1 and EVI1 complex locus protein EVI1 isoform b [Homo sapiens] |                   |
|                                                                                                                                                                                                                                              |                         |                                                   |                                                  | <i>Mluc-PRDM4</i>                                                                                                                                                                                                          | ENSMMLUP00000000704 | SET + 3 Zn-F  | 4                                                | NP_036538 PR domain zinc finger protein 4 [Homo sapiens]                       |                   |
|                                                                                                                                                                                                                                              |                         |                                                   |                                                  | <i>Mluc-PRDM5</i>                                                                                                                                                                                                          | ENSMMLUP00000005570 | 2 Zn-F        | 5                                                | NP_061169 PR domain zinc finger protein 5 [Homo sapiens]                       |                   |
|                                                                                                                                                                                                                                              |                         |                                                   |                                                  | <i>Mluc-PRDM6</i>                                                                                                                                                                                                          | ENSMMLUP00000009157 | SET + 2 Zn-F  | 6                                                | NP_001129711 putative histone-lysine N-methyltransferase PRDM6 [Homo sapiens]  |                   |
|                                                                                                                                                                                                                                              |                         |                                                   |                                                  | <i>Mluc-PRDM8</i>                                                                                                                                                                                                          | ENSMMLUP00000018201 | SET + 1 Zn-F  | 8                                                | NP_001092873 PR domain zinc finger protein 8 [Homo sapiens]                    |                   |
|                                                                                                                                                                                                                                              |                         |                                                   |                                                  | <i>Mluc-PRDM7/9</i>                                                                                                                                                                                                        | ENSMMLUP00000009197 | SET           | 7/9                                              | NP_064612 histone-lysine N-methyltransferase PRDM9 [Homo sapiens]              |                   |
|                                                                                                                                                                                                                                              |                         |                                                   |                                                  | <i>Mluc-PRDM10</i>                                                                                                                                                                                                         | ENSMMLUP00000019425 | SET           | 10/15                                            | NP_064613 PR domain zinc finger protein 10 isoform 1 [Homo sapiens]            |                   |

**Table S6: Prdm genes in vertebrates.**

| Taxa            | Species                                                                                                                                                                                                                                             | Source of the used sequences / Sequencing centers | # PRDM genes | Genes                                                    | Accession proteins  | Domains             | PRDM family         | Best Blast Hit Human                                                  |       |                                                                                         |
|-----------------|-----------------------------------------------------------------------------------------------------------------------------------------------------------------------------------------------------------------------------------------------------|---------------------------------------------------|--------------|----------------------------------------------------------|---------------------|---------------------|---------------------|-----------------------------------------------------------------------|-------|-----------------------------------------------------------------------------------------|
|                 |                                                                                                                                                                                                                                                     |                                                   |              | <i>Mluc-PRDM11</i>                                       | ENSMMLUP00000015895 | SET                 | 11                  | NP_001243624 PR domain-containing protein 11 isoform 1 [Homo sapiens] |       |                                                                                         |
|                 |                                                                                                                                                                                                                                                     |                                                   |              | <i>Mluc-PRDM12</i>                                       | ENSMMLUP00000011265 | SET + 2 Zn-F        | 12                  | NP_067632 PR domain zinc finger protein 12 [Homo sapiens]             |       |                                                                                         |
|                 |                                                                                                                                                                                                                                                     |                                                   |              | <i>Mluc-PRDM13</i>                                       | ENSMMLUP0000001730  | SET + 2 Zn-F        | 13                  | NP_067633 PR domain zinc finger protein 13 [Homo sapiens]             |       |                                                                                         |
|                 |                                                                                                                                                                                                                                                     |                                                   |              | <i>Mluc-PRDM14</i>                                       | ENSMMLUP00000006946 | SET + 3 Zn-F        | 14                  | NP_078780 PR domain zinc finger protein 14 [Homo sapiens]             |       |                                                                                         |
|                 |                                                                                                                                                                                                                                                     |                                                   |              | <i>Mluc-PRDM15</i>                                       | ENSMMLUP0000001001  | SET + 1 Zn-F        | 10/15               | NP_071398 PR domain zinc finger protein 15 isoform 1 [Homo sapiens]   |       |                                                                                         |
|                 |                                                                                                                                                                                                                                                     |                                                   |              | <i>Mluc-PRDM17</i>                                       | ENSMMLUP00000016078 | 4 Zn-F              | 17                  | NP_079017 zinc finger protein 408 isoform 1 [Homo sapiens]            |       |                                                                                         |
| <b>Mammalia</b> | <i>Craniata; Vertebrata; Gnathostomata; Teleostomi; Euteleostomi; Sarcopterygii; Dipnotetrapodomorpha; Tetrapoda; Amniota; Mammalia; Theria; Eutheria; Laurasiatheria; Carnivora; Feliformia; Felidae; Felinae; Felis</i>                           | <i>Felis catus</i>                                | Cat          | Ensembl / International Cat Genome Sequencing Consortium | 16                  | <i>Fcat-PRDM1</i>   | ENSFCAPE00000009991 | SET + 4 Zn-F                                                          | 1     | NP_001189 PR domain zinc finger protein 1 isoform 1 [Homo sapiens]                      |
|                 |                                                                                                                                                                                                                                                     |                                                   |              |                                                          |                     | <i>Fcat-PRDM2</i>   | ENSFCAPE00000022446 | SET                                                                   | 2     | NP_036363 PR domain zinc finger protein 2 isoform a [Homo sapiens]                      |
|                 |                                                                                                                                                                                                                                                     |                                                   |              |                                                          |                     | <i>Fcat-PRDM3</i>   | ENSFCAPE00000011745 | SET + 4 Zn-F                                                          | 3/16  | NP_001098547 MDS1 and EVI1 complex locus protein EVI1 isoform a [Homo sapiens]          |
|                 |                                                                                                                                                                                                                                                     |                                                   |              |                                                          |                     | <i>Fcat-PRDM4</i>   | ENSFCAPE00000017415 | SET + 3 Zn-F                                                          | 4     | NP_036538 PR domain zinc finger protein 4 [Homo sapiens]                                |
|                 |                                                                                                                                                                                                                                                     |                                                   |              |                                                          |                     | <i>Fcat-PRDM5</i>   | ENSFCAPE00000023804 | 1 Zn-F                                                                | 5     | NP_061169 PR domain zinc finger protein 5 [Homo sapiens]                                |
|                 |                                                                                                                                                                                                                                                     |                                                   |              |                                                          |                     | <i>Fcat-PRDM6</i>   | ENSFCAPE00000016968 | SET + 2 Zn-F                                                          | 6     | NP_001129711 putative histone-lysine N-methyltransferase PRDM6 [Homo sapiens]           |
|                 |                                                                                                                                                                                                                                                     |                                                   |              |                                                          |                     | <i>Fcat-PRDM8</i>   | ENSFCAPE00000019355 | SET                                                                   | 8     | NP_001092873 PR domain zinc finger protein 8 [Homo sapiens]                             |
|                 |                                                                                                                                                                                                                                                     |                                                   |              |                                                          |                     | <i>Fcat-PRDM7/9</i> | ENSFCAPE00000003508 | SET                                                                   | 7/9   | NP_001091643 probable histone-lysine N-methyltransferase PRDM7 isoform 1 [Homo sapiens] |
|                 |                                                                                                                                                                                                                                                     |                                                   |              |                                                          |                     | <i>Fcat-PRDM10</i>  | ENSFCAPE00000003791 | SET                                                                   | 10/15 | NP_955469 PR domain zinc finger protein 10 isoform 2 [Homo sapiens]                     |
|                 |                                                                                                                                                                                                                                                     |                                                   |              |                                                          |                     | <i>Fcat-PRDM11</i>  | ENSFCAPE00000006188 | SET                                                                   | 11    | NP_064614 PR domain-containing protein 11 [Homo sapiens]                                |
|                 |                                                                                                                                                                                                                                                     |                                                   |              |                                                          |                     | <i>Fcat-PRDM12</i>  | ENSFCAPE00000016661 | SET + 2 Zn-F                                                          | 12    | NP_067632 PR domain zinc finger protein 12 [Homo sapiens]                               |
|                 |                                                                                                                                                                                                                                                     |                                                   |              |                                                          |                     | <i>Fcat-PRDM13</i>  | ENSFCAPE00000009553 | SET + 2 Zn-F                                                          | 13    | NP_067633 PR domain zinc finger protein 13 [Homo sapiens]                               |
|                 |                                                                                                                                                                                                                                                     |                                                   |              |                                                          |                     | <i>Fcat-PRDM14</i>  | ENSFCAPE00000001333 | SET + 3 Zn-F                                                          | 14    | NP_078780 PR domain zinc finger protein 14 [Homo sapiens]                               |
|                 |                                                                                                                                                                                                                                                     |                                                   |              |                                                          |                     | <i>Fcat-PRDM15</i>  | ENSFCAPE00000011771 | SET + 2 Zn-F                                                          | 10/15 | NP_071398 PR domain zinc finger protein 15 isoform 1 [Homo sapiens]                     |
|                 |                                                                                                                                                                                                                                                     |                                                   |              |                                                          |                     | <i>Fcat-PRDM16</i>  | ENSFCAPE00000012503 | SET + 2 Zn-F                                                          | 3/16  | NP_071397 PR domain zinc finger protein 16 isoform 1 [Homo sapiens]                     |
|                 |                                                                                                                                                                                                                                                     |                                                   |              |                                                          |                     | <i>Fcat-PRDM17</i>  | ENSFCAPE00000017836 | 6 Zn-F                                                                | 17    | NP_001171680 zinc finger protein 408 isoform 2 [Homo sapiens]                           |
| <b>Mammalia</b> | <i>Craniata; Vertebrata; Gnathostomata; Teleostomi; Euteleostomi; Sarcopterygii; Dipnotetrapodomorpha; Tetrapoda; Amniota; Mammalia; Theria; Eutheria; Laurasiatheria; Carnivora; Caniformia; Mustelidae; Mustelinae; Mustela; Mustela putorius</i> | <i>Mustela putorius furo</i>                      | Ferret       | Ensembl / The Broad Institute of Harvard and MIT         | 16                  | <i>Mput-PRDM1</i>   | ENSMMPUP00000009446 | SET + 4 Zn-F                                                          | 1     | NP_001189 PR domain zinc finger protein 1 isoform 1 [Homo sapiens]                      |
|                 |                                                                                                                                                                                                                                                     |                                                   |              |                                                          |                     | <i>Mput-PRDM2</i>   | ENSMMPUP00000016249 | -                                                                     | 2     | NP_036363 PR domain zinc finger protein 2 isoform a [Homo sapiens]                      |
|                 |                                                                                                                                                                                                                                                     |                                                   |              |                                                          |                     | <i>Mput-PRDM3</i>   | ENSMMPUP00000016975 | SET + 4 Zn-F                                                          | 3/16  | NP_004982 MDS1 and EVI1 complex locus protein EVI1 isoform c [Homo sapiens]             |
|                 |                                                                                                                                                                                                                                                     |                                                   |              |                                                          |                     | <i>Mput-PRDM4</i>   | ENSMMPUP00000012141 | SET + 3 Zn-F                                                          | 4     | NP_036538 PR domain zinc finger protein 4 [Homo sapiens]                                |
|                 |                                                                                                                                                                                                                                                     |                                                   |              |                                                          |                     | <i>Mput-PRDM5</i>   | ENSMMPUP00000017305 | SET + 4 Zn-F                                                          | 5     | NP_061169 PR domain zinc finger protein 5 [Homo sapiens]                                |
|                 |                                                                                                                                                                                                                                                     |                                                   |              |                                                          |                     | <i>Mput-PRDM6</i>   | ENSMMPUP00000012865 | SET + 2 Zn-F                                                          | 6     | NP_001129711 putative histone-lysine N-methyltransferase PRDM6 [Homo sapiens]           |
|                 |                                                                                                                                                                                                                                                     |                                                   |              |                                                          |                     | <i>Mput-PRDM8</i>   | ENSMMPUP00000006502 | SET                                                                   | 8     | NP_001092873 PR domain zinc finger protein 8 [Homo sapiens]                             |
|                 |                                                                                                                                                                                                                                                     |                                                   |              |                                                          |                     | <i>Mput-PRDM7/9</i> | ENSMMPUP00000006803 | SET + 1 Zn-F                                                          | 7/9   | NP_064612 histone-lysine N-methyltransferase PRDM9 [Homo sapiens]                       |
|                 |                                                                                                                                                                                                                                                     |                                                   |              |                                                          |                     | <i>Mput-PRDM10</i>  | ENSMMPUP00000008641 | SET                                                                   | 10/15 | NP_955469 PR domain zinc finger protein 10 isoform 2 [Homo sapiens]                     |
|                 |                                                                                                                                                                                                                                                     |                                                   |              |                                                          |                     | <i>Mput-PRDM11</i>  | ENSMMPUP00000005967 | SET                                                                   | 11    | NP_001243625 PR domain-containing protein 11 isoform 2 [Homo sapiens]                   |
|                 |                                                                                                                                                                                                                                                     |                                                   |              |                                                          |                     | <i>Mput-PRDM12</i>  | ENSMMPUP00000012594 | SET                                                                   | 12    | NP_067632 PR domain zinc finger protein 12 [Homo sapiens]                               |
|                 |                                                                                                                                                                                                                                                     |                                                   |              |                                                          |                     | <i>Mput-PRDM13</i>  | ENSMMPUP0000001631  | SET + 2 Zn-F                                                          | 13    | NP_067633 PR domain zinc finger protein 13 [Homo sapiens]                               |
|                 |                                                                                                                                                                                                                                                     |                                                   |              |                                                          |                     | <i>Mput-PRDM14</i>  | ENSMMPUP00000010550 | SET + 1 Zn-F                                                          | 14    | NP_078780 PR domain zinc finger protein 14 [Homo sapiens]                               |
|                 |                                                                                                                                                                                                                                                     |                                                   |              |                                                          |                     | <i>Mput-PRDM15</i>  | ENSMMPUP00000008868 | SET + 1 Zn-F                                                          | 10/15 | NP_001035514 PR domain zinc finger protein 15 isoform 2 [Homo sapiens]                  |
|                 |                                                                                                                                                                                                                                                     |                                                   |              |                                                          |                     | <i>Mput-PRDM16</i>  | ENSMMPUP00000007423 | SET + 6 Zn-F                                                          | 3/16  | NP_071397 PR domain zinc finger protein 16 isoform 1 [Homo sapiens]                     |
|                 |                                                                                                                                                                                                                                                     |                                                   |              |                                                          |                     | <i>Mput-PRDM17</i>  | ENSMMPUP00000005449 | 6 Zn-F                                                                | 17    | NP_079017 zinc finger protein 408 isoform 1 [Homo sapiens]                              |

**Table S6: Prdm genes in vertebrates.**

| Taxa                 | Species                                                                                                                                                                                                                     | Source of the used sequences / Sequencing centers | # PRDM genes                                     | Genes                                                                                   | Accession proteins  | Domains                                                                                                                                                                                                             | PRDM family  | Best Blast Hit Human                 |                                                                                |                    |                    |              |   |                                                                    |
|----------------------|-----------------------------------------------------------------------------------------------------------------------------------------------------------------------------------------------------------------------------|---------------------------------------------------|--------------------------------------------------|-----------------------------------------------------------------------------------------|---------------------|---------------------------------------------------------------------------------------------------------------------------------------------------------------------------------------------------------------------|--------------|--------------------------------------|--------------------------------------------------------------------------------|--------------------|--------------------|--------------|---|--------------------------------------------------------------------|
| Mammalia             | <i>Craniata, Vertebrata, Gnathostomata, Teleostomi Euteleostomi; Sarcopterygii; Dipnotetrapodomorpha; Tetrapoda; Amniota; Mammalia; Theria; Eutheria; Laurasiatheria; Carnivora; Canifomia; Canidae; Canis; Canis lupus</i> | Dog                                               | Ensembl / The Broad Institute of Harvard and MIT | 15                                                                                      | <i>Clup-PRDM1</i>   | ENSCAFP00000005506                                                                                                                                                                                                  | SET + 4 Zn-F | 1                                    | NP_001189 PR domain zinc finger protein 1 isoform 1 [Homo sapiens]             |                    |                    |              |   |                                                                    |
|                      |                                                                                                                                                                                                                             |                                                   |                                                  |                                                                                         | <i>Clup-PRDM2</i>   | ENSCAFP00000024082                                                                                                                                                                                                  | -            | 2                                    | NP_036363 PR domain zinc finger protein 2 isoform a [Homo sapiens]             |                    |                    |              |   |                                                                    |
|                      |                                                                                                                                                                                                                             |                                                   |                                                  |                                                                                         | <i>Clup-PRDM3</i>   | ENSCAFP000000021589                                                                                                                                                                                                 | SET + 3 Zn-F | 3/16                                 | NP_001098547 MDS1 and EVI1 complex locus protein EVI1 isoform a [Homo sapiens] |                    |                    |              |   |                                                                    |
|                      |                                                                                                                                                                                                                             |                                                   |                                                  |                                                                                         | <i>Clup-PRDM4</i>   | ENSCAFP00000040587                                                                                                                                                                                                  | SET + 3 Zn-F | 4                                    | NP_036538 PR domain zinc finger protein 4 [Homo sapiens]                       |                    |                    |              |   |                                                                    |
|                      |                                                                                                                                                                                                                             |                                                   |                                                  |                                                                                         | <i>Clup-PRDM5</i>   | ENSCAFP00000006212                                                                                                                                                                                                  | 2 Zn-F       | 5                                    | NP_061169 PR domain zinc finger protein 5 [Homo sapiens]                       |                    |                    |              |   |                                                                    |
|                      |                                                                                                                                                                                                                             |                                                   |                                                  |                                                                                         | <i>Clup-PRDM6</i>   | ENSCAFP00000031903                                                                                                                                                                                                  | SET + 2 Zn-F | 6                                    | NP_001129711 putative histone-lysine N-methyltransferase PRDM6 [Homo sapiens]  |                    |                    |              |   |                                                                    |
|                      |                                                                                                                                                                                                                             |                                                   |                                                  |                                                                                         | <i>Clup-PRDM8</i>   | ENSCAFP00000013038                                                                                                                                                                                                  | SET + 1 Zn-F | 8                                    | NP_001092873 PR domain zinc finger protein 8 [Homo sapiens]                    |                    |                    |              |   |                                                                    |
|                      |                                                                                                                                                                                                                             |                                                   |                                                  |                                                                                         | <i>Clup-PRDM10</i>  | ENSCAFP00000041652                                                                                                                                                                                                  | SET          | 10/15                                | NP_955469 PR domain zinc finger protein 10 isoform 2 [Homo sapiens]            |                    |                    |              |   |                                                                    |
|                      |                                                                                                                                                                                                                             |                                                   |                                                  |                                                                                         | <i>Clup-PRDM11</i>  | ENSCAFP00000013839                                                                                                                                                                                                  | SET          | 11                                   | NP_001243625 PR domain-containing protein 11 isoform 2 [Homo sapiens]          |                    |                    |              |   |                                                                    |
|                      |                                                                                                                                                                                                                             |                                                   |                                                  |                                                                                         | <i>Clup-PRDM12</i>  | ENSCAFP00000030461                                                                                                                                                                                                  | SET + 3 Zn-F | 12                                   | NP_067632 PR domain zinc finger protein 12 [Homo sapiens]                      |                    |                    |              |   |                                                                    |
|                      |                                                                                                                                                                                                                             |                                                   |                                                  |                                                                                         | <i>Clup-PRDM13</i>  | ENSCAFP00000031095                                                                                                                                                                                                  | SET + 2 Zn-F | 13                                   | NP_067633 PR domain zinc finger protein 13 [Homo sapiens]                      |                    |                    |              |   |                                                                    |
|                      |                                                                                                                                                                                                                             |                                                   |                                                  |                                                                                         | <i>Clup-PRDM14</i>  | ENSCAFP00000036507                                                                                                                                                                                                  | SET + 3 Zn-F | 14                                   | NP_078780 PR domain zinc finger protein 14 [Homo sapiens]                      |                    |                    |              |   |                                                                    |
|                      |                                                                                                                                                                                                                             |                                                   |                                                  |                                                                                         | <i>Clup-PRDM15</i>  | ENSCAFP00000015009                                                                                                                                                                                                  | SET + 3 Zn-F | 10/15                                | NP_071398 PR domain zinc finger protein 15 isoform 1 [Homo sapiens]            |                    |                    |              |   |                                                                    |
|                      |                                                                                                                                                                                                                             |                                                   |                                                  |                                                                                         | <i>Clup-PRDM16</i>  | ENSCAFP00000028796                                                                                                                                                                                                  | SET + 7 Zn-F | 3/16                                 | NP_071397 PR domain zinc finger protein 16 isoform 1 [Homo sapiens]            |                    |                    |              |   |                                                                    |
|                      |                                                                                                                                                                                                                             |                                                   |                                                  |                                                                                         | <i>Clup-PRDM17</i>  | ENSCAFP00000013443                                                                                                                                                                                                  | 6 Zn-F       | 17                                   | NP_079017 zinc finger protein 408 isoform 1 [Homo sapiens]                     |                    |                    |              |   |                                                                    |
|                      |                                                                                                                                                                                                                             |                                                   |                                                  |                                                                                         | Mammalia            | <i>Craniata, Vertebrata, Gnathostomata, Teleostomi Euteleostomi; Sarcopterygii; Dipnotetrapodomorpha; Tetrapoda; Amniota; Mammalia; Theria; Eutheria; Laurasiatheria; Carnivora; Canifomia; Ursidae; Ailuropoda</i> | Panda        | Ensembl / Beijing Genomics Institute | 16                                                                             | <i>Amela-PRDM1</i> | ENSAMEP00000001570 | 6 Zn-F       | 1 | NP_001189 PR domain zinc finger protein 1 isoform 1 [Homo sapiens] |
|                      |                                                                                                                                                                                                                             |                                                   |                                                  |                                                                                         |                     |                                                                                                                                                                                                                     |              |                                      |                                                                                | <i>Amela-PRDM2</i> | ENSAMEP00000007067 | -            | 2 | NP_036363 PR domain zinc finger protein 2 isoform a [Homo sapiens] |
| <i>Amela-PRDM3</i>   | ENSAMEP00000002205                                                                                                                                                                                                          | SET + 4 Zn-F                                      | 3/16                                             | NP_001098547 MDS1 and EVI1 complex locus protein EVI1 isoform a [Homo sapiens]          |                     |                                                                                                                                                                                                                     |              |                                      |                                                                                |                    |                    |              |   |                                                                    |
| <i>Amela-PRDM4</i>   | ENSAMEP00000017084                                                                                                                                                                                                          | SET + 3 Zn-F                                      | 4                                                | NP_036538 PR domain zinc finger protein 4 [Homo sapiens]                                |                     |                                                                                                                                                                                                                     |              |                                      |                                                                                |                    |                    |              |   |                                                                    |
| <i>Amela-PRDM5</i>   | ENSAMEP00000003221                                                                                                                                                                                                          | 2 Zn-F                                            | 5                                                | NP_061169 PR domain zinc finger protein 5 [Homo sapiens]                                |                     |                                                                                                                                                                                                                     |              |                                      |                                                                                |                    |                    |              |   |                                                                    |
| <i>Amela-PRDM6</i>   | ENSAMEP00000016566                                                                                                                                                                                                          | SET + 2 Zn-F                                      | 6                                                | NP_001129711 putative histone-lysine N-methyltransferase PRDM6 [Homo sapiens]           |                     |                                                                                                                                                                                                                     |              |                                      |                                                                                |                    |                    |              |   |                                                                    |
| <i>Amela-PRDM7/9</i> | ENSAMEP00000001535                                                                                                                                                                                                          | SET                                               | 7/9                                              | NP_001091643 probable histone-lysine N-methyltransferase PRDM7 isoform 1 [Homo sapiens] |                     |                                                                                                                                                                                                                     |              |                                      |                                                                                |                    |                    |              |   |                                                                    |
| <i>Amela-PRDM8</i>   | ENSAMEP00000005538                                                                                                                                                                                                          | SET                                               | 8                                                | NP_001092873 PR domain zinc finger protein 8 [Homo sapiens]                             |                     |                                                                                                                                                                                                                     |              |                                      |                                                                                |                    |                    |              |   |                                                                    |
| <i>Amela-PRDM10</i>  | ENSAMEP00000002557                                                                                                                                                                                                          | SET                                               | 10/15                                            | NP_955469 PR domain zinc finger protein 10 isoform 2 [Homo sapiens]                     |                     |                                                                                                                                                                                                                     |              |                                      |                                                                                |                    |                    |              |   |                                                                    |
| <i>Amela-PRDM11</i>  | ENSAMEP00000000776                                                                                                                                                                                                          | SET                                               | 11                                               | NP_001243625 PR domain-containing protein 11 isoform 2 [Homo sapiens]                   |                     |                                                                                                                                                                                                                     |              |                                      |                                                                                |                    |                    |              |   |                                                                    |
| <i>Amela-PRDM12</i>  | ENSAMEP00000017138                                                                                                                                                                                                          | SET + 2 Zn-F                                      | 12                                               | NP_067632 PR domain zinc finger protein 12 [Homo sapiens]                               |                     |                                                                                                                                                                                                                     |              |                                      |                                                                                |                    |                    |              |   |                                                                    |
| <i>Amela-PRDM13</i>  | ENSAMEP00000009412                                                                                                                                                                                                          | SET + 3 Zn-F                                      | 13                                               | NP_067633 PR domain zinc finger protein 13 [Homo sapiens]                               |                     |                                                                                                                                                                                                                     |              |                                      |                                                                                |                    |                    |              |   |                                                                    |
| <i>Amela-PRDM14</i>  | ENSAMEP00000006554                                                                                                                                                                                                          | SET + 2 Zn-F                                      | 14                                               | NP_078780 PR domain zinc finger protein 14 [Homo sapiens]                               |                     |                                                                                                                                                                                                                     |              |                                      |                                                                                |                    |                    |              |   |                                                                    |
| <i>Amela-PRDM15</i>  | ENSAMEP00000002303                                                                                                                                                                                                          | SET + 2 Zn-F                                      | 10/15                                            | NP_071398 PR domain zinc finger protein 15 isoform 1 [Homo sapiens]                     |                     |                                                                                                                                                                                                                     |              |                                      |                                                                                |                    |                    |              |   |                                                                    |
| <i>Amela-PRDM16</i>  | ENSAMEP00000009899                                                                                                                                                                                                          | SET + 7 Zn-F                                      | 3/16                                             | NP_071397 PR domain zinc finger protein 16 isoform 1 [Homo sapiens]                     |                     |                                                                                                                                                                                                                     |              |                                      |                                                                                |                    |                    |              |   |                                                                    |
| <i>Amela-PRDM17</i>  | ENSAMEP00000007271                                                                                                                                                                                                          | 6 Zn-F                                            | 17                                               | NP_079017 zinc finger protein 408 isoform 1 [Homo sapiens]                              |                     |                                                                                                                                                                                                                     |              |                                      |                                                                                |                    |                    |              |   |                                                                    |
| Mammalia             | <i>Craniata, Vertebrata; Gnathostomata; Teleostomi; Euteleostomi; Sarcopterygii; Dipnotetrapodomorpha; Tetrapoda; Amniota; Mammalia; Theria; Metatheria; Didelphimorphia; Didelphidae; Didelphinae; Monodelphis</i>         | Opossum                                           | Ensembl / The Broad Institute of Harvard and MIT | 15                                                                                      |                     |                                                                                                                                                                                                                     |              |                                      |                                                                                | <i>Mdom-PRDM1</i>  | ENSMODP00000022480 | SET + 5 Zn-F | 1 | NP_001189 PR domain zinc finger protein 1 isoform 1 [Homo sapiens] |
|                      |                                                                                                                                                                                                                             |                                                   |                                                  |                                                                                         | <i>Mdom-PRDM2</i>   | ENSMODP000000035055                                                                                                                                                                                                 | SET + 1 Zn-F | 2                                    | NP_036363 PR domain zinc finger protein 2 isoform a [Homo sapiens]             |                    |                    |              |   |                                                                    |
|                      |                                                                                                                                                                                                                             |                                                   |                                                  |                                                                                         | <i>Mdom-PRDM3</i>   | ENSMODP000000034995                                                                                                                                                                                                 | 3 Zn-F       | 3/16                                 | NP_001192123 MDS1 and EVI1 complex locus protein EVI1 isoform b [Homo sapiens] |                    |                    |              |   |                                                                    |
|                      |                                                                                                                                                                                                                             |                                                   |                                                  |                                                                                         | <i>Mdom-PRDM4</i>   | ENSMODP00000001757                                                                                                                                                                                                  | SET + 4 Zn-F | 4                                    | NP_036538 PR domain zinc finger protein 4 [Homo sapiens]                       |                    |                    |              |   |                                                                    |
|                      |                                                                                                                                                                                                                             |                                                   |                                                  |                                                                                         | <i>Mdom-PRDM5</i>   | ENSMODP00000023632                                                                                                                                                                                                  | SET + 4 Zn-F | 5                                    | NP_061169 PR domain zinc finger protein 5 [Homo sapiens]                       |                    |                    |              |   |                                                                    |
|                      |                                                                                                                                                                                                                             |                                                   |                                                  |                                                                                         | <i>Mdom-PRDM6</i>   | ENSMODP000000016775                                                                                                                                                                                                 | SET + 2 Zn-F | 6                                    | NP_001129711 putative histone-lysine N-methyltransferase PRDM6 [Homo sapiens]  |                    |                    |              |   |                                                                    |
|                      |                                                                                                                                                                                                                             |                                                   |                                                  |                                                                                         | <i>Mdom-PRDM7/9</i> | ENSMODP000000031611                                                                                                                                                                                                 | SET          | 7/9                                  | NP_064612 histone-lysine N-methyltransferase PRDM9 [Homo sapiens]              |                    |                    |              |   |                                                                    |

**Table S6: Prdm genes in vertebrates.**

| Taxa              | Species                                                                                                                                                                                               | Source of the used sequences / Sequencing centers | # PRDM genes    | Genes                                                   | Accession proteins | Domains             | PRDM family                                                     | Best Blast Hit Human                                                   |       |                                                                                |
|-------------------|-------------------------------------------------------------------------------------------------------------------------------------------------------------------------------------------------------|---------------------------------------------------|-----------------|---------------------------------------------------------|--------------------|---------------------|-----------------------------------------------------------------|------------------------------------------------------------------------|-------|--------------------------------------------------------------------------------|
|                   |                                                                                                                                                                                                       |                                                   |                 | <i>Mdom-PRDM8</i>                                       | ENSMODP00000026004 | SET + 1 Zn-F        | 8                                                               | NP_001092873 PR domain zinc finger protein 8 [Homo sapiens]            |       |                                                                                |
|                   |                                                                                                                                                                                                       |                                                   |                 | <i>Mdom-PRDM10</i>                                      | ENSMODP00000006132 | -                   | 10/15                                                           | NP_064613 PR domain zinc finger protein 10 isoform 1 [Homo sapiens]    |       |                                                                                |
|                   |                                                                                                                                                                                                       |                                                   |                 | <i>Mdom-PRDM11</i>                                      | ENSMODP00000024799 | SET                 | 11                                                              | NP_001243624 PR domain-containing protein 11 isoform 1 [Homo sapiens]  |       |                                                                                |
|                   |                                                                                                                                                                                                       |                                                   |                 | <i>Mdom-PRDM12</i>                                      | ENSMODP00000015165 | SET + 3 Zn-F        | 12                                                              | NP_067632 PR domain zinc finger protein 12 [Homo sapiens]              |       |                                                                                |
|                   |                                                                                                                                                                                                       |                                                   |                 | <i>Mdom-PRDM13</i>                                      | ENSMODP00000022552 | SET + 1 Zn-F        | 13                                                              | NP_067633 PR domain zinc finger protein 13 [Homo sapiens]              |       |                                                                                |
|                   |                                                                                                                                                                                                       |                                                   |                 | <i>Mdom-PRDM14</i>                                      | ENSMODP00000036437 | SET + 3 Zn-F        | 14                                                              | NP_078780 PR domain zinc finger protein 14 [Homo sapiens]              |       |                                                                                |
|                   |                                                                                                                                                                                                       |                                                   |                 | <i>Mdom-PRDM15</i>                                      | ENSMODP00000026214 | SET + 1 Zn-F        | 10/15                                                           | NP_001035514 PR domain zinc finger protein 15 isoform 2 [Homo sapiens] |       |                                                                                |
|                   |                                                                                                                                                                                                       |                                                   |                 | <i>Mdom-PRDM16</i>                                      | ENSMODP00000031211 | SET + 4 Zn-F        | 3/16                                                            | NP_071397 PR domain zinc finger protein 16 isoform 1 [Homo sapiens]    |       |                                                                                |
| <b>Mammalia</b>   | <i>Craniata; Vertebrata; Gnathostomata; Teleostomi; Euteleostomi; Sarcopterygii; Dipnotetrapodomorpha; Tetrapoda; Amniota; Mammalia; Theria; Metatheria; Dasyuromorpha; Dasyuridae; Sarcophilus</i>   | <i>Sarcophilus harrisii</i>                       | Tasmanian devil | Ensembl / Wellcome Trust Sanger Institute and Illumina  | 13                 | <i>Shar-PRDM1</i>   | ENSSHAP00000011740                                              | SET                                                                    | 1     | NP_001189 PR domain zinc finger protein 1 isoform 1 [Homo sapiens]             |
|                   |                                                                                                                                                                                                       |                                                   |                 |                                                         |                    | <i>Shar-PRDM2</i>   | ENSSHAP00000017120                                              | SET + 5 Zn-F                                                           | 2     | NP_036363 PR domain zinc finger protein 2 isoform a [Homo sapiens]             |
|                   |                                                                                                                                                                                                       |                                                   |                 |                                                         |                    | <i>Shar-PRDM3</i>   | ENSSHAP00000020670                                              | 4 Zn-F                                                                 | 3/16  | NP_001157471 MDS1 and EVI1 complex locus protein EVI1 isoform d [Homo sapiens] |
|                   |                                                                                                                                                                                                       |                                                   |                 |                                                         |                    | <i>Shar-PRDM4</i>   | ENSSHAP00000019032                                              | -                                                                      | 4     | NP_036538 PR domain zinc finger protein 4 [Homo sapiens]                       |
|                   |                                                                                                                                                                                                       |                                                   |                 |                                                         |                    | <i>Shar-PRDM5</i>   | ENSSHAP0000003696                                               | 2 Zn-F                                                                 | 5     | NP_061169 PR domain zinc finger protein 5 [Homo sapiens]                       |
|                   |                                                                                                                                                                                                       |                                                   |                 |                                                         |                    | <i>Shar-PRDM6</i>   | ENSSHAP00000011079                                              | SET + 2 Zn-F                                                           | 6     | NP_001129711 putative histone-lysine N-methyltransferase PRDM6 [Homo sapiens]  |
|                   |                                                                                                                                                                                                       |                                                   |                 |                                                         |                    | <i>Shar-PRDM8</i>   | ENSSHAP00000021414                                              | SET + 1 Zn-F                                                           | 8     | NP_001092873 PR domain zinc finger protein 8 [Homo sapiens]                    |
|                   |                                                                                                                                                                                                       |                                                   |                 |                                                         |                    | <i>Shar-PRDM10</i>  | ENSSHAP00000005149                                              | SET + 1 Zn-F                                                           | 10/15 | NP_955469 PR domain zinc finger protein 10 isoform 2 [Homo sapiens]            |
|                   |                                                                                                                                                                                                       |                                                   |                 |                                                         |                    | <i>Shar-PRDM11</i>  | ENSSHAP00000011422                                              | SET                                                                    | 11    | NP_001243625 PR domain-containing protein 11 isoform 2 [Homo sapiens]          |
|                   |                                                                                                                                                                                                       |                                                   |                 |                                                         |                    | <i>Shar-PRDM12</i>  | ENSSHAP00000018820                                              | SET + 3 Zn-F                                                           | 12    | NP_067632 PR domain zinc finger protein 12 [Homo sapiens]                      |
|                   |                                                                                                                                                                                                       |                                                   |                 |                                                         |                    | <i>Shar-PRDM13</i>  | ENSSHAP00000015656                                              | SET + 1 Zn-F                                                           | 13    | NP_067633 PR domain zinc finger protein 13 [Homo sapiens]                      |
|                   |                                                                                                                                                                                                       |                                                   |                 |                                                         |                    | <i>Shar-PRDM14</i>  | ENSSHAP00000018236                                              | SET + 2 Zn-F                                                           | 14    | NP_078780 PR domain zinc finger protein 14 [Homo sapiens]                      |
|                   |                                                                                                                                                                                                       |                                                   |                 |                                                         |                    | <i>Shar-PRDM15</i>  | ENSSHAP00000003225                                              | 1 Zn-F                                                                 | 10/15 | NP_071398 PR domain zinc finger protein 15 isoform 1 [Homo sapiens]            |
| <b>Mammalia</b>   | <i>Craniata; Vertebrata; Gnathostomata; Teleostomi; Euteleostomi; Sarcopterygii; Dipnotetrapodomorpha; Tetrapoda; Amniota; Mammalia; Prototheria; Monotremata; Ornithorhynchidae; Ornithorhynchus</i> | <i>Ornithorhynchus anatinus</i>                   | Platypus        | Ensembl / The Genome Institute at Washington University | 14                 | <i>Oana-PRDM1</i>   | ENSOANP00000006627                                              | SET + 5 Zn-F                                                           | 1     | NP_001189 PR domain zinc finger protein 1 isoform 1 [Homo sapiens]             |
|                   |                                                                                                                                                                                                       |                                                   |                 |                                                         |                    | <i>Oana-PRDM2</i>   | ENSOANP00000015708                                              | -                                                                      | 2     | NP_056950 PR domain zinc finger protein 2 isoform b [Homo sapiens]             |
|                   |                                                                                                                                                                                                       |                                                   |                 |                                                         |                    | <i>Oana-PRDM3</i>   | ENSOANP00000012088                                              | SET + 4 Zn-F                                                           | 3/16  | NP_004982 MDS1 and EVI1 complex locus protein EVI1 isoform c [Homo sapiens]    |
|                   |                                                                                                                                                                                                       |                                                   |                 |                                                         |                    | <i>Oana-PRDM4</i>   | ENSOANP00000008775                                              | SET + 3 Zn-F                                                           | 4     | NP_036538 PR domain zinc finger protein 4 [Homo sapiens]                       |
|                   |                                                                                                                                                                                                       |                                                   |                 |                                                         |                    | <i>Oana-PRDM5</i>   | ENSOANP00000023793                                              | SET + 1 Zn-F                                                           | 5     | NP_061169 PR domain zinc finger protein 5 [Homo sapiens]                       |
|                   |                                                                                                                                                                                                       |                                                   |                 |                                                         |                    | <i>Oana-PRDM6</i>   | ENSOANP00000002432                                              | 2 Zn-F                                                                 | 6     | NP_001129711 putative histone-lysine N-methyltransferase PRDM6 [Homo sapiens]  |
|                   |                                                                                                                                                                                                       |                                                   |                 |                                                         |                    | <i>Oana-PRDM10</i>  | ENSOANP00000000911                                              | SET                                                                    | 10/15 | NP_955469 PR domain zinc finger protein 10 isoform 2 [Homo sapiens]            |
|                   |                                                                                                                                                                                                       |                                                   |                 |                                                         |                    | <i>Oana-PRDM11</i>  | ENSOANP00000015071                                              | SET                                                                    | 11    | NP_001243624 PR domain-containing protein 11 isoform 1 [Homo sapiens]          |
|                   |                                                                                                                                                                                                       |                                                   |                 |                                                         |                    | <i>Oana-PRDM12</i>  | ENSOANP00000001663                                              | SET + 2 Zn-F                                                           | 12    | NP_067632 PR domain zinc finger protein 12 [Homo sapiens]                      |
|                   |                                                                                                                                                                                                       |                                                   |                 |                                                         |                    | <i>Oana-PRDM15</i>  | ENSOANP00000010290                                              | SET + 2 Zn-F                                                           | 10/15 | NP_001035514 PR domain zinc finger protein 15 isoform 2 [Homo sapiens]         |
|                   |                                                                                                                                                                                                       |                                                   |                 |                                                         |                    | <i>Oana-PRDM7/9</i> | ENSOANP00000008625                                              | SET + 5 Zn-F                                                           | 7/9   | NP_064612 histone-lysine N-methyltransferase PRDM9 [Homo sapiens]              |
|                   |                                                                                                                                                                                                       |                                                   |                 |                                                         |                    | <i>Oana-PRDM8</i>   | ENSOANP00000005509                                              | SET                                                                    | 8     | NP_001092873 PR domain zinc finger protein 8 [Homo sapiens]                    |
|                   |                                                                                                                                                                                                       |                                                   |                 |                                                         |                    | <i>Oana-PRDM13</i>  | ENSOANP00000029175                                              | -                                                                      | 13    | NP_067633 PR domain zinc finger protein 13 [Homo sapiens]                      |
|                   |                                                                                                                                                                                                       |                                                   |                 |                                                         |                    | <i>Oana-PRDM14</i>  | ENSOANP00000028246                                              | 2 Zn-F                                                                 | 14    | NP_078780 PR domain zinc finger protein 14 [Homo sapiens]                      |
| <b>Sauropsida</b> | <i>Craniata, Vertebrata, Gnathostomata,</i>                                                                                                                                                           | <i>Anolis carolinensis</i>                        | Anole lizard    | Ensembl / The Broad Institute of Harvard                | 12                 | <i>Acar-PRDM1</i>   | XP_003215674.1  PREDICTED: PR domain zinc finger protein 1-like | SET + 4 Zn-F                                                           | 1     | NP_001189 PR domain zinc finger protein 1 isoform 1 [Homo sapiens]             |



**Table S6: Prdm genes in vertebrates.**

| Taxa                                                                                                                                                                                                                    | Species                                                                                                                                                                                                                                           | Source of the used sequences / Sequencing centers and MIT | # PRDM genes              | Genes               | Accession proteins                                                                                                                                                                                                                                                                                                                    | Domains           | PRDM family                                               | Best Blast Hit Human                                                           |                                                                    |
|-------------------------------------------------------------------------------------------------------------------------------------------------------------------------------------------------------------------------|---------------------------------------------------------------------------------------------------------------------------------------------------------------------------------------------------------------------------------------------------|-----------------------------------------------------------|---------------------------|---------------------|---------------------------------------------------------------------------------------------------------------------------------------------------------------------------------------------------------------------------------------------------------------------------------------------------------------------------------------|-------------------|-----------------------------------------------------------|--------------------------------------------------------------------------------|--------------------------------------------------------------------|
| Teleostomi Euteleostomi; Sarcopterygii; Dipnotetrapodomorpha; Tetrapoda; Amniota; Sauropsida; Sauria; Lepidosauria; Squamata; Bifurcata; Unidentata; Episquamata; Toxicofera; Iguania; Iguanidae; Polychrotinae; Anolis |                                                                                                                                                                                                                                                   |                                                           |                           | <i>Acar-PRDM3</i>   | XP_003218207.1  PREDICTED: MDS1 and EVI1 complex locus protein EVI1-like                                                                                                                                                                                                                                                              | SET + 2 Zn-F      | 3/16                                                      | NP_001098547 MDS1 and EVI1 complex locus protein EVI1 isoform a [Homo sapiens] |                                                                    |
|                                                                                                                                                                                                                         |                                                                                                                                                                                                                                                   |                                                           |                           | <i>Acar-PRDM4</i>   | XP_003220940.1  PREDICTED: PR domain zinc finger protein 4-like                                                                                                                                                                                                                                                                       | SET + 2 Zn-F      | 4                                                         | NP_036538 PR domain zinc finger protein 4 [Homo sapiens]                       |                                                                    |
|                                                                                                                                                                                                                         |                                                                                                                                                                                                                                                   |                                                           |                           | <i>Acar-PRDM5</i>   | XP_003221822.1  PREDICTED: PR domain zinc finger protein 5-like                                                                                                                                                                                                                                                                       | SET + 4 Zn-F      | 5                                                         | NP_061169 PR domain zinc finger protein 5 [Homo sapiens]                       |                                                                    |
|                                                                                                                                                                                                                         |                                                                                                                                                                                                                                                   |                                                           |                           | <i>Acar-PRDM6</i>   | XP_003223027.1  PREDICTED: putative histone-lysine N-methyltransferase PRDM6-like                                                                                                                                                                                                                                                     | SET + 2 Zn-F      | 6                                                         | NP_001129711 putative histone-lysine N-methyltransferase PRDM6 [Homo sapiens]  |                                                                    |
|                                                                                                                                                                                                                         |                                                                                                                                                                                                                                                   |                                                           |                           | <i>Acar-PRDM8</i>   | XP_003226938.1  PREDICTED: PR domain zinc finger protein 8-like                                                                                                                                                                                                                                                                       | SET + 1 Zn-F      | 8                                                         | NP_001092873 PR domain zinc finger protein 8 [Homo sapiens]                    |                                                                    |
|                                                                                                                                                                                                                         |                                                                                                                                                                                                                                                   |                                                           |                           | <i>Acar-PRDM10</i>  | XP_003223211.1  PREDICTED: PR domain zinc finger protein 10-like isoform 1                                                                                                                                                                                                                                                            | SET + 1 Zn-F      | 10/15                                                     | NP_955469 PR domain zinc finger protein 10 isoform 2 [Homo sapiens]            |                                                                    |
|                                                                                                                                                                                                                         |                                                                                                                                                                                                                                                   |                                                           |                           | <i>Acar-PRDM11</i>  | XP_003214687.1  PREDICTED: zinc finger protein 862-like                                                                                                                                                                                                                                                                               | SET               | 11                                                        | NP_001243625 PR domain-containing protein 11 isoform 2 [Homo sapiens]          |                                                                    |
|                                                                                                                                                                                                                         |                                                                                                                                                                                                                                                   |                                                           |                           | <i>Acar-PRDM14</i>  | XP_003219660.1  PREDICTED: PR domain zinc finger protein 14-like                                                                                                                                                                                                                                                                      | SET + 2 Zn-F      | 14                                                        | NP_078780 PR domain zinc finger protein 14 [Homo sapiens]                      |                                                                    |
|                                                                                                                                                                                                                         |                                                                                                                                                                                                                                                   |                                                           |                           | <i>Acar-PRDM15</i>  | XP_003219007.1  PREDICTED: PR domain zinc finger protein 15-like                                                                                                                                                                                                                                                                      | SET + 1 Zn-F      | 10/15                                                     | NP_071398 PR domain zinc finger protein 15 isoform 1 [Homo sapiens]            |                                                                    |
|                                                                                                                                                                                                                         |                                                                                                                                                                                                                                                   |                                                           |                           | <i>Acar-PRDM16</i>  | XP_003228409.1  PREDICTED: PR domain zinc finger protein 16-like, partial                                                                                                                                                                                                                                                             | 4 Zn-F            | 3/16                                                      | NP_071397 PR domain zinc finger protein 16 isoform 1 [Homo sapiens]            |                                                                    |
|                                                                                                                                                                                                                         |                                                                                                                                                                                                                                                   |                                                           |                           | <i>Acar-PRDM17</i>  | XP_003214663.1  PREDICTED: zinc finger protein 408-like                                                                                                                                                                                                                                                                               | 4 Zn-F            | 17                                                        | NP_079017 zinc finger protein 408 isoform 1 [Homo sapiens]                     |                                                                    |
| Sauropsida                                                                                                                                                                                                              | <i>Craniata, Vertebrata, Gnathostomata, Teleostomi Euteleostomi; Sarcopterygii; Dipnotetrapodomorpha; Tetrapoda; Amniota; Sauropsida; Sauria; Testudines + Archosauria group; Testudines; Cryptodira; Trionychoidae; Trionychidae; Pelodiscus</i> | Chinese soft-shelled turtle                               | Ensembl / RIKEN institute | 16                  | <i>Psin-DMRT1</i>                                                                                                                                                                                                                                                                                                                     | ENSPSP00000002732 | SET + 4 Zn-F                                              | 1                                                                              | NP_001189 PR domain zinc finger protein 1 isoform 1 [Homo sapiens] |
|                                                                                                                                                                                                                         |                                                                                                                                                                                                                                                   |                                                           |                           | <i>Psin-DMRT2</i>   | ENSPSP00000005800                                                                                                                                                                                                                                                                                                                     | -                 | 2                                                         | NP_036363 PR domain zinc finger protein 2 isoform a [Homo sapiens]             |                                                                    |
|                                                                                                                                                                                                                         |                                                                                                                                                                                                                                                   |                                                           |                           | <i>Psin-DMRT3</i>   | ENSPSP00000005311                                                                                                                                                                                                                                                                                                                     | 2 Zn-F            | 3/16                                                      | NP_004982 MDS1 and EVI1 complex locus protein EVI1 isoform c [Homo sapiens]    |                                                                    |
|                                                                                                                                                                                                                         |                                                                                                                                                                                                                                                   |                                                           |                           | <i>Psin-DMRT4</i>   | ENSPSP00000013424                                                                                                                                                                                                                                                                                                                     | SET + 2 Zn-F      | 4                                                         | NP_036538 PR domain zinc finger protein 4 [Homo sapiens]                       |                                                                    |
|                                                                                                                                                                                                                         |                                                                                                                                                                                                                                                   |                                                           |                           | <i>Psin-DMRT5</i>   | ENSPSP00000015205                                                                                                                                                                                                                                                                                                                     | SET + 4 Zn-F      | 5                                                         | NP_061169 PR domain zinc finger protein 5 [Homo sapiens]                       |                                                                    |
|                                                                                                                                                                                                                         |                                                                                                                                                                                                                                                   |                                                           |                           | <i>Psin-DMRT6</i>   | ENSPSP00000008417                                                                                                                                                                                                                                                                                                                     | SET + 2 Zn-F      | 6                                                         | NP_001129711 putative histone-lysine N-methyltransferase PRDM6 [Homo sapiens]  |                                                                    |
|                                                                                                                                                                                                                         |                                                                                                                                                                                                                                                   |                                                           |                           | <i>Psin-DMRT8</i>   | ENSPSP00000020061                                                                                                                                                                                                                                                                                                                     | SET               | 8                                                         | NP_001092873 PR domain zinc finger protein 8 [Homo sapiens]                    |                                                                    |
|                                                                                                                                                                                                                         |                                                                                                                                                                                                                                                   |                                                           |                           | <i>Psin-DMRT7/9</i> | ENSPSP00000002371                                                                                                                                                                                                                                                                                                                     | SET + 13 Zn-F     | 7/9                                                       | NP_064612 histone-lysine N-methyltransferase PRDM9 [Homo sapiens]              |                                                                    |
|                                                                                                                                                                                                                         |                                                                                                                                                                                                                                                   |                                                           |                           | <i>Psin-DMRT10</i>  | ENSPSP00000004634                                                                                                                                                                                                                                                                                                                     | SET + 1 Zn-F      | 10/15                                                     | NP_955469 PR domain zinc finger protein 10 isoform 2 [Homo sapiens]            |                                                                    |
|                                                                                                                                                                                                                         |                                                                                                                                                                                                                                                   |                                                           |                           | <i>Psin-DMRT11</i>  | ENSPSP00000014284                                                                                                                                                                                                                                                                                                                     | SET               | 11                                                        | NP_064614 PR domain-containing protein 11 [Homo sapiens]                       |                                                                    |
|                                                                                                                                                                                                                         |                                                                                                                                                                                                                                                   |                                                           |                           | <i>Psin-DMRT12</i>  | ENSPSP00000007299                                                                                                                                                                                                                                                                                                                     | SET + 2 Zn-F      | 12                                                        | NP_067632 PR domain zinc finger protein 12 [Homo sapiens]                      |                                                                    |
|                                                                                                                                                                                                                         |                                                                                                                                                                                                                                                   |                                                           |                           | <i>Psin-DMRT13</i>  | ENSPSP00000002623                                                                                                                                                                                                                                                                                                                     | SET + 1 Zn-F      | 13                                                        | NP_067633 PR domain zinc finger protein 13 [Homo sapiens]                      |                                                                    |
|                                                                                                                                                                                                                         |                                                                                                                                                                                                                                                   |                                                           |                           | <i>Psin-DMRT14</i>  | ENSPSP00000020200                                                                                                                                                                                                                                                                                                                     | 2 Zn-F            | 14                                                        | NP_078780 PR domain zinc finger protein 14 [Homo sapiens]                      |                                                                    |
|                                                                                                                                                                                                                         |                                                                                                                                                                                                                                                   |                                                           |                           | <i>Psin-DMRT15</i>  | ENSPSP00000007705                                                                                                                                                                                                                                                                                                                     | SET + 2 Zn-F      | 10/15                                                     | NP_001035514 PR domain zinc finger protein 15 isoform 2 [Homo sapiens]         |                                                                    |
|                                                                                                                                                                                                                         |                                                                                                                                                                                                                                                   |                                                           |                           | <i>Psin-DMRT16</i>  | ENSPSP00000004358                                                                                                                                                                                                                                                                                                                     | SET + 2 Zn-F      | 3/16                                                      | NP_071397 PR domain zinc finger protein 16 isoform 1 [Homo sapiens]            |                                                                    |
|                                                                                                                                                                                                                         |                                                                                                                                                                                                                                                   |                                                           |                           | <i>Psin-DMRT17</i>  | ENSPSP00000005285                                                                                                                                                                                                                                                                                                                     | 5 Zn-F            | 17                                                        | NP_001171680 zinc finger protein 408 isoform 2 [Homo sapiens]                  |                                                                    |
|                                                                                                                                                                                                                         |                                                                                                                                                                                                                                                   |                                                           |                           | Sauropsida          | <i>Craniata; Vertebrata; Gnathostomata; Teleostomi; Euteleostomi; Sarcopterygii; Dipnotetrapodomorpha; Tetrapoda; Amniota; Sauropsida; Sauria; Testudines + Archosauria group; Archosauria; Dinosauria; Saurischia; Theropoda; Coelurosauria; Aves; Neognathae; Passeriformes; Passeroidea; Estrildidae; Estrildinae; Taeniopygia</i> | Zebra finch       | Ensembl / Washington University Genome Sequencing Center. | 14                                                                             | <i>Tgut-PRDM1</i>                                                  |
| <i>Tgut-PRDM2</i>                                                                                                                                                                                                       | ENSTGUP00000002573                                                                                                                                                                                                                                | SET                                                       | 2                         |                     |                                                                                                                                                                                                                                                                                                                                       |                   |                                                           | NP_036363 PR domain zinc finger protein 2 isoform a [Homo sapiens]             |                                                                    |
| <i>Tgut-PRDM3</i>                                                                                                                                                                                                       | ENSTGUP00000011364                                                                                                                                                                                                                                | 2 Zn-F                                                    | 3/16                      |                     |                                                                                                                                                                                                                                                                                                                                       |                   |                                                           | NP_001098548 MDS1 and EVI1 complex locus protein EVI1 isoform b [Homo sapiens] |                                                                    |
| <i>Tgut-PRDM4</i>                                                                                                                                                                                                       | ENSTGUP00000011301                                                                                                                                                                                                                                | SET + 3 Zn-F                                              | 4                         |                     |                                                                                                                                                                                                                                                                                                                                       |                   |                                                           | NP_036538 PR domain zinc finger protein 4 [Homo sapiens]                       |                                                                    |
| <i>Tgut-PRDM5</i>                                                                                                                                                                                                       | ENSTGUP00000001982                                                                                                                                                                                                                                | SET + 4 Zn-F                                              | 5                         |                     |                                                                                                                                                                                                                                                                                                                                       |                   |                                                           | NP_061169 PR domain zinc finger protein 5 [Homo sapiens]                       |                                                                    |
| <i>Tgut-PRDM6</i>                                                                                                                                                                                                       | ENSTGUP00000001146                                                                                                                                                                                                                                | SET + 1 Zn-F                                              | 6                         |                     |                                                                                                                                                                                                                                                                                                                                       |                   |                                                           | NP_001129711 putative histone-lysine N-methyltransferase PRDM6 [Homo sapiens]  |                                                                    |
| <i>Tgut-PRDM8</i>                                                                                                                                                                                                       | ENSTGUP00000001575                                                                                                                                                                                                                                | SET                                                       | 8                         |                     |                                                                                                                                                                                                                                                                                                                                       |                   |                                                           | NP_001092873 PR domain zinc finger protein 8 [Homo sapiens]                    |                                                                    |
| <i>Tgut-PRDM10</i>                                                                                                                                                                                                      | ENSTGUP00000000556                                                                                                                                                                                                                                | SET + 1 Zn-F                                              | 10/15                     |                     |                                                                                                                                                                                                                                                                                                                                       |                   |                                                           | NP_955469 PR domain zinc finger protein 10 isoform 2 [Homo sapiens]            |                                                                    |
| <i>Tgut-PRDM11</i>                                                                                                                                                                                                      | ENSTGUP00000010614                                                                                                                                                                                                                                | SET                                                       | 11                        |                     |                                                                                                                                                                                                                                                                                                                                       |                   |                                                           | NP_064614 PR domain-containing protein 11 [Homo sapiens]                       |                                                                    |

**Table S6: Prdm genes in vertebrates.**

| Taxa                     | Species                                                                                                                                                                                                                                                                                                    | Source of the used sequences / Sequencing centers | # PRDM genes        | Genes                                          | Accession proteins | Domains             | PRDM family                                                               | Best Blast Hit Human                                                   |       |                                                                                      |
|--------------------------|------------------------------------------------------------------------------------------------------------------------------------------------------------------------------------------------------------------------------------------------------------------------------------------------------------|---------------------------------------------------|---------------------|------------------------------------------------|--------------------|---------------------|---------------------------------------------------------------------------|------------------------------------------------------------------------|-------|--------------------------------------------------------------------------------------|
|                          |                                                                                                                                                                                                                                                                                                            |                                                   |                     | <i>Tgut-PRDM12</i>                             | ENSTGUP0000004826  | SET                 | 12                                                                        | NP_067632 PR domain zinc finger protein 12 [Homo sapiens]              |       |                                                                                      |
|                          |                                                                                                                                                                                                                                                                                                            |                                                   |                     | <i>Tgut-PRDM13</i>                             | ENSTGUP00000012643 | SET                 | 13                                                                        | NP_067633 PR domain zinc finger protein 13 [Homo sapiens]              |       |                                                                                      |
|                          |                                                                                                                                                                                                                                                                                                            |                                                   |                     | <i>Tgut-PRDM14</i>                             | ENSTGUP00000011805 | SET + 2 Zn-F        | 14                                                                        | NP_078780 PR domain zinc finger protein 14 [Homo sapiens]              |       |                                                                                      |
|                          |                                                                                                                                                                                                                                                                                                            |                                                   |                     | <i>Tgut-PRDM15</i>                             | ENSTGUP00000005639 | 2 Zn-F              | 10/15                                                                     | NP_001035514 PR domain zinc finger protein 15 isoform 2 [Homo sapiens] |       |                                                                                      |
|                          |                                                                                                                                                                                                                                                                                                            |                                                   |                     | <i>Tgut-PRDM16</i>                             | ENSTGUP00000002902 | SET + 1 Zn-F        | 3/16                                                                      | NP_071397 PR domain zinc finger protein 16 isoform 1 [Homo sapiens]    |       |                                                                                      |
| <b>Sauropsida</b>        | Craniata; Vertebrata; Gnathostomata; Teleostomi; Euteleostomi; Sarcopterygii; Dipnotetrapodomorpha; Tetrapoda; Amniota; Sauropsida; Sauria; Testudines + Archosauria group; Archosauria; Dinosauria; Saurischia; Theropoda; Coelurosauria; Aves; Neognathae; Galliformes; Phasianidae; Phasianinae; Gallus | <i>Gallus gallus</i>                              | Chicken             | NCBI / International Chicken Genome Consortium | 13                 | <i>Ggal-PRDM1</i>   | XP_003641086.1  PREDICTED: PR domain zinc finger protein 1                | SET + 4 Zn-F                                                           | 1     | NP_001189 sapiens] PR domain zinc finger protein 1 isoform 1 [Homo sapiens]          |
|                          |                                                                                                                                                                                                                                                                                                            |                                                   |                     |                                                |                    | <i>Ggal-PRDM2</i>   | XP_003642562.1  PREDICTED: PR domain zinc finger protein 2                | SET                                                                    | 2     | NP_056950 sapiens] PR domain zinc finger protein 2 isoform b [Homo sapiens]          |
|                          |                                                                                                                                                                                                                                                                                                            |                                                   |                     |                                                |                    | <i>Ggal-PRDM3</i>   | XP_422804.3  PREDICTED: MDS1 and EVI1 complex locus protein EVI1          | SET + 2 Zn-F                                                           | 3/16  | NP_004982 sapiens] MDS1 and EVI1 complex locus protein EVI1 isoform c [Homo sapiens] |
|                          |                                                                                                                                                                                                                                                                                                            |                                                   |                     |                                                |                    | <i>Ggal-PRDM4</i>   | XP_416301.3  PREDICTED: PR domain zinc finger protein 4                   | SET + 3 Zn-F                                                           | 4     | NP_036538 PR domain zinc finger protein 4 [Homo sapiens]                             |
|                          |                                                                                                                                                                                                                                                                                                            |                                                   |                     |                                                |                    | <i>Ggal-PRDM5</i>   | XP_420628.3  PREDICTED: PR domain zinc finger protein 5                   | SET + 4 Zn-F                                                           | 5     | NP_061169 PR domain zinc finger protein 5 [Homo sapiens]                             |
|                          |                                                                                                                                                                                                                                                                                                            |                                                   |                     |                                                |                    | <i>Ggal-PRDM6</i>   | XP_424413.3  PREDICTED: putative histone-lysine N-methyltransferase PRDM6 | SET + 2 Zn-F                                                           | 6     | NP_001129711 putative histone-lysine N-methyltransferase PRDM6 [Homo sapiens]        |
|                          |                                                                                                                                                                                                                                                                                                            |                                                   |                     |                                                |                    | <i>Ggal-PRDM8</i>   | XP_001236845.2  PREDICTED: PR domain zinc finger protein 8-like           | SET + 1 Zn-F                                                           | 8     | NP_001092873 PR domain zinc finger protein 8 [Homo sapiens]                          |
|                          |                                                                                                                                                                                                                                                                                                            |                                                   |                     |                                                |                    | <i>Ggal-PRDM10</i>  | XP_417870.3  PREDICTED: PR domain zinc finger protein 10                  | SET + 1 Zn-F                                                           | 10/15 | NP_064613 sapiens] PR domain zinc finger protein 10 isoform 1 [Homo sapiens]         |
|                          |                                                                                                                                                                                                                                                                                                            |                                                   |                     |                                                |                    | <i>Ggal-PRDM11</i>  | XP_421099.2  PREDICTED: zinc finger protein 862                           | SET                                                                    | 11    | NP_064614 PR domain-containing protein 11 [Homo sapiens]                             |
|                          |                                                                                                                                                                                                                                                                                                            |                                                   |                     |                                                |                    | <i>Ggal-PRDM12</i>  | XP_415465.2  PREDICTED: PR domain zinc finger protein 12                  | SET + 2 Zn-F                                                           | 12    | NP_067632 PR domain zinc finger protein 12 [Homo sapiens]                            |
|                          |                                                                                                                                                                                                                                                                                                            |                                                   |                     |                                                |                    | <i>Ggal-PRDM14</i>  | XP_003640888.1  PREDICTED: PR domain zinc finger protein 14-like          | SET + 2 Zn-F                                                           | 14    | NP_078780 PR domain zinc finger protein 14 [Homo sapiens]                            |
|                          |                                                                                                                                                                                                                                                                                                            |                                                   |                     |                                                |                    | <i>Ggal-PRDM15</i>  | XP_416740.3  PREDICTED: PR domain zinc finger protein 15                  | SET + 2 Zn-F                                                           | 10/15 | NP_001035514 PR domain zinc finger protein 15 isoform 2 [Homo sapiens]               |
|                          |                                                                                                                                                                                                                                                                                                            |                                                   |                     |                                                |                    | <i>Ggal-PRDM16</i>  | XP_417551.3  PREDICTED: PR domain zinc finger protein 16                  | SET + 2 Zn-F                                                           | 3/16  | NP_071397 sapiens] PR domain zinc finger protein 16 isoform 1 [Homo sapiens]         |
| <b>Amphibia</b>          | Craniata; Vertebrata; Gnathostomata; Teleostomi; Euteleostomi; Sarcopterygii; Dipnotetrapodomorpha; Tetrapoda; Amphibia; Batrachia; Anura; Pipoidea; Pipidae; Xenopodinae; Xenopus; Silurana                                                                                                               | <i>Xenopus (Silurana) tropicalis</i>              | Western clawed frog | Ensembl / Doe Joint Genome Institute           | 15                 | <i>Xiro-PRDM1</i>   | ENSXETP00000018988                                                        | SET + 4 Zn-F                                                           | 1     | NP_001189 sapiens] PR domain zinc finger protein 1 isoform 1 [Homo sapiens]          |
|                          |                                                                                                                                                                                                                                                                                                            |                                                   |                     |                                                |                    | <i>Xiro-PRDM2</i>   | ENSXETP000000029499                                                       | SET + 1 Zn-F                                                           | 2     | NP_036363 sapiens] PR domain zinc finger protein 2 isoform a [Homo sapiens]          |
|                          |                                                                                                                                                                                                                                                                                                            |                                                   |                     |                                                |                    | <i>Xiro-PRDM3</i>   | ENSXETP00000049401                                                        | 1 Zn-F                                                                 | 3/16  | NP_001098548 MDS1 and EVI1 complex locus protein EVI1 isoform b [Homo sapiens]       |
|                          |                                                                                                                                                                                                                                                                                                            |                                                   |                     |                                                |                    | <i>Xiro-PRDM4</i>   | ENSXETP00000025214                                                        | 1 Zn-F                                                                 | 4     | NP_036538 PR domain zinc finger protein 4 [Homo sapiens]                             |
|                          |                                                                                                                                                                                                                                                                                                            |                                                   |                     |                                                |                    | <i>Xiro-PRDM5</i>   | ENSXETP00000004492                                                        | SET + 4 Zn-F                                                           | 5     | NP_061169 PR domain zinc finger protein 5 [Homo sapiens]                             |
|                          |                                                                                                                                                                                                                                                                                                            |                                                   |                     |                                                |                    | <i>Xiro-PRDM6</i>   | ENSXETP00000022617                                                        | SET + 2 Zn-F                                                           | 6     | NP_001129711 putative histone-lysine N-methyltransferase PRDM6 [Homo sapiens]        |
|                          |                                                                                                                                                                                                                                                                                                            |                                                   |                     |                                                |                    | <i>Xiro-PRDM8</i>   | ENSXETP00000046540                                                        | SET + 1 Zn-F                                                           | 8     | NP_001092873 PR domain zinc finger protein 8 [Homo sapiens]                          |
|                          |                                                                                                                                                                                                                                                                                                            |                                                   |                     |                                                |                    | <i>Xiro-PRDM7/9</i> | ENSXETP00000005787                                                        | 7 Zn-F                                                                 | 7/9   | NP_064612 histone-lysine N-methyltransferase PRDM9 [Homo sapiens]                    |
|                          |                                                                                                                                                                                                                                                                                                            |                                                   |                     |                                                |                    | <i>Xiro-PRDM10</i>  | ENSXETP000000062917                                                       | SET + 1 Zn-F                                                           | 10/15 | NP_955469 sapiens] PR domain zinc finger protein 10 isoform 2 [Homo sapiens]         |
|                          |                                                                                                                                                                                                                                                                                                            |                                                   |                     |                                                |                    | <i>Xiro-PRDM12</i>  | ENSXETP00000002850                                                        | SET                                                                    | 12    | NP_067632 PR domain zinc finger protein 12 [Homo sapiens]                            |
|                          |                                                                                                                                                                                                                                                                                                            |                                                   |                     |                                                |                    | <i>Xiro-PRDM13</i>  | ENSXETP000000061235                                                       | SET + 1 Zn-F                                                           | 13    | NP_067633 PR domain zinc finger protein 13 [Homo sapiens]                            |
|                          |                                                                                                                                                                                                                                                                                                            |                                                   |                     |                                                |                    | <i>Xiro-PRDM14</i>  | ENSXETP000000034731                                                       | SET + 2 Zn-F                                                           | 14    | NP_078780 PR domain zinc finger protein 14 [Homo sapiens]                            |
|                          |                                                                                                                                                                                                                                                                                                            |                                                   |                     |                                                |                    | <i>Xiro-PRDM15</i>  | ENSXETP00000000120                                                        | 2 Zn-F                                                                 | 10/15 | NP_001035514 PR domain zinc finger protein 15 isoform 2 [Homo sapiens]               |
|                          |                                                                                                                                                                                                                                                                                                            |                                                   |                     |                                                |                    | <i>Xiro-PRDM16</i>  | ENSXETP000000026324                                                       | SET + 2 Zn-F                                                           | 3/16  | NP_071397 sapiens] PR domain zinc finger protein 16 isoform 1 [Homo sapiens]         |
|                          |                                                                                                                                                                                                                                                                                                            |                                                   |                     |                                                |                    | <i>Xiro-PRDM17</i>  | ENSXETP00000004234                                                        | 3 Zn-F                                                                 | 17    | NP_001171680 zinc finger protein 408 isoform 2 [Homo sapiens]                        |
| <b>Coelacanthimorpha</b> | Chordata; Craniata; Vertebrata;                                                                                                                                                                                                                                                                            | <i>Latimeria chalumnae</i>                        | Coelacanth          | Ensembl / The Broad Institute of Harvard       | 16                 | <i>Lcha-PRDM1a</i>  | ENSLACP00000019582                                                        | SET                                                                    | 1     | NP_001189 sapiens] PR domain zinc finger protein 1 isoform 1 [Homo sapiens]          |

**Table S6: Prdm genes in vertebrates.**

| Taxa                                                                                                                    | Species                                                                                                                                                                                                                               | Source of the used sequences / Sequencing centers | # PRDM genes | Genes                      | Accession proteins                                                                                                                                                                                                                    | Domains            | PRDM family                                                                              | Best Blast Hit Human                                                                            |       |                                                                               |                                                            |              |   |                                                                    |
|-------------------------------------------------------------------------------------------------------------------------|---------------------------------------------------------------------------------------------------------------------------------------------------------------------------------------------------------------------------------------|---------------------------------------------------|--------------|----------------------------|---------------------------------------------------------------------------------------------------------------------------------------------------------------------------------------------------------------------------------------|--------------------|------------------------------------------------------------------------------------------|-------------------------------------------------------------------------------------------------|-------|-------------------------------------------------------------------------------|------------------------------------------------------------|--------------|---|--------------------------------------------------------------------|
| Gnathostomata; Teleostomi; Euteleostomi; Sarcopterygii; Coelacanthimorpha; Coelacanthiformes; Coelacanthidae; Latimeria |                                                                                                                                                                                                                                       |                                                   |              | <i>Lcha-PRDM1b</i>         | ENSLACP00000022113                                                                                                                                                                                                                    | SET                | 1                                                                                        | NP_001189 PR domain zinc finger protein 1 isoform 1 [Homo sapiens]                              |       |                                                                               |                                                            |              |   |                                                                    |
|                                                                                                                         |                                                                                                                                                                                                                                       |                                                   |              | <i>Lcha-PRDM2</i>          | ENSLACP00000005070                                                                                                                                                                                                                    | SET + 1 Zn-F       | 2                                                                                        | NP_001007258 PR domain zinc finger protein 2 isoform c [Homo sapiens]                           |       |                                                                               |                                                            |              |   |                                                                    |
|                                                                                                                         |                                                                                                                                                                                                                                       |                                                   |              | <i>Lcha-PRDM3</i>          | ENSLACP00000019597                                                                                                                                                                                                                    | SET + 2 Zn-F       | 3/16                                                                                     | NP_004982 MDS1 and EVI1 complex locus protein EVI1 isoform c [Homo sapiens]                     |       |                                                                               |                                                            |              |   |                                                                    |
|                                                                                                                         |                                                                                                                                                                                                                                       |                                                   |              | <i>Lcha-PRDM4</i>          | ENSLACP00000008418                                                                                                                                                                                                                    | 2 Zn-F             | 4                                                                                        | NP_036538 PR domain zinc finger protein 4 [Homo sapiens]                                        |       |                                                                               |                                                            |              |   |                                                                    |
|                                                                                                                         |                                                                                                                                                                                                                                       |                                                   |              | <i>Lcha-PRDM5</i>          | ENSLACP00000010429                                                                                                                                                                                                                    | 4 Zn-F             | 5                                                                                        | NP_061169 PR domain zinc finger protein 5 [Homo sapiens]                                        |       |                                                                               |                                                            |              |   |                                                                    |
|                                                                                                                         |                                                                                                                                                                                                                                       |                                                   |              | <i>Lcha-PRDM6</i>          | ENSLACP00000003694                                                                                                                                                                                                                    | SET + 1 Zn-F       | 6                                                                                        | NP_001129711 putative histone-lysine N-methyltransferase PRDM6 [Homo sapiens]                   |       |                                                                               |                                                            |              |   |                                                                    |
|                                                                                                                         |                                                                                                                                                                                                                                       |                                                   |              | <i>Lcha-PRDM8</i>          | ENSLACP00000002086                                                                                                                                                                                                                    | SET + 1 Zn-F       | 8                                                                                        | NP_001092873 PR domain zinc finger protein 8 [Homo sapiens]                                     |       |                                                                               |                                                            |              |   |                                                                    |
|                                                                                                                         |                                                                                                                                                                                                                                       |                                                   |              | <i>Lcha-PRDM10</i>         | ENSLACP00000022508                                                                                                                                                                                                                    | SET                | 10/15                                                                                    | NP_955469 PR domain zinc finger protein 10 isoform 2 [Homo sapiens]                             |       |                                                                               |                                                            |              |   |                                                                    |
|                                                                                                                         |                                                                                                                                                                                                                                       |                                                   |              | <i>Lcha-PRDM11</i>         | ENSLACP00000020673                                                                                                                                                                                                                    | SET                | 11                                                                                       | NP_064614 PR domain-containing protein 11 [Homo sapiens]                                        |       |                                                                               |                                                            |              |   |                                                                    |
|                                                                                                                         |                                                                                                                                                                                                                                       |                                                   |              | <i>Lcha-PRDM12</i>         | ENSLACP00000019977                                                                                                                                                                                                                    | SET + 2 Zn-F       | 12                                                                                       | NP_067632 PR domain zinc finger protein 12 [Homo sapiens]                                       |       |                                                                               |                                                            |              |   |                                                                    |
|                                                                                                                         |                                                                                                                                                                                                                                       |                                                   |              | <i>Lcha-PRDM13</i>         | ENSLACP00000010000                                                                                                                                                                                                                    | SET + 1 Zn-F       | 13                                                                                       | NP_067633 PR domain zinc finger protein 13 [Homo sapiens]                                       |       |                                                                               |                                                            |              |   |                                                                    |
|                                                                                                                         |                                                                                                                                                                                                                                       |                                                   |              | <i>Lcha-PRDM14</i>         | ENSLACP00000005725                                                                                                                                                                                                                    | SET + 2 Zn-F       | 14                                                                                       | NP_078780 PR domain zinc finger protein 14 [Homo sapiens]                                       |       |                                                                               |                                                            |              |   |                                                                    |
|                                                                                                                         |                                                                                                                                                                                                                                       |                                                   |              | <i>Lcha-PRDM15</i>         | ENSLACP00000018399                                                                                                                                                                                                                    | 1 Zn-F             | 10/15                                                                                    | NP_001035514 PR domain zinc finger protein 15 isoform 2 [Homo sapiens]                          |       |                                                                               |                                                            |              |   |                                                                    |
|                                                                                                                         |                                                                                                                                                                                                                                       |                                                   |              | <i>Lcha-PRDM16</i>         | ENSLACP000000021648                                                                                                                                                                                                                   | SET + 1 Zn-F       | 3/16                                                                                     | XP_003120624 PREDICTED: PR domain zinc finger protein 16-like isoform 2, partial [Homo sapiens] |       |                                                                               |                                                            |              |   |                                                                    |
|                                                                                                                         |                                                                                                                                                                                                                                       |                                                   |              | <i>Lcha-PRDM17</i>         | ENSLACP000000021408                                                                                                                                                                                                                   | 3 Zn-F             | 17                                                                                       | NP_001171680 zinc finger protein 408 isoform 2 [Homo sapiens]                                   |       |                                                                               |                                                            |              |   |                                                                    |
|                                                                                                                         |                                                                                                                                                                                                                                       |                                                   |              | Teleostei                  | Craniata; Vertebrata; Gnathostomata; Teleostomi; Euteleostomi; Actinopterygii; Neopterygii; Teleostei; Elopoccephala; Clupeccephala; Otocephala; Ostariophysii; Otophysi; Cypriniphysi; Cypriniformes; Cyprinoidea; Cyprinidae; Danio | <i>Danio rerio</i> | Zebrafish                                                                                | NCBI / Sanger Institute                                                                         | 19    | <i>Dre-PRDM1b</i>                                                             | XP_002665829.1  PREDICTED: PR domain zinc finger protein 1 | SET + 3 Zn-F | 1 | NP_001189 PR domain zinc finger protein 1 isoform 1 [Homo sapiens] |
|                                                                                                                         |                                                                                                                                                                                                                                       |                                                   |              |                            |                                                                                                                                                                                                                                       |                    |                                                                                          |                                                                                                 |       | <i>Dre-PRDM1a</i>                                                             | NP_955809.2  PR domain zinc finger protein 1               | SET + 4 Zn-F | 1 | NP_001189 PR domain zinc finger protein 1 isoform 1 [Homo sapiens] |
|                                                                                                                         |                                                                                                                                                                                                                                       |                                                   |              |                            |                                                                                                                                                                                                                                       | <i>Dre-PRDM2a</i>  | XP_002663834.1  PREDICTED: PR domain zinc finger protein 2                               | SET                                                                                             | 2     | NP_056950 PR domain zinc finger protein 2 isoform b [Homo sapiens]            |                                                            |              |   |                                                                    |
|                                                                                                                         |                                                                                                                                                                                                                                       |                                                   |              |                            |                                                                                                                                                                                                                                       | <i>Dre-PRDM2b</i>  | XP_001343122.2  PREDICTED: PR domain zinc finger protein 2                               | -                                                                                               | 2     | NP_001007258 PR domain zinc finger protein 2 isoform c [Homo sapiens]         |                                                            |              |   |                                                                    |
|                                                                                                                         |                                                                                                                                                                                                                                       |                                                   |              |                            |                                                                                                                                                                                                                                       | <i>Dre-PRDM3</i>   | XP_001920947.3  PREDICTED: LOW QUALITY PROTEIN: MDS1 and EVI1 complex locus protein EVI1 | 2 Zn-F                                                                                          | 3/16  | NP_001098548 MDS1 and EVI1 complex locus protein EVI1 b [Homo sapiens]        |                                                            |              |   |                                                                    |
|                                                                                                                         |                                                                                                                                                                                                                                       |                                                   |              |                            |                                                                                                                                                                                                                                       | <i>Dre-PRDM4</i>   | NP_001116215.1  PR domain zinc finger protein 4                                          | SET + 1 Zn-F                                                                                    | 4     | NP_036538 PR domain zinc finger protein 4 [Homo sapiens]                      |                                                            |              |   |                                                                    |
|                                                                                                                         |                                                                                                                                                                                                                                       |                                                   |              |                            |                                                                                                                                                                                                                                       | <i>Dre-PRDM5</i>   | NP_001002301.1  PR domain zinc finger protein 5                                          | SET + 4 Zn-F                                                                                    | 5     | NP_061169 PR domain zinc finger protein 5 [Homo sapiens]                      |                                                            |              |   |                                                                    |
|                                                                                                                         |                                                                                                                                                                                                                                       |                                                   |              |                            |                                                                                                                                                                                                                                       | <i>Dre-PRDM6</i>   | XP_003199079.1  PREDICTED: putative histone-lysine N-methyltransferase PRDM6             | SET                                                                                             | 6     | NP_001129711 putative histone-lysine N-methyltransferase PRDM6 [Homo sapiens] |                                                            |              |   |                                                                    |
|                                                                                                                         |                                                                                                                                                                                                                                       |                                                   |              |                            |                                                                                                                                                                                                                                       | <i>Dre-PRDM8a</i>  | NP_001098575.1  PR domain zinc finger protein 8                                          | SET + 1 Zn-F                                                                                    | 8     | NP_001092873 PR domain zinc finger protein 8 [Homo sapiens]                   |                                                            |              |   |                                                                    |
|                                                                                                                         |                                                                                                                                                                                                                                       |                                                   |              |                            |                                                                                                                                                                                                                                       | <i>Dre-PRDM8b</i>  | NP_998575.1  PR domain containing 8                                                      | SET                                                                                             | 8     | NP_001092873 PR domain zinc finger protein 8 [Homo sapiens]                   |                                                            |              |   |                                                                    |
|                                                                                                                         |                                                                                                                                                                                                                                       |                                                   |              |                            |                                                                                                                                                                                                                                       | <i>Dre-PRDM8c</i>  | XP_001343474.3  PREDICTED: PR domain zinc finger protein 8-like                          | SET                                                                                             | 8     | NP_001092873 PR domain zinc finger protein 8 [Homo sapiens]                   |                                                            |              |   |                                                                    |
|                                                                                                                         |                                                                                                                                                                                                                                       |                                                   |              |                            |                                                                                                                                                                                                                                       | <i>Dre-PRDM7/9</i> | NP_957196.1  histone-lysine N-methyltransferase PRDM9                                    | SET + 4 Zn-F                                                                                    | 7/9   | NP_064612 histone-lysine N-methyltransferase PRDM9 [Homo sapiens]             |                                                            |              |   |                                                                    |
|                                                                                                                         |                                                                                                                                                                                                                                       |                                                   |              |                            |                                                                                                                                                                                                                                       | <i>Dre-PRDM10</i>  | XP_003200534.1  PREDICTED: PR domain zinc finger protein 10                              | SET + 1 Zn-F                                                                                    | 10/15 | NP_955469 PR domain zinc finger protein 10 isoform 2 [Homo sapiens]           |                                                            |              |   |                                                                    |
|                                                                                                                         |                                                                                                                                                                                                                                       |                                                   |              |                            |                                                                                                                                                                                                                                       | <i>Dre-PRDM11</i>  | XP_693848.3  PREDICTED: zinc finger protein 862                                          | SET                                                                                             | 11    | NP_064614 PR domain-containing protein 11 [Homo sapiens]                      |                                                            |              |   |                                                                    |
|                                                                                                                         |                                                                                                                                                                                                                                       |                                                   |              |                            |                                                                                                                                                                                                                                       | <i>Dre-PRDM12</i>  | NP_001007458.1  PR domain zinc finger protein 12                                         | SET + 2 Zn-F                                                                                    | 12    | NP_067632 PR domain zinc finger protein 12 [Homo sapiens]                     |                                                            |              |   |                                                                    |
|                                                                                                                         |                                                                                                                                                                                                                                       |                                                   |              |                            |                                                                                                                                                                                                                                       | <i>Dre-PRDM13</i>  | XP_001336591.2  PREDICTED: hypothetical protein LOC796276                                | SET + 1 Zn-F                                                                                    | 13    | NP_067633 PR domain zinc finger protein 13 [Homo sapiens]                     |                                                            |              |   |                                                                    |
|                                                                                                                         |                                                                                                                                                                                                                                       |                                                   |              |                            |                                                                                                                                                                                                                                       | <i>Dre-PRDM14</i>  | NP_001157303.1  PR domain zinc finger protein 14                                         | SET + 2 Zn-F                                                                                    | 14    | NP_078780 PR domain zinc finger protein 14 [Homo sapiens]                     |                                                            |              |   |                                                                    |
|                                                                                                                         |                                                                                                                                                                                                                                       |                                                   |              |                            |                                                                                                                                                                                                                                       | <i>Dre-PRDM16</i>  | XP_001922927.3  PREDICTED: PR domain zinc finger protein                                 | 2 Zn-F                                                                                          | 3/16  | NP_071397 PR domain zinc finger protein 16 isoform 1 [Homo sapiens]           |                                                            |              |   |                                                                    |
|                                                                                                                         |                                                                                                                                                                                                                                       |                                                   |              |                            |                                                                                                                                                                                                                                       | <i>Dre-PRDM17</i>  | XP_001333167.1  PREDICTED: zinc finger protein 408-like                                  | 5 Zn-F                                                                                          | 17    | NP_079017 zinc finger protein 408 isoform 1 [Homo sapiens]                    |                                                            |              |   |                                                                    |
| Teleostei                                                                                                               | Craniata; Vertebrata; Gnathostomata; Teleostomi; Euteleostomi; Actinopterygii; Neopterygii; Teleostei; Elopoccephala; Clupeccephala; Otocephala; Ostariophysii; Otophysi; Cypriniphysi; Cypriniformes; Cyprinoidea; Cyprinidae; Danio | <i>Takifugu rubripes</i>                          | Fugu         | Ensembl / Sanger Institute | 19                                                                                                                                                                                                                                    | <i>Trub-PRDM1a</i> | ENSTRUP00000000947                                                                       | SET + 3 Zn-F                                                                                    | 1     | NP_001189 PR domain zinc finger protein 1 isoform 1 [Homo sapiens]            |                                                            |              |   |                                                                    |

**Table S6: Prdm genes in vertebrates.**

| Taxa                                                                                                                                                                                                                                                                                                                                                                             | Species                                                                                                                                                                                                                                                                                                                                                                             | Source of the used sequences / Sequencing centers | # PRDM genes             | Genes                                                                  | Accession proteins | Domains             | PRDM family        | Best Blast Hit Human                                                           |       |                                                                                |
|----------------------------------------------------------------------------------------------------------------------------------------------------------------------------------------------------------------------------------------------------------------------------------------------------------------------------------------------------------------------------------|-------------------------------------------------------------------------------------------------------------------------------------------------------------------------------------------------------------------------------------------------------------------------------------------------------------------------------------------------------------------------------------|---------------------------------------------------|--------------------------|------------------------------------------------------------------------|--------------------|---------------------|--------------------|--------------------------------------------------------------------------------|-------|--------------------------------------------------------------------------------|
| Gnathostomata; Teleostomi; Euteleostomi; Actinopterygii; Actinopteri; Neopterygii; Teleostei; Elopocephala; Cluipocephala; Euteleostei; Neognathi; Neoteleostei; Eurypterygii; Ctenosquamata; Acanthomorpha; Euacanthomorpha; Holacanthopterygii; Acanthopterygii; Euacanthopterygii; Percomorpha; Tetraodontiformes; Tetraodontoidei; Tetraodontoidea; Tetraodontidae; Takifugu |                                                                                                                                                                                                                                                                                                                                                                                     | International Rugu Genome Consortium              |                          | <i>Trub-PRDM1c</i>                                                     | ENSTRUP00000013557 | SET + 3 Zn-F        | 1                  | NP_001189 PR domain zinc finger protein 1 isoform 1 [Homo sapiens]             |       |                                                                                |
|                                                                                                                                                                                                                                                                                                                                                                                  |                                                                                                                                                                                                                                                                                                                                                                                     |                                                   |                          | <i>Trub-PRDM1b</i>                                                     | ENSTRUP00000019508 | SET + 3 Zn-F        | 1                  | NP_001189 PR domain zinc finger protein 1 isoform 1 [Homo sapiens]             |       |                                                                                |
|                                                                                                                                                                                                                                                                                                                                                                                  |                                                                                                                                                                                                                                                                                                                                                                                     |                                                   |                          | <i>Trub-PRDM2a</i>                                                     | ENSTRUP00000037073 | SET                 | 2                  | NP_001007258 PR domain zinc finger protein 2 isoform c [Homo sapiens]          |       |                                                                                |
|                                                                                                                                                                                                                                                                                                                                                                                  |                                                                                                                                                                                                                                                                                                                                                                                     |                                                   |                          | <i>Trub-PRDM2b</i>                                                     | ENSTRUP00000036979 | -                   | 2                  | NP_001007258 PR domain zinc finger protein 2 isoform c [Homo sapiens]          |       |                                                                                |
|                                                                                                                                                                                                                                                                                                                                                                                  |                                                                                                                                                                                                                                                                                                                                                                                     |                                                   |                          | <i>Trub-PRDM3</i>                                                      | ENSTRUP00000019908 | 1 Zn-F              | 3/16               | NP_001098548 MDS1 and EVI1 complex locus protein EVI1 isoform a [Homo sapiens] |       |                                                                                |
|                                                                                                                                                                                                                                                                                                                                                                                  |                                                                                                                                                                                                                                                                                                                                                                                     |                                                   |                          | <i>Trub-PRDM4</i>                                                      | ENSTRUP00000017108 | 1 Zn-F              | 4                  | NP_036538 PR domain zinc finger protein 4 [Homo sapiens]                       |       |                                                                                |
|                                                                                                                                                                                                                                                                                                                                                                                  |                                                                                                                                                                                                                                                                                                                                                                                     |                                                   |                          | <i>Trub-PRDM5</i>                                                      | ENSTRUP00000035409 | SET + 4 Zn-F        | 5                  | NP_061169 PR domain zinc finger protein 5 [Homo sapiens]                       |       |                                                                                |
|                                                                                                                                                                                                                                                                                                                                                                                  |                                                                                                                                                                                                                                                                                                                                                                                     |                                                   |                          | <i>Trub-PRDM6</i>                                                      | ENSTRUP00000029271 | SET + 2 Zn-F        | 6                  | NP_001129711 putative histone-lysine N-methyltransferase PRDM6 [Homo sapiens]  |       |                                                                                |
|                                                                                                                                                                                                                                                                                                                                                                                  |                                                                                                                                                                                                                                                                                                                                                                                     |                                                   |                          | <i>Trub-PRDM8</i>                                                      | ENSTRUP0000002356  | SET + 1 Zn-F        | 8                  | NP_001092873 PR domain zinc finger protein 8 [Homo sapiens]                    |       |                                                                                |
|                                                                                                                                                                                                                                                                                                                                                                                  |                                                                                                                                                                                                                                                                                                                                                                                     |                                                   |                          | <i>Trub-PRDM7/9</i>                                                    | ENSTRUP00000023424 | 4 Zn-F              | 7/9                | NP_064612 histone-lysine N-methyltransferase PRDM9 [Homo sapiens]              |       |                                                                                |
|                                                                                                                                                                                                                                                                                                                                                                                  |                                                                                                                                                                                                                                                                                                                                                                                     |                                                   |                          | <i>Trub-PRDM10</i>                                                     | ENSTRUP00000029110 | 1 Zn-F              | 10/15              | NP_064613 PR domain zinc finger protein 10 isoform 1 [Homo sapiens]            |       |                                                                                |
|                                                                                                                                                                                                                                                                                                                                                                                  |                                                                                                                                                                                                                                                                                                                                                                                     |                                                   |                          | <i>Trub-PRDM12a</i>                                                    | ENSTRUP00000047797 | SET + 2 Zn-F        | 12                 | NP_067632 PR domain zinc finger protein 12 [Homo sapiens]                      |       |                                                                                |
|                                                                                                                                                                                                                                                                                                                                                                                  |                                                                                                                                                                                                                                                                                                                                                                                     |                                                   |                          | <i>Trub-PRDM12b</i>                                                    | ENSTRUP00000033700 | SET + 2 Zn-F        | 12                 | NP_067632 PR domain zinc finger protein 12 [Homo sapiens]                      |       |                                                                                |
|                                                                                                                                                                                                                                                                                                                                                                                  |                                                                                                                                                                                                                                                                                                                                                                                     |                                                   |                          | <i>Trub-PRDM13</i>                                                     | ENSTRUP00000000761 | SET + 1 Zn-F        | 13                 | NP_067633 PR domain zinc finger protein 13 [Homo sapiens]                      |       |                                                                                |
|                                                                                                                                                                                                                                                                                                                                                                                  |                                                                                                                                                                                                                                                                                                                                                                                     |                                                   |                          | <i>Trub-PRDM14</i>                                                     | ENSTRUP00000029691 | SET + 2 Zn-F        | 14                 | NP_078780 PR domain zinc finger protein 14 [Homo sapiens]                      |       |                                                                                |
|                                                                                                                                                                                                                                                                                                                                                                                  |                                                                                                                                                                                                                                                                                                                                                                                     |                                                   |                          | <i>Trub-PRDM15</i>                                                     | ENSTRUP00000003342 | 2 Zn-F              | 10/15              | NP_001035514 PR domain zinc finger protein 15 isoform 2 [Homo sapiens]         |       |                                                                                |
|                                                                                                                                                                                                                                                                                                                                                                                  |                                                                                                                                                                                                                                                                                                                                                                                     |                                                   |                          | <i>Trub-PRDM16</i>                                                     | ENSTRUP00000037755 | SET + 2 Zn-F        | 3/16               | NP_071397 PR domain zinc finger protein 16 isoform 1 [Homo sapiens]            |       |                                                                                |
| <i>Trub-PRDM17</i>                                                                                                                                                                                                                                                                                                                                                               | ENSTRUP00000032924                                                                                                                                                                                                                                                                                                                                                                  | 3 Zn-F                                            | 17                       | NP_079017 zinc finger protein 408 isoform 1 [Homo sapiens]             |                    |                     |                    |                                                                                |       |                                                                                |
| Teleostei                                                                                                                                                                                                                                                                                                                                                                        | Craniata; Vertebrata; Gnathostomata; Teleostomi; Euteleostomi; Actinopterygii; Actinopteri; Neopterygii; Teleostei; Elopocephala; Cluipocephala; Euteleostei; Neognathi; Neoteleostei; Eurypterygii; Ctenosquamata; Acanthomorpha; Euacanthomorpha; Holacanthopterygii; Acanthopterygii; Euacanthopterygii; Percomorpha; Smegmamorpha; Gasterosteidae; Gasterosteus                 | <i>Gasterosteus aculeatus</i>                     | Three-spined stickleback | Ensembl / The Broad Institute of Harvard and MIT                       | 13                 | <i>Gacu-PRDM1a</i>  | ENSGACP00000002263 | 3 Zn-F                                                                         | 1     | NP_001189 PR domain zinc finger protein 1 isoform 1 [Homo sapiens]             |
|                                                                                                                                                                                                                                                                                                                                                                                  |                                                                                                                                                                                                                                                                                                                                                                                     |                                                   |                          |                                                                        |                    | <i>Gacu-PRDM1b</i>  | ENSGACP00000012338 | SET + 3 Zn-F                                                                   | 1     | NP_001189 PR domain zinc finger protein 1 isoform 1 [Homo sapiens]             |
|                                                                                                                                                                                                                                                                                                                                                                                  |                                                                                                                                                                                                                                                                                                                                                                                     |                                                   |                          |                                                                        |                    | <i>Gacu-PRDM1c</i>  | ENSGACP00000003553 | SET + 3 Zn-F                                                                   | 1     | NP_001189 PR domain zinc finger protein 1 isoform 1 [Homo sapiens]             |
|                                                                                                                                                                                                                                                                                                                                                                                  |                                                                                                                                                                                                                                                                                                                                                                                     |                                                   |                          |                                                                        |                    | <i>Gacu-PRDM2a</i>  | ENSGACP00000001573 | SET + 1 Zn-F                                                                   | 2     | NP_036363 PR domain zinc finger protein 2 isoform a [Homo sapiens]             |
|                                                                                                                                                                                                                                                                                                                                                                                  |                                                                                                                                                                                                                                                                                                                                                                                     |                                                   |                          |                                                                        |                    | <i>Gacu-PRDM3</i>   | ENSGACP00000009669 | 2 Zn-F                                                                         | 3/16  | NP_001098547 MDS1 and EVI1 complex locus protein EVI1 isoform a [Homo sapiens] |
|                                                                                                                                                                                                                                                                                                                                                                                  |                                                                                                                                                                                                                                                                                                                                                                                     |                                                   |                          |                                                                        |                    | <i>Gacu-PRDM4</i>   | ENSGACP00000025056 | SET + 2 Zn-F                                                                   | 4     | NP_036538 PR domain zinc finger protein 4 [Homo sapiens]                       |
|                                                                                                                                                                                                                                                                                                                                                                                  |                                                                                                                                                                                                                                                                                                                                                                                     |                                                   |                          |                                                                        |                    | <i>Gacu-PRDM8</i>   | ENSGACP00000009461 | SET                                                                            | 8     | NP_001092873 PR domain zinc finger protein 8 [Homo sapiens]                    |
|                                                                                                                                                                                                                                                                                                                                                                                  |                                                                                                                                                                                                                                                                                                                                                                                     |                                                   |                          |                                                                        |                    | <i>Gacu-PRDM10</i>  | ENSGACP00000016253 | SET                                                                            | 10/15 | NP_955469 PR domain zinc finger protein 10 isoform 2 [Homo sapiens]            |
|                                                                                                                                                                                                                                                                                                                                                                                  |                                                                                                                                                                                                                                                                                                                                                                                     |                                                   |                          |                                                                        |                    | <i>Gacu-PRDM12</i>  | ENSGACP00000022065 | SET + 2 Zn-F                                                                   | 12    | NP_067632 PR domain zinc finger protein 12 [Homo sapiens]                      |
|                                                                                                                                                                                                                                                                                                                                                                                  |                                                                                                                                                                                                                                                                                                                                                                                     |                                                   |                          |                                                                        |                    | <i>Gacu-PRDM13</i>  | ENSGACP00000006645 | SET + 1 Zn-F                                                                   | 13    | NP_067633 PR domain zinc finger protein 13 [Homo sapiens]                      |
|                                                                                                                                                                                                                                                                                                                                                                                  |                                                                                                                                                                                                                                                                                                                                                                                     |                                                   |                          |                                                                        |                    | <i>Gacu-PRDM14</i>  | ENSGACP00000003704 | SET + 2 Zn-F                                                                   | 14    | NP_078780 PR domain zinc finger protein 14 [Homo sapiens]                      |
| <i>Gacu-PRDM15</i>                                                                                                                                                                                                                                                                                                                                                               | ENSGACP00000026688                                                                                                                                                                                                                                                                                                                                                                  | 1 Zn-F                                            | 10/15                    | NP_001035514 PR domain zinc finger protein 15 isoform 2 [Homo sapiens] |                    |                     |                    |                                                                                |       |                                                                                |
| <i>Gacu-PRDM16</i>                                                                                                                                                                                                                                                                                                                                                               | ENSGACP00000008736                                                                                                                                                                                                                                                                                                                                                                  | SET + 2 Zn-F                                      | 3/16                     | NP_071397 PR domain zinc finger protein 16 isoform 1 [Homo sapiens]    |                    |                     |                    |                                                                                |       |                                                                                |
| Teleostei                                                                                                                                                                                                                                                                                                                                                                        | Craniata; Vertebrata; Gnathostomata; Teleostomi; Euteleostomi; Actinopterygii; Actinopteri; Neopterygii; Teleostei; Elopocephala; Cluipocephala; Euteleostei; Neognathi; Neoteleostei; Eurypterygii; Ctenosquamata; Acanthomorpha; Euacanthomorpha; Holacanthopterygii; Acanthopterygii; Euacanthopterygii; Percomorpha; Smegmamorpha; Atherinomorpha; Beloniformes; Belontiiformes | <i>Oryzias latipes</i>                            | Medaka                   | Ensembl / National Institute of Genetics and the University of Tokyo   | 19                 | <i>Olat-PRDM1b</i>  | ENSORLP00000016227 | SET + 3 Zn-F                                                                   | 1     | NP_001189 PR domain zinc finger protein 1 isoform 1 [Homo sapiens]             |
|                                                                                                                                                                                                                                                                                                                                                                                  |                                                                                                                                                                                                                                                                                                                                                                                     |                                                   |                          |                                                                        |                    | <i>Olat-PRDM1a</i>  | ENSORLP00000019640 | 3 Zn-F                                                                         | 1     | NP_001189 PR domain zinc finger protein 1 isoform 1 [Homo sapiens]             |
|                                                                                                                                                                                                                                                                                                                                                                                  |                                                                                                                                                                                                                                                                                                                                                                                     |                                                   |                          |                                                                        |                    | <i>Olat-PRDM1c</i>  | ENSORLP00000012576 | SET + 3 Zn-F                                                                   | 1     | NP_001189 PR domain zinc finger protein 1 isoform 1 [Homo sapiens]             |
|                                                                                                                                                                                                                                                                                                                                                                                  |                                                                                                                                                                                                                                                                                                                                                                                     |                                                   |                          |                                                                        |                    | <i>Olat-PRDM2a</i>  | ENSORLP00000004978 | SET                                                                            | 2     | NP_036363 PR domain zinc finger protein 2 isoform a [Homo sapiens]             |
|                                                                                                                                                                                                                                                                                                                                                                                  |                                                                                                                                                                                                                                                                                                                                                                                     |                                                   |                          |                                                                        |                    | <i>Olat-PRDM2b</i>  | ENSORLP00000005803 | -                                                                              | 2     | NP_001007258 PR domain zinc finger protein 2 isoform c [Homo sapiens]          |
|                                                                                                                                                                                                                                                                                                                                                                                  |                                                                                                                                                                                                                                                                                                                                                                                     |                                                   |                          |                                                                        |                    | <i>Olat-PRDM3</i>   | ENSORLP00000015118 | SET + 1 Zn-F                                                                   | 3/16  | NP_001098547 MDS1 and EVI1 complex locus protein EVI1 isoform a [Homo sapiens] |
|                                                                                                                                                                                                                                                                                                                                                                                  |                                                                                                                                                                                                                                                                                                                                                                                     |                                                   |                          |                                                                        |                    | <i>Olat-PRDM4</i>   | ENSORLP00000013805 | 2 Zn-F                                                                         | 4     | NP_036538 PR domain zinc finger protein 4 [Homo sapiens]                       |
|                                                                                                                                                                                                                                                                                                                                                                                  |                                                                                                                                                                                                                                                                                                                                                                                     |                                                   |                          |                                                                        |                    | <i>Olat-PRDM5</i>   | ENSORLP00000020343 | SET + 4 Zn-F                                                                   | 5     | NP_061169 PR domain zinc finger protein 5 [Homo sapiens]                       |
|                                                                                                                                                                                                                                                                                                                                                                                  |                                                                                                                                                                                                                                                                                                                                                                                     |                                                   |                          |                                                                        |                    | <i>Olat-PRDM6</i>   | ENSORLP00000021378 | 2 Zn-F                                                                         | 6     | NP_001129711 putative histone-lysine N-methyltransferase PRDM6 [Homo sapiens]  |
|                                                                                                                                                                                                                                                                                                                                                                                  |                                                                                                                                                                                                                                                                                                                                                                                     |                                                   |                          |                                                                        |                    | <i>Olat-PRDM8a</i>  | ENSORLP00000022263 | SET + 1 Zn-F                                                                   | 8     | NP_001092873 PR domain zinc finger protein 8 [Homo sapiens]                    |
|                                                                                                                                                                                                                                                                                                                                                                                  |                                                                                                                                                                                                                                                                                                                                                                                     |                                                   |                          |                                                                        |                    | <i>Olat-PRDM8b</i>  | ENSORLP00000010984 | SET                                                                            | 8     | NP_001092873 PR domain zinc finger protein 8 [Homo sapiens]                    |
|                                                                                                                                                                                                                                                                                                                                                                                  |                                                                                                                                                                                                                                                                                                                                                                                     |                                                   |                          |                                                                        |                    | <i>Olat-PRDM7/9</i> | ENSORLP00000011010 | 6 Zn-F                                                                         | 7/9   | NP_064612 histone-lysine N-methyltransferase PRDM9 [Homo sapiens]              |
| <i>Olat-PRDM10</i>                                                                                                                                                                                                                                                                                                                                                               | ENSORLP00000003001                                                                                                                                                                                                                                                                                                                                                                  | SET + 1 Zn-F                                      | 10/15                    | NP_955469 PR domain zinc finger protein 10 isoform 2 [Homo sapiens]    |                    |                     |                    |                                                                                |       |                                                                                |
| <i>Olat-PRDM12a</i>                                                                                                                                                                                                                                                                                                                                                              | ENSORLP00000008922                                                                                                                                                                                                                                                                                                                                                                  | SET + 2 Zn-F                                      | 12                       | NP_067632 PR domain zinc finger protein 12 [Homo sapiens]              |                    |                     |                    |                                                                                |       |                                                                                |

**Table S6: Prdm genes in vertebrates.**

| Taxa                                                 | Species                                                                                                                                                                                                                                                                                                                                                                                                                              | Source of the used sequences / Sequencing centers | # PRDM genes   | Genes                                                                    | Accession proteins | Domains             | PRDM family        | Best Blast Hit Human                                                   |       |                                                                                |
|------------------------------------------------------|--------------------------------------------------------------------------------------------------------------------------------------------------------------------------------------------------------------------------------------------------------------------------------------------------------------------------------------------------------------------------------------------------------------------------------------|---------------------------------------------------|----------------|--------------------------------------------------------------------------|--------------------|---------------------|--------------------|------------------------------------------------------------------------|-------|--------------------------------------------------------------------------------|
| Adriamanthoidea, Adrianchthyidae, Oryziinae, Oryzias |                                                                                                                                                                                                                                                                                                                                                                                                                                      |                                                   | 1              | <i>Olat-PRDM12b</i>                                                      | ENSORLP00000021967 | SET + 2 Zn-F        | 12                 | NP_067632 PR domain zinc finger protein 12 [Homo sapiens]              |       |                                                                                |
|                                                      |                                                                                                                                                                                                                                                                                                                                                                                                                                      |                                                   |                | <i>Olat-PRDM13</i>                                                       | ENSORLP0000002644  | SET + 1 Zn-F        | 13                 | NP_067633 PR domain zinc finger protein 13 [Homo sapiens]              |       |                                                                                |
|                                                      |                                                                                                                                                                                                                                                                                                                                                                                                                                      |                                                   |                | <i>Olat-PRDM14</i>                                                       | ENSORLP00000010172 | SET + 2 Zn-F        | 14                 | NP_078780 PR domain zinc finger protein 14 [Homo sapiens]              |       |                                                                                |
|                                                      |                                                                                                                                                                                                                                                                                                                                                                                                                                      |                                                   |                | <i>Olat-PRDM15</i>                                                       | ENSORLP00000015690 | 2 Zn-F              | 10/15              | NP_001035514 PR domain zinc finger protein 15 isoform 2 [Homo sapiens] |       |                                                                                |
|                                                      |                                                                                                                                                                                                                                                                                                                                                                                                                                      |                                                   |                | <i>Olat-PRDM16</i>                                                       | ENSORLP00000005644 | SET + 2 Zn-F        | 3/16               | NP_071397 PR domain zinc finger protein 16 isoform 1 [Homo sapiens]    |       |                                                                                |
| Teleostei                                            | Craniata; Vertebrata; Gnathostomata; Teleostomi; Euteleostomi; Actinopterygii; Actinopteri; Neopterygii; Teleostei; Elopoccephala; Clupecocephala; Euteleostei; Neognathi; Neoteleostei; Eurypterygii; Ctenosquamata; Acanthomorpha; Euacanthomorpha; Holacanthopterygii; Acanthopterygii; Euacanthopterygii; Percomorpha; Smegmomorpha; Atherinomorpha; Cyprinodontiformes; Cyprinodontoidae; Poeciliidae; Poeciliinae; Xiphophorus | <i>Xiphophorus maculatus</i>                      | Platyfish      | Ensembl / The Genome Institute, Washington University School of Medicine | 17                 | <i>Xmac-PRDM1a</i>  | ENSXMAP00000013381 | SET + 5 Zn-F                                                           | 1     | NP_001189 PR domain zinc finger protein 1 isoform 1 [Homo sapiens]             |
|                                                      |                                                                                                                                                                                                                                                                                                                                                                                                                                      |                                                   |                |                                                                          |                    | <i>Xmac-PRDM1b</i>  | ENSXMAP00000003426 | SET + 4 Zn-F                                                           | 1     | NP_001189 PR domain zinc finger protein 1 isoform 1 [Homo sapiens]             |
|                                                      |                                                                                                                                                                                                                                                                                                                                                                                                                                      |                                                   |                |                                                                          |                    | <i>Xmac-PRDM1c</i>  | ENSXMAP00000016799 | SET + 4 Zn-F                                                           | 1     | NP_001189 PR domain zinc finger protein 1 isoform 1 [Homo sapiens]             |
|                                                      |                                                                                                                                                                                                                                                                                                                                                                                                                                      |                                                   |                |                                                                          |                    | <i>Xmac-PRDM2a</i>  | ENSXMAP00000017089 | SET                                                                    | 2     | NP_001007258 PR domain zinc finger protein 2 isoform c [Homo sapiens]          |
|                                                      |                                                                                                                                                                                                                                                                                                                                                                                                                                      |                                                   |                |                                                                          |                    | <i>Xmac-PRDM3</i>   | ENSXMAP00000010771 | 4 Zn-F                                                                 | 3/16  | NP_001098547 MDS1 and EVI1 complex locus protein EVI1 isoform a [Homo sapiens] |
|                                                      |                                                                                                                                                                                                                                                                                                                                                                                                                                      |                                                   |                |                                                                          |                    | <i>Xmac-PRDM4</i>   | ENSXMAP00000004305 | SET + 3 Zn-F                                                           | 4     | NP_036538 PR domain zinc finger protein 4 [Homo sapiens]                       |
|                                                      |                                                                                                                                                                                                                                                                                                                                                                                                                                      |                                                   |                |                                                                          |                    | <i>Xmac-PRDM5</i>   | ENSXMAP00000013864 | SET + 4 Zn-F                                                           | 5     | NP_061169 PR domain zinc finger protein 5 [Homo sapiens]                       |
|                                                      |                                                                                                                                                                                                                                                                                                                                                                                                                                      |                                                   |                |                                                                          |                    | <i>Xmac-PRDM6</i>   | ENSXMAP00000015346 | SET                                                                    | 6     | NP_001129711 putative histone-lysine N-methyltransferase PRDM6 [Homo sapiens]  |
|                                                      |                                                                                                                                                                                                                                                                                                                                                                                                                                      |                                                   |                |                                                                          |                    | <i>Xmac-PRDM8</i>   | ENSXMAP00000010001 | SET + 1 Zn-F                                                           | 8     | NP_001092873 PR domain zinc finger protein 8 [Homo sapiens]                    |
|                                                      |                                                                                                                                                                                                                                                                                                                                                                                                                                      |                                                   |                |                                                                          |                    | <i>Xmac-PRDM10</i>  | ENSXMAP00000007760 | SET + 1 Zn-F                                                           | 10/15 | NP_955469 PR domain zinc finger protein 10 isoform 2 [Homo sapiens]            |
|                                                      |                                                                                                                                                                                                                                                                                                                                                                                                                                      |                                                   |                |                                                                          |                    | <i>Xmac-PRDM12a</i> | ENSXMAP00000005547 | SET + 3 Zn-F                                                           | 12    | NP_067632 PR domain zinc finger protein 12 [Homo sapiens]                      |
|                                                      |                                                                                                                                                                                                                                                                                                                                                                                                                                      |                                                   |                |                                                                          |                    | <i>Xmac-PRDM12b</i> | ENSXMAP00000000473 | SET                                                                    | 12    | NP_067632 PR domain zinc finger protein 12 [Homo sapiens]                      |
|                                                      |                                                                                                                                                                                                                                                                                                                                                                                                                                      |                                                   |                |                                                                          |                    | <i>Xmac-PRDM13</i>  | ENSXMAP00000002545 | SET + 2 Zn-F                                                           | 13    | NP_067633 PR domain zinc finger protein 13 [Homo sapiens]                      |
|                                                      |                                                                                                                                                                                                                                                                                                                                                                                                                                      |                                                   |                |                                                                          |                    | <i>Xmac-PRDM14</i>  | ENSXMAP00000010265 | SET + 3 Zn-F                                                           | 14    | NP_078780 PR domain zinc finger protein 14 [Homo sapiens]                      |
|                                                      |                                                                                                                                                                                                                                                                                                                                                                                                                                      |                                                   |                |                                                                          |                    | <i>Xmac-PRDM15</i>  | ENSXMAP00000013890 | 1 Zn-F                                                                 | 10/15 | NP_001035514 PR domain zinc finger protein 15 isoform 2 [Homo sapiens]         |
|                                                      |                                                                                                                                                                                                                                                                                                                                                                                                                                      |                                                   |                |                                                                          |                    | <i>Xmac-PRDM16</i>  | ENSXMAP00000019119 | SET + 8 Zn-F                                                           | 3/16  | NP_071397 PR domain zinc finger protein 16 isoform 1 [Homo sapiens]            |
|                                                      |                                                                                                                                                                                                                                                                                                                                                                                                                                      |                                                   |                |                                                                          |                    | <i>Xmac-PRDM17</i>  | ENSXMAP00000018382 | 4 Zn-F                                                                 | 17    | NP_079017 zinc finger protein 408 isoform 1 [Homo sapiens]                     |
| Teleostei                                            | Craniata; Vertebrata; Gnathostomata; Teleostomi; Euteleostomi; Actinopterygii; Actinopteri; Neopterygii; Teleostei; Elopoccephala; Clupecocephala; Euteleostei; Neognathi; Neoteleostei; Eurypterygii; Ctenosquamata; Acanthomorpha; Euacanthomorpha; Holacanthopterygii; Acanthopterygii; Euacanthopterygii; Percomorpha; Perciformes; Labroidae; Cichlidae; African cichlids; Pseudocrenilabrinae; Oreochromini; Oreochromis       | <i>Oreochromis niloticus</i>                      | Nile tilapia   | Ensembl / The Broad Institute of Harvard and MIT                         | 19                 | <i>Onil-PRDM1a</i>  | ENSONIP00000008446 | SET + 4 Zn-F                                                           | 1     | NP_001189 PR domain zinc finger protein 1 isoform 1 [Homo sapiens]             |
|                                                      |                                                                                                                                                                                                                                                                                                                                                                                                                                      |                                                   |                |                                                                          |                    | <i>Onil-PRDM1c</i>  | ENSONIP00000017081 | SET + 4 Zn-F                                                           | 1     | NP_001189 PR domain zinc finger protein 1 isoform 1 [Homo sapiens]             |
|                                                      |                                                                                                                                                                                                                                                                                                                                                                                                                                      |                                                   |                |                                                                          |                    | <i>Onil-PRDM1b</i>  | ENSONIP00000018515 | SET + 4 Zn-F                                                           | 1     | NP_001189 PR domain zinc finger protein 1 isoform 1 [Homo sapiens]             |
|                                                      |                                                                                                                                                                                                                                                                                                                                                                                                                                      |                                                   |                |                                                                          |                    | <i>Onil-PRDM2b</i>  | ENSONIP00000002697 | -                                                                      | 2     | NP_001007258 PR domain zinc finger protein 2 isoform c [Homo sapiens]          |
|                                                      |                                                                                                                                                                                                                                                                                                                                                                                                                                      |                                                   |                |                                                                          |                    | <i>Onil-PRDM2a</i>  | ENSONIP00000004947 | SET                                                                    | 2     | NP_001007258 PR domain zinc finger protein 2 isoform c [Homo sapiens]          |
|                                                      |                                                                                                                                                                                                                                                                                                                                                                                                                                      |                                                   |                |                                                                          |                    | <i>Onil-PRDM3</i>   | ENSONIP00000007026 | SET + 6 Zn-F                                                           | 3/16  | NP_004982 MDS1 and EVI1 complex locus protein EVI1 isoform c [Homo sapiens]    |
|                                                      |                                                                                                                                                                                                                                                                                                                                                                                                                                      |                                                   |                |                                                                          |                    | <i>Onil-PRDM4</i>   | ENSONIP00000021069 | SET + 3 Zn-F                                                           | 4     | NP_036538 PR domain zinc finger protein 4 [Homo sapiens]                       |
|                                                      |                                                                                                                                                                                                                                                                                                                                                                                                                                      |                                                   |                |                                                                          |                    | <i>Onil-PRDM5</i>   | ENSONIP00000003899 | SET + 4 Zn-F                                                           | 5     | NP_061169 PR domain zinc finger protein 5 [Homo sapiens]                       |
|                                                      |                                                                                                                                                                                                                                                                                                                                                                                                                                      |                                                   |                |                                                                          |                    | <i>Onil-PRDM6</i>   | ENSONIP00000017375 | SET + 2 Zn-F                                                           | 6     | NP_001129711 putative histone-lysine N-methyltransferase PRDM6 [Homo sapiens]  |
|                                                      |                                                                                                                                                                                                                                                                                                                                                                                                                                      |                                                   |                |                                                                          |                    | <i>Onil-PRDM8</i>   | ENSONIP00000017647 | SET + 1 Zn-F                                                           | 8     | NP_001092873 PR domain zinc finger protein 8 [Homo sapiens]                    |
|                                                      |                                                                                                                                                                                                                                                                                                                                                                                                                                      |                                                   |                |                                                                          |                    | <i>Onil-PRDM7/9</i> | ENSONIP00000010036 | SET + 3 Zn-F                                                           | 7/9   | NP_064612 histone-lysine N-methyltransferase PRDM9 [Homo sapiens]              |
|                                                      |                                                                                                                                                                                                                                                                                                                                                                                                                                      |                                                   |                |                                                                          |                    | <i>Onil-PRDM10</i>  | ENSONIP00000005157 | SET + 1 Zn-F                                                           | 10/15 | NP_064613 PR domain zinc finger protein 10 isoform 1 [Homo sapiens]            |
|                                                      |                                                                                                                                                                                                                                                                                                                                                                                                                                      |                                                   |                |                                                                          |                    | <i>Onil-PRDM12a</i> | ENSONIP00000003595 | SET + 3 Zn-F                                                           | 12    | NP_067632 PR domain zinc finger protein 12 [Homo sapiens]                      |
|                                                      |                                                                                                                                                                                                                                                                                                                                                                                                                                      |                                                   |                |                                                                          |                    | <i>Onil-PRDM12b</i> | ENSONIP00000000841 | SET                                                                    | 12    | NP_067632 PR domain zinc finger protein 12 [Homo sapiens]                      |
|                                                      |                                                                                                                                                                                                                                                                                                                                                                                                                                      |                                                   |                |                                                                          |                    | <i>Onil-PRDM13</i>  | ENSONIP00000000138 | SET + 1 Zn-F                                                           | 13    | NP_067633 PR domain zinc finger protein 13 [Homo sapiens]                      |
|                                                      |                                                                                                                                                                                                                                                                                                                                                                                                                                      |                                                   |                |                                                                          |                    | <i>Onil-PRDM14</i>  | ENSONIP00000017914 | SET + 3 Zn-F                                                           | 14    | NP_078780 PR domain zinc finger protein 14 [Homo sapiens]                      |
|                                                      |                                                                                                                                                                                                                                                                                                                                                                                                                                      |                                                   |                |                                                                          |                    | <i>Onil-PRDM15</i>  | ENSONIP00000014290 | -                                                                      | 10/15 | NP_071398 PR domain zinc finger protein 15 isoform 1 [Homo sapiens]            |
| <i>Onil-PRDM16</i>                                   | ENSONIP00000002644                                                                                                                                                                                                                                                                                                                                                                                                                   | 7 Zn-F                                            | 3/16           | NP_071397 PR domain zinc finger protein 16 isoform 1 [Homo sapiens]      |                    |                     |                    |                                                                        |       |                                                                                |
| <i>Onil-PRDM17</i>                                   | ENSONIP00000000874                                                                                                                                                                                                                                                                                                                                                                                                                   | 3 Zn-F                                            | 17             | NP_079017 zinc finger protein 408 isoform 1 [Homo sapiens]               |                    |                     |                    |                                                                        |       |                                                                                |
| Chondrichthyes                                       | Craniata; Vertebrata; Chondrichthyes                                                                                                                                                                                                                                                                                                                                                                                                 | <i>Callorhynchus milii</i>                        | Elephant shark | Elephant shark                                                           | 17                 | <i>Cmil-PRDM1a</i>  | SINCAMP00000008650 | SET + 5 Zn-F                                                           | 1     | NP_001189 PR domain zinc finger protein 1 isoform 1 [Homo sapiens]             |

**Table S6: Prdm genes in vertebrates.**

| Taxa                                                                                       | Species            | Source of the used sequences / Sequencing centers                           | # PRDM genes | Genes               | Accession proteins        | Domains                                                 | PRDM family | Best Blast Hit Human                                                           |
|--------------------------------------------------------------------------------------------|--------------------|-----------------------------------------------------------------------------|--------------|---------------------|---------------------------|---------------------------------------------------------|-------------|--------------------------------------------------------------------------------|
| Gnathostomata; Chondrichthyes; Holocephali; Chimaeriformes; Callorhynchidae; Callorhynchus |                    | A*STAR Singapore/ International Elephant Shark Genome Sequencing Consortium |              | <i>Cmil-PRDM1b</i>  | SINCAMP00000015280        | SET + 4 Zn-F                                            | 1           | NP_001189 PR domain zinc finger protein 1 isoform 1 [Homo sapiens]             |
|                                                                                            |                    |                                                                             |              | <i>Cmil-PRDM2</i>   | SINCAMP00000009944        | -                                                       | 2           | NP_001007258 PR domain zinc finger protein 2 isoform c [Homo sapiens]          |
|                                                                                            |                    |                                                                             |              | <i>Cmil-PRDM3</i>   | SINCAMP00000024526        | SET + 7 Zn-F                                            | 3/16        | NP_004982 MDS1 and EVI1 complex locus protein EVI1 isoform c [Homo sapiens]    |
|                                                                                            |                    |                                                                             |              | <i>Cmil-PRDM4</i>   | SINCAMP00000000798        | SET + 3 Zn-F                                            | 4           | NP_036538 PR domain zinc finger protein 4 [Homo sapiens]                       |
|                                                                                            |                    |                                                                             |              | <i>Cmil-PRDM5</i>   | SINCAMP00000016250        | SET + 4 Zn-F                                            | 5           | NP_061169 PR domain zinc finger protein 5 [Homo sapiens]                       |
|                                                                                            |                    |                                                                             |              | <i>Cmil-PRDM6</i>   | SINCAMP00000008474        | SET + 2 Zn-F                                            | 6           | NP_001129711 putative histone-lysine N-methyltransferase PRDM6 [Homo sapiens]  |
|                                                                                            |                    |                                                                             |              | <i>Cmil-PRDM8a</i>  | SINCAMP00000023046        | SET                                                     | 8           | NP_001092873 PR domain zinc finger protein 8 [Homo sapiens]                    |
|                                                                                            |                    |                                                                             |              | <i>Cmil-PRDM8b</i>  | SINCAMP00000006559        | SET                                                     | 8           | NP_001092873 PR domain zinc finger protein 8 [Homo sapiens]                    |
|                                                                                            |                    |                                                                             |              | <i>Cmil-PRDM10</i>  | SINCAMP00000018809        | SET + 1 Zn-F                                            | 10/15       | NP_955469 PR domain zinc finger protein 10 isoform 2 [Homo sapiens]            |
|                                                                                            |                    |                                                                             |              | <i>Cmil-PRDM12</i>  | SINCAMP00000002817        | 2 Zn-F                                                  | 12          | NP_067632 PR domain zinc finger protein 12 [Homo sapiens]                      |
|                                                                                            |                    |                                                                             |              | <i>Cmil-PRDM13</i>  | SINCAMP00000024288        | SET + 1 Zn-F                                            | 13          | NP_067633 PR domain zinc finger protein 13 [Homo sapiens]                      |
|                                                                                            |                    |                                                                             |              | <i>Cmil-PRDM14a</i> | SINCAMP00000009895        | 2 Zn-F                                                  | 14          | NP_078780 PR domain zinc finger protein 14 [Homo sapiens]                      |
|                                                                                            |                    |                                                                             |              | <i>Cmil-PRDM14b</i> | SINCAMP00000015982        | -                                                       | 14          | NP_078780 PR domain zinc finger protein 14 [Homo sapiens]                      |
|                                                                                            |                    |                                                                             |              | <i>Cmil-PRDM15</i>  | SINCAMP00000002864        | 2 Zn-F                                                  | 10/15       | NP_001035514 PR domain zinc finger protein 15 isoform 2 [Homo sapiens]         |
|                                                                                            |                    |                                                                             |              | <i>Cmil-PRDM16</i>  | SINCAMP00000011229        | SET + 4 Zn-F                                            | 3/16        | NP_071397 PR domain zinc finger protein 16 isoform 1 [Homo sapiens]            |
|                                                                                            |                    |                                                                             |              | <i>Cmil-PRDM17</i>  | SINCAMP00000000245        | 5 Zn-F                                                  | 17          | NP_001171680 zinc finger protein 408 isoform 2 [Homo sapiens]                  |
|                                                                                            |                    |                                                                             |              | Petromyzontiformes  | <i>Petromyzon marinus</i> | Ensembl / The Genome Institute at Washington University | 9           | <i>Pmar-PRDM1</i>                                                              |
| <i>Pmar-PRDM3/16</i>                                                                       | ENSPMAP00000007374 | 1 Zn-F                                                                      | 3/16         |                     |                           |                                                         |             | NP_001098547 MDS1 and EVI1 complex locus protein EVI1 isoform a [Homo sapiens] |
| <i>Pmar-PRDM4</i>                                                                          | ENSPMAP00000003945 | 1 Zn-F                                                                      | 4            |                     |                           |                                                         |             | NP_036538 PR domain zinc finger protein 4 [Homo sapiens]                       |
| <i>Pmar-PRDM5</i>                                                                          | ENSPMAP00000005770 | 3 Zn-F                                                                      | 5            |                     |                           |                                                         |             | NP_061169 PR domain zinc finger protein 5 [Homo sapiens]                       |
| <i>Pmar-PRDM6</i>                                                                          | ENSPMAP00000007500 | 1 Zn-F                                                                      | 6            |                     |                           |                                                         |             | NP_001129711 putative histone-lysine N-methyltransferase PRDM6 [Homo sapiens]  |
| <i>Pmar-PRDM8</i>                                                                          | ENSPMAP00000006345 | 1 Zn-F                                                                      | 8            |                     |                           |                                                         |             | NP_001092873 PR domain zinc finger protein 8 [Homo sapiens]                    |
| <i>Pmar-PRDM7/9a</i>                                                                       | ENSPMAP00000008984 | SET + 4 Zn-F                                                                | 7/9          |                     |                           |                                                         |             | NP_064612 histone-lysine N-methyltransferase PRDM9 [Homo sapiens]              |
| <i>Pmar-PRDM7/9b</i>                                                                       | ENSPMAP00000010842 | SET + 1 Zn-F                                                                | 7/9          |                     |                           |                                                         |             | NP_064612 histone-lysine N-methyltransferase PRDM9 [Homo sapiens]              |
| <i>Pmar-PRDM15</i>                                                                         | ENSPMAP00000010764 | 2 Zn-F                                                                      | 10/15        |                     |                           |                                                         |             | NP_001035514 PR domain zinc finger protein 15 isoform 2 [Homo sapiens]         |

**Table S7: Statistical support of the Prdm subfamilies and some groupings of subfamilies in the different phylogenetic analyses.**

| Families             | Dataset 1  |            |          | Dataset 2  |            |          | Dataset 3  |            |          | Dataset 4  |            |          |
|----------------------|------------|------------|----------|------------|------------|----------|------------|------------|----------|------------|------------|----------|
|                      | Phyml aLRT | Phyml Boot | Bayes PP | Phyml aLRT | Phyml Boot | Bayes PP | Phyml aLRT | Phyml Boot | Bayes PP | Phyml aLRT | Phyml Boot | Bayes PP |
| PRDM1                | 0,77       | 65         | 97       | 1          | 86         | 99       | 0,88       | 77         | 92       | 0,94       | 75         | 90       |
| PRDM2                | 0,83       | 71         | 95       | 0,84       | 77         | 86       | 0,91       | 81         | 87       | 0,89       | 77         | 87       |
| PRDM3/16             | 1          | 95         | 100      | 0,8        | 56         | 52       | 1          | 91         | 100      | 0,99       | 89         | 100      |
| PRDM4                | 0,91       | 88         | 91       | 0,99       | 81         | 77       | 0,88       | 74         | 91       | 0,76       | 77         | 86       |
| PRDM5                | 0,92       | 81         | 91       | 1          | 90         | 92       | 0,93       | 80         | 96       | 0,95       | 81         | 98       |
| PRDM6                | 0,99       | 91         | 98       | 1          | 92         | 89       | 0,88       | 77         | 79       | 0,91       | 75         | 89       |
| PRDM7/9              | 0,57       | 50         | 71       | 0,84       | 65         | 71       | 0,88       | 75         | 66       | 0,90       | 76         | 96       |
| PRDM8                | 0,92       | 85         | 98       | 0,98       | 76         | 75       | 0,84       | 70         | 75       | 0,88       | 69         | 84       |
| PRDM10/15            | 0,98       | 79         | 92       | 0,99       | 71         | 66       | 1          | 91         | 87       | 1          | 96         | 100      |
| PRDM11               | 1          | 100        | 100      | 1          | 91         | 99       | 1          | 94         | 100      | 0,99       | 90         | 94       |
| PRDM12               | 0,97       | 89         | 99       | 1          | 93         | 95       | 1          | 95         | 96       | 1          | 93         | 99       |
| PRDM13               | 0,99       | 95         | 100      | 1          | 92         | 100      | 1          | 91         | 88       | 1          | 91         | 100      |
| PRDM14               | 0,79       | 67         | 85       | 0,94       | 81         | 74       | 0,96       | 88         | 99       | 0,97       | 92         | 97       |
| PRDM17               | 1          | 100        | 100      | 0,99       | 87         | 96       | 1          | 99         | 100      | 0,98       | 97         | 99       |
| High-order groupings | Phyml aLRT | Phyml Boot | Bayes PP | Phyml aLRT | Phyml Boot | Bayes PP | Phyml aLRT | Phyml Boot | Bayes PP | Phyml aLRT | Phyml Boot | Bayes PP |
| PRDM14 + PRDM5       | 0,87       | 35         | 60       | -          | -          | -        | -          | -          | -        | 0,66       | 45         | 78       |
| PRDM4 + PRDM10/15    | 0,88       | 55         | 87       | -          | -          | -        | -          | -          | -        | 0,57       | 46         | 64       |
| PRDM2 + PRDM3/16     | 0,58       | 15         | -        | -          | -          | -        | -          | -          | -        | 0,49       | 42         | 51       |
| PRDM8 + PRDM13       | 0,94       | 73         | 91       | 0,93       | 56         | 98       | 0,91       | 66         | 88       | 0,88       | 61         | 87       |
| PRDM12 + PRDM6       | 0,20       | 5          | -        | 0,97       | 61         | 100      | 0,95       | 71         | 77       | 0,41       | 33         | -        |

| Families  | Phyml aLRT values |               |                  |               |               |               |                 |               |                   |                |                |                |                |                |                 |
|-----------|-------------------|---------------|------------------|---------------|---------------|---------------|-----------------|---------------|-------------------|----------------|----------------|----------------|----------------|----------------|-----------------|
|           | without PRDM1     | without PRDM2 | without PRDM3/16 | without PRDM4 | without PRDM5 | without PRDM6 | without PRDM7/9 | without PRDM8 | without PRDM10/15 | without PRDM11 | without PRDM12 | without PRDM13 | without PRDM14 | without PRDM17 | without Orphans |
| PRDM1     | -                 | 0,81          | 0,84             | 0,87          | 0,82          | 0,81          | 0,89            | 0,85          | 0,83              | 0,86           | 0,89           | 0,85           | 0,82           | 0,85           | 0,92            |
| PRDM2     | 0,82              | -             | 0,79             | 0,80          | 0,85          | 0,88          | 0,78            | 0,82          | 0,84              | 0,85           | 0,82           | 0,88           | 0,81           | 0,87           | 0,89            |
| PRDM3/16  | 0,99              | 0,94          | -                | 0,89          | 0,91          | 0,90          | 0,94            | 0,94          | 0,91              | 0,92           | 0,94           | 0,95           | 0,92           | 0,91           | 0,97            |
| PRDM4     | 0,74              | 0,68          | 0,67             | -             | 0,71          | 0,71          | 0,72            | 0,73          | 0,78              | 0,71           | 0,70           | 0,71           | 0,73           | 0,78           | 0,77            |
| PRDM5     | 0,91              | 0,92          | 0,92             | 0,91          | -             | 0,93          | 0,89            | 0,91          | 0,92              | 0,93           | 0,89           | 0,91           | 0,90           | 0,92           | 0,93            |
| PRDM6     | 0,98              | 0,91          | 0,93             | 0,95          | 0,97          | -             | 0,99            | 0,94          | 0,92              | 0,95           | 0,99           | 0,94           | 0,95           | 0,94           | 0,99            |
| PRDM7/9   | 0,55              | 0,61          | 0,61             | 0,59          | 0,58          | 0,61          | -               | 0,57          | 0,61              | 0,66           | 0,61           | 0,58           | 0,54           | 0,59           | 0,61            |
| PRDM8     | 0,87              | 0,81          | 0,81             | 0,82          | 0,84          | 0,88          | 0,89            | -             | 0,84              | 0,90           | 0,88           | 0,81           | 0,88           | 0,87           | 0,86            |
| PRDM10/15 | 0,81              | 0,84          | 0,79             | 0,80          | 0,82          | 0,78          | 0,79            | 0,78          | -                 | 0,82           | 0,84           | 0,77           | 0,80           | 0,81           | 0,84            |
| PRDM11    | 1                 | 0,99          | 1                | 0,98          | 0,99          | 1             | 0,98            | 1             | 1                 | -              | 0,99           | 0,97           | 0,96           | 0,97           | 1               |
| PRDM12    | 0,95              | 0,97          | 0,94             | 0,98          | 0,99          | 0,98          | 0,94            | 0,96          | 0,99              | 0,98           | -              | 0,96           | 0,98           | 0,95           | 0,99            |
| PRDM13    | 0,94              | 0,92          | 0,95             | 0,94          | 0,91          | 0,94          | 0,90            | 0,91          | 0,91              | 0,93           | 0,94           | -              | 0,95           | 0,90           | 0,97            |
| PRDM14    | 0,81              | 0,88          | 0,84             | 0,86          | 0,88          | 0,79          | 0,88            | 0,86          | 0,84              | 0,87           | 0,88           | 0,81           | -              | 0,81           | 0,87            |
| PRDM17    | 1                 | 1             | 1                | 1             | 0,99          | 1             | 1               | 1             | 1                 | 0,99           | 1              | 0,98           | 1              | -              | 1               |





**Table S8: Character matrix used to infer ancestral sets of Prdm subfamilies in metazoans.**

|                                   |   |   |   |   |   |   |   |   |   |   |   |   |   |   |   |
|-----------------------------------|---|---|---|---|---|---|---|---|---|---|---|---|---|---|---|
| <i>Oryctolagus cuniculus</i>      | 1 | 1 | 1 | 1 | 1 | 1 | 1 | 1 | 1 | 1 | 1 | 1 | 1 | 1 | 1 |
| <i>Microcebus murinus</i>         | 1 | 1 | 1 | 1 | 1 | 1 | 1 | 0 | 1 | 1 | 1 | 1 | 1 | 1 | 1 |
| <i>Otolemur garnettii</i>         | 1 | 1 | 1 | 1 | 1 | 0 | 1 | 1 | 1 | 1 | 1 | 1 | 1 | 1 | 1 |
| <i>Tarsius syrichta</i>           | 1 | 1 | 1 | 1 | 1 | 1 | 0 | 0 | 1 | 1 | 0 | 0 | 1 | 1 | 1 |
| <i>Callithrix jacchus</i>         | 1 | 1 | 1 | 1 | 1 | 1 | 1 | 1 | 1 | 1 | 1 | 1 | 1 | 1 | 1 |
| <i>Macaca mulatta</i>             | 1 | 1 | 1 | 1 | 1 | 1 | 1 | 1 | 1 | 1 | 0 | 0 | 1 | 1 | 1 |
| <i>Nomascus leucogenys</i>        | 1 | 1 | 1 | 1 | 1 | 1 | 1 | 1 | 1 | 1 | 1 | 1 | 1 | 1 | 1 |
| <i>Gorilla gorilla</i>            | 1 | 1 | 1 | 1 | 1 | 0 | 1 | 1 | 1 | 1 | 1 | 1 | 1 | 1 | 1 |
| <i>Pongo abelii</i>               | 1 | 1 | 1 | 1 | 1 | 0 | 1 | 1 | 1 | 0 | 1 | 1 | 1 | 1 | 1 |
| <i>Pan troglodytes</i>            | 1 | 1 | 1 | 1 | 1 | 1 | 1 | 1 | 1 | 1 | 1 | 1 | 1 | 1 | 1 |
| <i>Homo sapiens</i>               | 1 | 1 | 1 | 1 | 1 | 1 | 1 | 1 | 1 | 1 | 1 | 1 | 1 | 1 | 1 |
| <i>Crassostrea gigas</i>          | 1 | 0 | 1 | 1 | 0 | 0 | 0 | 0 | 1 | 0 | 1 | 1 | 1 | 0 | 0 |
| <i>Lottia gigantea</i>            | 1 | 1 | 1 | 1 | 0 | 0 | 1 | 1 | 1 | 0 | 1 | 1 | 1 | 0 | 0 |
| <i>Pinctada fucata</i>            | 0 | 0 | 1 | 0 | 0 | 0 | 1 | 1 | 1 | 0 | 0 | 0 | 0 | 0 | 0 |
| <i>Platynereis dumerilii</i>      | 1 | 0 | 1 | 1 | 0 | 0 | 1 | 1 | 1 | 0 | 1 | 1 | 1 | 0 | 0 |
| <i>Capitella teleta</i>           | 1 | 1 | 1 | 1 | 0 | 0 | 0 | 1 | 1 | 0 | 0 | 1 | 1 | 0 | 0 |
| <i>Helobdella robusta</i>         | 1 | 0 | 1 | 0 | 0 | 0 | 0 | 0 | 1 | 0 | 0 | 1 | 1 | 0 | 0 |
| <i>Adineta vaga</i>               | 1 | 0 | 1 | 0 | 0 | 0 | 0 | 1 | 0 | 0 | 0 | 1 | 0 | 0 | 0 |
| <i>Schmidtea mediterranea</i>     | 1 | 0 | 1 | 0 | 0 | 0 | 0 | 1 | 0 | 0 | 0 | 1 | 1 | 0 | 0 |
| <i>Schistosoma mansoni</i>        | 1 | 0 | 1 | 0 | 0 | 0 | 0 | 1 | 0 | 0 | 0 | 0 | 0 | 0 | 0 |
| <i>Caenorhabditis elegans</i>     | 1 | 0 | 0 | 0 | 0 | 0 | 1 | 0 | 0 | 0 | 0 | 0 | 0 | 0 | 0 |
| <i>Pristionchus pacificus</i>     | 1 | 0 | 0 | 0 | 0 | 0 | 1 | 1 | 0 | 0 | 0 | 0 | 0 | 0 | 0 |
| <i>Brugia malayi</i>              | 1 | 0 | 1 | 0 | 0 | 0 | 1 | 0 | 0 | 0 | 0 | 0 | 0 | 0 | 0 |
| <i>Loa loa</i>                    | 1 | 0 | 1 | 0 | 0 | 0 | 1 | 0 | 0 | 0 | 0 | 0 | 0 | 0 | 0 |
| <i>Wuchereria bancrofti</i>       | 1 | 0 | 1 | 0 | 0 | 0 | 1 | 0 | 0 | 0 | 0 | 0 | 0 | 0 | 0 |
| <i>Trichinella spiralis</i>       | 1 | 0 | 1 | 0 | 0 | 0 | 0 | 0 | 0 | 0 | 0 | 1 | 0 | 0 | 0 |
| <i>Metaseiulus occidentalis</i>   | 1 | 0 | 1 | 0 | 0 | 0 | 0 | 1 | 0 | 0 | 0 | 1 | 0 | 0 | 0 |
| <i>Ixodes scapularis</i>          | 0 | 0 | 1 | 0 | 0 | 0 | 0 | 1 | 1 | 0 | 1 | 1 | 0 | 0 | 0 |
| <i>Tetranychus urticae</i>        | 1 | 0 | 1 | 0 | 0 | 0 | 0 | 1 | 0 | 0 | 0 | 1 | 0 | 0 | 0 |
| <i>Strigamia maritima</i>         | 1 | 0 | 1 | 1 | 0 | 0 | 1 | 1 | 1 | 0 | 1 | 1 | 0 | 0 | 0 |
| <i>Daphnia pulex</i>              | 1 | 0 | 1 | 0 | 0 | 0 | 0 | 1 | 0 | 0 | 0 | 1 | 0 | 0 | 0 |
| <i>Pediculus humanus corporis</i> | 1 | 0 | 1 | 0 | 0 | 0 | 0 | 1 | 1 | 0 | 0 | 1 | 0 | 0 | 0 |
| <i>Acyrtosiphon pisum</i>         | 1 | 0 | 1 | 0 | 0 | 0 | 0 | 1 | 1 | 0 | 0 | 0 | 0 | 0 | 0 |
| <i>Rhodnius prolixus</i>          | 1 | 0 | 1 | 0 | 0 | 0 | 0 | 0 | 0 | 0 | 0 | 1 | 0 | 0 | 0 |
| <i>Aedes aegypti</i>              | 1 | 0 | 1 | 0 | 0 | 0 | 0 | 1 | 0 | 0 | 0 | 1 | 0 | 0 | 0 |
| <i>Culex quinquefasciatus</i>     | 1 | 0 | 1 | 0 | 0 | 0 | 0 | 1 | 0 | 0 | 0 | 1 | 0 | 0 | 0 |
| <i>Drosophila melanogaster</i>    | 1 | 0 | 1 | 0 | 0 | 0 | 0 | 1 | 0 | 0 | 0 | 1 | 0 | 0 | 0 |



**Table S9: Inference by Dollo-like parsimony of the presence of the different subfamilies at the different nodes of the phylogenetic trees shown in Figure 3.**

« X » denotes presence.

| Ancestors (nodes)                            | Figure | Prdm1 | Prdm2 | Prdm3/16 | Prdm4 | Prdm5 | Prdm6 | Prdm7/9 | Prdm8 | Prdm10/15 | Prdm11 | Prdm12 | Prdm13 | Prdm14 | Prdm17 |
|----------------------------------------------|--------|-------|-------|----------|-------|-------|-------|---------|-------|-----------|--------|--------|--------|--------|--------|
| Metazoa                                      | 3A     | -     | -     | -        | -     | -     | X     | X       | -     | -         | -      | X      | -      | -      | -      |
| Porifera                                     | 3A     | -     | -     | -        | -     | -     | X     | X       | -     | -         | -      | X      | -      | -      | -      |
| Bilateria + Cnidaria + Ctenophora + Placozoa | 3A     | -     | -     | -        | -     | -     | X     | X       | -     | -         | -      | X      | X      | -      | -      |
| Bilateria + Cnidaria + Ctenophora            | 3A     | -     | -     | -        | -     | -     | X     | X       | X     | -         | -      | X      | X      | X      | -      |
| Cnidaria + Ctenophora                        | 3A     | -     | -     | -        | -     | -     | X     | X       | X     | -         | -      | X      | X      | X      | -      |
| Cnidaria                                     | 3A     | -     | -     | -        | -     | -     | X     | X       | -     | -         | -      | X      | X      | X      | -      |
| Ctenophora                                   | 3A     | -     | -     | -        | -     | -     | X     | -       | X     | -         | -      | -      | -      | -      | -      |
| Metazoa                                      | 3B     | -     | -     | -        | -     | -     | X     | -       | X     | -         | -      | -      | -      | -      | -      |
| Ctenophora                                   | 3B     | -     | -     | -        | -     | -     | X     | -       | X     | -         | -      | -      | -      | -      | -      |
| Bilateria + Cnidaria + Placozoa + Porifera   | 3B     | -     | -     | -        | -     | -     | X     | X       | X     | -         | -      | X      | -      | -      | -      |
| Porifera                                     | 3B     | -     | -     | -        | -     | -     | X     | X       | -     | -         | -      | X      | -      | -      | -      |
| Bilateria + Cnidaria + Placozoa              | 3B     | -     | -     | -        | -     | -     | X     | X       | X     | -         | -      | X      | X      | -      | -      |
| Bilateria + Cnidaria                         | 3B     | -     | -     | -        | -     | -     | X     | X       | X     | -         | -      | X      | X      | X      | -      |
| Cnidaria                                     | 3B     | -     | -     | -        | -     | -     | X     | X       | -     | -         | -      | X      | X      | X      | -      |
| Metazoa                                      | 3C     | -     | -     | -        | -     | -     | X     | X       | -     | -         | -      | X      | -      | -      | -      |
| Porifera                                     | 3C     | -     | -     | -        | -     | -     | X     | X       | -     | -         | -      | X      | -      | -      | -      |
| Bilateria + Cnidaria + Ctenophora + Placozoa | 3C     | -     | -     | -        | -     | -     | X     | X       | X     | -         | -      | X      | -      | -      | -      |
| Ctenophora                                   | 3C     | -     | -     | -        | -     | -     | X     | -       | X     | -         | -      | -      | -      | -      | -      |
| Bilateria + Cnidaria + Placozoa              | 3C     | -     | -     | -        | -     | -     | X     | X       | X     | -         | -      | X      | X      | X      | -      |
| Cnidaria                                     | 3C     | -     | -     | -        | -     | -     | X     | X       | -     | -         | -      | X      | X      | X      | -      |
| Bilateria + Placozoa                         | 3C     | -     | -     | -        | -     | -     | X     | X       | X     | -         | -      | X      | X      | X      | -      |
| Metazoa                                      | 3D     | -     | -     | -        | -     | -     | X     | X       | X     | -         | -      | X      | X      | X      | -      |
| Porifera + Cnidaria + Ctenophora + Placozoa  | 3D     | -     | -     | -        | -     | -     | X     | X       | X     | -         | -      | X      | X      | X      | -      |
| Porifera + Cnidaria + Ctenophora             | 3D     | -     | -     | -        | -     | -     | X     | X       | X     | -         | -      | X      | X      | X      | -      |
| Porifera                                     | 3D     | -     | -     | -        | -     | -     | X     | X       | -     | -         | -      | X      | -      | -      | -      |
| Cnidaria + Ctenophora                        | 3D     | -     | -     | -        | -     | -     | X     | X       | X     | -         | -      | X      | X      | X      | -      |
| Cnidaria                                     | 3D     | -     | -     | -        | -     | -     | X     | X       | -     | -         | -      | X      | X      | X      | -      |
| Ctenophora                                   | 3D     | -     | -     | -        | -     | -     | X     | -       | X     | -         | -      | -      | -      | -      | -      |

**Table S10: Inference by Dollo-like parsimony of the presence of the different subfamilies at the different nodes of the phylogenetic trees shown in Figures 2, 4 and 5.**

« X » denotes presence.

| Ancestors (nodes)        | Figure | Prdm1 | Prdm2 | Prdm3/16 | Prdm4 | Prdm5 | Prdm6 | Prdm7/9 | Prdm8 | Prdm10/15 | Prdm11 | Prdm12 | Prdm13 | Prdm14 | Prdm17 |
|--------------------------|--------|-------|-------|----------|-------|-------|-------|---------|-------|-----------|--------|--------|--------|--------|--------|
| Bilateria                | 2      | X     | X     | X        | X     | -     | X     | X       | X     | X         | -      | X      | X      | X      | -      |
| Deuterostomia            | 2      | X     | X     | X        | X     | -     | X     | X       | X     | X         | -      | X      | X      | X      | -      |
| Protostomia              | 2      | X     | X     | X        | X     | -     | -     | X       | X     | X         | -      | X      | X      | X      | -      |
| Lophotrochozoa           | 2      | X     | X     | X        | X     | -     | -     | X       | X     | X         | -      | X      | X      | X      | -      |
| Mollusca                 | 2      | X     | X     | X        | X     | -     | -     | X       | X     | X         | -      | X      | X      | X      | -      |
| Annelida                 | 2      | X     | X     | X        | X     | -     | -     | X       | X     | X         | -      | X      | X      | X      | -      |
| Platyhelmintha           | 2      | X     | -     | X        | -     | -     | -     | -       | X     | -         | -      | -      | X      | X      | -      |
| Ecdysozoa                | 4      | X     | -     | X        | X     | -     | -     | X       | X     | X         | -      | X      | X      | -      | -      |
| Nematoda                 | 4      | X     | -     | X        | -     | -     | -     | X       | X     | -         | -      | -      | X      | -      | -      |
| Rhabditina + Spirurina   | 4      | X     | -     | X        | -     | -     | -     | X       | X     | -         | -      | -      | -      | -      | -      |
| Rhabditina               | 4      | X     | -     | -        | -     | -     | -     | X       | X     | -         | -      | -      | -      | -      | -      |
| Spirurina                | 4      | X     | -     | X        | -     | -     | -     | X       | -     | -         | -      | -      | -      | -      | -      |
| Arthropoda               | 4      | X     | -     | X        | X     | -     | -     | X       | X     | X         | -      | X      | X      | -      | -      |
| Mandibulata *            | 4      | X     | -     | X        | X     | -     | -     | X       | X     | X         | -      | X      | X      | -      | -      |
| Myriochelata *           | 4      | X     | -     | X        | -     | -     | -     | -       | X     | X         | -      | X      | X      | -      | -      |
| Chelicerata / Acari      | 4      | X     | -     | X        | -     | -     | -     | -       | X     | X         | -      | X      | X      | -      | -      |
| Pancrustacea             | 4      | X     | -     | X        | -     | -     | -     | -       | X     | X         | -      | -      | X      | -      | -      |
| Hexapoda                 | 4      | X     | -     | X        | -     | -     | -     | -       | X     | X         | -      | -      | X      | -      | -      |
| Coleoptera + Mecoptera   | 4      | X     | -     | X        | -     | -     | -     | -       | X     | X         | -      | -      | X      | -      | -      |
| Hymenoptera              | 4      | X     | -     | X        | -     | -     | -     | -       | X     | X         | -      | -      | X      | -      | -      |
| Mecoptera                | 4      | X     | -     | X        | -     | -     | -     | -       | X     | -         | -      | -      | X      | -      | -      |
| Diptera                  | 4      | X     | -     | X        | -     | -     | -     | -       | X     | -         | -      | -      | X      | -      | -      |
| Lepidoptera              | 4      | X     | -     | X        | -     | -     | -     | -       | X     | -         | -      | -      | X      | -      | -      |
| Ambulacraria             | 2      | X     | X     | X        | X     | -     | X     | X       | -     | -         | -      | X      | X      | X      | -      |
| Chordata                 | 5      | X     | X     | X        | X     | -     | X     | X       | X     | X         | -      | X      | X      | X      | -      |
| Olfactores               | 5      | X     | X     | X        | X     | -     | X     | X       | X     | X         | -      | X      | X      | X      | -      |
| Urochordata              | 5      | X     | X     | X        | -     | -     | -     | X       | -     | X         | -      | -      | -      | -      | -      |
| Vertebrata               | 5      | X     | X     | X        | X     | X     | X     | X       | X     | X         | -      | X      | X      | X      | -      |
| Gnathostomata            | 5      | X     | X     | X        | X     | X     | X     | X       | X     | X         | -      | X      | X      | X      | X      |
| Euteleostomi             | 5      | X     | X     | X        | X     | X     | X     | X       | X     | X         | X      | X      | X      | X      | X      |
| Teleostei                | 5      | X     | X     | X        | X     | X     | X     | X       | X     | X         | X      | X      | X      | X      | X      |
| Euteleostei              | 5      | X     | X     | X        | X     | X     | X     | X       | X     | X         | -      | X      | X      | X      | X      |
| Sarcopterygii            | 5      | X     | X     | X        | X     | X     | X     | X       | X     | X         | X      | X      | X      | X      | X      |
| Tetrapoda                | 5      | X     | X     | X        | X     | X     | X     | X       | X     | X         | X      | X      | X      | X      | X      |
| Amniota                  | 5      | X     | X     | X        | X     | X     | X     | X       | X     | X         | X      | X      | X      | X      | X      |
| Sauropsida               | 5      | X     | X     | X        | X     | X     | X     | X       | X     | X         | X      | X      | X      | X      | X      |
| Testudines + Archosauria | 5      | X     | X     | X        | X     | X     | X     | X       | X     | X         | X      | X      | X      | X      | X      |
| Aves                     | 5      | X     | X     | X        | X     | X     | X     | -       | X     | X         | X      | X      | X      | X      | -      |

**Table S10: Inference by Dollo-like parsimony of the presence of the different subfamilies at the different nodes of the phylogenetic trees shown in Figures 2, 4 and 5.**

« X » denotes presence.

| Ancestors (nodes)                                                                                                                                      | Figure | Prdm1 | Prdm2 | Prdm3/16 | Prdm4 | Prdm5 | Prdm6 | Prdm7/9 | Prdm8 | Prdm10/15 | Prdm11 | Prdm12 | Prdm13 | Prdm14 | Prdm17 |
|--------------------------------------------------------------------------------------------------------------------------------------------------------|--------|-------|-------|----------|-------|-------|-------|---------|-------|-----------|--------|--------|--------|--------|--------|
| Mammalia                                                                                                                                               | 5      | X     | X     | X        | X     | X     | X     | X       | X     | X         | X      | X      | X      | X      | X      |
| Metatheria                                                                                                                                             | 5      | X     | X     | X        | X     | X     | X     | X       | X     | X         | X      | X      | X      | X      | -      |
| Eutheria                                                                                                                                               | 5      | X     | X     | X        | X     | X     | X     | X       | X     | X         | X      | X      | X      | X      | X      |
| Laurasiatheria                                                                                                                                         | 5      | X     | X     | X        | X     | X     | X     | X       | X     | X         | X      | X      | X      | X      | X      |
| Glires                                                                                                                                                 | 5      | X     | X     | X        | X     | X     | X     | X       | X     | X         | X      | X      | X      | X      | X      |
| Primates                                                                                                                                               | 5      | X     | X     | X        | X     | X     | X     | X       | X     | X         | X      | X      | X      | X      | X      |
| Strepsirrhini                                                                                                                                          | 5      | X     | X     | X        | X     | X     | X     | X       | X     | X         | X      | X      | X      | X      | X      |
| Haplorrhini                                                                                                                                            | 5      | X     | X     | X        | X     | X     | X     | X       | X     | X         | X      | X      | X      | X      | X      |
| Simiiformes                                                                                                                                            | 5      | X     | X     | X        | X     | X     | X     | X       | X     | X         | X      | X      | X      | X      | X      |
| Mandibulata and Myriochelata, denoted by asterisks, correspond to groups found in the two alternative arthropod phylogenies described in the main text |        |       |       |          |       |       |       |         |       |           |        |        |        |        |        |

**Table S11: Probability of the presence of the different subfamilies at the different nodes of the phylogenetic trees shown in Figure 3, defined by the ML approach.**

| Ancestors (nodes)                                   | Figure | Prdm1      | Prdm2      | Prdm3/16   | Prdm4      | Prdm5      | Prdm6      | Prdm7/9    | Prdm8      | Prdm10/15  | Prdm11     | Prdm12     | Prdm13     | Prdm14     | Prdm17     |
|-----------------------------------------------------|--------|------------|------------|------------|------------|------------|------------|------------|------------|------------|------------|------------|------------|------------|------------|
| <b>Metazoa</b>                                      | 3A     | 0.03699448 | 0.03509618 | 0.03699448 | 0.03693012 | 0.00205556 | 0.98095746 | 0.84210623 | 0.09724279 | 0.03699512 | 0.00177285 | 0.96438335 | 0.37953409 | 0.10008033 | 0.00183208 |
| <b>Porifera</b>                                     | 3A     | 0.00391891 | 0.00372961 | 0.00391891 | 0.00391249 | 0.00043469 | 0.99961392 | 0.84248673 | 0.00992706 | 0.00391897 | 0.0004065  | 0.95030556 | 0.03807803 | 0.01021003 | 0.00041241 |
| <b>Bilateria + Cnidaria + Ctenophora + Placozoa</b> | 3A     | 0.09393005 | 0.08893818 | 0.09393005 | 0.09376081 | 0.00205312 | 0.9762763  | 0.86545008 | 0.25236162 | 0.09393173 | 0.0013097  | 0.99964614 | 0.99468718 | 0.25982336 | 0.00146545 |
| <b>Bilateria + Cnidaria + Ctenophora</b>            | 3A     | 0.3261775  | 0.30868858 | 0.3261775  | 0.32558456 | 0.00428837 | 0.99916788 | 0.99532228 | 0.88123956 | 0.3261834  | 0.00168381 | 0.99966742 | 0.99974481 | 0.90738162 | 0.00222949 |
| <b>Cnidaria + Ctenophora</b>                        | 3A     | 0.09469373 | 0.08966142 | 0.09469372 | 0.09452311 | 0.00207248 | 0.9999755  | 0.98976568 | 0.8614147  | 0.09469542 | 0.00132304 | 0.96728209 | 0.99311905 | 0.88335546 | 0.00148005 |
| <b>Cnidaria</b>                                     | 3A     | 0.02298172 | 0.02179445 | 0.02298172 | 0.02294146 | 0.00112965 | 0.99998242 | 0.99989755 | 0.20387363 | 0.02298212 | 0.00095284 | 0.965691   | 0.99992543 | 0.89904992 | 0.00098988 |
| <b>Ctenophora</b>                                   | 3A     | 0.01930392 | 0.01830534 | 0.01930392 | 0.01927007 | 0.00092481 | 0.99998256 | 0.19691573 | 0.88186913 | 0.01930426 | 0.00077609 | 0.19245424 | 0.19758115 | 0.17580043 | 0.00080725 |
|                                                     |        |            |            |            |            |            |            |            |            |            |            |            |            |            |            |
| <b>Metazoa</b>                                      | 3B     | 0.01242268 | 0.01184309 | 0.01242268 | 0.01240299 | 0.00205613 | 0.99609668 | 0.32962442 | 0.44121944 | 0.01242287 | 0.00197478 | 0.39034837 | 0.13042805 | 0.03527473 | 0.00199182 |
| <b>Ctenophora</b>                                   | 3B     | 0.00297863 | 0.00286362 | 0.00297863 | 0.00297472 | 0.00092157 | 0.99995059 | 0.06592192 | 0.44874174 | 0.00297867 | 0.00090542 | 0.07797156 | 0.02639479 | 0.00751323 | 0.0009088  |
| <b>Bilateria + Cnidaria + Placozoa + Porifera</b>   | 3B     | 0.02694512 | 0.02552422 | 0.02694512 | 0.02689687 | 0.00153083 | 0.99974814 | 0.80458695 | 0.38679769 | 0.0269456  | 0.00133138 | 0.95345588 | 0.31624339 | 0.08296851 | 0.00137316 |
| <b>Porifera</b>                                     | 3B     | 0.00291676 | 0.00277506 | 0.00291676 | 0.00291194 | 0.00038236 | 0.99995686 | 0.80940381 | 0.03880238 | 0.0029168  | 0.00036247 | 0.94067017 | 0.03176648 | 0.00850358 | 0.00036664 |
| <b>Bilateria + Cnidaria + Placozoa</b>              | 3B     | 0.08193686 | 0.07745576 | 0.08193685 | 0.08178468 | 0.00178769 | 0.99126526 | 0.83649923 | 0.3974858  | 0.08193837 | 0.00115867 | 0.9995823  | 0.99429825 | 0.25861809 | 0.00129043 |
| <b>Bilateria + Cnidaria</b>                         | 3B     | 0.30518117 | 0.28833629 | 0.30518117 | 0.30460914 | 0.00389262 | 0.99965011 | 0.99861146 | 0.50547173 | 0.30518686 | 0.00152806 | 0.99989586 | 0.99993468 | 0.96934326 | 0.00202336 |
| <b>Cnidaria</b>                                     | 3B     | 0.07264187 | 0.06866767 | 0.07264186 | 0.07250691 | 0.00155908 | 0.99997971 | 0.99997108 | 0.11989627 | 0.07264321 | 0.00100121 | 0.99158763 | 0.99998208 | 0.96732765 | 0.00111807 |
|                                                     |        |            |            |            |            |            |            |            |            |            |            |            |            |            |            |
| <b>Metazoa</b>                                      | 3C     | 0.01285659 | 0.01221514 | 0.01285659 | 0.01283475 | 0.00192942 | 0.99618424 | 0.86317438 | 0.24957754 | 0.01285681 | 0.00184802 | 0.86317571 | 0.12739516 | 0.11234068 | 0.00186506 |
| <b>Porifera</b>                                     | 3C     | 0.0015118  | 0.00144784 | 0.0015118  | 0.00150963 | 0.00042211 | 0.99989182 | 0.86106374 | 0.02511835 | 0.00151183 | 0.00041399 | 0.86106491 | 0.01293395 | 0.01143267 | 0.00041569 |
| <b>Bilateria + Cnidaria + Ctenophora + Placozoa</b> | 3C     | 0.03045599 | 0.02876921 | 0.03045599 | 0.03039855 | 0.00172142 | 0.99994419 | 0.88857184 | 0.65294776 | 0.03045656 | 0.00150736 | 0.88857331 | 0.33165163 | 0.29206369 | 0.00155218 |
| <b>Ctenophora</b>                                   | 3C     | 0.00655703 | 0.00622232 | 0.00655703 | 0.00654564 | 0.00085515 | 0.99998231 | 0.17683553 | 0.71659824 | 0.00655715 | 0.00081267 | 0.17683582 | 0.06632419 | 0.05846863 | 0.00082157 |
| <b>Bilateria + Cnidaria + Placozoa</b>              | 3C     | 0.08849022 | 0.08341698 | 0.08849022 | 0.08831744 | 0.00206678 | 0.99970789 | 0.99541407 | 0.64242676 | 0.08849194 | 0.00142294 | 0.99541575 | 0.9943804  | 0.87531386 | 0.00155776 |
| <b>Cnidaria</b>                                     | 3C     | 0.02151813 | 0.0203212  | 0.02151813 | 0.02147737 | 0.00112831 | 0.99998019 | 0.9999445  | 0.15220797 | 0.02151853 | 0.00097641 | 0.98803024 | 0.99993591 | 0.89266456 | 0.00100822 |
| <b>Bilateria + Placozoa</b>                         | 3C     | 0.26783477 | 0.25230275 | 0.26783477 | 0.26730582 | 0.00324412 | 0.96775682 | 0.9880247  | 0.68775595 | 0.26784004 | 0.00127298 | 0.99994447 | 0.9999359  | 0.89206208 | 0.00168574 |
|                                                     |        |            |            |            |            |            |            |            |            |            |            |            |            |            |            |
| <b>Metazoa</b>                                      | 3D     | 0.42517553 | 0.40525089 | 0.42517553 | 0.42497205 | 0.0065133  | 0.93074576 | 0.97671828 | 0.56048409 | 0.42519029 | 0.00256549 | 0.99618204 | 0.99576773 | 0.63189239 | 0.00339345 |
| <b>Porifera + Cnidaria + Ctenophora + Placozoa</b>  | 3D     | 0.10930606 | 0.1042171  | 0.10930606 | 0.10925409 | 0.00237539 | 0.93667552 | 0.9695272  | 0.39272975 | 0.10930983 | 0.00136708 | 0.99988613 | 0.99923593 | 0.43625248 | 0.00157855 |
| <b>Porifera + Cnidaria + Ctenophora</b>             | 3D     | 0.03123772 | 0.02982068 | 0.03123772 | 0.03122325 | 0.0014624  | 0.99944615 | 0.99147808 | 0.36145258 | 0.03123877 | 0.00118163 | 0.9971266  | 0.96858931 | 0.3970599  | 0.00124052 |
| <b>Porifera</b>                                     | 3D     | 0.00334483 | 0.00320352 | 0.00334483 | 0.00334338 | 0.00037554 | 0.99995135 | 0.97419655 | 0.03627488 | 0.00334493 | 0.00034754 | 0.97917718 | 0.09682045 | 0.03982575 | 0.00035341 |
| <b>Cnidaria + Ctenophora</b>                        | 3D     | 0.00982696 | 0.00941921 | 0.00982696 | 0.00982279 | 0.00125933 | 0.99997783 | 0.98685082 | 0.38943381 | 0.00982726 | 0.00117854 | 0.96497141 | 0.96949549 | 0.41925828 | 0.00119548 |
| <b>Cnidaria</b>                                     | 3D     | 0.00295916 | 0.00286296 | 0.00295916 | 0.00295818 | 0.00093781 | 0.99998244 | 0.99987332 | 0.09251953 | 0.00295923 | 0.00091875 | 0.96385623 | 0.99972906 | 0.53053827 | 0.00092275 |
| <b>Ctenophora</b>                                   | 3D     | 0.00246355 | 0.00238264 | 0.00246355 | 0.00246273 | 0.00076345 | 0.99998258 | 0.19633733 | 0.50768652 | 0.00246361 | 0.00074742 | 0.19199573 | 0.19289345 | 0.08370824 | 0.00075078 |



**Table S12: Probability of the presence of the different subfamilies at the different nodes of the phylogenetic trees shown in Figures 2, 4 and 5, defined by the ML approach.**

| Ancestors (nodes)                                                                                                                                      | Figure   | Prdm1      | Prdm2      | Prdm3/16   | Prdm4      | Prdm5      | Prdm6      | Prdm7/9    | Prdm8      | Prdm10/15  | Prdm11     | Prdm12     | Prdm13     | Prdm14     | Prdm17     |
|--------------------------------------------------------------------------------------------------------------------------------------------------------|----------|------------|------------|------------|------------|------------|------------|------------|------------|------------|------------|------------|------------|------------|------------|
| <b>Metatheria</b>                                                                                                                                      | <b>5</b> | 0.99998248 | 0.99998248 | 0.99998248 | 0.99998248 | 0.99998248 | 0.99998248 | 0.99331201 | 0.99998248 | 0.99998248 | 0.99998248 | 0.99998248 | 0.99998248 | 0.99998248 | 0.22920806 |
| <b>Eutheria</b>                                                                                                                                        | <b>5</b> | 0.99998247 | 0.99998247 | 0.99998247 | 0.99998247 | 0.99998247 | 0.99998247 | 0.99998201 | 0.99998247 | 0.99998247 | 0.99998247 | 0.99998247 | 0.99998247 | 0.99998247 | 0.99972323 |
| <b>Laurasiatheria</b>                                                                                                                                  | <b>5</b> | 1          | 1          | 1          | 1          | 1          | 1          | 0.99999982 | 1          | 1          | 1          | 1          | 1          | 1          | 1          |
| <b>Glires</b>                                                                                                                                          | <b>5</b> | 0.99998247 | 0.99998247 | 0.99998247 | 0.99998247 | 0.99998247 | 0.99998247 | 0.99992654 | 0.99998244 | 0.99998247 | 0.99998247 | 0.99998247 | 0.99998247 | 0.99998247 | 0.99997903 |
| <b>Primates</b>                                                                                                                                        | <b>5</b> | 0.99998233 | 0.99998233 | 0.99998233 | 0.99998233 | 0.99998233 | 0.99991264 | 0.99991205 | 0.99956542 | 0.99998233 | 0.99998233 | 0.99990976 | 0.99990976 | 0.99998233 | 0.99998233 |
| <b>Strepsirrhini</b>                                                                                                                                   | <b>5</b> | 0.99998262 | 0.99998262 | 0.99998262 | 0.99998262 | 0.99998262 | 0.99166917 | 0.99998204 | 0.9913939  | 0.99998262 | 0.99998262 | 0.99998202 | 0.99998202 | 0.99998262 | 0.99998262 |
| <b>Haplorrhini</b>                                                                                                                                     | <b>5</b> | 0.99998247 | 0.99998247 | 0.99998247 | 0.99998247 | 0.99998247 | 0.99998189 | 0.99159992 | 0.99132468 | 0.99998247 | 0.99998247 | 0.99132469 | 0.99132469 | 0.99998247 | 0.99998247 |
| <b>Simiiformes</b>                                                                                                                                     | <b>5</b> | 0.99998248 | 0.99998248 | 0.99998248 | 0.99998248 | 0.99998248 | 0.99998245 | 0.99991279 | 0.9999105  | 0.99998248 | 0.99998247 | 0.99956617 | 0.99956617 | 0.99998248 | 0.99998248 |
| Mandibulata and Myriochelata, denoted by asterisks, correspond to groups found in the two alternative arthropod phylogenies described in the main text |          |            |            |            |            |            |            |            |            |            |            |            |            |            |            |



**Table S13: Character matrix used to position gene duplications.**

| Taxon \ Character                    | Prdm1 | Prdm2 | Prdm3/16 | Prdm7/9 | Prdm8 | Prdm10/15 | Prdm12 |
|--------------------------------------|-------|-------|----------|---------|-------|-----------|--------|
| <i>Saccoglossus kowalevskii</i>      | 0     | 2     | 0        | 0       | 0     | 1         | 0      |
| <i>Strongylocentrotus purpuratus</i> | 1     | 1     | 1        | 3       | 0     | 1         | 1      |
| <i>Branchiostoma floridae</i>        | 1     | 1     | 1        | 1       | 0     | 1         | 1      |
| <i>Ciona intestinalis</i>            | 2     | 0     | 2        | 1       | 0     | 1         | 0      |
| <i>Ciona savignyi</i>                | 1     | 1     | 1        | 0       | 0     | 1         | 0      |
| <i>Petromyzon marinus</i>            | 1     | 0     | 1        | 2       | 1     | 1         | 0      |
| <i>Callorhynchus milii</i>           | 2     | 1     | 2        | 0       | 2     | 2         | 1      |
| <i>Danio rerio</i>                   | 2     | 2     | 2        | 1       | 3     | 1         | 1      |
| <i>Takifugu rubripes</i>             | 3     | 2     | 2        | 1       | 1     | 2         | 2      |
| <i>Gasterosteus aculeatus</i>        | 3     | 1     | 2        | 0       | 1     | 2         | 1      |
| <i>Xiphophorus maculatus</i>         | 3     | 1     | 2        | 0       | 1     | 2         | 2      |
| <i>Oreochromis niloticus</i>         | 3     | 2     | 2        | 1       | 1     | 2         | 2      |
| <i>Oryzias latipes</i>               | 3     | 2     | 2        | 1       | 2     | 2         | 2      |
| <i>Latimeria chalumnae</i>           | 2     | 1     | 2        | 0       | 1     | 2         | 1      |
| <i>Xenopus tropicalis</i>            | 1     | 1     | 2        | 1       | 1     | 2         | 1      |
| <i>Anolis carolinensis</i>           | 1     | 0     | 2        | 0       | 1     | 2         | 0      |
| <i>Pelodiscus sinensis</i>           | 1     | 1     | 2        | 1       | 1     | 2         | 1      |
| <i>Gallus gallus</i>                 | 1     | 1     | 2        | 0       | 1     | 2         | 1      |
| <i>Taeniopygia guttata</i>           | 1     | 1     | 2        | 0       | 1     | 2         | 1      |
| <i>Ornithorhynchus anatinus</i>      | 1     | 1     | 1        | 1       | 1     | 2         | 1      |
| <i>Sarcophilus harrisii</i>          | 1     | 1     | 1        | 0       | 1     | 2         | 1      |
| <i>Monodelphis domestica</i>         | 1     | 1     | 2        | 1       | 1     | 2         | 1      |
| <i>Macropus eugenii</i>              | 1     | 1     | 2        | 0       | 1     | 2         | 1      |
| <i>Ailuropoda melanoleuca</i>        | 1     | 1     | 2        | 1       | 1     | 2         | 1      |
| <i>Canis lupus familiaris</i>        | 1     | 1     | 2        | 0       | 1     | 2         | 1      |
| <i>Mustela putorius furo</i>         | 1     | 1     | 2        | 1       | 1     | 2         | 1      |
| <i>Felis catus</i>                   | 1     | 1     | 2        | 1       | 1     | 2         | 1      |
| <i>Myotis lucifugus</i>              | 1     | 1     | 2        | 1       | 1     | 2         | 1      |
| <i>Sus scrofa</i>                    | 1     | 1     | 2        | 1       | 1     | 2         | 1      |
| <i>Bos taurus</i>                    | 1     | 1     | 2        | 1       | 1     | 2         | 1      |
| <i>Equus caballus</i>                | 1     | 1     | 2        | 0       | 1     | 2         | 1      |
| <i>Loxodonta africana</i>            | 1     | 1     | 2        | 1       | 1     | 2         | 1      |
| <i>Cavia porcellus</i>               | 1     | 1     | 2        | 0       | 1     | 2         | 1      |
| <i>Ictidomys tridecemlineatus</i>    | 1     | 1     | 2        | 0       | 1     | 2         | 1      |
| <i>Rattus norvegicus</i>             | 1     | 1     | 2        | 1       | 1     | 2         | 1      |
| <i>Mus musculus</i>                  | 1     | 1     | 2        | 1       | 1     | 2         | 1      |
| <i>Oryctolagus cuniculus</i>         | 1     | 1     | 2        | 1       | 1     | 2         | 1      |
| <i>Microcebus murinus</i>            | 1     | 1     | 2        | 1       | 0     | 2         | 1      |
| <i>Otolemur garnettii</i>            | 1     | 1     | 2        | 1       | 1     | 2         | 1      |
| <i>Tarsius syrichta</i>              | 1     | 1     | 2        | 0       | 0     | 2         | 0      |
| <i>Callithrix jacchus</i>            | 1     | 1     | 2        | 2       | 1     | 2         | 1      |
| <i>Macaca mulatta</i>                | 1     | 1     | 2        | 2       | 1     | 2         | 0      |
| <i>Nomascus leucogenys</i>           | 1     | 1     | 2        | 1       | 1     | 2         | 1      |
| <i>Gorilla gorilla</i>               | 1     | 1     | 2        | 2       | 1     | 2         | 1      |
| <i>Pongo abelii</i>                  | 1     | 1     | 2        | 2       | 1     | 2         | 1      |
| <i>Pan troglodytes</i>               | 1     | 1     | 2        | 2       | 1     | 2         | 1      |
| <i>Homo sapiens</i>                  | 1     | 1     | 2        | 2       | 1     | 2         | 1      |
| <i>Crassostrea gigas</i>             | 1     | 0     | 2        | 0       | 0     | 1         | 1      |

**Table S13: Character matrix used to position gene duplications.**

|                                   |   |   |   |   |   |   |   |
|-----------------------------------|---|---|---|---|---|---|---|
| <i>Lottia gigantea</i>            | 1 | 2 | 1 | 1 | 1 | 1 | 1 |
| <i>Pinctada fucata</i>            | 0 | 0 | 2 | 1 | 1 | 1 | 0 |
| <i>Platynereis dumerilii</i>      | 2 | 0 | 1 | 2 | 1 | 1 | 1 |
| <i>Capitella teleta</i>           | 1 | 2 | 1 | 0 | 1 | 1 | 0 |
| <i>Helobdella robusta</i>         | 2 | 0 | 2 | 0 | 0 | 1 | 0 |
| <i>Adineta vaga</i>               | 2 | 0 | 3 | 0 | 1 | 0 | 0 |
| <i>Schmidtea mediterranea</i>     | 1 | 0 | 2 | 0 | 1 | 0 | 0 |
| <i>Schistosoma mansoni</i>        | 1 | 0 | 1 | 0 | 1 | 0 | 0 |
| <i>Caenorhabditis elegans</i>     | 1 | 0 | 0 | 1 | 0 | 0 | 0 |
| <i>Pristionchus pacificus</i>     | 2 | 0 | 0 | 1 | 1 | 0 | 0 |
| <i>Brugia malayi</i>              | 1 | 0 | 1 | 1 | 0 | 0 | 0 |
| <i>Loa loa</i>                    | 2 | 0 | 1 | 1 | 0 | 0 | 0 |
| <i>Wuchereria bancrofti</i>       | 1 | 0 | 1 | 1 | 0 | 0 | 0 |
| <i>Trichinella spiralis</i>       | 1 | 0 | 1 | 0 | 0 | 0 | 0 |
| <i>Metaseiulus occidentalis</i>   | 1 | 0 | 1 | 0 | 1 | 0 | 0 |
| <i>Ixodes scapularis</i>          | 0 | 0 | 1 | 0 | 1 | 1 | 1 |
| <i>Tetranychus urticae</i>        | 2 | 0 | 1 | 0 | 1 | 0 | 0 |
| <i>Strigamia maritima</i>         | 1 | 0 | 1 | 1 | 1 | 3 | 1 |
| <i>Daphnia pulex</i>              | 1 | 0 | 1 | 0 | 1 | 0 | 0 |
| <i>Pediculus humanus corporis</i> | 1 | 0 | 2 | 0 | 1 | 1 | 0 |
| <i>Acyrtosiphon pisum</i>         | 1 | 0 | 2 | 0 | 1 | 1 | 0 |
| <i>Rhodnius prolixus</i>          | 1 | 0 | 1 | 0 | 0 | 0 | 0 |
| <i>Aedes aegypti</i>              | 1 | 0 | 1 | 0 | 1 | 0 | 0 |
| <i>Culex quinquefasciatus</i>     | 1 | 0 | 3 | 0 | 1 | 0 | 0 |
| <i>Drosophila melanogaster</i>    | 1 | 0 | 2 | 0 | 1 | 0 | 0 |
| <i>Ceratitis capitata</i>         | 1 | 0 | 1 | 0 | 1 | 0 | 0 |
| <i>Atta cephalotes</i>            | 1 | 0 | 2 | 0 | 1 | 1 | 0 |
| <i>Megachile rotundata</i>        | 1 | 0 | 0 | 0 | 1 | 1 | 0 |
| <i>Bombus terrestris</i>          | 1 | 0 | 2 | 0 | 1 | 1 | 0 |
| <i>Bombus impatiens</i>           | 1 | 0 | 2 | 0 | 1 | 1 | 0 |
| <i>Apis mellifera</i>             | 1 | 0 | 1 | 0 | 1 | 1 | 0 |
| <i>Nasonia vitripennis</i>        | 1 | 0 | 1 | 0 | 1 | 1 | 0 |
| <i>Tribolium castaneum</i>        | 1 | 0 | 2 | 0 | 1 | 1 | 0 |
| <i>Bombyx mori</i>                | 1 | 0 | 1 | 0 | 1 | 0 | 0 |
| <i>Danaus plexippus</i>           | 1 | 0 | 2 | 0 | 1 | 0 | 0 |
| <i>Heliconius melpomene</i>       | 1 | 0 | 2 | 0 | 1 | 0 | 0 |
| <i>Trichoplax adhaerens</i>       | 0 | 0 | 0 | 0 | 0 | 0 | 1 |
| <i>Hydra magnipapillata</i>       | 0 | 0 | 0 | 2 | 0 | 0 | 0 |
| <i>Acropora digitifera</i>        | 0 | 0 | 0 | 2 | 0 | 0 | 1 |
| <i>Nematostella vectensis</i>     | 0 | 0 | 0 | 1 | 0 | 0 | 1 |
| <i>Pleurobrachia bachei</i>       | 0 | 0 | 0 | 0 | 0 | 0 | 0 |
| <i>Mnemiopsis leidyi</i>          | 0 | 0 | 0 | 0 | 1 | 0 | 0 |
| <i>Oscarella carmela</i>          | 0 | 0 | 0 | 0 | 0 | 0 | 0 |
| <i>Amphimedon queenslandica</i>   | 0 | 0 | 0 | 1 | 0 | 0 | 1 |
| <i>Sycon ciliatum</i>             | 0 | 0 | 0 | 0 | 0 | 0 | 0 |

Table S14: Inference by parsimony of the number of genes at the different nodes of the phylogenetic trees shown in Figures 2, 4 and 5.

| Ancestors (nodes)        | Figure | Prdm1 | Prdm2 | Prdm3/16 | Prdm7/9 | Prdm8 | Prdm10/15 | Prdm12 |
|--------------------------|--------|-------|-------|----------|---------|-------|-----------|--------|
| Bilateria                | 2      | 1     | 1     | 1        | 1       | 1     | 1         | 1      |
| Deuterostomia            | 2      | 1     | 1     | 1        | 1       | 1     | 1         | 1      |
| Protostomia              | 2      | 1     | 1     | 1        | 1       | 1     | 1         | 1      |
| Lophotrochozoa           | 2      | 1     | 1     | 1        | 1       | 1     | 1         | 1      |
| Mollusca                 | 2      | 1     | 1     | 1        | 1       | 1     | 1         | 1      |
| Annelida                 | 2      | 1-2   | 1     | 1        | 1       | 1     | 1         | 1      |
| Platyhelmintha           | 2      | 1     | 0     | 1        | 1       | 1     | 0         | 0      |
| Ecdysozoa                | 4      | 1     | 0     | 1        | 1       | 1     | 1         | 1      |
| Nematoda                 | 4      | 1     | 0     | 1        | 1       | 1     | 0         | 0      |
| Arthropoda               | 4      | 1     | 0     | 1        | 1       | 1     | 1         | 1      |
| Mandibulata              | 4      | 1     | 0     | 1        | 1       | 1     | 1         | 1      |
| Pancrustacea             | 4      | 1     | 0     | 1        | 0       | 1     | 1         | 0      |
| Hexapoda                 | 4      | 1     | 0     | 2        | 0       | 1     | 1         | 0      |
| Coleoptera + Mecopterida | 4      | 1     | 0     | 2        | 0       | 1     | 1         | 0      |
| Hymenoptera              | 4      | 1     | 0     | 2        | 0       | 1     | 1         | 0      |
| Mecopterida              | 4      | 1     | 0     | 2        | 0       | 1     | 0         | 0      |
| Diptera                  | 4      | 1     | 0     | 2        | 0       | 1     | 0         | 0      |
| Lepidoptera              | 4      | 1     | 0     | 2        | 0       | 1     | 0         | 0      |
| Ambulacraria             | 2      | 1     | 1     | 1        | 1       | 0     | 1         | 1      |
| Chordata                 | 5      | 1     | 1     | 1        | 1       | 1     | 1         | 1      |
| Olfactores               | 5      | 1     | 1     | 1        | 1       | 1     | 1         | 1      |
| Urochordata              | 5      | 1     | 1     | 1        | 1       | 0     | 1         | 0      |
| Vertebrata               | 5      | 1     | 1     | 1        | 1       | 1     | 1         | 1      |
| Gnathostomata            | 5      | 2     | 1     | 2        | 1       | 1     | 2         | 1      |
| Euteleostomi             | 5      | 2     | 1     | 2        | 1       | 1     | 2         | 1      |
| Teleostei                | 5      | 2     | 2     | 2        | 1       | 1     | 2         | 1      |
| Euteleostei              | 5      | 3     | 2     | 2        | 1       | 1     | 2         | 1-2    |
| Percomorpharia           | 5      | 3     | 2     | 2        | 1       | 1     | 2         | 1-2    |
| Ovalentariae             | 5      | 3     | 2     | 2        | 1       | 1     | 2         | 2      |
| Atherinomorphae          | 5      | 3     | 2     | 2        | 1       | 1     | 2         | 2      |
| Sarcopterygii            | 5      | 2     | 1     | 2        | 1       | 1     | 2         | 1      |
| Tetrapoda                | 5      | 1     | 1     | 2        | 1       | 1     | 2         | 1      |
| Amniota                  | 5      | 1     | 1     | 2        | 1       | 1     | 2         | 1      |
| Sauropsida               | 5      | 1     | 1     | 2        | 1       | 1     | 2         | 1      |
| Testudines + Archosauria | 5      | 1     | 1     | 2        | 1       | 1     | 2         | 1      |
| Aves                     | 5      | 1     | 1     | 2        | -       | 1     | 2         | 1      |
| Mammalia                 | 5      | 1     | 1     | 2        | 1       | 1     | 2         | 1      |
| Metatheria               | 5      | 1     | 1     | 2        | 1       | 1     | 2         | 1      |
| Eutheria                 | 5      | 1     | 1     | 2        | 1       | 1     | 2         | 1      |
| Laurasiatheria           | 5      | 1     | 1     | 2        | 1       | 1     | 2         | 1      |
| Glires                   | 5      | 1     | 1     | 2        | 1       | 1     | 2         | 1      |
| Primates                 | 5      | 1     | 1     | 2        | 1       | 1     | 2         | 1      |
| Strepsirrhini            | 5      | 1     | 1     | 2        | 1       | 1     | 2         | 1      |
| Haplorrhini              | 5      | 1     | 1     | 2        | 1-2     | 1     | 2         | 1      |
| Simiiformes              | 5      | 1     | 1     | 2        | 2       | 1     | 2         | 1      |

Table S15: Probability of the presence of two (or three for Prdm1) genes at the different nodes of the phylogenetic trees shown in Figures 2, 4 and 5.

| Ancestors (nodes)        | Figure | Prdm1#                   | Prdm2       | Prdm3/16    | Prdm7/9    | Prdm8       | Prdm10/15   | Prdm12           |
|--------------------------|--------|--------------------------|-------------|-------------|------------|-------------|-------------|------------------|
| Bilateria                | 2      | 0,00183491<br>0,00106498 | 0,0184791   | 0,00302886  | 0,00210661 | 0,00045628  | 0,00045801  | 0,00085916       |
| Deuterostomia            | 2      | 0,00056849<br>0,00027078 | 0,02913959  | 0,00169603  | 0,00724813 | 0,00005245  | 0,00044828  | 0,00173432       |
| Protostomia              | 2      | 0,00275717<br>0,00018544 | 0,00012121  | 0,00128748  | 0,00054746 | 0,00115726  | 0,00005409  | 0,00033452       |
| Lophotrochozoa           | 2      | 0,02104596<br>0,00002163 | 0,00000026  | 0,0054619   | 0,00019715 | 0,00000041  | 0,00000098  | 0,00290701       |
| Mollusca                 | 2      | 0,00176366<br>0,00013524 | 0,03210572  | 0,04790633  | 0,0054979  | 0,00006314  | 0,00042125  | 0,00425117       |
| Annelida                 | 2      | 0,50920865<br>0,0013424* | 0,00103308  | 0,00495125  | 0,06219625 | 0,00006314  | 0,00042125  | 0,00301289       |
| Platyhelmintha           | 2      | 0,00065118<br>0,00004773 | 0,00003328  | 0,004999417 | 0,00025373 | 0,00000215  | 0,00002642  | 0,0001745        |
| Ecdysozoa                | 4      | 0,00076266<br>0,00005646 | 0,00004051  | 0,00022261  | 0,00095363 | 0,00116112  | 0,00002439  | 0,00026337       |
| Nematoda                 | 4      | 0,00135424<br>0,00006853 | 0,00003574  | 0,00033296  | 0,00396441 | 0,000466429 | 0,00000105  | 0,00019389       |
| Arthropoda               | 4      | 0,00313489<br>0,00021744 | 0,00003692  | 0,00022439  | 0,00096658 | 0,00043106  | 0,00007552  | 0,000062496      |
| Mandibulata              | 4      | 0,00112631<br>0,00003995 | 0,00003552  | 0,00198633  | 0,00418127 | 0,00004477  | 0,00119572  | 0,00321659       |
| Pancrustacea             | 4      | 0,00003242<br>0,00002994 | 0,00003437  | 0,00189643  | 0,00073771 | 0,00002307  | 0,00117155  | 0,00049831       |
| Hexapoda                 | 4      | 0,00000097<br>0,00000096 | 0,0000112   | 0,84603842  | 0,00002185 | 0,00000187  | 0,00002834  | 0,00001252       |
| Coleoptera + Mecopterida | 4      | 0,00003053<br>0,00003053 | 0,00003555  | 0,95556913  | 0,00027909 | 0,00002279  | 0,00044761  | 0,00018737       |
| Hymenoptera              | 4      | 0,0000305<br>0,0000305   | 0,00003551  | 0,79158207  | 0,00027894 | 0,00002277  | 0,00001867  | 0,00018722       |
| Mecopterida              | 4      | 0,00003155<br>0,00003155 | 0,00003555  | 0,93448252  | 0,00027744 | 0,00002277  | 0,00044104  | 0,00018659       |
| Diptera                  | 4      | 0,00003149<br>0,00003149 | 0,00003676  | 0,6688644   | 0,00021912 | 0,00002344  | 0,000002823 | 0,000019852      |
| Lepidoptera              | 4      | 0,0000305<br>0,0000305   | 0,00003575  | 0,96588107  | 0,00027749 | 0,00002277  | 0,00002767  | 0,00018662       |
| Ambulacraria             | 2      | 0,00109458<br>0,00099935 | 0,10518829  | 0,00266017  | 0,00703302 | 0,00002353  | 0,00002718  | 0,0034251        |
| Chordata                 | 5      | 0,00193214<br>0,00013431 | 0,00225962  | 0,00485626  | 0,01676676 | 0,00000873  | 0,00005349  | 0,0035968        |
| Olfactores               | 5      | 0,02931089<br>0,00025401 | 0,00069432  | 0,04914826  | 0,03637959 | 0,00150248  | 0,00046561  | 0,00178834       |
| Urochordata              | 5      | 0,05734377<br>0,00099283 | 0,00123053  | 0,08991445  | 0,01548407 | 0,0275501   | 0,00001876  | 0,00054069       |
| Vertebrata               | 5      | 0,05414754<br>0,00100237 | 0,00224634  | 0,08769     | 0,1659243  | 0,08041868  | 0,02012702  | 0,00354918       |
| Gnathostomata            | 5      | 0,89579788<br>0,00316663 | 0,00574477  | 0,9530363   | 0,04514214 | 0,00568519  | 0,95888692  | 0,00408455       |
| Euteleostomi             | 5      | 0,91804946<br>0,00689188 | 0,03813233  | 0,9971344   | 0,01168832 | 0,00296474  | 0,97887004  | 0,00439803       |
| Teleostei                | 5      | 0,91533961<br>0,05717579 | 0,91474863  | 0,99952626  | 0,0029833  | 0,000026042 | 0,95797237  | 0,003086977      |
| Euteleostei              | 5      | 0,02887929<br>0,96846063 | 0,94178242  | 0,99963164  | 0,0016078  | 0,002795474 | 0,99903575  | 0,50004181 ***   |
| Percomorpha              | 5      | 0,0008851<br>0,99892614  | 0,91344696  | 0,99967233  | 0,00415942 | 0,00002938  | 0,99995187  | 0,499993315 **** |
| Ovalentariae             | 5      | 0,00091284<br>0,99889244 | 0,96990329  | 0,99965567  | 0,00117847 | 0,00093114  | 0,99995083  | 0,97095444       |
| Atherinomorphae          | 5      | 0,00005573<br>0,99987962 | 0,93975973  | 0,9996735   | 0,00401457 | 0,0279422   | 0,99997139  | 0,99808735       |
| Sarcopterygii            | 5      | 0,89484469<br>0,00320632 | 0,0012682   | 0,99951469  | 0,00710224 | 0,00020455  | 0,9951131   | 0,00043693       |
| Tetrapoda                | 5      | 0,02738657<br>0,00093911 | 0,00008217  | 0,9994904   | 0,00357304 | 0,00002802  | 0,99996115  | 0,0002324        |
| Amniota                  | 5      | 0,00089551<br>0,00008651 | 0,00010901  | 0,99663237  | 0,00384933 | 0,00002361  | 0,99997033  | 0,00054911       |
| Sauropsida               | 5      | 0,05734377<br>0,00099283 | 0,000106943 | 0,99950194  | 0,00520233 | 0,00002274  | 0,99997117  | 0,00320005       |
| Testudines + Archosauria | 5      | 0,00003128<br>0,00003052 | 0,00010175  | 0,99964907  | 0,0055601  | 0,0002275   | 0,99997121  | 0,00051479       |
| Aves                     | 5      | 0,00002954<br>0,00002952 | 0,00003742  | 0,99967318  | 0,00201811 | 0,0000221   | 0,99997182  | 0,00020136       |
| Mammalia                 | 5      | 0,00005707<br>0,00003308 | 0,00003901  | 0,94365678  | 0,00132615 | 0,00002281  | 0,99997116  | 0,0002168        |

**Table S15: Probability of the presence of two (or three for Prdm1) genes at the different nodes of the phylogenetic trees shown in Figures 2, 4 and 5.**

| Ancestors (nodes) | Figure | Prdm1#                                                                                                                              | Prdm2      | Prdm3/16   | Prdm7/9        | Prdm8       | Prdm10/15  | Prdm12     |
|-------------------|--------|-------------------------------------------------------------------------------------------------------------------------------------|------------|------------|----------------|-------------|------------|------------|
| Metatheria        | 5      | 0,00003053<br>0,00003051                                                                                                            | 0,00003552 | 0,99465144 | 0,00399135     | 0,00002277  | 0,99997119 | 0,03086977 |
| Eutheria          | 5      | 0,00003056<br>0,00003054                                                                                                            | 0,00003556 | 0,99938604 | 0,0003905      | 0,00002285  | 0,99997118 | 0,00018674 |
| Laurasiatheria    | 5      | 0,00000003<br>0,00000003                                                                                                            | 0,00000004 | 0,9999992  | 0,0000194      | 0,00000002  | 0,9999999  | 0,0000006  |
| Glires            | 5      | 0,00003057<br>0,00003057                                                                                                            | 0,00003559 | 0,99965414 | 0,0010387      | 0,000002419 | 0,99997116 | 0,00019149 |
| Primates          | 5      | 0,00003152<br>0,00003152                                                                                                            | 0,00003672 | 0,99963745 | 0,02256399     | 0,00018946  | 0,99997055 | 0,00070885 |
| Strepsirrhini     | 5      | 0,00002955<br>0,00002955                                                                                                            | 0,00003431 | 0,99967261 | 0,00164649     | 0,00081419  | 0,99997181 | 0,00021953 |
| Haplorrhini       | 5      | 0,00003053<br>0,00003053                                                                                                            | 0,0000355  | 0,99965507 | 0,311224865 ** | 0,00083615  | 0,99997118 | 0,00347271 |
| Simiiformes       | 5      | 0,0000305<br>0,0000305                                                                                                              | 0,00003551 | 0,99965597 | 0,92958496     | 0,00008714  | 0,99997119 | 0,00135226 |
|                   |        | # For Prdm1, the first number indicates the probability to have two genes and the second number the probability to have three genes |            |            |                |             |            |            |
|                   |        | * Probability of the presence of a single gene: 0,48810048                                                                          |            |            |                |             |            |            |
|                   |        | ** Probability of the presence of a single gene: 0,3124865; Probability of the absence of the subfamily: 0,34018363                 |            |            |                |             |            |            |
|                   |        | *** Probability of the presence of a single gene: 0,4952612                                                                         |            |            |                |             |            |            |
|                   |        | **** Probability of the presence of a single gene: 0,49566259                                                                       |            |            |                |             |            |            |

**Table S16: Summary of the performed AU tests.**

| Subfamilies      | Hypotheses                                                                                                                                                                                                                                        | P-value      | Rejected   |
|------------------|---------------------------------------------------------------------------------------------------------------------------------------------------------------------------------------------------------------------------------------------------|--------------|------------|
| <b>Prdm1</b>     | Teleost sequences form a monophyletic group                                                                                                                                                                                                       | 0,42         | no         |
|                  | Sarcopterygian sequences form a monophyletic group                                                                                                                                                                                                | 0,23         | no         |
|                  | Both teleost and sarcopterygian sequences form a monophyletic group                                                                                                                                                                               | 0,20         | no         |
|                  | Teleost <i>Prdm1a</i> and <i>Prdm1b</i> sequences do not form a monophyletic group; teleost <i>Prdm1a</i> sequences and tetrapod sequences form a monophyletic group                                                                              | <b>0,008</b> | <b>yes</b> |
|                  | Teleost <i>Prdm1a</i> and <i>Prdm1b</i> sequences do not form a monophyletic group; teleost <i>Prdm1b</i> sequences and tetrapod sequences form a monophyletic group                                                                              | <b>0,025</b> | <b>yes</b> |
| <b>Prdm2</b>     | Teleost <i>Prdm2a</i> and <i>Prdm2b</i> sequences do not form a monophyletic group; teleost <i>Prdm2a</i> sequences and other vertebrate sequences form a monophyletic group                                                                      | <b>0,004</b> | <b>yes</b> |
|                  | Teleost <i>Prdm2a</i> and <i>Prdm2b</i> sequences do not form a monophyletic group; teleost <i>Prdm2b</i> sequences and other vertebrate sequences form a monophyletic group                                                                      | <b>0,006</b> | <b>yes</b> |
| <b>Prdm3/16</b>  | <i>Pmar_prdm3_16</i> is included in the vertebrate Prdm3 group                                                                                                                                                                                    | <b>0,001</b> | <b>yes</b> |
|                  | <i>Pmar_prdm3_16</i> is included in the vertebrate Prdm16 group                                                                                                                                                                                   | <b>0,004</b> | <b>yes</b> |
|                  | <i>Dpul_prdm3_16</i> is included in the hexapod Prdm3_16b group                                                                                                                                                                                   | <b>0,012</b> | <b>yes</b> |
|                  | <i>Dpul_prdm3_16</i> is found as outgroup to the hexapod Prdm3_16a + Prdm3_16b group                                                                                                                                                              | <b>0,025</b> | <b>yes</b> |
|                  | Hymenopteran <i>Prdm3_16a1</i> sequences are included in the hexapod Prdm3_16b group                                                                                                                                                              | <b>0,018</b> | <b>yes</b> |
|                  | Hymenopteran <i>Prdm3_16a2</i> sequences are included in the hexapod Prdm3_16b group                                                                                                                                                              | <b>0,022</b> | <b>yes</b> |
| <b>Prdm7/9</b>   | Primate <i>Prdm7</i> sequences form a monophyletic group; Primate <i>Prdm7</i> + <i>Prdm9</i> sequences is not a monophyletic group                                                                                                               | 0,12         | no         |
|                  | Primate <i>Prdm9</i> sequences form a monophyletic group; Primate <i>Prdm7</i> + <i>Prdm9</i> sequences is not a monophyletic group                                                                                                               | 0,29         | no         |
|                  | Primate <i>Prdm7</i> sequences form a monophyletic group; Primate <i>Prdm7</i> + <i>Prdm9</i> sequences sequences is a monophyletic group                                                                                                         | 0,14         | no         |
|                  | Primate <i>Prdm9</i> sequences form a monophyletic group; Primate <i>Prdm7</i> + <i>Prdm9</i> sequences sequences is a monophyletic group                                                                                                         | 0,09         | no         |
|                  | Both primate <i>Prdm7</i> and <i>Prdm9</i> sequences form monophyletic groups; Primate <i>Prdm7</i> + <i>Prdm9</i> sequences sequences is a monophyletic group                                                                                    | 0,10         | no         |
| <b>Prdm8</b>     | Teleost sequences form a monophyletic group                                                                                                                                                                                                       | <b>0,009</b> | <b>yes</b> |
|                  | The two <i>Callorhinchus</i> sequences form a monophyletic group                                                                                                                                                                                  | <b>0,011</b> | <b>yes</b> |
|                  | Both teleost and <i>Callorhinchus</i> sequences form monophyletic groups                                                                                                                                                                          | <b>0,004</b> | <b>yes</b> |
|                  | Teleost sequences (excluding <i>Drer_prdm8c</i> ) form a monophyletic group                                                                                                                                                                       | <b>0,034</b> | <b>yes</b> |
|                  | Both teleost (excluding <i>Drer_prdm8c</i> ) and <i>Callorhinchus</i> sequences form monophyletic groups                                                                                                                                          | <b>0,029</b> | <b>yes</b> |
| <b>Prdm10/15</b> | <i>Petromyzon Pmar_prdm15</i> sequence clusters with gnathostome <i>Prdm10</i> + non-vertebrate deuterostome sequences; the <i>Petromyzon</i> sequence is found as sister group to the <i>Prdm10</i> sequences                                    | <b>0,035</b> | <b>yes</b> |
|                  | <i>Petromyzon Pmar_prdm15</i> sequence clusters with gnathostome <i>Prdm10</i> + non-vertebrate deuterostome sequences; the <i>Petromyzon</i> sequence forms a monophyletic group with the <i>Branchiostoma</i> and <i>Saccoglossus</i> sequences | <b>0,039</b> | <b>yes</b> |
|                  | <i>Petromyzon Pmar_prdm15</i> sequence clusters with gnathostome <i>Prdm10</i> + non-vertebrate deuterostome sequences; the <i>Petromyzon</i> sequence forms a monophyletic group with the <i>Ciona</i> sequences                                 | <b>0,042</b> | <b>yes</b> |
| <b>Prdm12</b>    | <i>Gasterosteus Gacu_prdm12a</i> sequence is the sister group to the Euteleosti <i>Prdm12a</i> + <i>Prdm12b</i> sequences                                                                                                                         | <b>0,029</b> | <b>yes</b> |
|                  | <i>Danio Drer_prdm12</i> forms a monophyletic group with the Euteleosti <i>Prdm12a</i> sequences                                                                                                                                                  | <b>0,012</b> | <b>yes</b> |
|                  | <i>Danio Drer_prdm12</i> forms a monophyletic group with the Euteleosti <i>Prdm12b</i> sequences                                                                                                                                                  | <b>0,015</b> | <b>yes</b> |

**Table S17: Proteins from non-metazoan species with similarity to animal Prdm proteins.**

| Species names                         | Species abbreviations | Phylogenetic group                                                     | Proteins                      | Domain(s)                    | Best Blast hit in Human                                                  | E-value |
|---------------------------------------|-----------------------|------------------------------------------------------------------------|-------------------------------|------------------------------|--------------------------------------------------------------------------|---------|
| <i>Albugo laibachii</i>               | <i>Alai</i>           | Stramenopiles; Oomycetes                                               | -                             | -                            | -                                                                        | -       |
| <i>Allomyces macrogynus</i>           | <i>Amac</i>           | Opisthokonta; Fungi; Blastocladiomycota                                | AMAG_03264T0                  | 1 X zf-C2H2_4                | NP_004982 MDS1 and EVI1 complex locus protein EVI1                       | 3E-07   |
| <i>Arabidopsis thaliana</i>           | <i>Atha</i>           | Viridiplantae; Streptophyta; Streptophytina; Embryophyta; Tracheophyta | NP_196059.1                   | 2 X zf-C2H2_6                | NP_001098548 MDS1 and EVI1 complex locus protein EVI1 isoform b          | 8E-05   |
| <i>Ashbya gossypii</i>                | <i>Agos</i>           | Opisthokonta; Fungi; Dikarya; Ascomycota                               | AAS53951                      | 1 X zf-H2C2_2                | NP_071397 PR domain zinc finger protein 16 isoform 1                     | 3E-10   |
| <i>Aspergillus nidulans</i>           | <i>Anid</i>           | Opisthokonta; Fungi; Dikarya; Ascomycota                               | CADANIAP00002206              | fungal_TF_MHR                | NP_001129711 putative histone-lysine N-methyltransferase PRDM6           | 5E-05   |
| <i>Batrachochytrium dendrobatidis</i> | <i>Bden</i>           | Opisthokonta; Fungi; Chytridiomycota                                   | fgenes1_pg_C_scaffold_1000374 | 1 X zf-H2C2_2                | NP_036538 PR domain zinc finger protein 4                                | 2E-10   |
| <i>Capsaspora owczarzaki</i>          | <i>Cowc</i>           | Opisthokonta; Opisthokonta incertae sedis; Ichthyosporae               | -                             | -                            | -                                                                        | -       |
| <i>Chondrus crispus</i>               | <i>Ccri</i>           | Rhodophyta; Florideophyceae                                            | XP_005714528                  | 1 X zf-H2C2_2                | NP_001098547 MDS1 and EVI1 complex locus protein EVI1 isoform a          | 1E-11   |
|                                       |                       |                                                                        | XP_005710300                  | -                            | NP_001157472 MDS1 and EVI1 complex locus protein EVI1 isoform e          | 9E-08   |
| <i>Cryptococcus neoformans</i>        | <i>Cneo</i>           | Opisthokonta; Fungi; Dikarya; Basidiomycota                            | AAW46721                      | -                            | NP_955469 PR domain zinc finger protein 10 isoform 2                     | 5E-08   |
| <i>Cyanidioschyzon merolae</i>        | <i>Cmer</i>           | Rhodophyta; Bangiophyceae                                              | -                             | -                            | -                                                                        | -       |
| <i>Dictyostelium discoideum</i>       | <i>Ddis</i>           | Amoebozoa; Mycetozoa                                                   | DDB0220662                    | -                            | NP_071398 PR domain zinc finger protein 15 isoform 1                     | 1E-07   |
|                                       |                       |                                                                        | DDB0304751                    | IPT_PCSR                     | NP_036538 PR domain zinc finger protein 4                                | 2,27    |
|                                       |                       |                                                                        | DDB0186030                    | ADP_ribosyl_GH               | NP_001091643 probable histone-lysine N-methyltransferase PRDM7 isoform 1 | 0,35    |
| <i>Ectocarpus siliculosus</i>         | <i>Esil</i>           | Stramenopiles; PX clade; Phaeophyceae                                  | emb  CBJ2734.1                | -                            | NP_036538 PR domain zinc finger protein 4                                | 7E-02   |
|                                       |                       |                                                                        | emb  CBJ27429                 | Glo_ED1_BRP_like superfamily | XP_003120623 PR domain zinc finger protein 16-like isoform 1, partial    | 9,94    |
| <i>Emiliana huxleyi</i>               | <i>Ehux</i>           | Haptophyceae; Isochrysidales                                           | XP_005786304                  | -                            | NP_071398 PR domain zinc finger protein 15 isoform 1                     | 4E-02   |
| <i>Entamoeba histolytica</i>          | <i>Ehist</i>          | Amoebozoa; Archamoebae                                                 | -                             | -                            | -                                                                        | -       |
| <i>Fonticula alba</i>                 | <i>Falb</i>           | Opisthokonta; Nucleariidae and Fonticula group                         | -                             | -                            | -                                                                        | -       |
| <i>Fusarium oxysporum</i>             | <i>Foxy</i>           | Opisthokonta; Fungi; Dikarya; Ascomycota                               | FOXG_05245P0                  | RING superfamily             | NP_955469 PR domain zinc finger protein 10 isoform 2                     | 4E-08   |
| <i>Gaeumannomyces graminis</i>        | <i>Ggra</i>           | Opisthokonta; Fungi; Dikarya; Ascomycota                               | GGTG_10332T0                  | 1 X zf-H2C2_2                | XP_003120624 PR domain zinc finger protein 16-like isoform 2, partial    | 3E-11   |
|                                       |                       |                                                                        | GGTG_05505T0                  | 1 X zf-met                   | NP_004982 MDS1 and EVI1 complex locus protein EVI1 isoform c             | 4E-08   |
| <i>Giardia lamblia</i>                | <i>Glam</i>           | Fornicata; Diplomonadida; Hexamitidae                                  | EDO80981                      | -                            | NP_064613 PR domain zinc finger protein 10 isoform 1                     | 7E-02   |
|                                       |                       |                                                                        | EDO76536                      | -                            | NP_955469 PR domain zinc finger protein 10 isoform 2                     | 0,15    |
| <i>Gibberella moniliformis</i>        | <i>Gmon</i>           | Opisthokonta; Fungi; Dikarya; Ascomycota                               | FVEG_02887T0                  | RING superfamily             | NP_064613 PR domain zinc finger protein 10 isoform 1                     | 9E-08   |

**Table S17: Proteins from non-metazoan species with similarity to animal Prdm proteins.**

| Species names                     | Species abbreviations | Phylogenetic group                                                                              | Proteins                     | Domain(s)                   | Best Blast hit in Human                                         | E-value |
|-----------------------------------|-----------------------|-------------------------------------------------------------------------------------------------|------------------------------|-----------------------------|-----------------------------------------------------------------|---------|
| <i>Gibberella zeae</i>            | <i>Gzea</i>           | Opisthokonta; Fungi; Dikarya; Ascomycota                                                        | -                            | -                           | -                                                               | -       |
| <i>Glomerella graminicola</i>     | <i>Ggram</i>          | Opisthokonta; Fungi; Dikarya; Ascomycota                                                        | EFQ29651                     | fungal_TF_MHR + 2 X zf-C2H2 | NP_071398 PR domain zinc finger protein 15 isoform 1            | 1E-08   |
| <i>Guillardia theta</i>           | <i>Gthe</i>           | Cryptophyta; Pyrenomonadales                                                                    | EKX45696                     | SET                         | NP_064612 histone-lysine N-methyltransferase PRDM9              | 5E-02   |
|                                   |                       |                                                                                                 | EKX35628                     | SET                         | NP_004982 MDS1 and EVI1 complex locus protein EVI1 isoform c    | 2E-04   |
|                                   |                       |                                                                                                 | EKX48836                     | -                           | NP_955533 PR domain zinc finger protein 16 isoform 2            | 9E-02   |
| <i>Komagataella pastoris</i>      | <i>Kpas</i>           | Opisthokonta; Fungi; Dikarya; Ascomycota                                                        | -                            | -                           | -                                                               | -       |
| <i>Leptosphaeria maculans</i>     | <i>Lmac</i>           | Opisthokonta; Fungi; Dikarya; Ascomycota                                                        | -                            | -                           | -                                                               | -       |
| <i>Magnaporthe oryzae</i>         | <i>Mory</i>           | Opisthokonta; Fungi; Dikarya; Ascomycota                                                        | MGG_12536T0                  | -                           | NP_955533 PR domain zinc finger protein 16 isoform 2            | 6E-12   |
|                                   |                       |                                                                                                 | MGG_03030T0                  | 2 X zf-H2C2_2               | NP_004982 MDS1 and EVI1 complex locus protein EVI1 isoform c    | 6E-08   |
|                                   |                       |                                                                                                 | MGG_15393T0                  | 1 X zf-H2C2_2               | NP_004982 MDS1 and EVI1 complex locus protein EVI1 isoform c    | 1E-07   |
|                                   |                       |                                                                                                 | MGG_12009T0                  | 1 X zf-met                  | NP_001157471 MDS1 and EVI1 complex locus protein EVI1 isoform d | 9E-04   |
| <i>Melampsora larici-populina</i> | <i>Mlar</i>           | Opisthokonta; Fungi; Dikarya; Basidiomycota                                                     | -                            | -                           | -                                                               | -       |
| <i>Monosiga brevicollis</i>       | <i>Mbre</i>           | Opisthokonta; Choanoflagellida; Codonosigidae                                                   | fgenes2_pg.scaffold_14000153 | 1 X zf-H2C2_2               | NP_071397 PR domain zinc finger protein 16 isoform 1            | 4E-12   |
|                                   |                       |                                                                                                 | estExt_fgenes2_pg.C_50338    | 2 X zf-H2C2_2               | NP_071397 PR domain zinc finger protein 16 isoform 1            | 1E-12   |
|                                   |                       |                                                                                                 | estExt_fgenes2_pg.C_120214   | 1 X zf-C2H2_4               | NP_067632 PR domain zinc finger protein 12                      | 8E-11   |
| <i>Mortierella verticillata</i>   | <i>Mver</i>           | Opisthokonta; Fungi; Fungi incertae sedis; Early diverging fungal lineages; Mortierellomycotina | MVEG_03499T0                 | -                           | NP_071398 PR domain zinc finger protein 15 isoform 1            | 6E-04   |
| <i>Neurospora crassa</i>          | <i>Ncra</i>           | Opisthokonta; Fungi; Dikarya; Ascomycota                                                        | -                            | -                           | -                                                               | -       |
| <i>Rhizopus oryzae</i>            | <i>Rory</i>           | Opisthokonta; Fungi; Fungi incertae sedis; Early diverging fungal lineages; Mucoromycotina      | -                            | -                           | -                                                               | -       |
| <i>Saccharomyces cerevisiae</i>   | <i>Scer</i>           | Opisthokonta; Fungi; Dikarya; Ascomycota                                                        | -                            | -                           | -                                                               | -       |
| <i>Salpingoeca rosetta</i>        | <i>Sros</i>           | Opisthokonta; Choanoflagellida; Salpingoecidae                                                  | PTSG_08808T0                 | 3 X zf-H2C2_2               | NP_064612 histone-lysine N-methyltransferase PRDM9              | 1E-40   |
| <i>Schizosaccharomyces pombe</i>  | <i>Spom</i>           | Opisthokonta; Fungi; Dikarya; Ascomycota                                                        | -                            | -                           | -                                                               | -       |
| <i>Sphaeroforma arctica</i>       | <i>Sarc</i>           | Opisthokonta; Opisthokonta incertae sedis; Ichthyosporea                                        | -                            | -                           | -                                                               | -       |
| <i>Spizellomyces punctatus</i>    | <i>Spun</i>           | Opisthokonta; Fungi; Chytridiomycota; Chytridiomycetes                                          | SPPG_05829T0                 | 1 X zf-H2C2_2               | NP_001157472 MDS1 and EVI1 complex locus protein EVI1 isoform e | 1E-14   |
| <i>Tetrahymena</i>                | <i>Ttet</i>           | Alveolata; Ciliophora; Intramacronucleata                                                       | EAR96094                     | -                           | NP_001092873 PR domain zinc finger protein 8                    | 6E-04   |
|                                   |                       |                                                                                                 | EAR96093                     | -                           | NP_001092873 PR domain zinc finger protein 8                    | 3E-03   |



**Table S17: Proteins from non-metazoan species with similarity to animal Prdm proteins.**

| Species names                   | Species abbreviations | Phylogenetic group                                     | Proteins      | Domain(s)     | Best Blast hit in Human                                                        | E-value |
|---------------------------------|-----------------------|--------------------------------------------------------|---------------|---------------|--------------------------------------------------------------------------------|---------|
| <i>thermophila</i>              |                       | Miramastromycota;<br>Oligohymenophorea                 | EAR96090      | -             | NP_001092873 PR domain zinc finger protein 8                                   | 1E-02   |
|                                 |                       |                                                        | EAR92589      | -             | NP_071398 PR domain zinc finger protein 15                                     | 2E-02   |
| <i>Thalassiosira pseudonana</i> | <i>Tpse</i>           | Stramenopiles; Bacillariophyta;<br>Coscinodiscophyceae | Thaps6535     | SET           | NP_079532 histone-lysine N-methyltransferase, H3 lysine-9 specific 3 isoform b | 5E-10   |
| <i>Thecamonas trahens</i>       | <i>Ttra</i>           | Apusozoa; Apusomonadidae                               | -             | -             | -                                                                              | -       |
| <i>Toxoplasma gondii</i>        | <i>Tgon</i>           | Alveolata; Apicomplexa;<br>Conoidasida                 | TGME49_046520 | -             | NP_064613 PR domain zinc finger protein 10 isoform 1                           | 2,74    |
| <i>Trypanosoma brucei</i>       | <i>Tbru</i>           | Euglenozoa; Kinetoplastida                             | EAN76378      | 1 X zf-H2C2_2 | NP_061169 PR domain zinc finger protein 5                                      | 1E-08   |
|                                 |                       |                                                        | EAN79525      | -             | NP_443722 probable histone-lysine N-methyltransferase PRDM7 isoform 2          | 0,93    |

**Table S18: SET domain genes in selected opisthokont species.**

| Species                          | Phylogenetic group                                                                 | Number of putative orthologs of Human SET domain gene | Number of proteins with a SET domain |
|----------------------------------|------------------------------------------------------------------------------------|-------------------------------------------------------|--------------------------------------|
| <i>Allomyces macrogynus</i>      | Opisthokonta; Fungi; Blastocladiomycota                                            | 25                                                    | 20                                   |
| <i>Amphimedon queenslandica</i>  | Opisthokonta; Metazoa; Porifera                                                    | 34                                                    | 23                                   |
| <i>Branchiostoma floridae</i>    | Opisthokonta; Metazoa; Eumetazoa; Bilateria; Deuterostomia; Chordata               | 63                                                    | 45                                   |
| <i>Capsaspora owczarzaki</i>     | Opisthokonta; Opisthokonta incertae sedis; Ichthyosporea                           | 29                                                    | 19                                   |
| <i>Dictyostelium discoideum</i>  | Amoebozoa; Mycetozoa                                                               | 35                                                    | 21                                   |
| <i>Drosophila melanogaster</i>   | Opisthokonta; Metazoa; Eumetazoa; Bilateria; Protostomia; Ecdysozoa; Arthropoda    | -                                                     | 24                                   |
| <i>Homo sapiens</i>              | Opisthokonta; Metazoa; Eumetazoa; Bilateria; Deuterostomia; Chordata               | -                                                     | 46                                   |
| <i>Lottia gigantea</i>           | Opisthokonta; Metazoa; Eumetazoa; Bilateria; Protostomia; Lophotrochozoa; Mollusca | 46                                                    | 31                                   |
| <i>Mnemiopsis leidyi</i>         | Opisthokonta; Metazoa; Eumetazoa; Ctenophora                                       | 37                                                    | 24                                   |
| <i>Monosiga brevicollis</i>      | Opisthokonta; Choanoflagellida; Codonosigidae                                      | 27                                                    | 19                                   |
| <i>Nematostella vectensis</i>    | Opisthokonta; Metazoa; Eumetazoa; Cnidaria                                         | 49                                                    | 31                                   |
| <i>Saccharomyces cerevisiae</i>  | Opisthokonta; Fungi; Dikarya; Ascomycota                                           | -                                                     | 7                                    |
| <i>Salpingoeca rosetta</i>       | Opisthokonta; Choanoflagellida; Salpingoecidae                                     | 22                                                    | 16                                   |
| <i>Schizosaccharomyces pombe</i> | Opisthokonta; Fungi; Dikarya; Ascomycota                                           | -                                                     | 11                                   |
| <i>Sphaeroforma arctica</i>      | Opisthokonta; Opisthokonta incertae sedis; Ichthyosporea                           | 39                                                    | 26                                   |
| <i>Spizellomyces punctatus</i>   | Opisthokonta; Fungi; Chytridiomycota; Chytridiomycetes                             | 31                                                    | 21                                   |
| <i>Strigamia maritima</i>        | Opisthokonta; Metazoa; Eumetazoa; Bilateria; Protostomia; Ecdysozoa; Arthropoda    | 44                                                    | 27                                   |
| <i>Thecamonas trahens</i>        | Apusozoa; Apusomonadidae                                                           | 13                                                    | 8                                    |
